# Supplementary material for: Comparative Membrane-Associated Proteomics of Three Different Immune Reactions in Potato
Source: Int J Mol Sci. 2018 Feb 10;19(2):538. doi: 10.3390/ijms19020538 (PMC5855760; doi:10.3390/ijms19020538)
Supplement: Supplementary file 1 [file ijms-19-00538-s001.xlsx]

## Sheet: Table S1
Supplemental table 1. All peptides identified and quantified by MSMS analysis.
Posttranslational modifications are indicated by the modified amiono acid in paranthesis after the peptide sequence. The position of the modified amino acid is indicated by a 1 in a string of zeros. The first zero after the point corresponds to the first amino acid of the peptide.
Peptide Sequence	External IDs	Charge	Average RT	Average m/z	Empty vector 18 h	Empty vector 18 h	Empty vector 18 h	Empty vector 18 h	Blb1 - IpiO 18 h	Blb1 - IpiO 18 h	Blb1 - IpiO 18 h	Blb1 - IpiO 18 h	Blb1 - IpiO 18 h	Blb1 - IpiO 18 h	Blb1 - IpiO 18 h	Blb1 - IpiO 18 h	Avr2 - R2 18 h	Avr2 - R2 18 h	Avr2 - R2 18 h	Avr2 - R2 18 h	Avr2 - R2 18 h	Avr2 - R2 18 h	Avr2 - R2 18 h	Avr2 - R2 18 h
FDAAGVAFEGR	A0A083ZQ25,G6XPN0	2	44.3087	570.28	94902096	67790496	44389100	39308800	54568000	70477696	60254900	108637000	46155800	53492000	67397000	42457600	70780400	54761200	86813904	42861700	63734800	86218704	84429296	86649904
ETVDGEEFMSLFIDGK Oxidation (M) @0.0000000010000000.0	A1KXM7,P400017466,O82150	2	53.3438	916.921	52405100	57317000	71808760	44923168	48105520	41217200	68142624	53382600	35599720	43962500	77660136	38483880	72308096	52668780	44590160	30339840	21481200	41688080	36565000	31376450
FQEVPETGVTFADVAGADQAK	A1KXM7,P400017466,P400017467,O82150	3	47.0958	727.359	23216000	31402900	16687600	6768590	17473100	29092700	12827100	13676500	6007060	8647650	15768000	9165670	29640000	9366720	13240400	8089280	9791450	28179200	22570100	18696200
SQGGPGGPGGLGGPMDFGR Oxidation (M) @0.0000000000000010000.0	A1KXM7,P400017466,P400017467,O82150	2	35.5719	858.896	374473984	298781984	145697888	123465000	202447904	304555008	189319696	259826000	131134208	175743904	204047008	126091704	233088000	269224992	211207008	249144000	170320096	185385504	229260000	302475008
QVTVDRPDVAGR	A1KXM7,P400017466,Q9FH02,B9DHL9,C0Z226,Q39102,P400017467,O82150	3	25.1794	438.238	562004990	683473020	160531008	189269136	309022016	329571008	274497984	294732000	206284992	237367008	257163008	164414000	345600992	330663008	445096000	343576000	310676992	547257980	418455008	291316000
LYDFFYTNSASLFAEAEK	A4K3G0,A4K3G1,Q8H1X6,Q8RW06,PGSC0003DMP400002125	2	62.664	1058.5	null	null	5589050	null	null	null	2526380	4731480	4434830	6599890	2990350	2820890	null	null	null	null	null	null	5279080	4121420
SALGASITITSLK	A4K3G0,A4K3G1,Q8H1X6,Q8RW06,PGSC0003DMP400002125	2	44.6684	631.375	4548970	3092730	5211780	2416250	2313110	null	1686310	3596150	2291040	6413790	4991940	1637310	4694280	3185330	6198920	4298600	5142730	7535550	5526860	7989730
SVVYEALR	A4K3G0,A4K3G1,Q8H1X6,Q8RW06,PGSC0003DMP400002125,A4K3F9,A4K3G2,A4K3G3,Q9LLB0	2	33.624	468.763	21965500	25899700	8106940	9352270	12583200	17746200	9880900	10831300	8325430	19169800	15480800	6436570	21609900	17198600	23361300	25918500	17826600	25335000	15902600	25698300
DLFTGTYMPSTELTGGYR Oxidation (M) @0.000000010000000000.0	A4K3G0,A4K3G1,Q8H1X6,Q8RW06,PGSC0003DMP400002125,A4K3G3,A4K3G2,Q96242	2	50.2517	1012.97	10755100	14485400	12750400	10552900	19778600	6600620	11349100	7951590	3760370	12938000	10463000	8259190	null	12007200	17973800	12193900	15228300	13526000	11173000	9700090
FLDDLILHTFR	A4K3G0,Q8H1X6,Q8RW06,PGSC0003DMP400002125,A4K3G2,A4K3F9	3	57.246	463.925	6700020	3725400	6837350	4992980	7474410	5904400	3397890	4513790	5300940	14033700	19270700	9964330	11821500	14620900	12048900	8267360	18349700	27070000	13597000	21611000
MTLQQILAR Oxidation (M) @0.100000000.0	A5JV19,A0N062,P93236,A8UDS7,Q9FGC7,Q9FGC7-2,D5M911,D5M912,PGSC0003DMP400007171,Q3HNF5	2	41.4137	545.307	112943296	88902400	78638496	35602300	64467400	98285400	66241900	73090600	31583300	56265900	50387400	31700400	83195904	59591300	78128000	72478096	70065000	105323104	70594096	110792896
AYLGVGLGPLSFLTQYR	A5JV19,D5M911,D5M912,P93236,PGSC0003DMP400007171,A0N062	2	67.8993	928.013	13161800	8253850	10724600	5643960	14537800	3201300	5970140	8385110	6126520	17650000	3100100	3150560	6447060	13488700	9512160	11196500	8154630	11353800	8108550	3368490
FHPSDVIEFGSDK	A5JV19,P93236,D5M911,D5M912,PGSC0003DMP400007171,Q3HNF5	3	41.6562	493.239	10717600	11061800	7964220	4528700	11410200	11706300	6539580	8526130	5040370	8685020	11439700	5726950	13313400	9733050	7825880	8962790	12595300	19545600	12345000	23720600
FNPEFLVK	A7LKN1,A7LKN2,Q9FI14	2	24.9528	497.273	64148700	46092200	27278400	19966400	43053900	40058600	21246500	52484900	21945000	41567300	32486200	14019600	28293200	31065600	41881100	56205600	53573900	66586700	55776800	44416800
LFAVGLFR	A7XZB8,Q7XAB8,P400031941,P400031942	2	52.9401	461.781	38049800	52545900	21225200	37489800	65856600	49111400	48341200	58667000	28543300	39810400	81160304	51285100	64206600	77164200	59930100	45292700	53524400	105272000	102611000	114214000
RTQDGGTEVVEAK	A8MQK3,Q9LKA3,Q5DNZ8,Q8L5A6,Q8L5C8,Q8L5C9,Q8L6B7,Q9ZP06,Q645N1,P400021915,P400026964	3	16.8271	463.904	931902	2130960	622944	416755	1123710	984455	376327	1035810	317048	null	379971	109978	1135010	368985	805481	420894	1110940	887660	450459	1089470
VGSSEAALLAK	A8MQR4,Q307Z8,O04204,Q42112,P57691,P400040514	2	30.819	523.3	18281400	20269700	9800280	4264780	11023500	9152250	5971840	16633800	4506940	12074600	11687400	3403780	11402700	4915660	11835300	21892800	20238000	23994100	18043900	17724600
DAGGFEALVTGK	A8MRU9,Q8S9M1,Q8S9M1-2,Q8S9M1-3,Q8S9M1-4,Q8S9M1-5	2	46.5136	582.801	29095800	22535300	27699700	12367600	17861400	39468900	26494900	49793900	24145400	25282300	22435600	11543500	36231500	22576800	29130000	18435600	28386500	47643300	39886200	38275800
TPFYSISLWGK	A9CBT6,Q2MIE0,Q2VED3,Q8HSA9,Q8HSB0,Q8HSB3,Q8HSB8,Q8HSC3,Q8HSC8,Q8HSD4,Q8HSD5,Q8HSD7,Q8HSD8,Q8HSF6,Q8HSF7,Q8HSF8,Q8HSG2,Q9MUB7,Q95AI7,Q95672,Q95674,Q95679,Q95690,P400050537,Q8HS90,Q95680,Q8HSB4,Q8HSD0,Q8HSD9,Q8HSF0,Q8HSF9,Q9MUB4,Q95671,Q95673,Q95684,Q8HS91,Q8HSC7,Q8HSE0,Q8HSG4,Q95669,Q8HS95,Q8HSA4,Q8HSA7,Q8HSB1,Q8HSC4,Q8HSC6,Q8HSD2,Q8HSE1,Q8HSF5,Q8HSG0,Q9MUA4,Q9MUB3,Q9MUB5,Q95670,Q95682,Q95688,Q8H…	2	54.6228	649.846	3948780	5702690	3841130	4559310	5025530	5331700	5118020	5451440	6576030	5889160	7399480	6939960	5258700	7290430	6811900	4513470	6871630	11938300	10978800	9291400
IPSVFWVWK	B0FFR0,B0FFR3,Q2VEH4,B0BDK0,B0BDK1,B0FFQ7,B0FFR6,B0Z4E9,Q2MI97,Q2MII4,Q3C1J9,A9YTK3,Q33C31,P12201,P56754	2	59.9899	581.329	3117710	2313240	3050000	1839970	4192170	3263940	2641820	5276110	4170740	4292520	4842360	4612960	2430350	5968180	null	3294400	9230700	15123900	10459200	9608060
IEDDVDQPEELCIK	B0FFR0,B0FFR3,Q2VEH4,PGSC0003DMP400004746	2	39.521	851.899	19742300	13303100	10991300	8146840	12555600	14978400	9952530	16836100	8012860	12651200	14694400	8655480	13646000	20013800	21388800	12925900	16364400	29491900	20710400	27346500
SQCAYDVAPGGLLASVYHLTR	B0FFR0,B0FFR3,Q2VEH4,PGSC0003DMP400004746,B0BDK0,B0BDK1,B0FFQ7,B0FFR6,B0Z4E9,Q2MI97,Q2MII4,Q3C1J9,A9YTK3,Q33C31,P12201,P56754	3	56.8473	760.051	4261140	3474410	null	3348780	null	5322980	3678480	6222610	7383400	9786690	15434100	7495170	null	11828600	7924000	4383690	12318000	18671600	18338300	22145900
KVEAELVALK	B0FPA4	2	32.158	550.341	348220000	275680000	78957200	143455008	155328000	203400000	162840992	256768992	121792000	183070000	196092992	127884000	220980992	224918000	260868000	234926000	215628000	335913984	273559008	397847008
ATPQQVADYTLNLLK	B0FPD8,PGSC0003DMP400005640	2	60.6124	837.961	110623000	108750000	213220000	60843200	137752000	144132000	149788992	118120000	45233100	169292992	107811000	72306704	191234000	132577000	84964000	83395696	160208864	180699008	131136000	159622000
ATPQQVADYTLNLLK	B0FPD8,PGSC0003DMP400005640	3	60.751	558.976	14357100	null	38115000	9352750	null	32666300	23537800	14585840	5319710	15038000	14059200	12685000	53818800	22350900	null	19029000	28111700	36150900	18724500	27027000
TWGGQPENVK	B0FPD8,PGSC0003DMP400005640,P93565,PGSC0003DMP400005639,F2VJ75,Q9SXX5,A1BQW8	2	25.8054	558.282	46233848	44226800	51303300	16652120	67796920	51677000	54535800	33096140	20774020	66455300	34695552	19291660	73071048	41431808	43492400	55493192	68452736	65895300	53522920	56303048
ALQNTCLK	B0FPD8,PGSC0003DMP400005640,P93565,PGSC0003DMP400005639,F2VJ75,Q9SXX5,A1BQW8,P400046331,PGSC0003DMP400006333,PGSC0003DMP400006334,P400021255,Q944G9,Q9SXX4,Q9SJU4,P400046329,P400046330	2	22.4208	474.254	96165904	123240000	88195296	30452000	167280992	161884000	137075008	101702000	33404300	119256000	43636200	29262500	179262000	95737504	92436000	60507600	149032000	157672992	93314000	164635008
LASIGLENTEANR	B0FPD8,PGSC0003DMP400005640,P93565,PGSC0003DMP400005639,F2VJ75,Q9SXX5,C0Z2F2,F4IGL7,Q9SXX4,Q9SJU4,F4IGL5	2	34.3487	694.365	207965472	162046000	146615008	38879900	169199008	235084992	177178000	92697600	34396600	166144992	83234304	47456500	256616000	145824000	108086960	null	240144000	210820992	146255008	207500000
GILAMDESNATCGK Oxidation (M) @0.00001000000000.0	B0FPD8,PGSC0003DMP400005640,P93565,PGSC0003DMP400005639,F2VJ75,Q9SXX5,PGSC0003DMP400006333,PGSC0003DMP400006334,Q9SXX4,Q944G9,F4JUJ5,P400021255	2	28.2794	741.835	101809000	149518000	123312000	30189200	193524000	176182000	144628000	111568000	31329100	101801000	51835200	32316000	180588992	96857000	59195900	47043400	98961000	124760000	37152200	66446900
ANSLAQLGK	B0FPD8,PGSC0003DMP400005640,P93565,PGSC0003DMP400005639,F2VJ75,Q9SXX5,Q9SJU4,F4IGL5,A1BQW8,P400046329,P400046330,P400046331,Q8GV31,Q38JH2,Q56ZF2,Q41992,P400053206,P400053207,PGSC0003DMP400006333,PGSC0003DMP400006334,Q944G9,Q9ZU52	2	26.7565	451.258	190575008	260328992	148248000	43859800	300846016	285743008	231460992	175833792	61723600	198359008	59349260	51508700	314001984	198966704	138141296	158422608	201879696	366157888	175398304	260095008
GLVPLAGSNDESWCQGLDGLASR	B0FPD8,PGSC0003DMP400005640,P93565,PGSC0003DMP400005639,F2VJ75,Q9SXX5,Q9SXX4	2	55.3579	1201.58	11216500	11089600	18693300	5110740	16879900	9937210	12171200	6471650	4175920	22231800	13193100	7801240	19682400	12739200	9183880	5581140	21434700	23430400	14289500	21716000
GLVPLAGSNDESWCQGLDGLASR	B0FPD8,PGSC0003DMP400005640,P93565,PGSC0003DMP400005639,F2VJ75,Q9SXX5,Q9SXX4	3	59.2698	801.386	null	null	null	null	null	null	null	null	null	null	null	null	null	null	null	null	null	null	null	null
AAQDTLLVR	B0FPD8,PGSC0003DMP400005640,P93565,PGSC0003DMP400005639,PGSC0003DMP400006333,PGSC0003DMP400006334	2	31.2077	493.787	204884192	245076000	158104000	53489100	302540992	183664992	191252000	112063000	50944900	192918000	87202200	51478100	273600992	120374000	177446000	224586000	263942000	281987008	167512000	265204000
AKANSLAQLGK	B0FPD8,PGSC0003DMP400005640,P93565,PGSC0003DMP400005639,Q9SJU4,P400046331,F4IGL5,Q8GV31,Q38JH2,Q56ZF2,Q41992,P400053206,P400053207,PGSC0003DMP400006333,PGSC0003DMP400006334,F2VJ75,Q9SXX5,Q944G9,A1BQW8,P400046329,P400046330,Q9ZU52	2	21.2637	550.826	7917860	7073940	4811090	3263640	12307400	12213200	6270650	7818830	2441490	8377960	3138630	2538380	9596500	10248000	8672540	14130300	11773600	13327400	6561430	16956100
GILAMDESNATCGK	B0FPD8,PGSC0003DMP400005640,P93565,PGSC0003DMP400005639,Q9SXX4,F2VJ75,Q9SXX5,PGSC0003DMP400006333,PGSC0003DMP400006334,P400021255,F4JUJ5,Q944G9	2	36.3258	733.835	2447240	null	832519	2543230	null	2102570	null	null	2455940	null	2139000	2139950	2229300	2713570	4879430	3874900	null	null	null	null
KIVDVLIEQNIVPGIK	B0FPD8,P93565,PGSC0003DMP400005639,PGSC0003DMP400005640	3	51.8886	593.367	19695900	28125100	42451500	12259000	50431500	37285700	41085000	33482600	10154900	35897400	30389900	16409900	68947600	35151700	21642100	21509500	37517100	42881000	29316000	33065000
YAAISQDNGLVPIVEPEILLDGEHGIDR	B0FPD8,P93565,PGSC0003DMP400005639,PGSC0003DMP400005640	3	59.9037	1011.86	38673200	40599200	96358000	23007600	70850000	55634100	52459400	45393200	24673800	77812896	44655500	37152700	63795800	54715600	43930300	47743500	84542416	106064544	61327600	97601000
SAAYYQQGAR	B0FPD8,P93565,PGSC0003DMP400005639,PGSC0003DMP400005640,PGSC0003DMP400006333,PGSC0003DMP400006334,Q9SXX4,A1BQW8,P400021255	2	21.1874	557.768	130482000	142876000	162978000	49134100	225676992	199750000	178948992	148806000	45624800	131937000	81129400	53009200	208546000	130690000	120538000	96534000	147898000	182843008	118950000	200371008
GQTVGVIGAGR	B2D2G3,F4HVJ9,B9DHJ0,Q9C9W5,O04213,P400010972	2	26.4475	507.789	28825800	43491500	17979300	9929430	20731800	22246200	12688200	22817800	7991030	10179600	10697500	5516920	30136500	26832900	18695700	16876300	18536700	20856600	21599500	27232600
TFYYDILKR	B3H4K6,B9DF98,Q9SW18	2	44.195	609.825	55260692	37101060	56109800	31518380	47332808	84106456	39977540	52563488	24374280	57900300	46227480	20277870	56733100	35646512	62378140	43401440	54795360	66452460	58863820	80872704
TFYYDILKR	B3H4K6,B9DF98,Q9SW18	3	44.0336	406.891	55392500	34768200	29443000	16249300	27974800	67218896	19267400	33325700	18013200	31416600	21931600	9829750	37802700	26809900	52121500	21767900	57807400	77082400	57215800	72787200
LQFQVPK	B3H4M0,F4J034,F4J036,F4J037,Q9FPH6,Q9LVZ5,P400049872,P400049873	2	37.4207	430.257	42697000	31475400	7476700	12526400	13854900	30992900	18656800	36771400	12847300	17154100	17572600	10712800	25379300	27385400	32386700	27274900	28165200	45826600	35256300	50504500
YLSSYIK	B3H5Q1,B3H5Q1-2,B3H5Q1-3,B3H5Q1-4,B3H5Q1-5,Q570I7	2	21.2375	437.238	32995000	40599800	11482800	14024400	25198400	25784700	14452400	26182100	9379220	5989160	17390000	9521860	26152700	13605000	16278000	5511900	11081300	41792800	24272400	40546400
IDCGGACAAR	B5AGT4,E5KBY0,Q93X17,PGSC0003DMP400002893	2	17.6753	525.726	null	405370	null	172849	null	null	null	null	66061	null	172704	390976	null	285495	null	null	null	null	null	null
GGLDFTKDDENVNSQPF	B5LBZ7	2	46.1392	941.93	4812360	6523200	26547500	2548140	8040640	7583200	16546000	6404850	1492340	9227750	7236810	null	11320300	null	3422800	2775730	null	3454540	null	2165920
LSQEEIER	B7U9Z3,Q03684,Q03685,P49118,P400021684,P400032316,Q03681,Q03682,Q03683,Q03686	2	23.8397	502.258	14217000	8474100	7517250	8668540	9526110	8396780	3532020	10729500	3639880	9737080	7390510	2290160	5429600	6505050	10082400	12960500	12022100	12999400	13610500	14067200
EAEEFAEEDKK	B7U9Z3,Q03684,Q03685,P49118,P400021684,P400032316,Q03681,Q03682,Q03683,Q03686,Q9LKR3,Q39043,Q56Y82	2	20.6352	662.799	1737530	947947	1640110	923220	1436860	991918	552549	2208070	662572	1583900	1951930	464417	784838	696941	935520	1474450	929648	1544780	1472530	1192310
SAPSSSPWYGPDR	B8XLF1,Q41421,P400014555,P400014556,P400015466,P400064602,Q41426,Q41424,Q41423,P07370,Q41425,Q41422	2	35.1023	703.823	8349509100	6593569800	2852393470	3899352830	5367875100	7347157000	5317444100	6543075300	5001310200	4441607700	6249613300	4179496190	5814280200	8102749700	7591367200	5229490200	5720840200	9076278300	7060129800	9767895000
AAVTPAFAAQFPGLNGLGLSAAR	B9A6I8	2	58.9667	1100.6	52101300	47701300	29350800	27134500	31717200	23133550	23331610	51893700	32017050	30909300	48010600	52055300	29362000	70419400	58027400	33857200	46735000	67669600	58204600	100215904
AAVTPAFAAQFPGLNGLGLSAAR	B9A6I8	3	58.9101	734.071	33535300	28860910	20454730	17511990	28173300	20565550	17964140	33929648	21467100	18485980	31918300	35590500	30378400	52916900	40923600	29653980	42348800	58920700	44784400	75303504
GPESPAGYSCK	B9A6I8,P400020595	2	21.2773	576.754	5970780	6140660	3909090	2119830	null	4191530	3721280	10295300	3812640	null	5611730	3017820	4510430	5581120	6763830	3898510	5624990	7490760	5935460	9818680
AEILKEK	B9DFH6,F4J737,Q9LYT4,F4J738	2	34.3656	415.755	421075008	288790016	66834100	113330000	97976600	195416992	169894000	212939008	140263008	128000000	147878000	127391000	180695008	223600992	193056992	227724000	170908000	287548992	212464000	327841984
TLTDNMVVGVSK Oxidation (M) @0.000001000000.0	B9DI38,O23049,P400041249	2	29.6179	640.334	24943700	15355300	15062800	4690520	26585000	18984600	15138300	22938200	8139390	16341200	9755460	5539060	13964400	14265900	17565100	18968600	17236100	31260300	10837900	27359400
RIAELYR	B9JNE9	2	24.8702	460.77	103266000	65592900	12072500	22480800	84959504	97122800	51520900	93533400	49809600	40945200	34299600	7620770	56149800	70388896	83390400	85798304	58224700	113614000	93130600	106622000
LVSWEAVSSR	C0JPM8,PGSC0003DMP400009317,PGSC0003DMP400009318,Q84Y00,P22302	2	38.3542	567.304	null	21136800	null	null	17564200	18111600	28495800	23822000	null	23631900	null	10221700	32852000	26588500	23953100	24181700	47004600	53783500	24321900	29815700
SLFLSIVAAELDPK	C0KKU8	2	67.0845	751.931	4339430	4447240	1964160	2681960	2810640	null	1483250	null	1197860	4069560	5136490	4020550	1432510	7268990	5938620	4076570	4877190	13362000	5977730	6461250
TVGGTNLSLTR	C0KKU8	2	31.6714	559.814	12284300	13861300	1648720	6200910	8736970	5574730	4327560	3259470	3292260	5496000	9773050	6083290	6327480	12034100	14565000	15394700	11494500	22792000	10228300	28228100
YTMEINGTAR Oxidation (M) @0.0010000000.0	C0KKU8,Q9ZS80,O49878,O49887	2	20.8904	586.273	9017930	11130660	7304650	7483986	9651000	8347100	5722770	8233060	4135188	7556660	8776970	7358310	5866400	11405680	13113320	11502500	11470180	8570140	6598570	23414560
FGLAPSANR	C0Z280,Q5EEQ1,Q8LC56,Q9SUI5,Q84QE6,P400035620	2	29.402	466.75	638931970	582439810	112954000	165308000	538107010	536671040	383264992	635010880	327227008	311448992	356539008	168299008	332683008	746910980	810195010	622307260	759096000	1245983620	1116349820	1626781440
FGLAPSANRK	C0Z280,Q5EEQ1,Q8LC56,Q9SUI5,Q84QE6,P400035620	2	24.5668	530.8	80144496	53134400	4794980	17397400	63356200	65817900	38643200	68942000	37321700	35264400	22677400	12567000	29798200	97899600	124330000	89232400	111724000	166482000	160404992	289840672
RVIYASQITAKPR	C0Z355,Q8H145,Q9ASR1,Q9SGT4,Q56WX9,Q56WY3,Q84R07	3	26.6703	501.633	10093600	6391390	3084720	2810590	8341080	7263080	2432630	8329930	2136580	4383000	1792710	2040050	5781430	4345110	4422360	8149380	10368800	12701500	9374630	7328450
APAAGGSSINQILGIK	C3W4Q1,C3W4Q2,P400014884	2	48.031	748.929	20386400	20432600	27101200	11578500	23558800	17060300	12339800	21135800	9198800	19356100	27756800	10342900	26804000	17951300	16365400	11065500	20102200	20864700	24968300	14286000
ENVKNTASLTGK	C5MR70,P26320,P400017746,E5LP98,P23322,PGSC0003DMP400004990	2	17.2017	631.341	7034390	4939330	1102190	2805810	6123780	6459970	2489030	6446150	3298750	3135800	3071340	2139020	4445660	7440470	7739230	6392830	6308060	10491700	5988450	14001300
QLVASGKPESFSGDFLVPSYR	C5MR70,P400017746	3	47.927	762.063	3248335870	2996318720	2217499900	2418840060	3214340100	2648490750	2378608640	2734240000	1819740030	1869184510	2450089980	2295405570	3361440000	3521756420	3332780030	1692309120	2303879940	4187859970	3029160190	3009014020
KFCLEPTSFTVK	C5MR70,Q157M5,P26320,P23322,PGSC0003DMP400004990,E5LP98,Q157M6,P400017746,Q40459,Q84QE8	3	42.5076	486.257	2645870080	2326836480	1321811070	1405084160	1813924990	2940077570	1900663940	2607759100	1462599170	1696017920	2054071940	1371851010	2881586690	1992314750	2046962180	892841600	2641606910	4249934850	2957779970	3643720700
EGNFDLVGNNFPVFFIR	C6FFS2,Q6T2D5,Q9XHH3,O24107,O24511,P49315,PGSC0003DMP400002845,F4JM86,Q8W1L2,B9DFK6,Q940G2,P25819	2	65.9837	993.005	17828800	16557620	13047700	10139100	12880300	9772110	8310580	22592200	9621100	6683940	3856660	5581550	12511400	24545100	10083600	4398380	12800700	8369190	14738200	6858710
TLADYNIQK	C7ENV4,E2I6L5,Q2XTF0,A3FMH5,F4YBD5,Q5EC25,B8R518,B8R519,Q8RUC6,A9YTY9,B9DHA6,Q9SHE7,Q45FL8,O04829,O24122,Q39256,Q41431,Q41501,Q41930,Q41965,Q41972,Q42202,Q42214,O49906,P59232,P59233,P59271,P62980,P62981,P93379,PGSC0003DMP400008150,PGSC0003DMP400008300,PGSC0003DMP400009230,P400019895,P400038526,Q3E7K8,F4I9X6,F4JGM3,B6A8D0,Q6KFR7,Q6KFR8,Q6KFR9,Q7GAQ5,Q8LDD7,Q8RVF7,Q9FHQ6,O64955,P0CH33,Q3E7T8-2,A6XI…	2	30.4668	533.284	34489400	31537300	14468700	10542200	20051300	28503200	12749900	33270500	9978800	20122500	22512400	9149690	24509800	14753000	27276300	40442200	30178800	45190100	37543900	37402800
NLELTPAVK	C9EFD1,Q672Q2,P400046919	2	39.8204	492.79	null	null	null	null	null	null	null	null	null	null	null	null	null	null	null	null	null	null	null	null
EGGYGLIIPK	C9EFD1,Q672Q2,P400046919,Q9FLV3,Q94K97	2	41.9111	523.8	15687500	17337200	25925900	6750940	30248400	26286800	29271700	null	6375180	11944800	7648660	6216020	34480400	10558100	5886350	7384330	16495500	20845000	14188300	20554800
ADLVNNLGTIAR	D0EJY9,Q2XTE5,F4K6B6,Q6R0J1,Q6UJX4,Q6UJX5,Q6UJX6,Q8GRU8,Q8H0Z5,Q8H158,Q8LRU7,E9NZ46,Q14TB1,Q53Z32,Q570T4,O03986,P27323,P36181,P51818,P55737,P400016818,P400025373,P400025374,P400038314,P400050372,P400051894	2	41.9523	628.854	15291500	14916400	17284900	6637580	8951620	11589700	4548660	18574900	4410390	9134430	13053500	5929850	9963520	5474350	6513460	12157700	19191100	22683800	18249100	18083100
AYTVQFGTCK	D2K7Z2,P400010291	2	34.0106	587.784	800571010	638193980	143158000	242346000	414191008	602444030	402510016	572435970	379224992	309612992	364488992	207540992	304958016	823508990	704483010	330732992	519571008	833075970	664451970	1117619970
KVPFISDDLALECEGK	D2K7Z2,P400010291	3	46.2739	607.644	164447008	134991008	74788896	71755400	94362896	149740992	124242000	183582000	114650000	89368704	170908000	93192896	116942000	166663008	162626000	60339100	133869000	269838016	255508992	335463008
VPFISDDLALECEGK	D2K7Z2,P400010291	2	49.8743	846.915	153704000	144116000	83148496	96551800	184619008	142161904	144848992	216284000	128849000	103158000	176220992	119141000	139398000	287009536	236630000	72154000	147024992	272025984	255834000	363980000
VPFISDDLALECEGKDK	D2K7Z2,P400010291	3	45.9842	645.987	104809000	110932000	58503500	59858000	69318200	131596000	103399000	194311008	78155000	62413100	99351200	55797400	104444000	117741000	156836992	43362100	82669000	143460992	164452992	195528992
LATSGANFAR	D2K7Z2,P400010291,F4KC80,P49107,P49107-2	2	26.3733	504.269	1633520000	1474480000	277566016	479999008	1514130050	1592749950	945614980	1397449980	951427010	818131970	921659010	559118020	909472000	1760790020	1774749950	1223960060	1533059970	2746350080	2175849980	3652100100
CGSNVFWK	D2K7Z2,P400010291,P49107	2	36.8732	499.234	61324500	45868500	13045900	16278800	33336200	46893500	29608000	46719000	37998300	30523900	49912500	21084600	23880600	60333900	69908000	36513700	53305600	102778000	76867296	84469600
FPENFTGCQDLAK	D2K7Z2,P400010291,P49107,F4KC80,P49107-2	2	39.4136	763.85	389201056	544826620	226373104	273039488	312865888	353085216	431778304	458083808	333553696	224465488	341486592	196668800	334090912	660140290	817178560	377702176	448716512	722277500	613874750	817688130
VSVVLENGQR	D5M911,D5M912,PGSC0003DMP400007171,A0N062,Q3HNF5	2	28.1728	550.808	17627300	24131600	7400120	6856920	18826300	18915400	11068700	12883700	4643070	11987700	10236800	5537080	16901200	14810200	11468400	8222890	9676250	20145700	6212220	15599600
SAESGSPVDIISSLR	D5M911,D5M912,PGSC0003DMP400007171,A5JV19,A0N062,Q3HNF5	2	50.816	759.397	42382300	51546500	48041500	36484500	59493400	46941700	31955000	37258100	21258700	32755700	54824900	30205400	53980400	64648600	56217000	27352300	32348200	54653500	40804800	64381700
FTGDLLVGADGIR	D5M911,D5M912,PGSC0003DMP400007171,A5JV19,A0N062,Q3HNF5,P93236	2	47.1641	667.362	67000000	60263900	43591600	28315000	43889600	68265600	34414100	39575900	19980600	32156500	63156000	31826400	59166200	60453800	52368700	24660000	35300800	60117200	45375300	69152096
INGLVDGISGNWYCK	D5M911,D5M912,PGSC0003DMP400007171,A5JV19,A0N062,Q3HNF5,P93236	2	49.0623	848.416	11698400	10974300	7952460	6404760	10920600	7801030	6715980	9756710	null	8704050	12914900	null	10108000	14340500	10510400	3541490	8321740	14696400	7222720	14114300
WFEDDDALER	D5M911,D5M912,PGSC0003DMP400007171,A5JV19,P93236,Q3HNF5	2	42.1151	648.284	17221000	14034400	11717700	8239030	14035600	12993700	8576500	11228600	5844520	10235700	9082330	6000160	13589400	11866500	11395900	6767820	9818880	16478000	9685010	16993500
MTLQQILAR	D5M911,D5M912,PGSC0003DMP400007171,A5JV19,P93236,Q3HNF5,A0N062,A8UDS7,Q9FGC7,Q9FGC7-2	2	53.3256	537.311	null	null	null	null	null	null	null	null	null	null	null	null	null	null	null	null	null	null	null	null
VLVAGGGIGGLVFALAAK	D5M911,D5M912,PGSC0003DMP400007171,A5JV19,P93236,Q3HNF5,A8UDS7,Q9FGC7,Q9FGC7-2,Q40412,PGSC0003DMP400007172	2	64.837	806.997	12625100	8745880	5571720	5119430	9908000	4310600	4223780	9453670	3027500	6309270	4144100	4075580	6668300	10423400	null	4940910	7483830	14832700	8459870	5413570
ATDAEWLLLPAGNGTSGLEAIVLSR	D5M911,D5M912,PGSC0003DMP400007171,Q3HNF5	3	66.7917	852.126	1918920	1657910	1018420	1219110	null	1678920	null	null	null	1669250	1135490	null	null	2008400	null	null	1546530	null	2361510	null
ISMPIMIAPTAMQK 3 Oxidation (M) @0.00100100000100.0	E1AXT8,O82077	2	34.767	790.401	60163000	72697600	30417300	18677020	15904320	36203300	20589740	34241200	10805150	12354140	15221920	7557250	47329800	47433200	28648100	31882000	28496600	22748090	22122830	25806500
NFEGLDLGK	E1AXT8,P400013302,O82077,P400013305,Q43775,F4JFV6,Q9LRS0,O24500,O49506,O49506-2,Q2V3V9,B3H4B8,A8MS37,Q9LRR9,Q9LRR9-2	2	40.5227	496.758	40660600	87897104	78766200	28544600	32294900	36687200	33701000	61041700	22171600	27418800	36058300	18912600	73051696	47531400	44444700	38825900	51622200	54119800	59545900	41417700
GVLTAEDAR	E1AXT8,P400013302,P400013305,P400048099	2	24.59	466.247	117131000	147604992	56416600	38568700	60624900	76704600	45995700	84569296	30684800	38566200	31003600	20657300	98873296	104812000	77193000	73263928	86746704	90354800	89775000	106040000
FVLPPFLTLK	E1AXT8,P400048099,Q43775,O82077	2	63.5874	587.868	186034400	233444528	232379008	166496000	119801000	124656000	97843696	225578000	81462704	97119696	132598000	91718800	231042768	213539152	2598462	115498176	182215008	167173424	173212000	135828000
MAHPEGEYATAR Oxidation (M) @0.100000000000.0	E1AXT8,Q43775,P400013302,O82077,P400013303,Q38JG7,P400048099	3	18.5123	450.203	22381300	41514100	20023800	11226400	19072500	24340600	14874900	29059000	12180700	13341400	16401100	10345600	34554200	42545300	30191600	22421700	33572300	34680200	30424000	39657100
VGGVEVPNNK	E2FAG4,E2FAX6,C0KFR1,C0KFR2,C0KFR3,C0KFR4,C0KFR5,C0KFR6,C0KFR7,C0KFR8,C0KFR9,C0KFS0,C0KFS1,C0KFS2,C0KFS3,C0KFS4,C0KFS5,C0KFS6,C0KFS7,C0KFS8,C0KG51,C0KG52,C0KG53,C0KG54,C0KG55,C0KG56,C0KG57,C0KG58,C0KG59,C0KG60,C0KG61,E2FAD1,E2FAD3,E2FAD5,E2FAD6,E2FAD7,E2FAD8,E2FAE2,E2FAE7,E2FAE8,E2FAE9,E2FAF0,E2FAF2,E2FAF3,E2FAF4,E2FAF5,E2FAF6,E2FAF8,E2FAF9,E2FAG0,E2FAG1,E2FAG2,E2FAG3,E2FAG5,E2FAG7,E2FAH1,E2FAH2,…	2	23.7772	506.776	13708500	13272100	7517630	5119400	18640200	15246500	12592300	11098700	4562390	11979400	6573180	3566200	13718700	13399800	16907500	17470100	18893300	26220200	18859100	28536600
IDSYEDVPVNNEK	E5LCW7,E5LCW8,E5LCX0,E5LCX3,E5LCX4,Q9SP97,Q9ST61,P20721,O49877	2	31.3857	761.36	null	7785960	2986820	3754550	null	null	3347390	7999940	4269680	null	5755960	6977480	2713360	2737570	3620180	4261340	3995510	5498160	4827000	8683480
GGSTGYDNAVALPAGGRGDEEELQK	E5LP98,P23322,PGSC0003DMP400004990,P26320,C5MR70,P400017746,Q40459	3	35.4701	831.065	915244290	763162750	381442400	435012512	567755780	868708420	630803390	649211010	436207392	493958592	903573570	359921600	665662590	696036800	752599100	564675900	455905728	491980384	621380610	807752900
DGIDYAAVTVQLPGGER	E5LP98,P23322,PGSC0003DMP400004990,P26320,C5MR70,P400017746,Q40459,Q84QE8,Q58H58	2	48.3444	880.949	1516130940	901307460	1043313410	1136571260	1340608130	1146667260	1227262460	1482591740	890231300	996249860	1329344640	1032189060	1691707010	1515333120	1674986750	867862780	761504770	1392471420	1142291200	1377842430
FEEKDGIDYAAVTVQLPGGER	E5LP98,P23322,PGSC0003DMP400004990,P26320,C5MR70,P400017746,Q40459,Q84QE8,Q58H58	3	46.0727	765.385	2312524030	1743321860	1539452540	1455923580	1263432580	2119917700	1619573380	2144200580	1329996420	1381162370	1975657340	1429970560	2187854590	1566352770	1884817790	1058697090	1232305920	1910980220	1860978820	1767640450
GSSFLDPK	E5LP98,P23322,PGSC0003DMP400004990,P26320,C5MR70,P400017746,Q40459,Q84QE8,Q58H58,Q9S841,P23321,Q6RUN4	2	28.3357	425.72	7074543100	5625453600	1889152640	2683276290	3950735100	5359515100	3979780610	5495524400	3013030400	3260928000	3758030080	2262493700	5156651500	3692111360	5784316400	4736594900	3746394370	6706402300	4856270800	6562776600
NLQVVDVGGGTGFTTLGIVK	F1BPW0,P400023691	2	54.3314	988.051	14572700	20971800	15821400	15902000	9090930	13155300	13863200	9902630	8323140	17426400	15662700	9958720	11550200	19682200	15364200	12776300	15970400	19659000	20887600	22558000
ILEGDAEDLPFPTDTFDR	F1BPW0,P400023691,Q40501	2	54.0302	1025.99	28950200	36410500	34080100	28218700	27993000	27767500	25233000	17835700	16716800	33243400	28782000	20088900	23890600	34106600	27381200	27682800	24757300	36493800	28347600	36411100
LIFQYASFNNSR	F1KC21,Q2MIC0,Q2MIK7,Q2VEJ6,Q3C1G3,Q33C59,Q76MX6,P69556,P69561,P69562,P69563,P83755,PGSC0003DMP400007506,P400066470	2	46.9189	730.373	4065309950	3368059900	1999500030	1950439940	2596359940	4183739900	2717080060	3205220100	1962380030	2018280960	3537792510	2308679940	3465472770	3843709950	3440013570	1783219970	2685760000	4324910100	3460420100	4266994690
LIFQYASFNNSR	F1KC21,Q2MIC0,Q2MIK7,Q2VEJ6,Q3C1G3,Q33C59,Q76MX6,P69556,P69561,P69562,P69563,P83755,PGSC0003DMP400007506,P400066470	3	45.7986	487.252	90774320	108286920	28614200	null	58420000	141250416	40510620	75295504	14664400	13048000	40727300	16516600	111310000	47626160	30371400	13031900	66737100	187554000	116683000	117647000
ESESLWGR	F1KC21,Q2MIC0,Q2MIK7,Q2VEJ6,Q3C1G3,Q33C59,Q76MX6,P69556,P69561,P69562,P69563,P83755,PGSC0003DMP400007506,Q33128,P400027801	2	32.9133	482.232	962835010	792065020	340939008	411140000	585100990	852612990	573526020	654696000	544249020	507160000	444588000	325193984	663892990	771297980	844968000	570126020	558576000	874494980	764708990	888611970
FCNWITSTENR	F1KC21,Q2MIC0,Q2MIK7,Q2VEJ6,Q3C1G3,Q33C59,Q76MX6,P69556,P69561,P69562,P69563,P83755,PGSC0003DMP400007506,Q33128,P400027801	2	41.4353	714.325	228784000	187207008	120948000	109495000	196260000	252832992	203818000	225788992	170362000	133779000	226231008	96001200	206627008	132018000	212124992	109012000	156264000	270430016	238040000	210304000
FGQEEETYNIVAAHGYFGR	F1KC21,Q2MIC0,Q2MIK7,Q2VEJ6,Q3C1G3,Q33C59,Q76MX6,P69556,P69561,P69562,P69563,P83755,PGSC0003DMP400007506,Q33128,P400066470	2	46.7977	1094.51	51848700	46284300	28855200	16748600	25463200	51390600	42150900	62146700	37211500	44980500	64408800	51528600	66066100	72932096	78145504	28026500	52347000	76963400	66848900	80402704
VINTWADIINR	F1KC21,Q2MIC0,Q2MIK7,Q2VEJ6,Q3C1G3,Q33C59,Q76MX6,P69556,P69561,P69562,P69563,P83755,PGSC0003DMP400007506,Q33128,P400066470	2	60.3637	657.865	9388641300	7491855900	4751265800	4764347900	7392353800	6698255900	6082140200	7759301600	5135308800	4771217900	7580308500	5488993800	8612541400	8852626400	7688942600	4381249000	6149099000	10204770300	8493079600	9211763700
VINTWADIINR	F1KC21,Q2MIC0,Q2MIK7,Q2VEJ6,Q3C1G3,Q33C59,Q76MX6,P69556,P69561,P69562,P69563,P83755,PGSC0003DMP400007506,Q33128,P400066470	3	48.7305	438.913	192673088	175046608	50764800	17446400	136888880	120404912	91812304	134442000	72219688	23192000	64584000	45107980	264081520	123761000	84577000	79191232	118966464	323553984	225074368	199027136
ETTENESANEGYR	F1KC21,Q2MIC0,Q2MIK7,Q2VEJ6,Q3C1G3,Q33C59,Q76MX6,P69556,P69561,P69562,P69563,P83755,PGSC0003DMP400007506,Q33128,P400066470,P400027801	3	16.8548	500.547	22082700	45592300	446555	590862	8057430	19053800	11073300	11038200	2864480	2912020	1162610	403816	17994500	5429300	26461800	17305600	10071800	26622500	8977630	19065700
RESESLWGR	F1KC21,Q2MIC0,Q2MIK7,Q2VEJ6,Q3C1G3,Q33C59,Q76MX6,P69556,P69561,P69562,P69563,P83755,Q33128,PGSC0003DMP400007506,P400027801	2	28.2211	560.283	351992000	210664992	104373000	144931008	296796992	353307008	215704000	358495008	226919008	206048000	228659008	114051000	265500992	324238016	285479008	173320000	245795008	461336992	231847008	298350016
FGQEEETYNIVAAHGYFGR	F1KC21,Q2MIC0,Q2MIK7,Q2VEJ6,Q3C1G3,Q33C59,Q76MX6,P69556,P69561,P69562,P69563,P83755,Q33128,PGSC0003DMP400007506,P400066470	3	46.6462	730.012	889799230	842348030	514134016	573478980	516414016	966966210	710328000	1051500030	759688000	763070980	1030849980	824478020	1067160000	1226185730	1140480000	512025536	810022530	1349619970	1121110020	1230349950
ANLGMEVMHER 2 Oxidation (M) @0.00001001000.0	F1KC21,Q2MIC0,Q2MIK7,Q2VEJ6,Q3C1G3,Q33C59,Q76MX6,P69556,P69561,P69562,P69563,P83755,Q33128,P400066470	3	22.344	440.217	3204530180	3527389700	892516220	1787852030	9798660	3313783040	2157631490	2989005060	1906178690	2059555070	2013432060	1369158020	3009611520	3185453820	3877275900	2592064510	2748775420	3661757700	3297184770	5439407100
ANLGMEVMHER Oxidation (M) @0.00000001000.0	F1KC21,Q2MIC0,Q2MIK7,Q2VEJ6,Q3C1G3,Q33C59,Q76MX6,P69556,P69561,P69562,P69563,P83755,Q33128,P400066470	2	31.4274	651.801	null	null	null	null	null	null	null	null	null	null	null	null	null	null	null	null	null	null	null	null
ANLGMEVMHER Oxidation (M) @0.00000001000.0	F1KC21,Q2MIC0,Q2MIK7,Q2VEJ6,Q3C1G3,Q33C59,Q76MX6,P69556,P69561,P69562,P69563,P83755,Q33128,P400066470	3	26.4676	434.87	null	null	1920600	null	null	null	null	2727180	3743870	7452850	4445940	3447920	null	null	null	null	4626380	8667300	5666950	6077050
ANLGMEVMHER Oxidation (M) @0.00001000000.0	F1KC21,Q2MIC0,Q2MIK7,Q2VEJ6,Q3C1G3,Q33C59,Q76MX6,P69556,P69561,P69562,P69563,P83755,Q33128,P400066470	2	33.9109	651.8	null	null	null	null	null	null	null	null	null	null	null	null	null	null	null	null	null	null	null	null
ANLGMEVMHER Oxidation (M) @0.00001000000.0	F1KC21,Q2MIC0,Q2MIK7,Q2VEJ6,Q3C1G3,Q33C59,Q76MX6,P69556,P69561,P69562,P69563,P83755,Q33128,P400066470	3	29.1918	434.871	2504000	7795110	2708905	null	1016510	null	null	5812730	3110040	10346590	5514020	3761710	null	1267430	null	null	10707990	24824000	null	8536090
ETTENESANEGYR	F1KC21,Q2MIC0,Q2MIK7,Q2VEJ6,Q3C1G3,Q33C59,Q76MX6,P69556,P69561,P69562,P69563,P83755,Q33128,P400066470,PGSC0003DMP400007506,P400027801	2	17.1533	750.316	2477608960	1878713470	1039139650	1243207170	2276786690	2426247420	1705115650	2498168320	1155399040	1038351040	1753488900	1058477060	1954387200	2008796420	2409304320	1068471620	1369571710	2515887360	1936260740	2900166140
ANLGMEVMHER 2 Oxidation (M) @0.00001001000.0	F1KC21,Q2MIC0,Q2MIK7,Q2VEJ6,Q3C1G3,Q33C59,Q76MX6,Q33128,P69556,P69561,P69562,P69563,P83755,P400066470	2	22.3218	659.799	532760000	545505020	74659904	248747008	434320992	515728000	337854016	462697984	281564992	308160000	206510000	138506000	465953984	502497984	638321980	481676000	439387008	511012992	550043010	936716990
GLSAEDVNAAFR	F2Q9V9	2	40.1152	625.315	20953160	36469568	52716592	11706770	28907320	34153260	61025100	27520300	10233170	31864250	22279420	14476380	58242300	22546020	26932450	27026180	26919320	46623552	24497970	22017800
KGLSAEDVNAAFR	F2Q9V9	3	35.7194	459.911	67153104	72523696	35805200	17793950	35192200	67893600	59782800	53478300	32186100	49561000	40794300	16436900	68930896	40048600	41143400	53728800	68667600	57360600	39066300	76369504
AVSLVLPQLK	F2Q9V9,P400017652,P09044,P400051213,Q0WL92,P25857	2	48.0855	534.347	197060992	172848992	245562000	78576896	260092000	211414000	248739008	196776992	63122500	168396992	138699008	105173000	310817984	197603008	139158000	114714000	239988992	202748000	156971008	151636992
IVDNETISVDGK	F2Q9V9,P400017652,P09044,P400051213,Q0WL92,P25857	2	30.3737	645.333	196213696	173608000	105877000	42037200	171612160	176655808	177854000	154060176	48008088	152840000	77294960	59402500	236448608	110085552	140940800	167092960	132658000	229679648	122177752	199548320
GTMTTTHSYTGDQR	F2Q9V9,P400020414,P09043,C0Z2Y9,B3H4P2,Q9LPW0,F4HNZ6,P400051213,P400017652,P09044,P25856,Q0WL92,P25857	2	26.2658	778.344	null	null	null	null	null	null	null	null	null	null	null	null	null	null	null	null	null	null	null	null
AADGPLNGILAVCDEPLVSVDFR	F2Q9V9,P400051213	2	64.776	1214.61	null	null	null	null	null	null	null	5745960	1203760	9707340	null	4171180	null	null	null	null	null	null	null	null
ILDEEFGIVK	F2Q9V9,P400051213	2	44.8207	581.824	139375008	142108992	197912992	50278000	92738400	182260992	184946000	151540992	45346700	121218000	58316400	60259800	160326000	90314400	109186000	77058600	160188000	162112992	102064000	142680000
WPGSAAEGSGDALEDYCK	F2Q9V9,P400051213	2	41.4778	956.909	16102000	16467400	26927200	4896980	17709100	18767100	28664500	16548900	3335260	18897300	12216400	7044910	23420900	6866680	7200240	6317760	13348800	11522900	5849230	9036410
KVIITAPAK	F2Q9V9,P400051213,P400017652,P09044	2	22.8326	470.814	89546800	82639504	56061400	28984400	109168000	105869000	92974200	73599400	21404000	63302400	28276800	20986700	97591504	70564800	51511600	77464600	78025600	76190096	54385900	94575296
VIITAPAK	F2Q9V9,P400051213,P400017652,Q0WL92,P25857,P09044	2	26.5121	406.767	111109000	143386000	55965900	22960300	134964000	136296992	120545000	84491696	22672000	74964704	31689700	24373800	120693000	75914600	72868800	53808000	102573000	118648000	71096496	106156000
VPTPNVSVVDLVINVEKK	F2Q9V9,Q0WL92,P25857	3	55.5825	650.717	21884000	15557200	18108700	8410780	28549300	23538000	20993200	15118600	5714400	17511500	14449400	13213200	28564800	18617300	15138100	15417600	32999900	34293800	20241300	34161700
TIEVNNTDAEGR	F4INR3,Q56WM8,Q944P7,P30184,P400013800,B3TL99,Q8GZD8,Q10712,O24022,P31427,Q42876	2	23.6168	659.817	3415200	3700670	6972180	1737220	12232200	4809640	4432940	4538710	1419400	null	1662110	1285820	4524400	3230940	2136260	4228520	3756420	4195200	3041110	3281070
SGVADMVNTGGR Oxidation (M) @0.000001000000.0	F4INR3,Q56WM8,Q944P7,P30184,P400013800,Q0WLI4	2	21.3132	590.276	3528540	4314520	2477220	823064	5355110	3935010	4002880	3955080	811661	2268300	1272410	726960	3325390	2741950	2159730	3159340	1941670	3174270	1716450	2050390
APGVQTPVIVR	F4JM86,C6FFS2,Q6T2D5,Q8W1L2,B9DFK6,Q9XHH3,Q940G2,O24107,O24511,P25819,P49315,PGSC0003DMP400002845,C0Z2I6,F4HUL6,B9DG18,B9DHU0,Q42547,P49317,O64954,P400017481,P49316	2	34.7616	568.845	65008900	80173104	22020600	16490300	17050900	36758200	26533400	47108000	18706900	16436500	17585600	13127600	44699500	57692700	40360200	41212100	37670200	38927700	39210800	57961600
VMISGAPASGK Oxidation (M) @0.01000000000.0	F4JYC0,Q8VYL1,P400045307	2	22.6621	517.272	12484000	18747000	null	8442880	null	14657500	12254400	12962000	4997150	8202600	10773800	3737560	13724700	10217000	16659200	16379500	null	null	12523500	23725000
DPNATIIMLGTGTGIAPFR Oxidation (M) @0.0000000100000000000.0	F4JZ46,B9DI26,Q9FKW6	3	64.5841	654.346	198034128	38049472	204021200	254412864	293590912	316123104	340271936	543888000	972511300	788693250	695304830	615436160	299463936	815446020	48946832	213266640	955255550	1357330300	2056089730	429351168
DPNATIIMLGTGTGIAPFR	F4JZ46,B9DI26,Q9FKW6	3	64.6913	649.013	null	null	null	null	null	null	null	null	null	null	932473	null	null	null	null	null	null	null	null	null
GQAETDETLR	F4KCG9,Q8GXR9,Q8GXR9-2,P400029178,P400029179,P400029180,P400029182	2	18.9108	560.268	9399240	8377670	4090700	4079110	8180640	7826310	5462950	9299260	4302040	4753260	5388340	3634060	7526140	5345490	7614780	4488960	5311450	10133500	6752360	9239540
MGASYPTR Oxidation (M) @0.10000000.0	F7UC97	2	26.6184	449.708	null	null	null	null	null	null	null	null	null	null	null	null	null	null	null	null	null	null	null	null
DMDVIEVPTFLFIR Oxidation (M) @0.01000000000000.0	O04002,P400017580	2	66.3682	855.947	3636840	5908730	8933340	2701370	10484400	6218340	3602520	3078200	815058	10266500	5835910	2146690	6645310	5496890	6693090	5351950	8648920	5523860	5644230	5514600
LVVVEFAGK	O04002,P400017580	2	40.5988	481.292	13233800	25878800	33249300	5637860	21985200	28593800	14949600	12872300	3829920	29650100	18840900	4795800	38924900	15950900	24307100	31369900	47126600	33590100	33877500	20504200
QMADTVVFAR Oxidation (M) @0.0100000000.0	O04002,P400017580	2	32.2866	577.289	15842600	20526400	8794720	3458020	13414600	13526800	6102280	5943470	1734680	13014300	8841740	2300710	20288800	12989500	17759500	19849800	21175900	16457300	14508700	16479800
GELIGEILR	O04002,P400017580,Q9SGS4	2	47.0678	500.297	7751640	10885600	16439800	2673190	8430560	13659200	5749430	3532290	null	11951400	12299400	3146650	16730700	10792900	8490720	8434250	16186500	12343500	12801200	13959900
EKGYLQDLVYK	O22773	3	40.5328	452.58	null	9246680	5310660	2975020	6430750	5252780	6258850	8752940	4995830	6355910	8331500	2680250	7961500	9792280	12320600	8786650	16347100	24392400	21389600	18049700
GYLQDLVYK	O22773	2	45.3565	549.797	79413000	56783200	44197200	30970500	37404800	55817200	51177500	92402304	42363400	50321200	65575100	25601100	42095800	55006400	85338800	45572500	71336704	105207000	105671000	128633000
LGPNYLQLPANAPK	O24107,C6FFS2,Q6T2D5,Q9XHH3,O24511,P49315,PGSC0003DMP400002845,C0JPM9	2	44.3065	748.42	42988300	47254600	42806100	16520800	19248000	31069900	22209500	57802600	17335400	17026500	23534600	14975200	46811500	33645900	37791900	17268800	32489200	36530700	36007900	44661300
NIVIDGFVHGK	O24370,O49888,P400055325,C0KKU8	2	39.8251	599.835	11781700	10564200	8123950	5920200	8570950	7985970	6337150	6245030	4191150	13237600	12334700	7879790	12036200	11146000	13627000	11287500	12362500	23109300	11014200	18912800
EIGNYMTVEQAVQQK Oxidation (M) @0.000001000000000.0	O24370,P400055325	2	39.5088	877.429	32202500	26162700	23174600	11422900	19419500	14858700	15353800	11634900	5728350	11592400	14350400	7507410	25470800	19606300	18037600	13642600	10506300	15070300	7942490	13405200
SGLFNVVPR	O24370,P400055325	2	43.9721	494.785	40766600	35274800	34232000	15977300	25088100	43542400	24064200	19173900	9966020	22258300	19676500	13660300	33063300	21415800	29140800	14638000	27898500	39793700	20368100	37413200
SYLPSQTPSGVSR	O24370,P400055325	2	31.875	689.854	58608800	53962100	16548400	18946100	43351600	26718500	22919400	17035100	10867800	23556700	23118200	13725300	43139200	39586000	32904000	30785200	31190700	45270600	23072100	40211500
VYGPPESEITK	O24370,P400055325,O49888	2	31.2688	610.316	55166300	51289500	26271100	18180400	44107600	25378900	26119300	14197200	8676860	24511300	19580800	12183500	49117600	26802800	34529600	31895200	30615800	43668200	14827600	36915000
DVLLFESPQLVQR	O24370,P400055325,O49888,Q96573	2	52.8322	772.432	18520400	21142300	16795600	16521900	31295900	17090700	15329400	13483000	6051340	13756700	18682900	12053600	26593000	21149000	13412400	11495300	15368600	24827900	10731700	20647200
LVTEWPLR	O24370,P400055325,O49888,Q96573	2	44.7054	507.292	25770960	23728790	25253280	11326620	12530480	29832900	16588430	20110350	8958200	18843720	12167350	9434940	28157430	16687180	25332700	10569710	27012070	36975968	21822130	33450020
STFVYVPR	O24370,P400055325,O49888,Q96573	2	36.9588	484.766	61759000	53543100	23325900	17205200	27953000	29583200	24167700	17770100	10474200	24599600	34133600	11404700	27846400	30375400	28168100	25584300	31322000	43781600	22795000	31962600
FDQEALPQNLISR	O24370,P400055325,O49888,Q96573,P400013721	2	44.9204	765.903	32466100	26748900	36651000	14676900	21083700	27804400	18867200	null	null	22009900	22558400	null	32459900	18394900	25460500	null	null	37714300	null	29155100
YTMEINALAR Oxidation (M) @0.0010000000.0	O24370,P400055325,O49888,Q96573,Q6X5R6	2	33.5474	599.303	46124300	39480100	19126900	11050900	22775600	27423100	17718800	16268500	6718280	16904600	13330500	8564150	32341100	26995000	23960500	20980500	13490300	26881900	12382280	23643300
QTLAGLNPYSIR	O24370,P400055325,O49888,Q96573,Q6X5R6,C0KKU8	2	43.8588	666.87	47150600	35708000	1997500	24056300	26349800	33196000	null	15535800	null	23761500	24125500	20910700	34719700	26278900	null	19496200	37553200	54867800	29183500	null
GLDDIGDLLGK	O24370,P400055325,Q6X5R6	2	51.0434	558.306	12540000	16836300	20763490	11700800	21828090	12164300	12042500	16392520	5913364	9562350	15177390	7934970	20329700	18366000	12712500	7958820	12222800	21186800	6350140	14772200
KLFILDYHDLLLPYVNK	O24370,P400055325,Q96573,O49888,P400013721,Q6X5R6	3	60.4975	702.07	2861270	541536	3111480	4202950	3061590	3316200	3887860	4490430	3238340	7419050	8375140	7261820	6169030	9290360	null	4569490	7427430	11983200	7810640	6456260
GLYDNTSDDQQDIAR	O49074	2	31.2074	855.886	138470336	144582896	150298208	59071232	237260992	129809296	145140800	92049616	41818960	143527008	111582800	53668700	191533296	130326656	135683104	156428704	162733392	178760096	111728400	226478304
FYWAPTR	O49074,P400019559,P400019560,P400019561,P400019558,F4IVZ7,Q8H172,Q941B7,P10896,P10896-2,Q0WLM1,P400033265,E5KXY0,Q40460,Q40565	2	39.8614	470.74	195072000	220191008	288302016	72104304	183796000	182239008	227363008	154903008	64968100	253995008	142542000	78803200	301432992	169466000	182252000	196684000	289823008	332617984	224278000	272251008
SFQCELVFRK	O49074,P400019559,P400019560,P400019561,P400033265,E5KXY0,Q40460,Q40565	3	38.1849	438.562	131021000	113190000	85748496	45541500	127393000	172760992	90489400	112940000	41552200	115424000	63086500	37301700	156251008	148378000	91681000	108324000	276384992	330720000	143890000	284696000
LDGFYIAPAFMDK	O49074,Q40460	2	60.1226	744.366	null	null	null	null	null	null	null	null	null	null	null	null	null	null	null	null	null	null	null	null
LDGFYIAPAFMDK Oxidation (M) @0.0000000000100.0	O49074,Q40460	2	53.7489	752.366	30230600	48006600	82786784	20596000	67655904	41558900	56132100	36676800	14320400	51745000	53613632	21390700	71269400	43274300	34970700	27519700	31977000	34566300	37263000	53489400
AQLWDTAGQER	O49513	2	33.722	637.812	5684060	4112410	3755840	2142270	3859660	4430110	1763210	4200990	1935900	5000100	5114960	1744810	4804810	5183380	4778080	4779530	8225890	5479940	6056450	5917550
AIADVANKNDINLR	O49954,P400052154	3	33.7096	509.616	83526896	63249900	38702400	15287600	42328400	59394800	29126100	40155800	21187300	32868500	19907100	6395610	40528800	41193800	48646000	53844900	71320200	69837000	52474300	68328400
IAILSANYMAK	O49954,P400052154	2	47.1895	597.832	null	null	null	null	null	null	null	null	null	1480700	null	null	null	null	null	null	null	null	null	null
VDNVYGDR	O49954,P400052154,E0X585,Q0WV94,O80988,Q9SCA3,Q93Z12,Q94B78,B9JFK7	2	20.7396	469.223	10527700	10655900	7346836	2512500	12036879	6258020	4978680	8695420	3125910	3311200	4076920	813637	6146960	4612600	5140730	3302310	4973480	8576850	5463560	8002950
IVAVGTDAK	O49954,P400052154,Q0WV94,O80988,E0X585	2	21.668	437.256	42602800	45279200	19870200	5786620	31901200	29197700	16141000	27373000	11799700	13762400	9764930	2430270	23632700	19870500	20411200	21770100	25300800	33218100	20418100	28511500
TALSDNGLDGLFLGGNYVSGVALGR	O64384,PGSC0003DMP400002073,PGSC0003DMP400002072,PGSC0003DMP400002074	2	62.405	1233.64	5032460	5004610	7500970	3335770	6838020	2166110	1128800	3857480	1709030	5282200	5119750	1606610	5458040	null	null	1923760	3709450	5409870	4774450	5615940
GQTVGSFR	O64384,PGSC0003DMP400002073,PGSC0003DMP400002074	2	23.5902	426.223	13286800	14041400	8988530	7963830	16800200	13388700	7197390	12176200	5593970	10975600	7677590	3128950	13325000	10067400	10418200	null	9439180	14426288	13637500	null
GGYLLTYETPEGVVSLR	O64384,PGSC0003DMP400002073,PGSC0003DMP400002074,PGSC0003DMP400002072	2	52.94	927.49	16314100	19915300	21318700	15205100	31405100	18980100	13721400	18722800	8641580	20321400	19701900	10536300	25507700	20700500	17540000	14027100	19691900	31812300	22455100	26352000
TESQLVEAVDR	O64384,PGSC0003DMP400002073,PGSC0003DMP400002074,PGSC0003DMP400002072	2	34.2998	623.82	38087300	29993400	19767500	9631090	19484200	29520200	14594500	17211200	7546020	23026800	19733700	7358510	28181800	16721800	12227100	22334400	15605900	24539000	22835200	23244600
VLLLNYIGGATNTEIVSK	O64384,˛,PGSC0003DMP400002074,PGSC0003DMP400002072	2	54.9788	953.043	35832100	33331400	27913200	18516300	24929800	20809100	14998900	17852800	12194800	28114000	28833700	12579000	36047500	25883600	21380100	14521900	33790600	40481900	31534800	34080300
AGFGAIGLRPSPPGYEESVEQFVR	O64384,PGSC0003DMP400002073,PGSC0003DMP400002075	3	52.6681	855.107	38689100	51522300	45081100	32978300	83112600	53250800	33685400	41997000	22971400	44816600	55314500	26811500	56475200	42442500	41852700	29774300	57779200	63677600	67337104	63717100
LEQTGGSIIGGTFK	O64384,PGSC0003DMP400002073,PGSC0003DMP400002075,PGSC0003DMP400002074	2	39.7916	704.381	31316700	26080800	25207100	11362400	23589400	21095900	12922700	16402300	8717180	23562300	20176200	8418870	29702900	17744500	21661200	18287300	24424300	30541100	28437200	28973700
AGGNITTVER	O64384,PGSC0003DMP400002073,PGSC0003DMP400002075,Q9SAX9,Q9SBI4,O24163	2	22.2596	509.271	28495900	30819700	11596800	14082200	26225300	24654600	12418700	18568600	7819020	17060100	13179200	4424220	23905600	15517400	23018600	21823100	17891400	15895700	21933100	27899900
LTDLPFFDLMSIPGK Oxidation (M) @0.000000000100000.0	O64384,PGSC0003DMP400002073,PGSC0003DMP400002075,Q9SBI4	2	61.0454	855.448	31374200	23142400	38269900	23312600	28633900	22476500	19625300	28359800	11408500	25345900	28143700	12038900	35203500	20120600	22104400	16904400	20499200	24895200	23529600	25558400
GPLENLADHLADPVNNNAWAYATNFVPGK	O64446,O64450,O64448,P12469,P27493,P27495,O64447,O64442,Q41424,O64445,P400014557	3	61.9797	1036.85	256724800	127604032	133498904	111968320	207164496	111811904	132974304	227829792	155229824	126644064	173815104	155655392	139839504	222366512	113126000	75272152	185915696	464742592	426204000	259157088
ISLIEVKTCNLAK	O80940	2	60.1347	744.923	188741600	207751296	151230896	147018224	211078208	183251808	161915744	211946304	114885800	137479008	247228304	143282800	232404960	211200048	173574816	116664904	130100400	174783616	186089216	218263312
KLASLADLFVNDAFGTAHR	O81394	3	56.7286	682.701	3413070	2036980	8882920	1326580	11069900	5525520	6750460	3514040	1884500	11763300	null	5252030	9199390	7145160	3008560	4863170	16530300	16860700	10836500	13179500
LASLADLFVNDAFGTAHR	O81394	3	60.6343	640.002	10631900	9499430	43388100	6957930	20756100	18292500	24483000	15333700	7232300	35621100	19255300	15712800	27573900	24858800	13325800	10322900	43863400	41092600	30482900	33934300
IGVIESLLEK	O81394,B2BEF8,B2BEF9,B2BEG1,B2BEG6,B2BEG9,B2BEH1,B2BEH8,Q4KQW8,Q4KQW9,Q4KQX9,Q4KQY8,Q30GV2,Q30GV8,Q30GW2,B2BEG0,Q2XPV6,P400038230,E5LLE7,Q2VCK2,Q42962,Q2V9C6,P400038231,Q2V9B3,Q42961,Q9LD57,F4I3L1,P50318	2	51.7923	550.834	36927700	67623200	99412400	21670000	136863008	74887400	100522000	65897300	18081700	78999296	55396600	36867600	113673000	54875800	40723300	40363100	72280600	61024500	57169900	66298400
FATGTEAIAK	O81394,Q2V9B3	2	27.2613	504.767	34570820	45909620	35722300	9476260	58258400	47116408	55056420	36790232	12310600	39420112	14149500	9391190	59893800	33428030	16174860	20556580	26882690	45804000	24027000	28549410
TVIWNGPMGVFEFDKFATGTEAIAK	O81394,Q2V9B3	3	65.8516	910.46	null	null	null	null	null	null	null	null	null	null	null	null	null	null	null	null	null	null	null	null
TVIWNGPMGVFEFDKFATGTEAIAK Oxidation (M) @0.0000000100000000000000000.0	O81394,Q2V9B3	3	58.5176	915.796	12389860	11816800	23637000	6354360	21038900	15824900	13623800	9896360	5262520	19315900	7285050	7462630	21575800	19601500	10555139	13215200	35924660	37624320	18624400	22934700
CDILLLGGGMIFTFYK Oxidation (M) @0.0000000001000000.0	O81394,Q2V9B3,F4I3L1,P50318,Q2XPV6,P400038230,Q42961,E5LLE7,Q9LD57	2	67.8864	932.472	null	null	null	null	null	null	null	null	null	null	null	null	null	null	null	null	null	null	null	null
ELDYLVGAVSTPK	O81394,Q2V9B3,Q2XPV6,P400038230	2	45.4482	696.378	107947000	140240000	233744992	46693000	116290000	193256992	175425184	148490000	32843200	145688000	82898600	59597700	135644000	86681200	98215400	86474600	180854000	174220000	122444000	145511008
LVDSLPEGGVLLLENVR	O81394,Q2V9B3,Q2XPV6,P400038230	2	58.9285	912.023	179284000	177542000	306619968	87332896	316696352	197055136	223556064	146334000	63662100	209738000	94751600	109489000	203239664	197236784	109258000	139474496	264397376	243549280	187223456	191074672
TFNDALDTTK	O81394,Q2V9B3,Q2XPV6,P400038230,Q42961,E5LLE7	2	30.183	563.277	147620000	186620000	150392992	44498300	241296000	212476992	178160992	137735008	36514300	146912000	67822000	45016600	214922000	132650000	109617000	167476992	202550000	198607008	119986000	178619008
RPFAAIVGGSK	O81394,Q2XPV6,P400038230,E5LLE7,F4I3L1,P50318,Q2V9B3,Q42961,Q9LD57	2	30.2945	551.824	92300104	104206000	63019800	20740700	133113000	124028000	108723000	80897800	20208500	90189504	35277200	26239800	121726000	57323800	68924400	114464000	125227000	140159008	87292304	137952992
FLKPSVAGFLLQK	O81394,Q2XPV6,P400038230,E5LLE7,Q2V9B3,Q42961,Q9LD57,F4I3L1,P50318	2	49.1581	724.441	30599700	37456600	62782500	10994700	78842096	52957100	62338900	45894500	10952500	49649900	36487900	23510400	88304000	48171600	32291236	33667000	74337200	63676800	42823100	61150000
SVGDLSSSDLK	O81394,Q2XPV6,P400038230,P400038229	2	30.5423	554.282	72067696	85985104	73896600	19563500	85214896	104311000	92241504	67594400	20084600	82444304	35549000	22572200	99434400	38148300	52781000	78505104	69370800	97015200	66683900	87064096
IVPASAIPDGWMGLDIGPDSIK	O81394,Q2XPV6,P400038230,Q2V9B3	2	64.85	1126.59	null	null	null	null	null	null	null	null	null	null	null	null	null	null	null	null	null	null	null	null
IVPASAIPDGWMGLDIGPDSIK Oxidation (M) @0.0000000000010000000000.0	O81394,Q2XPV6,P400038230,Q2V9B3	2	57.6265	1134.59	61528700	57391800	103267000	28847400	85046000	53234600	71051328	32398600	13837100	55951672	31191700	21511000	76005000	50301300	33859300	32589330	52758300	54824100	35010400	54335100
LVDSLPEGGVLLLENVR	O81394,Q2XPV6,P400038230,Q2V9B3	3	59.489	608.351	30331500	31267200	48374400	13005500	59936500	40293600	36573500	29744700	11456900	38037400	17215900	17710100	44292900	35776100	null	25379600	42972600	61037600	32150500	35436100
ADLNVPLDDAQNITDDTR	O81394,Q2XPV6,P400038230,Q2V9B3,P400038229	2	45.1046	993.479	123300000	143860000	259526000	55031800	135672000	147922000	197384992	138306000	37544400	149606000	92870096	63735500	141296000	99392200	118048000	102477000	189292992	161070000	123887000	161112992
VGVASVMSHISTGGGASLELLEGK	O81394,Q2XPV6,P400038230,Q42961,E5LLE7,Q2V9B3	3	58.4064	767.071	null	null	null	null	null	null	null	null	null	null	null	null	null	null	null	null	null	null	null	null
TVIWNGPMGVFEFDK	O81394,Q2XPV6,P400038230,Q42961,E5LLE7,Q42962,Q2V9B3	2	64.3291	870.427	null	null	null	null	null	null	null	null	null	null	null	null	null	null	null	null	null	null	null	null
LSELLGIQVVK	O81394,Q42961,Q2XPV6,P400038230,E5LLE7	2	48.6978	599.877	94436200	110347000	185855008	49353700	201891008	123887000	150743008	110786000	34768400	124615000	66151800	64598000	193812992	126561000	97792400	91511296	183904000	182840992	110828000	120153000
GVSLLLPSDVVIADK	O81394,Q42961,Q2XPV6,P400038230,Q2V9B3,E5LLE7	2	53.4919	763.449	58278260	94396224	132293264	38625600	115538944	91554400	138447808	58751600	27236800	114632000	54807900	49112800	115940520	77267872	43539600	58485968	88554928	96764000	74983000	56530700
FLKPSVAGFLLQK	O81394,Q42961,Q2XPV6,P400038230,Q2V9B3,E5LLE7,F4I3L1,P50318,Q9LD57	3	49.1885	483.296	111522000	171216992	216539008	49614200	270216992	171260000	209579008	147698000	43133700	158810000	115727000	79996896	277656992	158802000	104232000	101047000	236367008	244244000	161347008	217046000
LDVLLGGDDGSLAFIPGNFSVSAGEK	P00296	2	62.6592	1289.66	121470000	72893000	73720200	41794500	144275008	78543400	57059700	98542096	60836000	88459504	36548200	8431220	60090500	46973700	53847700	91634200	143123008	111171000	164290000	83478000
LDVLLGGDDGSLAFIPGNFSVSAGEK	P00296	3	62.6176	860.11	60574300	35733300	38282200	53871700	97494000	63592700	31585400	75863296	38542500	35670000	21727360	4626940	57403800	22353000	27321500	77802800	88382704	69192896	106501000	48067400
ISMAEEDLLNAAGETYSVTLSEK	P00296,P400063724	2	60.0545	1236.1	null	1874250	2618880	null	867410	null	null	null	971639	2275630	null	null	null	null	null	null	3278580	3655220	1313180	2120160
ISMAEEDLLNAAGETYSVTLSEK	P00296,P400063724	3	61.6265	824.402	null	null	1510830	null	null	null	null	null	null	2210040	null	null	null	null	null	null	null	null	null	null
ISMAEEDLLNAAGETYSVTLSEK Oxidation (M) @0.00100000000000000000000.0	P00296,P400063724	2	57.5094	1244.1	523536000	153103008	317024992	289014016	607668990	443940000	339664000	345620000	291312000	310747008	390678976	52645600	395868000	253056000	242492000	268779008	363275008	458956992	481081984	533481984
ISMAEEDLLNAAGETYSVTLSEK Oxidation (M) @0.00100000000000000000000.0	P00296,P400063724	3	57.6508	829.736	653766140	248447680	159652912	266705472	540999360	803157820	379956288	471466752	325452480	270444128	539475260	59256200	638927680	130234712	236286000	337846976	406789344	469135424	535709024	602986620
NNAGFPHNVVFDEDEIPAGVDASK	P00296,P400063724,P17340,P35477,P00297	3	46.9991	848.07	156962000	133215000	187367008	101097000	191280992	310923008	164548000	169418000	191556992	238176000	337699008	35857700	227834000	146632992	204040992	183555008	359100000	478788000	493481984	675107970
GTYTFYCAPHQGAGMVGK Oxidation (M) @0.000000000000001000.0	P00296,P400063724,P35477,Q6RUN5,P35476,P17340	3	33.7446	654.297	212036992	179026000	125451000	102822000	308726016	445608000	239095008	325715008	275563008	318776000	362672992	37998100	289897984	176043008	276388992	209292992	447036992	533960000	555150020	788748990
GTYTFYCAPHQGAGMVGK	P00296,P400063724,Q6RUN5,P17340,P35477,P35476	3	38.3322	648.964	null	null	1240790	null	null	null	null	null	932100	4043470	2865920	null	null	null	null	null	5230990	9549790	3654490	4575640
GTYTFYCAPHQGAGMVGK Oxidation (M) @0.000000000000001000.0	P00296,P400063724,Q6RUN5,P17340,P35477,P35476	2	33.7432	980.942	40619600	35429000	7792950	7960180	32571700	70922496	40786900	48977300	34480300	45247500	34151800	3079360	39419300	27920200	54212800	36235300	78561400	98248200	98174600	153991008
GKGVYQYVDK	P06183,Q40163,P400038514	2	26.4938	578.805	51311200	27816300	10082700	19408000	46614500	54363000	24641500	45240300	25297700	26775400	34002300	15351500	25158800	63981500	61214200	36377000	38395800	60090700	54124200	123225000
GVYQYVDK	P06183,Q40163,P400038514	2	29.5756	486.247	552966020	430431008	134347008	225300000	451071008	546035010	304644000	505352000	308775008	280033984	317439008	171879008	201940000	647848000	661800000	449438016	367384000	704195010	446111008	1162450050
LKTDKPYGINGSMALR Oxidation (M) @0.0000000000001000.0	P06183,Q40163,P400038514	3	28.4708	593.988	86808304	60453600	14501600	29427100	91667600	102954000	48927100	81663600	42954900	40966000	48947300	20946100	44264600	97995400	89500000	61840000	53616600	112604000	60681200	141536000
LKTDKPYGINGSMALR Oxidation (M) @0.0000000000001000.0	P06183,Q40163,P400038514	4	28.4553	445.742	118192000	101206000	19908400	35513200	124506000	143524992	63264400	106919000	58282100	53295400	68276304	29109700	58628900	125145000	128070000	76768200	60779100	195143008	66247000	198748992
TDKPYGINGSMALR	P06183,Q40163,P400038514	3	38.6689	508.262	null	null	null	null	null	null	null	null	null	1546930	1512620	null	null	null	null	null	null	null	null	null
TDKPYGINGSMALR Oxidation (M) @0.00000000001000.0	P06183,Q40163,P400038514	2	29.1614	769.888	94024096	65475100	11102700	20587400	91506304	100156000	52414100	76353904	40041400	43018100	37690300	14893800	40182200	103279000	115419000	84805296	66890700	122914000	60392200	212864992
TDKPYGINGSMALR Oxidation (M) @0.00000000001000.0	P06183,Q40163,P400038514	3	29.1859	513.594	413187008	327272992	82323296	183736992	427569984	490366016	229046000	372446016	206746000	194616000	274435008	118325000	201167008	507868992	538188030	364836000	300856000	569318020	327305984	925790020
YLGPFSGESPSYLTGEFPGDYGWDTAGLSADPETFAK	P07369,P12470,P27492,O64444,O64443,O64446,O64450,P12469,P27493,P27495,O64447,B8XLF1,Q41421,P400014555,P400014556,P400015466,P400064602,P07370,Q41426,P400015464,Q41423,P400029202,P27496,P400015465,P400014577,Q41424,P400014558,Q41422,P400014557,Q41425	2	68.0093	1965.39	null	null	null	null	null	null	null	null	null	null	null	null	null	null	null	null	null	null	null	null
YLGPFSGESPSYLTGEFPGDYGWDTAGLSADPETFAK	P07369,P12470,P27492,O64444,O64443,O64446,O64450,P12469,P27493,P27495,O64447,B8XLF1,Q41421,P400014555,P400014556,P400015466,P400064602,P07370,Q41426,P400015464,Q41423,P400029202,P27496,P400015465,P400014577,Q41424,P400014558,Q41422,P400014557,Q41425	3	67.1584	1310.6	1581964290	1289855100	733653700	916626240	1332347390	1008797950	841683200	1271371520	950118980	729095940	441192992	758843200	990603390	1571473920	63381700	892198980	1271981570	1581180290	1424125700	1208863490
YLGPFSGESPSYLTGEFPGDYGWDTAGLSADPETFAK	P07369,P400015464,B8XLF1,Q41421,P400014555,P400014556,P400015466,P400064602,Q41426,P400015465,P400014558,P400029202,P27496,O64444,O64443,P07370,Q41422,O64446,O64450,P12469,P27493,P27495,O64447,Q41424,P400014577,P12470,P27492,Q41423,P400014557,Q41425	4	64.4569	983.203	84000304	87899696	43205700	240416000	118009000	111769000	52396500	145084000	113160000	33391100	22250900	null	104351200	89381400	null	45466100	123288000	229163008	199754000	112503000
AKPASSGSPWYGPDR	P07369,P400023811,P400023740,P400023743,P400023744,P400023742,Q2XTE0,P400023745,P400023738,P400023748	3	28.8354	525.925	7149669900	6222289900	2657380100	3752039940	7878539800	8085150200	5493969900	8478669800	4551929900	4450970100	5738670100	3920049920	6417509900	7730769900	null	5558349800	5571429900	9829170200	5459220000	7757199900
LSPSSSEITGNGR	P07369,Q2XTE0,P400023738,P400023811,P400013055,Q41447,P400023743,P400023744,P400023739,P400023748	2	26.2001	652.828	21261300	18575100	5663460	7452030	17443400	19096800	11563500	10263000	7594400	9693940	10665300	6431430	21162400	17009800	20873400	17477100	12056300	22879500	14853400	22516500
IAGGPLGEVVDPLYPGGSFDPLGLADDPEAFAELK	P07369,Q2XTE0,P400023743,P400023745,P400023744,P400023742,P400023739,P400023738,P400023812,P400023813,P400023740,P400023741,P400013055,Q41447,B8XLF1,Q41421,P400014555,P400014556,P400015466,P400064602,P400029202,P400014558,P400015465,P400015464	4	71.0409	882.451	199114704	324015808	59359400	619987970	526211296	218275488	75007696	403587136	120309344	142836336	22905500	128259696	17903900	222156000	28650700	null	175058032	616530430	534214016	116005000
ELEVIHCR	P07369,Q2XTE0,P400023745,P400023738,P12470,P27492,P27491,O64449,O64444,O64443,O64446,O64450,O64448,P12469,P27493,P27495,O64447,O64442,O64445,P400013055,Q41447,P400014558,P400023743,P400023744,P400029202,P27496,B8XLF1,Q41421,P400014555,P400014556,P400015466,P400064602,P07370,Q41426,Q41423,P400015464,P400010908,P14278,Q84TM7,P27494,P400015465,P400014577,Q41424,P400023739,P14279,PGSC0003DMP400007654…	2	35.0967	528.269	21819900	2213310720	420825600	18887300	2059304700	2035332860	1654328450	2015870340	1580666110	1722190590	1355220480	842908420	2125017470	2252301570	2491360770	1099537920	2127473410	3607574270	2903483390	23981500
NRELEVIHCR	P07369,Q2XTE0,P400023745,P400023738,P400023748,P400013055,P27491,O64449,Q41447,Q84TM7,P14278,P27494,P400010908,B8XLF1,Q41421,P400014555,P400014556,P400015466,P400064602,P07370,Q41426,P400015464,P400023743,P400023744,P27492,O64443,O64444,P12470,O64446,O64450,O64448,P27493,P27495,O64447,P12469,O64442,P400029202,P27496,P400015465,P400014577,Q41423,P400014558,P14279,PGSC0003DMP400007654,Q41424,P40001…	2	24.1961	663.342	229735008	196438000	5556260	34439200	204340992	275936000	158899008	204506000	139316992	164864992	47008400	33266900	216628000	310567008	484083008	252708000	420980000	714612990	605878980	1058329980
LAMFSMFGFFVQAIVTGK Oxidation (M) @0.001000000000000000.0	P07369,Q2XTE0,P400023745,Q39141,Q39142,P400023738,Q8LCZ4,Q9C5R6,C0Z391,Q9S7J7,Q9SHR7,Q9SYW9,Q9XF86,Q9XF87,P400023740,P14274,P14275,P27492,P27491,O64449,O64444,O64443,P10707,O64446,O64450,O64448,P12469,P27493,P27495,O64447,O64442,O64445,P400013055,Q41447,P400014558,P400023743,P400023744,P400023742,P400029202,P27496,B8XLF1,Q41421,P400014555,P400014556,P400015466,P400064602,P07370,Q41423,P400015464,…	2	69.4441	1005.51	8163300	4222040	7137850	3003800	5329580	3851100	2280580	5572360	2768370	6420600	3849250	1779880	3566670	5862490	null	null	4928220	4361480	6049710	5140760
FGEAVWFK	P07369,Q39141,Q39142,Q41447,C0Z391,Q9S7J7,Q9SHR7,Q9SYW9,Q9XF86,Q9XF87,Q7M1L1,Q2XTE0,P400023745,P400013055,P27491,P400023743,P400023742,P400023744,B8XLF1,Q41421,P400014555,P400014556,P400015466,P400064602,Q41426,P400015464,P07370,P400015465,O64444,P400014558,P400029202,P400014577,P14278,P400010908,Q84TM7,P27494,Q41424,P12469,O64448,Q41423,P400023739,P27496,P27492,O64443,P27493,P27495,O64446,O64447…	2	60.057	492.255	16790803500	15424148500	8335053300	8557109200	11602614300	16686596100	13207448600	15545233400	10489677800	9134060500	16961573900	10931107800	16265484300	18214580200	16925702100	8276837900	13179397100	21697314800	18187794400	19354253300
LAMFSMFGFFVQAIVTGK 2 Oxidation (M) @0.001001000000000000.0	P07369,Q39141,Q39142,Q8LCZ4,Q9C5R6,P400023812,P400023813,P400014554,C0Z391,Q9S7J7,Q9SHR7,Q9SYW9,Q9XF86,Q9XF87,P400023740,P14274,P14275,P400023741,Q2XTE0,P400023745,P400023738,P400013055,P27491,O64449,Q41447,Q84TM7,P14278,P27494,P400010908,B8XLF1,Q41421,P400014555,P400014556,P400015466,P400064602,P07370,P400015464,P400023743,P400023742,P400023744,P27492,O64443,O64444,P10707,O64446,O64450,O64448,P2…	2	76.0595	1013.51	null	null	null	null	null	null	null	null	null	null	null	null	null	null	null	null	null	null	null	null
IAGGPLGEVVDPLYPGGSFDPLGLAEDPEAFAELK	P07370,P14274,P14275,P400014577,P10707,Q41422,Q41425,P400014554,P14276,P14277	3	71.465	1180.94	861588990	944371010	192478000	229320304	894828990	313233984	160052000	378707008	181095008	352104992	36544700	57354100	160815008	761227390	89519800	null	719768000	866851010	443852992	140126000
IAGGPLGEVVDPLYPGGSFDPLGLAEDPEAFAELK	P07370,P14274,P14275,P400014577,P10707,Q41422,Q41425,P400014554,P14276,P14277	4	71.3724	885.955	20425800	36908000	4992850	null	4321700	24708400	8698290	42409100	4675000	37532800	1771060	4396300	null	13634900	null	null	26032600	67501600	10718400	4418710
AGFAGDDAPR	P0CJ46,P0CJ47,F1LIM0,F1LIM1,Q6F4H4,Q541W9,P30171,P30172,P30173,P53496,P81228,P81229,P93585,Q96482,Q96484,PGSC0003DMP400000868,P400041029,P400048248,P93371,Q0WL95,F4J8V9,B5M4V6,Q8LB94,B9DHA3,Q84W24,Q05214,P53492,P53494,P53497,P93373,P93375,P93376,P93584,Q96292,Q96293,PGSC0003DMP400007100,P400032139,P400033362,P400052766,Q2XTC1,P93372,Q96483,P93587,Q5KQU7,C7ENV6,P30170,P93374,P93586,Q96481,P4000156…	2	23.7825	488.729	31806500	19526000	14143100	13232000	23850700	25836100	10003600	20289700	9749950	10260200	10545500	5504200	18094100	12974900	13198500	12987800	22148500	19235000	14061100	16761100
DAYVGDEAQSK	P0CJ46,P0CJ47,F1LIM0,F1LIM1,Q6F4H4,Q541W9,P30171,P30172,P30173,P53496,P81228,P81229,P93585,Q96482,Q96484,PGSC0003DMP400000868,P400041029,P400048248,P93371,Q0WL95,F4J8V9,B5M4V6,Q8LB94,B9DHA3,Q84W24,Q05214,P53492,P53494,P53497,P93373,P93375,P93376,P93584,Q96292,Q96293,PGSC0003DMP400007100,P400032139,P400033362,P400052766,P93587,Q5KQU7,C7ENV6,P30170,P93374,P93586,Q96481,P400015683,P400051821,P400051…	2	22.6909	591.764	2458550	2028310	1062320	null	1453870	1459370	null	null	null	null	null	null	943446	null	null	null	null	1759170	1596120	null
DAYVGDEAQSKR	P0CJ46,P0CJ47,Q0WL95,F1LIM0,F1LIM1,F4J8V9,B5M4V6,Q6F4H4,Q8LB94,B9DHA3,Q84W24,Q541W9,Q05214,P30171,P30172,P30173,P53492,P53494,P53496,P53497,P81228,P81229,P93373,P93375,P93376,P93584,P93585,Q96292,Q96293,Q96482,Q96484,PGSC0003DMP400000868,PGSC0003DMP400007100,P400032139,P400033362,P400041029,P400048248,P400052766,P93371,Q5KQU7,C7ENV6,P30170,P93374,P93586,P93587,P400015683,P400051821,P400051822,Q93…	2	18.7641	669.818	3784070	2282580	1808890	1561360	4166880	3085010	1247090	3717710	1284450	1635330	2040270	842908	2264500	1697950	1619110	1187610	1905940	2608760	1767500	2846510
DAYVGDEAQSKR	P0CJ46,P0CJ47,Q0WL95,F1LIM0,F1LIM1,F4J8V9,B5M4V6,Q6F4H4,Q8LB94,B9DHA3,Q84W24,Q93ZL9,Q541W9,Q05214,P30169,P30171,P30172,P30173,P53492,P53494,P53496,P53497,P81228,P81229,P93373,P93375,P93376,P93584,P93585,Q96292,Q96293,Q96482,Q96484,PGSC0003DMP400000868,PGSC0003DMP400007100,P400032139,P400033362,P400041029,P400048248,P400052766,P400052767,P93371,E0A3C6,D5LXP0,Q5KQU7,C7ENV6,P30170,P93374,P93586,P935…	3	18.7625	446.881	4722210	4307430	949379	1302070	3854690	4616140	1340520	3446660	1097720	1187910	1343470	798720	3437690	1942760	3208940	2124460	4609350	6009280	2285260	3374970
GPIENLADHLADPVNNNAWAFATNFVPGK	P0CJ48,Q8VZ87,Q9C8S5,P04778	3	66.8677	1031.52	595474690	432777184	340710592	389655552	503642848	237588096	261841648	766242560	723336260	609197630	139397472	193947808	115675000	1021495940	216700736	328553792	926990270	1481532160	2031014660	161018592
WAMLGAAGIFIPELLTK Oxidation (M) @0.00100000000000000.0	P10708	2	69.3123	924.015	735389440	636854340	272138912	588191490	747690620	655432700	571082820	771887870	691652610	537641730	608797950	592704260	535524384	898119550	838750140	541924350	745128510	934539780	963840900	833814910
WAMLGAAGIFIPELLTK Oxidation (M) @0.00100000000000000.0	P10708	3	66.6343	616.346	37989600	73167168	18658550	120562104	64447808	63016100	40696736	77245960	57080800	53138504	57189000	57160700	22927200	57869520	41206200	38259632	57724500	102585000	98422744	54629780
WNQQAELVHCR	P10708	2	27.8829	720.844	29542700	28957400	null	4205320	19690300	25311400	18380300	27281500	26101200	22365400	8378700	7079090	20084400	30566600	29271900	8279120	55679100	89390200	18600400	62571700
WNQQAELVHCR	P10708	3	27.8262	480.899	139218000	171140000	11377400	38955100	114742000	118442000	94912304	157102000	183804992	121062000	87054304	72939400	100090000	165495008	129258000	43890100	258918000	474443008	168034000	399899008
RWADIIKPGCVNTDPIFPNNK	P10708,P400025334	3	47.2043	819.093	25657300	18011700	6054340	11186000	12887100	28799900	20634500	27898500	18760800	20125300	35445500	20543100	27227900	32644100	35809800	8685080	23121000	44757100	37695500	45168600
RWADIIKPGCVNTDPIFPNNK	P10708,P400025334	4	47.5944	614.572	null	24937400	null	16516700	17711000	35481300	16863400	null	null	16005500	30543200	null	34163700	null	32718000	null	29109100	59493100	44435000	47882700
WADIIKPGCVNTDPIFPNNK	P10708,P400025334	2	48.8998	1150.09	61062400	47641700	19422100	31561500	54112600	44799600	46654600	68543400	45808100	35898100	65870600	38501200	45719000	79269696	82207400	23350100	64382500	101986000	75927400	101909000
WADIIKPGCVNTDPIFPNNK	P10708,P400025334	3	49.0044	767.064	1619547010	1130285060	1010166020	1046404990	1753523970	1522432510	1511014910	1526486020	1226305020	1083097980	1764149120	1318764030	1964205060	1986661890	1892028930	1040531010	806659460	2515820030	2174640130	2824150020
LTGTDVGYPGGLWFDPLGWGSGSPAK	P10708,P400025334,Q9M320,Q9SYW8	2	66.5434	1318.15	224772992	192308992	85817200	125905000	168379008	171466000	161179008	191956992	254180000	166607008	124054000	140936992	143064000	256058000	264336000	143762000	267122000	249780000	328735008	201959008
LTGTDVGYPGGLWFDPLGWGSGSPAK	P10708,Q9M320,Q9SYW8,P400025334	3	66.579	879.103	45271300	80887800	18632100	115347000	66809700	81796400	43110800	80076896	78494000	62395400	41495200	64387100	41859400	68736496	61257000	56187600	82934000	120115000	124557000	54964300
WAMLAVPGIIVPEALGLGNWVK	P12360,P400040356	2	72.3326	1167.66	null	null	null	null	null	null	null	null	null	null	null	null	null	null	null	null	null	null	null	null
WAMLAVPGIIVPEALGLGNWVK Oxidation (M) @0.0010000000000000000000.0	P12360,P400040356	3	71.4894	784.108	13681900	65989000	11391430	22470700	20328000	18160700	16288080	23581800	16853050	5586580	7805590	6977310	9558530	49681700	3196510	null	14127300	22723400	46881700	1257430
WAMLAVPGIIVPEALGLGNWVK Oxidation (M) @0.0010000000000000000000.0	P12360,P400040356	2	72.2484	1175.65	null	null	null	null	null	null	null	null	null	null	null	null	null	null	null	null	null	null	null	null
KYPGGAFDPLGYSK	P12360,P400040356,A8MS75,Q01667,P400040595,Q40512	3	41.0161	500.591	498023008	542112000	328036000	344772992	489148000	692371010	554195970	498750016	411136992	372953984	542590980	360260000	602451970	529507008	748262980	495316992	527217984	837697020	812014980	1027120000
DPAKFEELK	P12360,P400040356,P400040595	2	28.9371	538.786	null	405243008	174184992	255151008	542929980	556574020	428412992	634868990	317913984	305323008	419332000	238862000	448134016	593574980	564817020	482623008	340510016	607672000	404188000	542163970
YPGGAFDPLGYSKDPAK	P12360,P400040356,P400040595	3	42.377	594.969	225838208	170005696	87095200	111070704	143763504	226851504	174412000	254211200	129248568	112850504	152911392	119683472	176532096	174638896	159356800	158823696	148048992	264411296	230469296	306101888
ESELIHCR	P12360,P400040356,P400040595,A8MS75,Q01667,Q40512,F4JE43,F4JE46	2	21.1388	522.251	5087440	6611670	1216330	1211120	5041820	5234790	5077940	7238560	5216400	4336560	4275600	2159330	6471610	5793790	6308850	2719380	4768460	11712900	8943500	13185500
FEELKVK	P12360,P400040356,P400040595,Q40512	2	24.7223	446.762	24425100	12448200	1787810	7433110	18597900	24598400	8486190	16230400	11148000	9059830	9387700	7345290	12432900	34325600	42582000	29995500	24906400	42752600	26323500	59173400
KYPGGAFDPLGYSK	P12360,P400040356,P400040595,Q40512,A8MS75,Q01667	2	41.1665	750.383	233283008	223468000	119717000	86413696	137718000	291812992	237335008	195344992	146744000	152383008	160464992	105572000	247224000	210643008	373670016	238846000	241620000	361168992	363508992	475985984
YPGGAFDPLGYSK	P12360,P400040356,P400040595,Q40512,A8MS75,Q01667	2	45.7105	686.336	591069310	552838020	383916992	326561984	332052992	703502020	638833020	848892030	420969984	380612000	693561020	378060992	595945980	546201980	757454020	361137120	449643008	721712000	738480000	786833980
YKESELIHCR	P12360,P400040356,P400040595,Q40512,A8MS75,Q01667,F4JE43,F4JE46	2	24.4942	667.831	null	26768800	2232860	16997100	28188600	34753300	22583000	32299100	24242500	24250300	13433200	7606530	29441400	41591300	57282700	27224200	47307400	80577696	74929104	117170000
LAMFSMFGFFVQALVTGK 2 Oxidation (M) @0.001001000000000000.0	P12470	3	72.2468	676.011	null	null	null	null	null	null	null	null	null	null	null	null	null	null	null	null	null	null	null	null
LAMFSMFGFFVQALVTGK 2 Oxidation (M) @0.001001000000000000.0	P12470	2	72.2906	1013.52	553793020	1000000000	201482592	187818208	260032992	82395600	61791800	183592000	77745104	61628820	33393450	28575400	49353660	258327504	22113600	null	89806496	403848992	205832896	53027100
NGRLAMFSMFGFFVQALVTGK 2 Oxidation (M) @0.000001001000000000000.0	P12470	3	70.6456	785.067	null	null	null	null	null	null	null	null	null	null	null	null	null	null	null	null	null	null	null	null
GPLENLADHLADPVNNNAWSYATNFVPGK	P12470,P27492,O64444,O64443,P10707,Q41423,P400015465,P400014577,P400014558,P400029202,P27496,Q41425	3	62.238	1042.18	832809660	555297790	583815550	741494980	956418940	588798340	609761980	1055533180	843353790	762530820	378484416	583713660	559436100	1110809730	650191550	737649600	1019592320	1435531520	1376837890	598878210
GPLENLADHIADPVNNNAWAFATNFVPGK	P14276,P14277	4	65.8415	773.89	15690200	16710200	10955800	40729200	28071400	10285000	5809940	55709000	25564200	17402010	null	9169100	2279270	null	4881900	12168660	47859700	100005000	118570000	null
GPIENLSDHINDPVANNAWAYATNFVPGK	P14278,P400010908	3	58.3978	1042.18	313292000	200427008	199110000	239072992	302878016	229024992	232280992	270108992	344731008	273780000	333268000	336147104	300361984	464665984	294251008	190527008	449588992	647324030	550958980	512928000
IYPGGAFDPLGLADDPEAFAELK	P14278,P400010908,Q84TM7,P27494,P14279,PGSC0003DMP400007654,Q41449	2	68.0766	1203.6	4938308100	3911204350	2540633090	3264387580	4092798460	3398163710	3653685760	4785932800	3256882690	2820288000	3586021630	3096132860	3391843070	4207968510	4046374140	2486700030	2836666880	3742073600	4045580800	4175451650
IYPGGAFDPLGLADDPEAFAELK	P14278,P400010908,Q84TM7,P27494,P14279,PGSC0003DMP400007654,Q41449	3	68.0348	802.738	659130880	666253380	311351360	1873599100	1255884160	1031868480	662965500	1277388160	839243260	455303264	650042370	768819780	1026021120	718448000	524556800	595330560	615416190	1144833150	1113201920	919681020
SAPQSIWYGEDRPK	P14278,P400010908,Q84TM7,P27494,P14279,PGSC0003DMP400007654,Q41449	3	34.3138	545.273	5050469900	3983069950	1359160060	1968530050	2636440060	4042939900	2959389950	3213969920	2883180030	2402020100	3166510080	2316009980	3438360060	4451380200	3697750020	3361179900	3490409980	5360200200	4424920100	null
VGGGPLGEGLDK	P14278,P400010908,Q84TM7,P27494,P14279,PGSC0003DMP400007654,Q41449	2	46.4512	549.795	11006384100	8613225500	1780472830	3270813700	4663269900	5732867100	6128508900	8215556600	4163773700	4206822400	4824694800	3352209920	7221519900	8153807400	8056800300	6715599900	5332626400	8506244600	7916122600	10098534400
WAMLGALGCVFPEILSK Oxidation (M) @0.00100000000000000.0	P14278,P400010908,Q84TM7,P27494,P14279,PGSC0003DMP400007654,Q41449	2	68.7199	954.496	922942140	755362300	521118784	979022340	1110934530	941922050	943124420	1466654980	1118504450	703930300	903251840	725817470	816497220	1069868540	945331580	358609856	919290940	1312236800	1344514180	802946300
WAMLGALGCVFPEILSK Oxidation (M) @0.00100000000000000.0	P14278,P400010908,Q84TM7,P27494,P14279,PGSC0003DMP400007654,Q41449	3	64.6719	636.667	16495200	17968700	11614300	93682800	23033400	25155900	9374660	32936200	26823800	4173180	null	12760500	34923600	17840100	15265200	3562530	33392700	63818200	60402500	23442900
GPIENLSDHIADPVANNAWAYATNFVPGK	P14279,PGSC0003DMP400007654,Q41449	3	59.0638	1027.85	123109152	79092696	47266928	71841808	88024232	76288512	78343808	140731008	133416736	108214144	53303340	89966824	81356352	179731984	6084410	71651464	189473392	297027936	303984480	167387504
GPIENLSDHIADPVANNAWAYATNFVPGK	P14279,PGSC0003DMP400007654,Q41449	4	61.4811	771.135	null	null	null	null	null	null	4738330	8433670	8336700	5603020	null	null	null	null	null	null	null	null	15856900	null
NGVTFGEAVWFK	P14279,PGSC0003DMP400007654,Q41449	2	53.2935	677.846	298923008	293671008	181688000	235286000	228474000	294334016	304662016	315127008	274115008	225912992	344124000	264806000	332127008	488884992	317278016	212802000	290673984	378779008	445992000	320479008
VVDLLAPYQR	P17614,O82722,P400053197,Q9SAQ0,P400010643,F4KCG2,Q8H135,Q541W2,P83483,P83484,Q9C5A9,P400053275	2	44.8404	587.337	50623400	48435100	63287100	18487300	24478000	43531100	23956600	56239200	19438700	32745500	21366000	12866000	32653400	24087100	36873800	28783200	45250300	56582200	42182400	46250800
EMIESGVIK Oxidation (M) @0.010000000.0	P17614,O82722,P400053197,Q9SAQ0,P400010643,Q8H135,Q9C5A9,P400053275,O82721,F4KCG2,Q541W2,P83483,P83484,Q42052	2	28.1741	511.266	18185100	16097300	4548280	2760860	null	9576650	6207040	10251600	3429350	null	3271280	1662680	9567780	null	4063470	5286670	null	null	3650550	null
TVLIMELINNVAK Oxidation (M) @0.0000100000000.0	P17614,O82722,P400053197,Q9SAQ0,Q9ZR78,P400010643,F4KCG2,Q8H135,Q9C5A9,Q541W2,P83483,P83484,P400053275,Q42052	2	58.3518	737.423	50113200	35493700	50538340	21694400	44743600	25581210	21137090	28840800	16032340	25847570	28111000	16137320	36357000	34557600	23213310	27026800	37339800	46043500	34783300	33381300
VGETVDLVGLR	P17745,B9DHZ8	2	42.1871	579.333	24023800	25455100	53788600	8563990	40417500	35563200	34022100	33782800	10726700	31671500	11102900	8830060	34500000	14876900	9959940	15739700	31650300	31903500	20280600	27026300
LLAEFENAR	P21238,Q56WB8,Q8L5U4	2	35.7187	531.785	49170900	65604900	75750000	11981000	49532900	62769700	35211500	30881600	7518360	84222704	30357600	9955930	77173400	34635500	43661800	67637600	96418096	53581600	53765400	55687700
AYVDNLNK	P22302,PGSC0003DMP400009317,PGSC0003DMP400009318,A0A037XXK7,A0A083ZJN5,G6XUC7,M8B3F5,W8FGT8,Q6X1D0,Q7YK44,B2CR62,P400047960,P400047965,P400047959,P400047963,P400047966,A0A024J1Q9,A0A067U8D8,W1LCK6,F7UBR0	2	25.4087	468.744	null	null	14800100	9030930	34645500	29525300	26984500	30412900	7888820	null	null	8838300	27115800	null	null	26893400	null	null	16758200	30998100
GGSTGYDNAVALPAGGR	P23322,PGSC0003DMP400004990,E5LP98,P26320,C5MR70,P400017746,Q40459,Q84QE8,Q58H58,Q9S841,P23321	3	33.3307	521.593	165660000	162700000	1991380	1899900	2200360	53203200	44375400	35505600	14404600	27587000	6669420	2956280	62887900	32566800	37311800	66144300	45105800	119674000	77356800	100557000
GTGTANQCPTIEGGVGSFAFKPGK	P23322,PGSC0003DMP400004990,E5LP98,Q157M6	2	42.6672	1191.09	186679008	132745000	52136000	41102100	42092600	89551696	95953504	187347008	61063300	79431800	83620096	40798700	95739904	86633600	113844000	53042100	112400000	152476992	135340992	169848000
GTGTANQCPTIEGGVGSFAFKPGK	P23322,PGSC0003DMP400004990,E5LP98,Q157M6	3	42.5193	794.394	5045749800	4253400060	2009840000	2633200130	3034350080	3969201150	3249090050	5572230100	2587219970	3052600060	4034959870	2341222660	3992359940	3162500100	3324339970	1795699970	3692529920	5230333400	4551860200	5254640100
LTYDEIQSK	P23322,PGSC0003DMP400004990,E5LP98,Q157M6,Q9S841,P23321	2	29.5332	548.782	553776000	505931008	201656992	244004992	438163008	503212992	383044992	535924992	264550000	299691008	363616992	216468992	338872992	436356992	502008000	373303008	281217984	533852992	302049984	516542016
RLTYDEIQSK	P23322,PGSC0003DMP400004990,E5LP98,Q157M6,Q9S841,P23321	2	25.1781	626.832	3344009220	2461688320	947438660	1319854720	2901755140	2930731520	1914181380	2982074620	1542183300	1718188930	1813569540	1146428930	2281327620	2452562180	2902697980	1736027010	2096472830	3172358660	2558427390	3749978370
RLTYDEIQSK	P23322,PGSC0003DMP400004990,E5LP98,Q157M6,Q9S841,P23321	3	25.2627	418.223	1246617340	1371276800	221886512	283534784	724095490	1234174980	671683460	730341250	304926592	487598976	379649216	228350208	1000483070	996563580	1043635390	637305470	788505470	1246871040	676026750	1222815740
ITLSVTQSKPETGEVIGVFESIQPSDTDLGAK	P23322,PGSC0003DMP400004990,E5LP98,Q40459	3	55.4896	1116.25	2274599680	1385619970	1192640000	1450273790	1835699970	1317989630	1283730050	1457650050	1182349060	1120669950	1692579970	1319437060	1611766140	1811806850	1426190340	1086055420	1351699970	1702313730	1730985980	1967820030
ITLSVTQSKPETGEVIGVFESIQPSDTDLGAK	P23322,PGSC0003DMP400004990,E5LP98,Q40459	4	56.4132	837.436	340910112	205162208	129094200	133394000	400657888	312111616	219254304	210864192	181570896	143911296	304954496	160904896	318376320	260419392	183334592	123035600	264263296	376578912	330555616	359923200
QLVASGKPESFSGEFLVPSYR	P23322,PGSC0003DMP400004990,E5LP98,Q40459,Q84QE8,Q58H58	2	48.2023	1149.6	322472992	237658000	153803008	143360000	225024992	226184000	208502000	311452992	158856000	169964000	301806016	177243008	267030000	307448000	312695008	131337000	218988992	319718016	263642000	251031008
QLVASGKPESFSGEFLVPSYR	P23322,PGSC0003DMP400004990,E5LP98,Q40459,Q84QE8,Q58H58	3	48.0712	766.734	3039000060	2453580030	1768039940	1970880000	2556300030	2364019970	2073539970	2790099970	1635910020	1618489980	2745492220	1856447360	2851529980	2787450110	2658939900	1437490050	1978790020	3211441410	2457989890	2328150020
IQGIWYAQLE	P23322,PGSC0003DMP400004990,Q40459,Q84QE8,Q58H58	2	54.8999	610.822	210180000	206318000	128042000	197995008	183039008	214990000	147846000	156908000	150964000	150756992	283312000	169348992	247044000	270707008	210564992	195015008	216676992	298331008	239526000	283288992
ELGTPIVMHDYLTGGFTANTTLAHYCR	P25079	3	56.2917	1013.49	null	null	null	null	null	null	null	null	null	6579150	null	null	null	null	null	null	null	null	null	null
ELGTPIVMHDYLTGGFTANTTLAHYCR	P25079	4	54.7502	760.371	null	null	3446660	null	null	null	null	null	null	11366600	3190750	2190200	null	null	null	null	14804500	15855400	5752770	4659020
ELGTPIVMHDYLTGGFTANTTLAHYCR Oxidation (M) @0.000000010000000000000000000.0	P25079	3	48.5018	1018.82	40891400	67953696	159666000	31161400	176404000	83540496	119200000	92826704	54590300	247258000	96574096	111698000	186704992	150400992	138640992	48751400	309171008	285384000	211882000	202066000
ELGTPIVMHDYLTGGFTANTTLAHYCR Oxidation (M) @0.000000010000000000000000000.0	P25079	4	48.2782	764.371	118976000	219617392	507834272	117372808	499288704	296659488	345023008	243916992	179227008	616742980	232164000	312988288	589278980	435156288	376587104	181417648	883987970	957714300	637770300	599256580
LEDLRIPVAYVK	P25079,B5LBZ4,C6FJV7,E7E8A9,D0F114	2	44.7224	708.42	177332992	166711008	213996000	40169300	117706000	315886016	211244000	222744992	52429700	199847008	51348800	54255500	270628000	133681000	196864000	153370000	346175008	329886016	204487008	289028992
LEDLRIPVAYVK	P25079,B5LBZ4,C6FJV7,E7E8A9,D0F114	3	44.7177	472.616	601500030	678660990	798483970	254494000	546844990	1082809980	748056000	775398980	219783008	702491010	252916000	270884000	889004030	474272992	619827010	504991008	1227079940	1241059970	785596990	1050140030
VTPQPGVPPEEAGAAVAAESSTGTWTTVWTDGLTSLDR	P25079,E0DA00,E0DA03,E0DA07,E0D9Z9,E0DA01,E0DA02,E0DA05,C4PBE4,C4PBE5,P27065,C9WDV1,C9WDV2,C9WEH0,D0G881,C9WDV3,D3W557,D3W561,B5LBZ4,B0Z1B1,B5LBZ8,C6FJV7,D2JXL9,D2JXU2,D2JXW8,D2JXX7,D2JXZ0,B5LBZ7,E7E8A9,D0F115,D0F116,D0F117,C6KJX7,C6KJX8,E7E8A7,E7E8A8,D0F114,Q2MIH9,P48709,Q3C1J4,Q33C26,P00876,P11422,E0D9Z7,A2VB70,P11421,O03042,Q85B88,E0DA04	4	64.9808	964.478	64233800	98888704	91070896	45969400	222860992	119343000	99569904	126437000	55753400	110076000	28522300	49210300	169112000	70493800	null	59872800	168736992	184811008	117662000	82613800
FLFCAEALFK	P25079,E0DA00,E0DA03,E0DA07,Q2MIH9,E0D9Z9,E0DA01,C4PBE4,C4PBE5,P27065,P48709,D3W557,D3W561,P400055787	2	66.0162	623.323	344368224	271587168	530492896	194188832	1303271680	452397280	578687810	480727744	279140000	753791550	177922112	180698624	433276960	563208580	4631740	326307008	770206210	974680060	878197630	323836224
AVYECLR	P25079,E0DA00,E0DA03,E0DA07,Q2MIH9,E0D9Z9,E0DA01,P400055787,C4PBE4,C4PBE5,P27065,P48709,C9WDV1,C9WDV2,C9WEH0,E0DA02,E0DA05,E0DA06,D3W557,D3W561,D0G881,A2VB70,C9WDV3,B0Z1B1,B5LBZ4,B5LBZ8,F4INE2,P93292,C6FJV7,D2JXL9,D2JXU2,D2JXW8,D2JXX7,D2JXZ0,B5LBZ7,Q8MDI4,Q3C1J4,Q33C26,P00876,P11422,E0DA04,E0D9Z7,P11421,Q85B88,O03042	2	28.1094	455.728	2130300030	4692250100	2468750080	1065529980	7504679900	6353970200	4903419900	3759689980	1566569980	4243059970	2032189950	1206370050	5632880100	3047049980	2117560060	1925639940	5742459900	6367870000	2383610110	4275000060
DDENVNSQPFMR Oxidation (M) @0.000000000010.0	P25079,E0DA00,E0DA03,E0DA07,Q2MIH9,E0DA02,E0DA05,E0D9Z9,E0DA01,E0DA06,C4PBE4,C4PBE5,P27065,P48709,Q3C1J4,C9WDV1,C9WDV2,C9WEH0,Q33C26,P00876,P11421,D0G881,A2VB70,C9WDV3,P11422,D3W557,D3W561,B5LBZ4,B0Z1B1,B5LBZ8,E0DA04,F4INE2,P400055787,E0D9Z7,Q85B88,O03042,P93292	2	28.8892	734.315	1538445180	1647333890	1613540100	632160130	2614915070	2150565890	1976550020	1685115140	445457600	1286226820	800822340	520862304	2045107710	1372852990	570984770	925655810	1309465340	1384544770	724427520	882054080
AMHAVIDR	P25079,E0DA00,E0DA03,E0DA07,Q2MIH9,E0DA02,E0DA05,E0D9Z9,E0DA01,E0DA06,C4PBE4,C4PBE5,P27065,P48709,Q3C1J4,C9WDV1,C9WDV2,C9WEH0,Q33C26,P00876,P11421,D0G881,A2VB70,C9WDV3,P11422,E0DA04,P400055787,E0D9Z7,Q85B88,O03042	2	21.8179	456.74	null	3346070	2348230	null	1652470	null	null	1725470	420360	2350870	700520	null	1210450	500435	null	null	2131690	5614690	1480700	2825110
AQAETGEIK	P25079,E0DA02,E0DA05,E0DA06,C4PBE4,C4PBE5,Q3C1J4,C9WDV1,C9WDV2,C9WEH0,Q33C26,P00876,D0G881,A2VB70,C9WDV3,B0Z1B1,E0D9Z7	2	15.2688	473.746	3916420	10195600	6491560	3016420	10822700	6484680	10461400	3771670	1175160	4266800	1.4318e+06	1442040	4788390	1905680	3896560	2006670	4269500	4930630	4508240	null
EIVFNFAAMDVLDK	P25079,P400055787	2	68.1388	806.41	null	null	7382790	null	null	null	null	2761630	null	8618280	null	null	null	null	null	null	null	null	null	null
EIVFNFAAMDVLDK Oxidation (M) @0.00000000100000.0	P25079,P400055787	2	63.232	814.41	1970405890	1716215040	2448268030	747511490	3102330370	1605071360	2355342590	1524892290	696731390	2070999940	985732160	671777730	2633118210	1595283460	754390400	1204113660	1454812420	1535319810	1323269250	1044433790
EIVFNFAAMDVLDK Oxidation (M) @0.00000000100000.0	P25079,P400055787	3	54.5176	543.276	36203100	26483800	9446390	null	50474240	18270740	26014300	18781600	6335410	7919680	7546800	1765740	54353200	18523900	6600140	null	24942800	46189200	27766800	24764600
DDFIEQDR	P25079,P400055787,E0DA00,E0DA03,E0DA07,E0D9Z9,E0DA01,E0DA02,E0DA05,E0DA06,Q2MIH9	2	29.2545	519.232	1470875650	1671079680	2056813570	541031040	2804366850	2265552380	2543881220	1723389060	508378496	1813928060	950288770	595827650	2490605570	1349663870	1213726980	1406028420	1544052350	1721422590	1056705150	1456432130
GGLDFTKDDENVNSQPFMR	P25079,P400055787,Q2MIH9,C4PBE4,C4PBE5,P27065,C9WDV1,C9WDV2,C9WEH0,D3W557,D3W561,B5LBZ4,B0Z1B1,B5LBZ8,E0DA00,E0DA03,E0DA07,E0D9Z9,E0DA01,P11421,P11422,E0DA02,E0DA05,E0DA06,D0G881,C9WDV3,P48709,Q3C1J4,Q33C26,P00876,E0D9Z7,A2VB70,O03042,Q85B88,E0DA04	2	46.332	1085.5	null	null	7100280	null	null	null	null	null	null	7140630	null	803417	null	null	null	null	null	null	null	3608810
GGLDFTKDDENVNSQPFMR Oxidation (M) @0.0000000000000000010.0	P25079,P400055787,Q2MIH9,C4PBE4,C4PBE5,P27065,C9WDV1,C9WDV2,C9WEH0,D3W557,D3W561,B5LBZ4,B0Z1B1,B5LBZ8,E0DA00,E0DA03,E0DA07,E0D9Z9,E0DA01,P11421,P11422,E0DA02,E0DA05,E0DA06,D0G881,C9WDV3,P48709,Q3C1J4,Q33C26,P00876,E0D9Z7,A2VB70,O03042,Q85B88,E0DA04	2	39.3578	1093.5	318310016	352715776	442680000	67644192	249501152	358535072	494250688	255699424	87040624	310734176	110053160	57662900	479476000	176116352	262680512	326251104	390123584	375797312	247598784	306266368
DDENVNSQPFMR	P25079,P400055787,Q2MIH9,C4PBE4,C4PBE5,P27065,C9WDV1,C9WDV2,C9WEH0,D3W557,D3W561,B5LBZ4,B0Z1B1,B5LBZ8,F4INE2,P93292,E0DA00,E0DA03,E0DA07,E0D9Z9,E0DA01,P11421,P11422,E0DA02,E0DA05,E0DA06,D0G881,C9WDV3,P48709,Q3C1J4,Q33C26,P00876,E0D9Z7,A2VB70,O03042,Q85B88,E0DA04	2	35.2078	726.317	8953550	20518500	28854400	null	10525000	null	2376980	13792900	4017090	34101900	8946880	5547990	5518270	5895000	null	null	27248000	30446100	8662730	12677700
DNGLLLHIHR	P25079,P400055787,Q2MIH9,C4PBE4,C4PBE5,P27065,C9WDV1,C9WDV2,C9WEH0,E0DA00,E0DA03,E0DA07,E0D9Z9,E0DA01,P11421,E0DA02,E0DA05,E0DA06,D0G881,C9WDV3,P48709,Q3C1J4,Q33C26,P00876,E0D9Z7,A2VB70,O03042,Q85B88,E0DA04	2	34.59	594.338	59445500	90168184	31759500	6756970	45319700	101559000	110443000	64509420	40511500	232695008	46943700	47243600	144678000	124718000	123826000	200259008	427799520	416389504	297104000	493332000
DITLGFVDLLR	P25079,P400055787,Q2MIH9,C4PBE4,C4PBE5,P27065,C9WDV1,C9WDV2,C9WEH0,E0DA00,E0DA03,E0DA07,E0D9Z9,E0DA01,P11421,P11422,E0DA02,E0DA05,E0DA06,D0G881,C9WDV3,P48709,Q3C1J4,Q33C26,P00876,E0D9Z7,A2VB70	2	67.7862	631.364	1070387010	1218339580	2866656000	661915140	2277724160	1197441020	2362542340	1467806340	527495328	1931031940	1048940930	808793150	2057685380	1043558020	901716350	970992450	1262630910	1273301630	1277437440	991135300
MSGGDHIHSGTVVGK	P25079,P400055787,Q2MIH9,C4PBE4,C4PBE5,P27065,C9WDV1,C9WDV2,C9WEH0,E0DA00,E0DA03,E0DA07,E0D9Z9,E0DA01,P11421,P11422,P48709,Q3C1J4,Q33C26,P00876,E0D9Z7	2	22.0249	741.363	null	721318	null	null	305043	null	234918	436984	null	2792650	null	null	190870	394950	null	null	3325930	3815780	1319800	2216250
MSGGDHIHSGTVVGK Oxidation (M) @0.100000000000000.0	P25079,P400055787,Q2MIH9,C4PBE4,C4PBE5,P27065,C9WDV1,C9WDV2,C9WEH0,E0DA00,E0DA03,E0DA07,E0D9Z9,E0DA01,P11421,P11422,P48709,Q3C1J4,Q33C26,P00876,E0D9Z7	2	16.0361	749.36	13145870	54732440	7018550	5418720	41567500	29080600	38029500	29353900	12782290	41699500	5748580	4138890	52711260	3888820	28981980	45326760	50080800	9495976	8133420	62094100
MSGGDHIHSGTVVGK Oxidation (M) @0.100000000000000.0	P25079,P400055787,Q2MIH9,C4PBE4,C4PBE5,P27065,C9WDV1,C9WDV2,C9WEH0,E0DA00,E0DA03,E0DA07,E0D9Z9,E0DA01,P11421,P11422,P48709,Q3C1J4,Q33C26,P00876,E0D9Z7	3	16.6089	499.909	388451264	982313410	586289980	287403904	1167949060	906194820	973642820	803412990	361375584	1077660030	469825984	313533408	1227527300	366209440	745700740	951257730	1258386180	887378050	607748990	null
DRFLFCAEALFK	P25079,P400055787,Q2MIH9,C4PBE4,C4PBE5,P27065,D3W557,D3W561,E0DA00,E0DA03,E0DA07,E0D9Z9,E0DA01,P48709	2	56.7191	758.889	16238400	8203580	null	10920230	79737600	32106200	34076700	29830600	17097000	46782800	15311700	13036500	35711300	44053000	12488000	19957600	54569900	63081000	63053300	36281700
MSGGDHIHSGTVVGKLEGER Oxidation (M) @0.10000000000000000000.0	P25079,P400055787,Q2MIH9,E0DA00,E0DA03,E0DA07,E0D9Z9,E0DA01,C4PBE4,C4PBE5,P27065,P48709,Q3C1J4,Q33C26,P00876,C9WDV1,C9WDV2,C9WEH0,P11421,P11422,E0D9Z7	4	26.0903	521.258	4681960	null	2485260	540609	null	15039490	null	null	4963230	null	null	2970040	null	10927600	8680340	6871320	69661640	60520860	11490630	44540688
DITLGFVDLLRDDFIEQDR	P25079,P400055787,Q2MIH9,E0DA00,E0DA03,E0DA07,E0D9Z9,E0DA01,E0DA02,E0DA05,E0DA06	2	70.2502	1140.58	292460800	131614592	14715480	132120432	383772992	222431792	363615968	407995072	119089504	535450560	66506128	82699800	145071120	406391456	132834320	348980992	435754944	393501696	372778368	99223496
DITLGFVDLLRDDFIEQDR	P25079,P400055787,Q2MIH9,E0DA00,E0DA03,E0DA07,E0D9Z9,E0DA01,E0DA02,E0DA05,E0DA06	3	69.0713	760.725	945001660	490758240	1636930690	597341380	1447528060	794992960	1142821890	1243441150	466187168	1673970690	218594400	340997312	670566270	1347582340	211258976	1395329540	1695428220	1520012030	1468164860	394622176
GHYLNATAGTCEEMMK	P25079,P400055787,Q2MIH9,E0DA00,E0DA03,E0DA07,E0D9Z9,E0DA01,E0DA02,E0DA05,E0DA06	2	37.9353	906.889	null	null	null	null	null	null	null	null	null	null	null	null	null	null	null	null	null	null	null	null
GHYLNATAGTCEEMMK	P25079,P400055787,Q2MIH9,E0DA00,E0DA03,E0DA07,E0D9Z9,E0DA01,E0DA02,E0DA05,E0DA06	3	37.9835	604.929	null	null	null	null	null	null	null	null	null	null	null	null	null	null	null	null	null	null	null	null
GHYLNATAGTCEEMMK 2 Oxidation (M) @0.0000000000000110.0	P25079,P400055787,Q2MIH9,E0DA00,E0DA03,E0DA07,E0D9Z9,E0DA01,E0DA02,E0DA05,E0DA06	3	25.3827	615.594	123511000	145936992	223447008	69621696	270364000	235352000	246331008	178852992	64646900	254175008	138047008	89577000	264922000	182555008	151244000	98679400	201862000	210864000	146452992	226884000
GHYLNATAGTCEEMMK Oxidation (M) @0.0000000000000010.0	P25079,P400055787,Q2MIH9,E0DA00,E0DA03,E0DA07,E0D9Z9,E0DA01,E0DA02,E0DA05,E0DA06	2	33.4828	914.886	null	null	null	null	null	null	null	null	null	null	null	null	null	null	null	null	null	null	null	null
GHYLNATAGTCEEMMK Oxidation (M) @0.0000000000000100.0	P25079,P400055787,Q2MIH9,E0DA00,E0DA03,E0DA07,E0D9Z9,E0DA01,E0DA02,E0DA05,E0DA06	2	33.1974	914.886	null	null	null	null	null	null	null	null	null	null	null	null	null	null	null	null	null	null	null	null
GHYLNATAGTCEEMMK Oxidation (M) @0.0000000000000100.0	P25079,P400055787,Q2MIH9,E0DA00,E0DA03,E0DA07,E0D9Z9,E0DA01,E0DA02,E0DA05,E0DA06	3	31.7282	610.261	null	null	5524050	null	null	null	null	1989760	null	5813660	2100940	661094	null	null	null	null	null	null	null	null
GHYLNATAGTCEEMMKR	P25079,P400055787,Q2MIH9,E0DA00,E0DA03,E0DA07,E0D9Z9,E0DA01,E0DA02,E0DA05,E0DA06	3	36.0231	656.963	null	null	null	null	null	null	null	null	null	null	null	null	null	null	null	null	null	null	null	null
GHYLNATAGTCEEMMKR 2 Oxidation (M) @0.00000000000001100.0	P25079,P400055787,Q2MIH9,E0DA00,E0DA03,E0DA07,E0D9Z9,E0DA01,E0DA02,E0DA05,E0DA06	2	22.2293	1000.94	21767200	39598400	6960250	5991180	48302600	40777300	44291400	28809900	6702120	37622400	4999730	2832290	41822200	24044900	31118100	23785500	47811800	20830400	36044700	53744400
GHYLNATAGTCEEMMKR 2 Oxidation (M) @0.00000000000001100.0	P25079,P400055787,Q2MIH9,E0DA00,E0DA03,E0DA07,E0D9Z9,E0DA01,E0DA02,E0DA05,E0DA06	3	23.0089	667.627	765639420	960847170	1125010050	442665664	1849368700	1458044030	1437404030	1131249410	398149568	12962320	662460540	465738560	1620061700	965753980	893869630	662131970	1266710140	1175416450	877764420	1331637630
GHYLNATAGTCEEMMKR 2 Oxidation (M) @0.00000000000001100.0	P25079,P400055787,Q2MIH9,E0DA00,E0DA03,E0DA07,E0D9Z9,E0DA01,E0DA02,E0DA05,E0DA06	4	21.966	500.972	152661952	382511712	42509820	29195600	214831888	232585840	193831488	146317680	33903904	144324480	24955688	30707040	300552704	132100336	230380512	117899000	345410752	189385024	181366000	270701984
GHYLNATAGTCEEMMKR Oxidation (M) @0.00000000000001000.0	P25079,P400055787,Q2MIH9,E0DA00,E0DA03,E0DA07,E0D9Z9,E0DA01,E0DA02,E0DA05,E0DA06	3	31.0656	662.293	null	null	null	null	null	null	null	null	null	null	null	null	null	null	null	null	null	null	null	null
GGLDFTKDDENVNSQPFMR	P25079,P400055787,Q2MIH9,E0DA00,E0DA03,E0DA07,E0D9Z9,E0DA01,E0DA02,E0DA05,E0DA06,C4PBE4,C4PBE5,P27065,P48709,A2VB70,C9WDV1,C9WDV2,C9WEH0,D0G881,C9WDV3,D3W557,D3W561,B5LBZ4,B0Z1B1,B5LBZ8,Q3C1J4,Q33C26,P00876,P11422,E0D9Z7,P11421,O03042,Q85B88,E0DA04	3	43.9336	724.004	5041730	22059900	54903800	null	12397800	5888280	2524350	12772600	4175480	48833900	10855000	7236290	10112500	4113540	null	null	53353200	53688600	15373800	23381800
GHYLNATAGTCEEMMKR Oxidation (M) @0.00000000000000100.0	P25079,P400055787,Q2MIH9,E0DA00,E0DA03,E0DA07,E0DA01,E0D9Z9,E0DA02,E0DA05,E0DA06	3	27.0798	662.296	3117010	15884390	28955900	null	15186870	4554200	null	11888850	3259905	36946760	7869110	4426650	4107720	2684850	null	null	27324260	24544370	7557770	11488360
TFQGPPHGIQVER	P25079,P400055787,Q2MIH9,E0DA00,E0DA03,E0DA07,E0DA01,E0DA02,E0DA05,C4PBE4,C4PBE5,P27065,P48709,E0DA06,Q3C1J4,Q33C26,P00876,A2VB70,O03042,C9WDV1,C9WDV2,C9WEH0,P11421,D0G881,C9WDV3,P11422,D3W557,D3W561,Q85B88,B5LBZ4,B0Z1B1,B5LBZ8,E0DA04,C6FJV7,D2JXL9,D2JXU2,D2JXW8,D2JXX7,D2JXZ0,B5LBZ7,E7E8A9,D0F115,D0F116,D0F117,C6KJX7,C6KJX8,E7E8A7,E7E8A8,D0F114,Q8MDI4,E0D9Z9,E0D9Z7	3	31.8376	489.259	4851370000	7501810200	3247109890	1533959940	8226820100	5479340000	6560629800	4678510100	2291000060	7845069800	3726340100	3156760060	8858009600	6471340000	6077060100	7786999800	12458900500	12823499800	8911970300	12654000100
YGRPLLGCTIKPK	P25079,P400055787,Q2MIH9,E0DA00,E0DA03,E0DA07,E0DA02,E0DA05,E0D9Z9,E0DA01,E0DA06,C4PBE4,C4PBE5,P27065,P48709,Q3C1J4,Q33C26,P00876,A2VB70,E0D9Z7,C9WDV1,C9WDV2,C9WEH0,P11421,D0G881,C9WDV3,P11422,D3W557,D3W561,B5LBZ4,B0Z1B1,B5LBZ8,E0DA04,C6FJV7,D2JXL9,D2JXU2,D2JXW8,D2JXX7,D2JXZ0,B5LBZ7,E7E8A9,D0F115,D0F116,D0F117,C6KJX7,C6KJX8,E7E8A7,E7E8A8,Q8MDI4,O03042,Q85B88	2	29.626	751.932	167304992	236515008	14383100	6841150	286116992	234470000	199488000	155916000	37304200	171260000	13685400	13184700	236552992	134490000	167207008	198675008	374833984	417201984	123404000	354528000
GGLDFTKDDENVNSQPFMR Oxidation (M) @0.0000000000000000010.0	P25079,P400055787,Q2MIH9,E0DA00,E0DA03,E0DA07,E0DA02,E0DA05,E0D9Z9,E0DA01,E0DA06,C4PBE4,C4PBE5,P27065,P48709,Q3C1J4,Q33C26,P00876,A2VB70,E0D9Z7,C9WDV1,C9WDV2,C9WEH0,P11421,D0G881,C9WDV3,P11422,D3W557,D3W561,B5LBZ4,B0Z1B1,B5LBZ8,E0DA04,O03042,Q85B88	3	39.3673	729.336	1718071940	2174640130	3086599940	849998020	2462729980	2872989950	3036620030	1921527040	684523650	2135323900	1106214530	794590720	3625979900	1311696000	1689832960	2000334980	2139629950	2523747070	1547330050	1902393980
VTPQPGVPPEEAGAAVAAESSTGTWTTVWTDGLTSLDR	P25079,Q2MIH9,C4PBE4,C4PBE5,P27065,C9WDV1,C9WDV2,C9WEH0,D3W557,D3W561,B5LBZ4,B0Z1B1,B5LBZ8,C6FJV7,E7E8A9,D2JXL9,D2JXU2,D2JXW8,D2JXX7,D2JXZ0,D0F115,D0F116,D0F117,C6KJX7,C6KJX8,E7E8A7,E7E8A8,D0F114,E0DA00,E0DA03,E0DA07,E0D9Z9,E0DA01,P11421,P11422,E0DA02,E0DA05,D0G881,C9WDV3,P48709,Q3C1J4,Q33C26,P00876,E0D9Z7,A2VB70,O03042,Q85B88,E0DA04,B5LBZ7	3	62.5645	1285.63	254381296	372947296	456612096	109502432	417106912	235646000	247690192	229369792	103888016	278252416	64326320	107018896	336945184	229279904	8130920	162447888	451376576	395143296	260119104	197806912
LTYYTPEYQTK	P25079,Q2MIH9,C4PBE4,C4PBE5,P27065,D3W557,D3W561,B5LBZ4,B0Z1B1,B5LBZ8,C6FJV7,E7E8A9,D2JXL9,D2JXU2,D2JXW8,D2JXX7,D2JXZ0,D0F115,D0F116,D0F117,C6KJX7,C6KJX8,E7E8A7,E7E8A8,D0F114,E0DA00,E0DA03,E0DA07,P11421,P11422,E0DA02,E0DA05,P48709,Q3C1J4,Q33C26,P00876,E0D9Z7,A2VB70,B5LBZ7	2	35.4421	703.849	4343710200	6600459800	6014689800	null	4985300000	8333519900	6392320000	4906570200	1929820030	6384510000	3199069950	2325410050	8496929800	5595480100	4751980000	5519519700	7463750100	5149340200	5246519800	6954570200
WSPELAAACEVWK	P25079,Q2MIH9,C4PBE4,C4PBE5,P27065,P48709,Q3C1J4,Q33C26,P00876,A2VB70,O03042,Q9MVP0,P400055787	2	51.3443	773.875	174883008	401399008	559512000	134863008	579500030	403348992	453551008	415176000	169536992	537932030	235080000	200900992	558337980	341177984	279580000	122640000	572641980	542014980	345886016	300772000
EGNEIIR	P25079,Q2MIH9,E0DA00,E0DA03,E0DA07,E0D9Z9,E0DA01,C4PBE4,C4PBE5,P27065,E0DA04	2	22.2943	415.727	1093738240	1630018180	992328700	557057340	1999787390	1643992700	1486146560	1344123010	373226016	754540030	557545090	387808512	12531200	905668860	872712900	552405120	1157242500	1223499140	1219500800	1826696700
DTDILAAFR	P25079,Q2MIH9,E0DA00,E0DA03,E0DA07,E0DA02,E0DA05,C4PBE4,C4PBE5,P27065,P48709,Q3C1J4,Q33C26,P00876,A2VB70,E0D9Z7,C9WDV1,C9WDV2,C9WEH0,P11421,D0G881,C9WDV3,P11422,D3W557,D3W561,B5LBZ4,B0Z1B1,B5LBZ8,C6FJV7,D2JXL9,D2JXU2,D2JXW8,D2JXX7,D2JXZ0,B5LBZ7,E7E8A9,D0F115,D0F116,D0F117,C6KJX7,C6KJX8,E7E8A7,E7E8A8,D0F114,O03042,Q85B88	2	60.0994	511.272	4468086800	6184825300	8879990800	2912150780	9822677000	7201180700	7706745900	6275596300	2134367490	6151708200	4547629100	3425158400	8321118700	6152914900	4728951800	4071348740	7764843000	7940888100	5785270300	7507012600
LEGERDITLGFVDLLR	P25079,Q2MIH9,E0DA00,E0DA03,E0DA07,P400055787,E0DA02,E0DA05,C4PBE4,C4PBE5,P27065,P48709,Q3C1J4,Q33C26,P00876,A2VB70,E0D9Z9,E0DA01,E0DA06,C9WDV1,C9WDV2,C9WEH0,P11421,P11422,D0G881,C9WDV3,E0D9Z7	2	59.4879	923.511	56361000	37386500	51304700	21376600	105655000	68358896	55407400	73550896	28912100	88417696	32394400	37655000	62943600	88775800	null	68029800	129157000	136556992	100226000	81521200
LEGERDITLGFVDLLR	P25079,Q2MIH9,E0DA00,E0DA03,E0DA07,P400055787,E0DA02,E0DA05,E0DA01,E0DA06,C4PBE4,C4PBE5,P27065,P48709,Q3C1J4,Q33C26,P00876,A2VB70,C9WDV1,C9WDV2,C9WEH0,P11421,P11422,D0G881,C9WDV3,E0D9Z9,E0D9Z7	3	56.778	616.008	439061120	330933472	485195392	221579696	764980990	549563070	457035008	467850272	202843008	558872700	220317984	278508896	514233216	628707200	25799200	453365408	866357820	1016422020	658093380	569913090
DRFLFCAEALFK	P25079,Q2MIH9,P400055787,E0DA00,E0DA03,E0DA07,E0D9Z9,C4PBE4,C4PBE5,P27065,D3W557,D3W561,E0DA01,P48709	3	56.5912	506.261	4908930	1328990	6898660	1319160	23492300	6341760	8394660	3911780	2681010	8496920	1785190	3171330	10102400	8898760	2553820	6403600	19104100	23797500	23981300	6401650
YGRPLLGCTIKPK	P25079,Q2MIH9,P400055787,E0DA00,E0DA03,E0DA07,E0D9Z9,E0DA01,C4PBE4,C4PBE5,P27065,P48709,E0DA02,E0DA05,Q3C1J4,Q33C26,P00876,E0DA06,A2VB70,O03042,E0D9Z7,C9WDV1,C9WDV2,C9WEH0,P11421,P11422,D3W557,D3W561,D0G881,C9WDV3,B5LBZ4,B0Z1B1,B5LBZ8,Q85B88,E0DA04,C6FJV7,D2JXL9,D2JXU2,D2JXW8,D2JXX7,D2JXZ0,B5LBZ7,E7E8A9,D0F115,D0F116,D0F117,C6KJX7,C6KJX8,E7E8A7,E7E8A8,Q8MDI4	3	29.5686	501.624	2415578370	3131249920	1426729980	606726980	4958773800	4125179900	3324365820	2931842560	886380930	3221700100	1113354110	853888380	3728700420	2441521410	2560243710	2305105410	4988137500	5384894500	2318456060	4560730100
MSGGDHIHSGTVVGK	P25079,Q2MIH9,P400055787,E0DA00,E0DA03,E0DA07,E0D9Z9,E0DA01,C4PBE4,C4PBE5,P27065,P48709,Q3C1J4,Q33C26,P00876,E0D9Z7,C9WDV1,C9WDV2,C9WEH0,P11421,P11422	3	19.8648	494.574	16985264	29575600	21962570	6959077	33215840	30454790	17134130	31997810	24166300	79582208	35776900	23766470	29205588	31148678	33958480	25140530	84461104	106137848	67904152	95058496
GHYLNATAGTCEEMMK 2 Oxidation (M) @0.0000000000000110.0	P25079,Q2MIH9,P400055787,E0DA00,E0DA03,E0DA07,E0D9Z9,E0DA01,E0DA02,E0DA05,E0DA06	2	23.7756	922.887	18759800	20004100	8920870	7958600	33082600	29617100	33664900	22185800	6366330	30344000	6914630	3938910	31121500	20728700	22121100	17074100	30509600	28796900	26074500	38419900
TFQGPPHGIQVER	P25079,Q2MIH9,P400055787,E0DA00,E0DA03,E0DA07,E0D9Z9,E0DA02,E0DA05,C4PBE4,C4PBE5,P27065,E0DA06,A2VB70,C9WDV1,C9WDV2,C9WEH0,D0G881,C9WDV3,D3W557,D3W561,B5LBZ4,B0Z1B1,B5LBZ8,C6FJV7,D2JXL9,D2JXU2,D2JXW8,D2JXX7,D2JXZ0,B5LBZ7,E7E8A9,D0F115,D0F116,D0F117,C6KJX7,C6KJX8,E7E8A7,E7E8A8,D0F114,Q8MDI4,E0DA01,P48709,Q3C1J4,Q33C26,P00876,P11422,E0D9Z7,P11421,O03042,Q85B88,E0DA04	2	31.8805	733.384	737444990	1024380030	237519008	99462704	1183299970	771595010	1054030020	651292990	284448000	1240669950	316054016	null	1362150020	965073020	993782020	1369539970	2165420030	2261110020	1524489980	2167300100
ILVIEGLHPMFDER Oxidation (M) @0.00000000010000.0	P25697	3	51.0762	562.297	null	null	null	null	null	null	null	null	null	null	1620140	null	null	null	null	null	null	null	null	null
KVIITAPGK	P25856	2	23.7519	463.806	49051500	49751500	44571900	22797800	87734600	75630896	62477100	49717200	14157000	53674000	22211300	15565300	70473800	42627500	36620000	51153700	55844100	53207400	39303900	51970500
GTGTANQCPTIDGGVDSFAFKPGK	P26320,C5MR70	2	42.2686	1213.08	215196000	135368000	71432896	45881500	53707400	149576992	103305000	177456992	69309296	81828704	77105200	52882600	108056000	102705000	123285000	69612400	108508000	165460992	132742000	211086000
GTGTANQCPTIDGGVDSFAFKPGK	P26320,C5MR70	3	41.5297	809.057	5273936900	4171241980	2654018560	2815281150	3148000000	5044611600	3531943170	5212769800	2612881920	2782263300	3290371840	2664919550	4029698050	3380709380	3475417090	1996944130	3290287100	5457015800	4308061200	5940409900
IQGIWYAQLES	P26320,P400017746	2	53.6942	654.338	171396992	178872992	151523008	180814000	161247008	168430000	154416992	142394000	161918000	134033000	179983008	163851008	210234000	300303008	223430000	170556992	195692000	312643008	213912992	221348992
SNPQTGEVIGVFESIQPSDTDLGAK	P26320,P400017746	2	54.3904	1295.14	1031507070	782803710	416032576	727378880	576960770	645336130	635699140	681247040	554271940	556613950	957825860	624821500	717758980	885292160	699048510	393727040	639272770	898686080	878130750	1253657220
SNPQTGEVIGVFESIQPSDTDLGAK	P26320,P400017746	3	54.721	863.765	1531985790	1097420030	600779010	1051619710	1070363010	1214845950	829496640	814915010	712155010	599547200	1292080000	868440000	1525685890	1349985660	972969150	799707070	957158020	1611049220	1327789950	1725075330
LTYTLDEIEGPFEVSPDGTVK	P26320,P400017746,C5MR70,P23322,PGSC0003DMP400004990,E5LP98,Q157M6	3	55.8332	770.722	417428992	279255520	208515536	194186784	365442624	370556576	297577984	244415888	228062432	112474144	483894016	144684000	397848288	266642608	189126000	89744496	213513888	432947616	355844288	347104928
LTYTLDEIEGPFEVSPDGTVKFEEK	P26320,P400017746,C5MR70,P23322,PGSC0003DMP400004990,E5LP98,Q157M6	3	55.9536	948.472	1350998020	881230980	600689410	1004404030	988953980	912584000	660893120	828100030	818771970	711003710	973662020	831465020	976648000	1311133950	1042558980	754807040	773862020	1237192960	1101677950	1335598980
GDEEELQKENVK	P26320,P400017746,C5MR70,P23322,PGSC0003DMP400004990,E5LP98,Q40459	3	22.0843	473.232	1697885060	1780676100	636996740	751943040	1601037440	1729104000	1271642110	1598070020	788747010	919123200	1096115840	621930500	1551809660	1398936060	1694285060	1167585920	1124994820	1870486020	1504487940	2085420030
FEEKDGIDYAAVTVQLPGGER	P26320,P400017746,C5MR70,P23322,PGSC0003DMP400004990,E5LP98,Q40459,Q84QE8,Q58H58	2	46.1622	1147.57	291676000	213864992	152084000	108089000	120377000	262844208	190263008	291876000	136450000	177692000	284700000	163036000	238938224	180115008	260617792	124314848	154792992	236228992	236348992	236560000
VPFLFTIK	P26320,P400017746,C5MR70,P23322,PGSC0003DMP400004990,E5LP98,Q40459,Q84QE8,Q58H58,Q6RUN4	2	64.8768	482.799	9418250200	9897854000	4440801300	7797062700	7740731400	9794522100	8140360200	8517577700	7773050900	252758928	10253032400	7421865500	9909627900	11904245800	8469825500	6429275600	8240441300	13237447700	10167796700	13481932800
GGSTGYDNAVALPAGGR	P26320,P400017746,C5MR70,P23322,PGSC0003DMP400004990,E5LP98,Q40459,Q84QE8,Q58H58,Q9S841,P23321	2	33.4856	781.885	3065040380	2797381380	1210679040	1343198590	1756844290	2735837950	2126090500	2394844160	1457823490	1677400190	2160290560	1166715900	2243731970	2288499710	1846708740	1857542660	1775504900	2941483260	2372475900	3120933890
GRGGSTGYDNAVALPAGGR	P26320,P400017746,C5MR70,P23322,PGSC0003DMP400004990,E5LP98,Q40459,Q84QE8,Q58H58,Q9S841,P23321	2	30.5961	888.447	86653904	67335600	6860110	14749100	45877400	73834096	45073700	69922496	27210700	30891100	25487000	12218200	60041400	37213800	78153904	70879104	25506300	98088096	73006000	105061000
ENVKNTASLTGK	P26320,P400017746,C5MR70,PGSC0003DMP400004990,P23322,E5LP98	3	18.7364	421.23	13462500	11228100	1681250	4375230	8847450	11614500	4071240	9858770	4051510	4136000	3944440	3210120	7841680	12621700	16097800	11622900	13198000	19334000	10572000	21874900
DGIDYAAVTVQLPGGER	P26320,P400017746,C5MR70,PGSC0003DMP400004990,P23322,E5LP98,Q40459,Q84QE8,Q58H58	3	48.7796	587.635	95150896	71912400	40047100	41948800	80526600	63427900	48692900	59288400	35179900	26972000	46745900	33257800	101745000	72207800	74624096	33957600	55646700	121438000	88463400	102902000
FCLEPTSFTVK	P26320,Q157M5,P400017746,C5MR70,P23322,PGSC0003DMP400004990,E5LP98,Q157M6,Q40459,Q84QE8,Q58H58	2	47.516	664.835	2701018110	2488169980	2052889980	1696620030	1967600000	3084430080	2208869890	3054789890	1775900030	1780710020	2920910080	1934540030	3156160000	2835500030	2972570880	1053510020	2244470020	3674390020	3079119870	3296049920
KFCLEPTSFTVK	P26320,Q157M5,P400017746,P23322,PGSC0003DMP400004990,E5LP98,Q157M6,C5MR70,Q40459,Q84QE8	2	43.0165	728.879	3429026050	2494973180	1458103040	1289968000	1522161020	3151668220	2134009980	3542245120	1662865540	1869594110	2288380160	1511452160	2828376060	2543195390	2833784320	1377032060	2796344320	4241579010	3481595900	4644195800
RLTFDEIQSK	P26320,Q157M5,Q7M1J9,C5MR70,P400017746,Q40459,Q84QE8,Q58H58	3	33.3016	412.893	1755510020	1443350020	108182000	129500000	223779008	739515010	460438016	435534016	188684992	349816000	139984192	108582000	734513980	791734020	755980030	677520000	844572030	1146370050	776097020	1152019970
LTFDEIQSK	P26320,Q157M5,Q7M1J9,P400017746,C5MR70,Q40459,Q84QE8,Q58H58	2	35.9284	540.786	618681090	474926368	165986160	208715296	278866112	451482528	370768864	449741472	233032960	267179392	471084992	181194080	472961280	441750720	447525376	360043200	291368576	525470176	404750688	378173024
RLTFDEIQSK	P26320,Q157M5,Q7M1J9,P400017746,C5MR70,Q40459,Q84QE8,Q58H58	2	32.9941	618.836	4544820200	3910729980	1229849980	1801840000	2281080060	3896420100	2578210050	3325210110	1945929980	2174619900	1816700030	1696419970	3036090110	3572559870	3881619970	3053550080	2661969920	4343989800	3525420030	5417909800
LPMFGCTDATQVLAEVEEAK	P26575,P26576,P26577,P400022435,P400022437,P400022438,P400045850,P400045852,P400045853,P22433,P69249,P69250,P26573,Q8SAQ3	2	64.6453	1105.03	null	null	null	null	null	null	null	null	null	null	null	null	null	null	null	null	null	null	null	null
LPMFGCTDATQVLAEVEEAK	P26575,P26576,P26577,P400022435,P400022437,P400022438,P400045850,P400045852,P400045853,P22433,P69249,P69250,P26573,Q8SAQ3	3	64.1582	737.023	null	null	null	null	null	null	null	null	null	599503	null	null	null	null	null	null	null	null	null	null
LPMFGCTDATQVLAEVEEAK Oxidation (M) @0.00100000000000000000.0	P26575,P26576,P26577,P400022435,P400022437,P400022438,P400045850,P400045852,P400045853,P22433,P69249,P69250,P26573,Q8SAQ3	2	58.0961	1113.03	259891696	255817488	14383600	105743840	416498304	304318176	342346912	272949728	118263824	298543936	201550688	144715040	345011488	304509984	175788816	131222336	471851392	433795488	314562336	345061568
LPMFGCTDATQVLAEVEEAK Oxidation (M) @0.00100000000000000000.0	P26575,P26576,P26577,P400022435,P400022437,P400022438,P400045850,P400045852,P400045853,P22433,P69249,P69250,P26573,Q8SAQ3	3	58.0878	742.357	81348096	72049800	150232992	34153300	174372000	169954000	141682000	73367600	41856900	78018800	78528704	54741100	164452000	98987200	44954600	55219500	173744000	195466000	115934000	116396000
LPMFGCTDATQVLAEVEEAKK	P26575,P26576,P26577,P400022435,P400022437,P400022438,P400045850,P400045852,P400045853,P22433,P69249,P69250,P26573,Q8SAQ3	3	59.4099	779.723	null	null	3875000	null	null	null	null	null	null	3740090	null	null	null	null	null	null	null	null	null	null
LPMFGCTDATQVLAEVEEAKK Oxidation (M) @0.001000000000000000000.0	P26575,P26576,P26577,P400022435,P400022437,P400022438,P400045850,P400045852,P400045853,P22433,P69249,P69250,P26573,Q8SAQ3	3	54.1046	785.056	550589060	762355260	734153790	315918784	1038586180	943047550	1020749820	714377090	328556352	882187970	378440800	377406208	751200000	816911490	569357890	447312256	1312483070	1388016770	898916030	1001895230
NGWVPCLEFETEHGFVYR	P26575,P26576,P26577,P400022435,P400022437,P400022438,P400045850,P400045852,P400045853,P22433,P69249,P69250,P400041818,P10647,P32764,P05349,P07180,P07179,P400034002,A9YTZ8,P26574,A9YTZ7	2	54.5819	1120.52	6586160	9357980	10103100	3805730	13377700	15430200	21418100	16836500	13821100	39871300	16898700	13817200	21957500	30947400	16599100	5281600	70082800	50771400	53670900	43556000
NGWVPCLEFETEHGFVYR	P26575,P26576,P26577,P400022435,P400022437,P400022438,P400045850,P400045852,P400045853,P22433,P69249,P69250,P400041818,P10647,P32764,P05349,P07180,P07179,P400034002,A9YTZ8,P26574,A9YTZ7	3	54.5007	747.35	92539504	141588992	198980016	75693200	248320912	252360656	288293376	214045568	181296000	488209984	197555360	162900000	271006144	350694400	210990192	133606000	782026750	632402300	624640260	625345340
KAYPQAWIR	P26575,P26576,P26577,P400022435,P400022437,P400022438,P400045850,P400045852,P400045853,P22433,P69249,P69250,Q40438,P32764	2	32.7548	566.819	146108992	227202000	189250000	70417904	330710016	346919008	328939008	223879008	93066096	309446016	100364000	87237104	315860992	301511008	265840992	null	494318016	489404992	380943008	460190016
KYETLSYLPDLSDEQLLK	P26575,P26576,P26577,P400022435,P400022437,P400022438,P400045850,P400045852,P400045853,P32764,P400041818,P10647	2	53.4671	1078.07	70242496	94291504	151490000	45414500	116435000	98999504	193907008	109190000	43792900	138254000	104380000	54418900	160218000	111119000	67637104	62738400	134311008	127894000	134639008	84736704
KYETLSYLPDLSDEQLLK	P26575,P26576,P26577,P400022435,P400022437,P400022438,P400045850,P400045852,P400045853,P400041818,P10647,P32764	3	53.0822	719.047	304582336	485064768	888242880	205444208	633867580	458068320	862361790	411638240	197267520	556367550	435231200	217476000	665060670	498833312	278413376	320917760	544193220	618828290	523980096	352752192
YETLSYLPDLSDEQLLK	P26575,P26576,P26577,P400022435,P400022437,P400022438,P400045850,P400045852,P400045853,P400041818,P10647,P32764	2	56.5569	1014.02	470031328	450695072	1009943230	229134064	876546820	513356832	704078530	418663104	228626144	685869760	535581760	298190912	818309180	605488260	313254496	405431584	762049540	686034940	643960510	663077440
YETLSYLPDLSDEQLLK	P26575,P26576,P26577,P400022435,P400022437,P400022438,P400045850,P400045852,P400045853,P400041818,P10647,P32764	3	57.2167	676.349	16541600	12273600	26418700	1961490	37039200	36005900	12285100	18450400	5456620	6730850	26785200	4370150	42850472	12887500	7336240	6515010	37110800	40276700	26816600	32821900
INGLPGVGEGNDLYPGGQYFDPLGLADDPTTFAELK	P27489,P400015035	2	70.6924	1875.91	null	null	null	null	null	null	null	null	null	null	null	null	null	null	null	null	null	null	null	null
INGLPGVGEGNDLYPGGQYFDPLGLADDPTTFAELK	P27489,P400015035	3	67.543	1250.95	241248000	121775000	null	285967008	234026000	108000000	237182608	129269000	190775008	171690000	78302200	84521104	51047800	193415008	241607008	142730000	81535696	94757904	284775008	172588000
WAMLGALGCIFPEVLEK	P27489,P400015035	2	68.8865	967.507	2636850	1213750	3300070	2878380	5177330	5272810	3706230	10048200	7133120	13400980	9018760	11025200	5241710	16456900	null	null	14129400	17574400	21759840	21038846
WAMLGALGCIFPEVLEK Oxidation (M) @0.00100000000000000.0	P27489,P400015035	2	67.3193	975.503	369547232	466056544	null	282646304	421491680	397048320	308292192	546042690	517275008	280751200	370803616	27884772	316419392	10805200	606584450	207479056	29063240	502471232	682953090	295843520
WAMLGALGCIFPEVLEK Oxidation (M) @0.00100000000000000.0	P27489,P400015035	3	65.3038	650.672	13803280	24606940	8469877	70212864	20283190	17320640	7357810	38655512	19471060	4372540	8802740	16161020	41441968	14846090	14417870	5065560	24983370	45086728	53637968	22122890
YLGPFSAQTPSYLNGEFPGDYGWDTAGLSADPEAFAK	P27489,P400015035	3	64.5073	1313.94	213376304	171504496	71971504	71691200	146820992	110318000	82793104	133952000	98481200	75493800	43696200	85470096	127314200	242177600	35345600	126197400	183101600	234875008	165527008	143130000
VDFKEPVWFK	P27489,P400015035,C0Z239,Q5DNZ6,P400033445,P400033446,Q9S7M0	3	46.2486	432.235	2767630080	2149349890	1227379970	1329820030	1272109950	2702700030	1783580030	2642830080	1619879940	1497270020	2359709950	1779789950	2278028030	2220379900	3001550080	1421081340	2295729920	3913550080	3389910020	3681210110
ALEVIHGR	P27489,P400015035,Q9S7M0,Q41993,Q42016,P400033445,Q5DNZ6	2	23.6884	447.763	443046016	387297984	88224000	231230000	398510016	465081984	312116992	483732000	358128000	414679008	321294016	230559008	390774016	591259010	692166980	607409020	570155010	986716030	787974020	1326070020
LAMFSMFGFFVQAIVTGK 2 Oxidation (M) @0.001001000000000000.0	P27494,Q84TM7,P14278,P400010908,P14279,PGSC0003DMP400007654,C0Z391,Q9S7J7,Q9SHR7,Q9SYW9,Q9XF86,Q9XF87,C0Z239,P400033446,Q2XTE0,P07369,P400023743,P400023745,P400023744,B8XLF1,Q41421,P400014555,P400014556,P400015464,P400015466,P400064602,P400013055,P400023742,P27491,O64449,P400023738,Q39141,Q39142,Q41447,P400023812,P400023813,Q8LCZ4,Q9C5R6,P400023740,P400023741,P400023739,P400014558,P400029202,P400…	3	71.6564	676.014	199920304	412024704	77903880	134511568	165643792	41947000	24266420	67255104	25636370	24213336	11443520	19585200	18387530	105337776	9159060	null	37150200	213570496	89383824	17711100
NRELEVIHCR	P27494,Q84TM7,P14278,P400010908,P14279,PGSC0003DMP400007654,Q2XTE0,P07369,P400023743,P400023745,P400023744,B8XLF1,Q41421,P400014555,P400014556,P400015464,P400015466,P400064602,P400013055,P27491,O64449,P400023738,Q41447,Q41426,P400023748,P400023739,P400014558,P400029202,P400015465,P27492,P27496,O64444,Q41423,O64443,P12469,P27493,P27495,Q41424,O64445,O64446,O64447,O64448,O64450,O64442,P07370,P40001…	3	24.2604	442.564	3004280060	2771369980	667940990	1616530050	3714010110	3999209980	2263470080	3976940030	3068400130	2936219900	2918010110	2146109950	3107379970	4731970000	5104719900	2480430080	5011250200	7981579800	6003070000	10674400300
SAPQSIWYGEDRPK	P27494,Q84TM7,P14278,P400010908,P14279,PGSC0003DMP400007654,Q41449	2	34.2702	817.406	1519580030	1148760060	306268000	489294016	738694980	1232979970	915872000	1155670020	894657980	761638980	843209980	638958020	976841020	1319840000	1161720060	1131849980	1037880000	1646829950	1363289980	1808179970
AKPLSSGSPWYGPDR	P27496	2	33.5046	809.409	7772334100	6783220700	2785571070	3412833280	3618574590	6040663600	3958580990	4228340990	2620483840	3375879940	3608157950	2386866690	5284901900	5469209100	5731181100	4422754300	3869009920	5235864100	4319450100	5660677100
AKPLSSGSPWYGPDR	P27496	3	33.445	539.942	1912422020	1529316990	332249600	523998592	691344380	1356152060	828609020	850864960	525780992	646732030	584535420	640739070	1365072000	1404099970	1577299970	1307627010	1033427010	1786755070	1242562050	1818908030
SGGNLVDPEWLDGSLPGDFGFDPLGLGKDPAFLK	P27525	3	68.7486	1177.59	2174140	null	8356240	7078790	9414130	null	8561540	4571750	8411270	6890380	3061280	null	null	8886250	null	null	null	null	15135100	7761970
APIDSTQLK	P29463,Q40568,P400039593	2	25.4627	486.773	85013200	120423000	23896900	31240300	46216600	57561200	49370100	32759100	20168200	40910700	43073800	19073700	59356900	62734100	78179904	72853504	47499200	79632000	64163100	41160000
RAPIDSTQLK	P29463,Q40568,P400039593	2	23.2372	564.824	286156992	322963008	93051504	175363008	233290000	259000992	173140000	167864992	76110600	169882000	153856992	66797200	182844000	205132000	250182000	293280992	157787008	253950000	223991008	319639008
MSAMSSATDNATELKK 2 Oxidation (M) @0.1001000000000000.0	P29790	3	23.0855	572.932	37011400	26990500	8217240	24858000	23041100	25289900	16773200	12356800	12289800	16522800	12362500	11487000	29418400	23931700	49382800	28928400	6614410	46006500	19224800	33022700
TAIAEGLAQR	P31541,P31542,P400025093,P400025512,P400036498,F4JF64,Q9FI56,Q9M2Z6,Q9SXJ7,Q93ZM4,P400025511,O48931	2	28.4975	515.289	192669696	182415296	55857800	45277100	170391392	166613888	110902000	140352096	42575100	79371200	45843008	20222100	119382200	91725600	82385000	92683296	76128808	70547200	46871600	80758800
VLELSLEEAR	P31541,P31542,P400025093,P400025512,P400036498,P400025510,F4JF64,Q9FI56,Q9M2Z6,Q9SXJ7,Q93ZM4	2	42.5218	579.824	39495500	39314300	35073200	13130000	36766500	37671600	31133100	27663300	8493350	37651400	22388600	11580600	29228700	20669800	17267400	27814700	43797000	46376200	37525500	43143400
HIEKDPALER	P31542,P400025093,P400025512,F4JF64,Q9FI56,Q9M2Z6,Q9SXJ7,O48931,P31541,P400025511,P400036498,Q93ZM4,Q42192	3	18.6118	403.219	3853460	8883320	4144450	1477150	9644190	7270110	4568130	4767050	2569740	7270040	3761150	2018680	7928860	4287710	4211170	5692270	10127000	10052900	6611710	8956880
VKEIELQVTER	P31542,P400025512,P400025511	3	30.4405	448.591	24465200	29435300	10660900	6545240	21746500	19717500	13497200	null	4689160	18153400	10131900	6685010	24203700	15416300	18457000	27389000	28124300	28661400	21787800	27963700
VIMLAQEEAR Oxidation (M) @0.0010000000.0	P31542,P400025512,Q9FI56,O48931,P400025510,P400025093,P31541	2	30.0724	588.31	35395900	34486800	25539300	9943060	47987100	37187300	18862900	22187300	5634580	23664500	15898600	6096900	35368500	20346200	18863300	35045900	26463700	30723100	21701500	20328100
NTLLIMTSNVGSSVIEK Oxidation (M) @0.00000100000000000.0	P31542,P400025512,Q9FI56,O48931,P400025511,P400025092,F4JF64,Q9M2Z6,Q9SXJ7,P400025093,P31541,P400036498	2	44.2168	911.489	31554100	35734000	52817800	13542300	39715100	39553000	25275400	24629000	6992280	29640800	19629100	10326600	35819600	15094400	23299000	19813700	24955700	26515700	21236900	18442200
NPNRPIASFIFSGPTGVGK	P31542,P400025512,Q9FI56,O48931,P400025511,P400025092,Q6ST30,F4JF64,Q9M2Z6,Q9SXJ7,P400025093,P31541,P400036498	3	48.5641	653.69	28787100	43444600	64612000	21115000	75764200	39430200	38602500	30236100	11148600	45292112	27726300	21018100	56144100	31430300	31422400	27667050	50541500	61810500	47811700	30241410
AIDLIDEAGSR	P31542,P400025512,Q9FI56,O48931,P400025511,Q6ST30,Q94C10,Q42192,F4JF64,Q9M2Z6,Q9SXJ7,Q93ZM4,P400025093,P31541,P400036498,P42762	2	38.7858	580.304	50206700	52740300	67456496	16998100	39835300	37234300	37903200	32279200	11657600	46306900	28084000	14451800	54516300	35384200	28199600	41245600	48956400	55162100	40039700	45105000
IIGGGLPVGAYGGR	P31593,Q40147,Q42522,P42799,P400055596,P400055597	2	40.9334	643.867	13414300	27782100	52737800	7351770	39205000	35682700	32999200	21454000	5387960	36978200	10278300	5985030	44338400	13053700	18242300	27552900	45671600	43827900	32595600	33133300
LPMFGCTDATQVLAEVQEAKK	P32764,P05349,P07180,P08706,P07179	3	58.4224	779.392	null	null	null	null	null	null	null	null	null	null	null	null	null	null	null	null	null	null	null	null
LPMFGCTDATQVLAEVQEAKK Oxidation (M) @0.001000000000000000000.0	P32764,P05349,P07180,P08706,P07179	3	51.7104	784.728	39534700	62197200	48765600	23303700	144434000	92286600	71170800	57572400	24797200	62096000	42157700	30172800	74106400	95428000	86979904	44036700	119560000	104180000	77614800	140015008
LPMFGCTDATQVLAEVQEAK Oxidation (M) @0.00100000000000000000.0	P32764,P05349,P07180,P08706,P400041818,P07179	2	55.1793	1112.54	253436992	261669488	255962000	109116320	396088992	252286368	334685600	247015520	112510000	294383840	199544032	123292592	328822496	327561024	191961664	131866000	416300608	390573088	312756896	437661376
LPMFGCTDATQVLAEVQEAK Oxidation (M) @0.00100000000000000000.0	P32764,P05349,P07180,P08706,P400041818,P07179	3	55.3188	742.029	79048800	67821696	75146640	30087900	148484000	99716000	110807000	61981200	25629400	59325740	49693300	32680700	170784992	89941600	49183600	48779000	138148000	171894000	109387000	153449632
SPGYYDGR	P32764,P05349,P07180,P26575,P26576,P26577,P400022435,P400022437,P400022438,P400045850,P400045852,P400045853,P22433,P69249,P69250,Q84QE5,P400034002,A9YTZ8,P26574,A9YTZ9,A9YTZ7,P07179	2	20.7857	457.704	251315120	282189856	316026720	92397760	529612512	256787184	425149632	393685280	108095008	220483760	193399776	109852208	418529600	276560256	253987072	150426176	365223392	508920896	420037312	571594620
VYNTLTDTELAVVTSVVK	P32980	2	59.9174	976.538	222662000	192092000	140708000	123977000	145031008	142091008	120987000	187768992	123269120	142866000	161929808	122002000	132338000	199176992	167864992	136466000	155792992	258456000	205428000	240444000
VYNTLTDTELAVVTSVVK	P32980	3	59.9549	651.361	61613700	51859100	55289800	35022500	51558100	47955900	34957600	46298900	31914500	34512900	44974100	35169200	47008700	60221760	null	46848000	53686300	104854000	66579100	79792400
IQQLTEER	PGSC0003DMP400000272,PGSC0003DMP400000273	2	23.2118	508.773	132652000	117554000	35719100	70456800	100554000	105691000	88606496	117974000	57904800	63311800	71543504	44107800	98526496	87779200	110522000	94643200	68826304	120040000	103481000	133490000
IQQLTEERK	PGSC0003DMP400000272,PGSC0003DMP400000273	2	18.7643	572.82	4601050	4266090	672395	1129700	3700240	3709710	2286170	5597930	2127550	1651040	1664950	1330150	3365420	4146970	4505150	3719380	2829120	5265200	4062830	6513000
TIQNEINELKK	PGSC0003DMP400000272,PGSC0003DMP400000273	2	34.5325	665.375	71968000	41041300	7831290	12029000	18633200	38272300	30909000	41713000	19872900	23141400	17332200	12585400	34882200	39696200	41498000	56937800	39339800	58450500	47810400	59162100
TIQNEINELKK	PGSC0003DMP400000272,PGSC0003DMP400000273	3	34.5337	443.919	269951008	183616992	56173200	78548000	104807000	163751008	125630000	173539008	100297000	106793000	100629000	74298304	148186000	168915008	162631008	189467008	156920000	220530000	190808000	209780992
ASSSEESGAVDTSELLTDLK	PGSC0003DMP400000445	2	49.2602	1019.99	25880000	19031900	18317600	8509340	20745200	13805900	null	15024700	8401350	null	28460600	null	20096300	21773000	21099500	13336300	19903900	27209900	28750700	34467200
ELAEDIEQLK	PGSC0003DMP400000445	2	40.7426	594.314	262207008	299047008	137516992	147584000	215814000	273712000	224016992	378156992	228002000	216924000	256366000	182076000	241364000	326868992	489515008	322484000	443788992	729764990	579075970	780921980
ELAEDIEQLKK	PGSC0003DMP400000445	2	36.0883	658.362	161901408	119453296	21714900	39116200	60428900	107331504	69335600	118864400	65925600	70114496	113533800	46267500	68526496	148406992	168632496	140013408	154521008	163894112	176682000	315714016
IMELVGLGYTGWFVYR Oxidation (M) @0.0100000000000000.0	PGSC0003DMP400000445	2	62.838	960.494	7154660	2908790	1468450	2262170	2524550	null	732319	6764220	3404990	null	null	null	null	5329040	null	3945370	6362210	3548450	6585300	709561
KELAEDIEQLK	PGSC0003DMP400000445	3	35.9246	439.244	397353984	335631008	59207700	105318800	148390496	277665696	172131296	271236000	165289792	155907008	262067808	124270304	174614096	370204992	419052000	305441280	375544000	428163008	478360000	775222020
EVGSPDIR	PGSC0003DMP400000457,PGSC0003DMP400000458	2	22.7382	436.728	147356992	156704000	46049500	52269300	118607000	129156000	86396704	148452992	63254900	71043296	61205000	42822100	102748000	104268000	127782000	108584000	91152000	140788000	113600000	145576992
GWLNSSLPWILPK	PGSC0003DMP400000457,PGSC0003DMP400000458	2	63.9265	755.928	16995100	11239500	17869100	13388700	15582700	12928900	11061700	28411300	18512100	20918400	12093600	11879400	9499950	18342700	null	9595240	22544600	22025300	24557300	6872490
SEDKTGFLK	PGSC0003DMP400000457,PGSC0003DMP400000458	2	23.949	512.77	15545900	9862730	4431070	9314140	11787900	12043200	7213900	14932100	6812650	8323540	5641380	3817470	10362300	10597700	11852800	10669500	7219770	11424200	10677700	15098400
TLQQVDEFLSTK	PGSC0003DMP400000457,PGSC0003DMP400000458	2	47.7074	704.873	119146000	116686000	117523000	76046000	82650400	131929000	83978000	165048992	72104800	78409200	105175000	81782096	118510000	108781000	117963000	65120500	90654800	146316000	114740000	90738200
VEATSPPTPEVNAVPNAEVK	PGSC0003DMP400000457,PGSC0003DMP400000458	2	36.8841	1025.03	31176400	24922700	18552300	12512500	19696600	17942800	19524400	24880500	13235500	15236300	23581700	11598300	14909900	18032600	19796200	16992600	13003900	20307700	17192300	16245500
FKEPENTTLFILDK	PGSC0003DMP400000457,PGSC0003DMP400000458,P400034518,P400034519	3	46.6853	565.641	39161600	46238600	51480000	26389500	24801200	37785400	43343100	55586900	24834200	30951100	41090700	32515900	51140800	34927700	38289600	19642200	24782500	35030100	36224200	22725800
KLLFAEDR	PGSC0003DMP400000457,PGSC0003DMP400000458,Q0WWP1,Q9M158	2	30.5157	496.284	50478000	42657500	15731800	20482400	25499700	25791800	27300700	37534200	22322600	26431700	25610900	17295500	34391900	20981700	35268040	39153100	29786800	48369100	32319300	46545000
KLIAEIK	PGSC0003DMP400000640	2	27.9239	407.775	39523300	19832900	5174840	13150700	26803500	35268100	11412800	34769800	20124800	16043100	17547900	13164100	20129500	46376000	39062400	36305900	36164700	75343200	32815200	70871904
NEDFINEAPK	PGSC0003DMP400000754	2	33.1012	588.783	18510400	17278600	9583920	7111580	12624800	16261200	8922750	16290600	7541580	12796700	6999850	5733020	11408700	10872100	12879800	11857600	10391000	18270500	12497600	17502400
IINEPTAAAIAYGLDKK	PGSC0003DMP400000783,PGSC0003DMP400000877,PGSC0003DMP400000878,PGSC0003DMP400000879,P400015292,P400015694,P400019802,P400021684,P400025001,P400025002,P400032316,P400033372,P400042780,P400048253,P400049887,P400049888,P400052917,Q9LKR3,Q39043,Q03684,Q03685,P49118,P22953,P24629,P22954,P27322,O65719,Q9LHA8,Q9C7X7,Q9S9N1,Q84QJ3,Q40151,Q67BD0,B7U9Z3,Q0WUQ6,Q40511,Q67BD2,F4KCE5,Q67BD1,F4K007	3	44.5356	596.671	34817400	27234100	40587900	15936100	16862800	41349000	13918700	50894000	12365600	31977900	35904300	10876000	28089100	17566700	42599800	36039000	51417900	68179696	57033400	49135800
IFETIGAFK	PGSC0003DMP400000901	2	45.7832	513.289	146899504	110719896	51536500	98484880	57801300	146237104	88434400	140013792	79573184	71788096	123554992	93698144	174560704	121517696	183227088	104031696	81668200	220571904	169374896	188573504
IVNLPEIR	PGSC0003DMP400000901	2	41.6426	477.294	null	null	17916300	null	13348800	14268800	21902500	11993800	null	null	7924100	4779250	26522600	9964180	null	14547800	47982900	null	20706300	null
QIFGSVTAQDLVDIIK	PGSC0003DMP400000901	2	61.823	873.99	8091190	4848000	12145400	3449350	11407300	4566520	6286500	8638280	4362560	9510100	7334960	4225860	7499870	8241940	4569530	6831480	11472400	13540300	9809630	10982600
VKDEAQQLAR	PGSC0003DMP400000901	2	19.2254	579.317	2715970	2735560	1521940	488800	4304870	3372600	2758900	3731610	1314710	2880960	1596920	780127	3445430	3122850	2955620	3222710	4237160	6268080	3891750	7724280
SSDIEDTQNDEQDSSSK	PGSC0003DMP400000902	2	19.4455	942.883	5175480	4320840	2741600	3237560	5524260	4932120	4003790	7067900	3681400	3111800	4007940	3223440	4448970	4387360	5093360	2634710	2084580	5631480	4032840	5944570
LTFTPTQADR	PGSC0003DMP400000902,Q8W5A3,A9YTW3,A9YTW4,Q9FYC2	2	32.3823	575.301	22879000	25145500	8790010	9987000	14685800	21073240	13193800	25958320	13641400	13184896	8750890	10304000	24610720	19232300	24009970	22032340	13205500	26434200	16388200	29508080
LGVSAASFAPAAVVAAPGGAAADAPPVVEEK	PGSC0003DMP400000951	3	52.0796	930.832	21803600	29996600	35169700	12578800	55232400	21808100	26267000	32890600	14117300	20465200	18085400	15566600	44490000	20126400	13280500	14347000	12045800	24254400	17169200	null
VVQLGDEISNLTLADAQK	PGSC0003DMP400000951,Q0ZII1,P24929,P36688	2	50.8854	957.517	57984400	64909800	85917464	40980200	120862000	71534304	65324900	69702400	44894100	53140200	59873700	44339800	83642200	79329696	68913200	47210200	64920400	115380000	59098200	89730400
VVQLGDEISNLTLADAQK	PGSC0003DMP400000951,Q0ZII1,P24929,P36688	3	50.9301	638.681	13985700	18904100	19088700	7632970	39673200	20423300	12789100	14328800	7010220	7990010	14061100	7413040	23784000	17272500	15796200	10665800	14479500	34516700	17137900	23024700
VVQLGDEISTLTLADAQK	PGSC0003DMP400000952	2	52.0231	951.019	56825100	54223700	66695000	33108600	121454000	57806100	60577000	79396496	37019400	50386500	45709900	39266500	79429296	71793696	47009000	42629400	55979100	94160000	55315000	69574704
TEFDVVIDEVPSNAR	PGSC0003DMP400000952,PGSC0003DMP400000951,P24929,P36688,Q0ZII1	2	47.7821	845.922	48473200	42154200	73850896	24027100	67387000	45059600	57947900	74006600	30293200	46669900	48098100	31233800	69793600	49127100	47684800	31926700	36924200	54971100	39439200	35188000
LVEYLQDK	PGSC0003DMP400000952,Q0ZII1,P24929,P36688,PGSC0003DMP400000951	2	32.4977	504.276	173188000	131565000	54351500	36961200	134087000	101684000	106206000	126336000	57534500	82903696	47266200	42043800	132787000	99548704	89739904	105047000	82265600	126756000	81924200	123039000
AELGPVAAAR	PGSC0003DMP400000965,Q5NE20	2	27.797	477.772	68677400	77957800	2411760	15499200	42907100	57349400	26948200	51397300	17942000	20023700	17761300	12586300	48005000	36092100	24127000	31326600	38874300	55956000	24108200	29513500
AFDPVEHMK	PGSC0003DMP400000965,Q5NE20	2	33.5906	537.259	null	null	1693960	null	null	null	null	null	null	3206210	1118180	1398460	null	null	null	null	null	null	null	null
AFDPVEHMK Oxidation (M) @0.000000010.0	PGSC0003DMP400000965,Q5NE20	2	22.7936	545.257	30602300	33531500	13862900	11972887	48577000	44982500	39496100	33831500	12297000	35837100	14306700	9940938	42338700	37095200	30690600	45773800	57233400	57322400	41545500	67797600
GLMSLPEDGSESTAFIEDWVK Oxidation (M) @0.001000000000000000000.0	PGSC0003DMP400000965,Q5NE20	2	59.578	1164.05	128558000	114459000	132698000	59254100	155820000	102549000	133288000	113000000	42807500	88052600	47817000	57416200	91113696	117456000	null	72967904	120836000	120246000	83754896	84859200
TEKYDTNPALYGELAK	PGSC0003DMP400000965,Q5NE20	2	37.6479	906.958	72995000	60317700	46821600	11788200	39623900	50086400	59943100	50418200	16453800	47231700	29355500	17699900	64658400	61316100	34662900	47872700	75534600	83320496	55366600	89025504
VCPSHVLNFQPGEAFMVR Oxidation (M) @0.000000000000000100.0	PGSC0003DMP400000965,Q5NE20	3	47.1773	702.011	91065296	121674000	139860992	42441800	136056000	199124992	163252992	129541000	47586300	144214000	123309000	97192000	186360000	157488992	113066000	59347400	204448992	251348992	158963008	216226000
VDQITAELK	PGSC0003DMP400000965,Q5NE20	2	32.5494	508.787	86768200	82197104	25688000	18293700	43801200	69677400	47946500	57837500	17557900	37886900	22783000	19333600	68331000	55021700	46608700	71255696	61303900	72836400	53664600	65594100
YDTNPALYGELAK	PGSC0003DMP400000965,Q5NE20	2	40.8055	727.865	185576992	288040000	288708992	108405000	339224992	315945984	418399712	267448992	84916600	222914000	162043008	121989000	384752992	192320000	221414000	285705984	282044992	312238016	221536992	279521984
YSGVGAAIEYAVLHLK	PGSC0003DMP400000965,Q5NE20,A4D0J9,A4D0K0,P27141,O64452,Q8W183	3	61.9261	564.313	50953300	40497500	83759504	35011080	109944000	64474500	78697200	84725400	44291448	96720304	51787720	43554824	101148000	62767800	null	41542632	126093000	134955008	96270800	65708400
FMVFACSDSR Oxidation (M) @0.0100000000.0	PGSC0003DMP400000965,Q5NE20,P27141,O64452	2	36.7671	618.265	297155008	267696992	148659008	70478400	218448000	266472000	300460992	223584000	58313900	158255008	126868000	62907200	275964992	214688000	164391008	156899008	206306000	235806000	144462000	133302000
NIANMVPAYDK	PGSC0003DMP400000965,Q5NE20,P27141,O64452,A4D0J9,A4D0K0,Q8W183	2	42.5543	618.309	null	null	1374070	null	null	null	null	null	null	1875910	null	null	null	null	null	null	null	null	null	null
GGYYDFVK	PGSC0003DMP400000965,Q5NE20,Q56WK1,P27140,P27140-2,Q56X90,P27140-3	2	38.3803	474.729	334971008	295052992	309254016	111334000	294089984	323495008	392529984	338020992	92274600	263563008	199434000	131663000	391374016	327102016	209812992	330588992	333244992	375113984	250188992	357871008
IPVLLEPKPEES	PGSC0003DMP400000966	2	41.8843	675.883	68603504	55521900	39130500	30652900	37689000	58554700	44821500	89069696	33945200	33759200	47734300	20765100	55199600	28933300	33485600	36116100	52049400	89083296	62573300	73448200
LFQENTPSVVYITNLASR	PGSC0003DMP400000966	2	53.9247	1026.55	29883270	26159410	13186000	26326990	20293300	24671550	22393100	31070300	19952408	18872000	24375300	13259100	16015400	25808610	18297100	15540200	22801400	30007200	32622000	37961700
LILGDIITSINGK	PGSC0003DMP400000966	2	57.7003	678.912	32157000	23057100	18022230	21949100	32266500	23925100	24388000	27404900	21838800	18020700	33474500	14004800	30203000	24904700	18620800	17840700	22322700	32164200	33163300	35708000
LRPIPIGVSADLLVGQK	PGSC0003DMP400000966	3	50.2376	592.699	21756900	18425200	16571800	18413300	23599200	17097100	18368800	29318800	12322500	13295600	20460800	8821820	19531800	14933800	16392300	11062300	16171100	31654400	27043000	24664600
VIVEVLR	PGSC0003DMP400000966	2	36.8309	414.273	62744900	46884400	13959900	17299700	23236800	36321000	34792200	47642100	23862500	24951600	39198900	9178600	35723500	27352800	37810600	36168300	31799800	57638300	44293500	33054700
VSNGTDLYR	PGSC0003DMP400000966	2	24.4535	512.758	17040520	11445500	4436230	9425350	12787700	14769900	9279880	18099000	8070700	6380950	8102460	3240190	9231330	9333620	12644700	11842400	8953500	13271400	12211600	15165200
VTLADQTTYDAK	PGSC0003DMP400000966	2	29.4999	663.335	48673900	40862400	12157100	20269000	49145800	44538700	24617400	49975500	29657600	22058700	31992900	16424500	19275500	40531100	null	39052000	27273400	60501000	23775300	43994500
VVGFDQDKDVAVLHIDAPK	PGSC0003DMP400000966	3	43.5658	689.372	13176300	7444840	9879890	7707070	9439540	14791400	11589400	25275500	14038800	14996300	18917800	8692400	12530200	6225090	16507300	10059400	14110500	22735000	18448200	25464700
KLQTDELATVR	PGSC0003DMP400000966,O22609	2	29.3268	637.362	17333200	15309900	3378760	5823090	16973200	19717500	11807700	22885400	10878900	8318550	8199700	3248170	8701080	12547000	14452800	14837300	15162100	26732000	13669400	26025600
KLQTDELATVR	PGSC0003DMP400000966,O22609	3	29.2979	425.243	30057100	35528000	7805610	13946000	24644400	30837400	18393800	35408700	18446100	14178400	20861100	6341820	16116700	22143000	27172700	25722700	21492700	40401800	19347400	39729160
VFAIGNPFGLDHTLTTGVISGLR	PGSC0003DMP400000966,O22609	3	61.0339	795.773	12593000	6339650	13024500	11982800	9195550	10601200	11586900	20368900	17463500	18735800	24100000	11385000	17678570	16025300	9771420	9657430	13208600	18132100	31061100	21699000
VTRPILGIK	PGSC0003DMP400000966,O22609	2	30.4952	498.833	19573500	14752900	2545660	3597560	8970240	16346100	9867810	17620300	6991790	7340020	5842530	2424680	11735000	5953050	12452600	17868000	10266500	19763600	13798600	17674000
EVQKPLEDITDSLK	PGSC0003DMP400001052,PGSC0003DMP400001053,B3H5B8,B9DHS6,Q9SSA5,PGSC0003DMP400001056	2	42.6657	807.936	83967800	52935300	27763300	24014800	38167200	44433400	42992000	96056800	37720400	40429700	42426500	13081500	44722800	30641800	40462900	42741900	47518400	61384400	61184600	66431800
LPFNAFGTMAMAR 2 Oxidation (M) @0.0000000010100.0	PGSC0003DMP400001052,PGSC0003DMP400001053,PGSC0003DMP400001054	2	43.6386	729.85	137544992	90345504	71790304	56023800	74056704	111956000	89734600	139654000	70089104	63969800	61331400	26170400	99340200	54357500	93089600	52843000	76533528	96534000	83728496	80738600
EVQKPLEDITDSLK	PGSC0003DMP400001053,PGSC0003DMP400001052,PGSC0003DMP400001056,B3H5B8,B9DHS6,Q9SSA5	3	42.6011	538.96	123600000	90564096	51969000	60756600	78191400	87318896	80057536	152004992	73820600	69308864	91656896	35833400	85258096	59417700	63628800	68025600	88466600	122160000	105411000	108516000
YALPIDNK	PGSC0003DMP400001053,PGSC0003DMP400001052,PGSC0003DMP400001056,B3H5B8,B9DHS6,Q9SSA5	2	35.1463	467.259	178058000	121993000	48843800	52282000	70437600	115637000	77356496	132452000	79219696	79371696	73783200	30399100	100585000	84732096	102709000	145280640	80292496	134972992	106568000	140374000
EEFENNSASSQVFWLLK	PGSC0003DMP400001053,PGSC0003DMP400001054	2	58.4437	1014.49	7501050	6265380	6092020	7656830	5451980	5897850	5029680	9823840	12355200	11294300	17982900	6238280	7533780	11702100	10253500	7736560	12583100	19915300	20101900	20368300
ESELTPSNANILDGR	PGSC0003DMP400001053,PGSC0003DMP400001054	2	39.6402	808.403	126150000	78488400	54080200	34090200	72669504	75882496	57419500	null	61134500	55668900	72395296	24245900	72406704	68846496	82252496	72765296	64655500	104632000	77169696	94989200
VGDVIESIQVVSGLDNLVNPSYK	PGSC0003DMP400001053,PGSC0003DMP400001054	2	64.0868	1223.15	42236100	36318500	23866400	17886300	35642700	22436200	18906400	47944200	27863100	27978300	28834600	13628400	15874500	31436600	27462800	18832400	29146900	40884200	42045300	28645900
VGDVIESIQVVSGLDNLVNPSYK	PGSC0003DMP400001053,PGSC0003DMP400001054	3	64.1225	815.771	18755000	17504600	13613300	30936500	33093400	16191300	12912400	41588800	20656000	13776400	15219900	9562580	15410300	16684000	null	12798400	20242600	35496600	30538000	13740700
YAVFGYVTENEDFLADLK	PGSC0003DMP400001053,PGSC0003DMP400001054	2	62.4083	1047.51	39185400	24294000	16150000	21123700	31179750	10910300	12073300	34499800	20193600	16319200	10708700	6404220	17311200	17920800	13942200	18612300	20120600	23999500	26273000	11691700
ADGFVVQTGDPEGPAEGFIDPSTEK	PGSC0003DMP400001053,PGSC0003DMP400001054,PGSC0003DMP400001052	2	49.723	1282.1	34736200	23753600	22626000	20053400	28230200	18887900	16034300	28326700	21843200	17735000	23426500	11056100	20629300	22395000	27238300	13588400	18169500	30882100	21990600	28669500
ADGFVVQTGDPEGPAEGFIDPSTEK	PGSC0003DMP400001053,PGSC0003DMP400001054,PGSC0003DMP400001052	3	49.7496	855.07	16457300	11428000	10273600	8897680	16465000	12491400	9666520	14789500	null	4810750	8267160	3456180	16376000	12255500	12478700	11226600	7711060	18251600	11151200	11583600
APFYGETLEDLGLYK	PGSC0003DMP400001053,PGSC0003DMP400001054,PGSC0003DMP400001052	2	56.5261	858.434	123296000	72706000	76242200	74657696	101172000	82552000	71031904	98249600	86157000	75611800	112794000	43399600	90812000	83322800	70975200	63291900	74124200	104408000	115552000	108406000
HFYDGMDIQR Oxidation (M) @0.0000010000.0	PGSC0003DMP400001053,PGSC0003DMP400001054,PGSC0003DMP400001052	2	28.2065	649.287	null	23440100	14159100	null	29937500	28293900	18939900	40343100	24197000	22722200	26470200	8947100	20867400	25384700	15870200	14751800	14818100	29867200	17028800	22013500
IVLDGYNAPVTAGNFIDLVER	PGSC0003DMP400001053,PGSC0003DMP400001054,PGSC0003DMP400001052	2	61.5485	1138.6	82117328	56294648	63979632	57942380	73403152	58418632	51841720	107742288	68929720	59358392	76985192	34017120	64048168	59614112	45823128	43561992	60225840	85538776	77461624	72814016
IVLDGYNAPVTAGNFIDLVER	PGSC0003DMP400001053,PGSC0003DMP400001054,PGSC0003DMP400001052	3	61.4878	759.406	23832020	18693620	16413900	21097232	27385650	24595320	14068830	23819000	21658100	12913200	27342830	12349931	28326640	21087300	11108700	15335940	22320610	44607840	32381980	26066750
TIPLEIMVVGEK	PGSC0003DMP400001053,PGSC0003DMP400001054,PGSC0003DMP400001052	2	57.0736	664.879	null	null	null	null	null	null	null	null	null	null	null	null	null	null	null	null	null	null	null	null
TIPLEIMVVGEK Oxidation (M) @0.000000100000.0	PGSC0003DMP400001053,PGSC0003DMP400001054,PGSC0003DMP400001052	2	46.2616	672.879	135982000	86878600	68477504	56006800	54843600	111935000	71882304	131619000	63014200	54747000	86951600	27838400	93171600	51758400	75635600	49799300	65693400	106770000	92952400	100544000
VKDNPNLEECVFR	PGSC0003DMP400001053,PGSC0003DMP400001054,PGSC0003DMP400001052	3	36.5056	540.602	79055400	80425696	28678100	40251300	65052500	86881800	59261800	111132000	67492400	65056600	105369000	27925200	79273600	60620400	72353296	42414500	78671696	108208000	91368600	97994496
ATHICLDCGYIYTLPK	PGSC0003DMP400001140	3	46.2947	642.318	22539600	23402900	21969000	13632700	17477100	37168200	24105400	35112400	29025700	31943000	51210700	27789600	34455400	24329200	36007100	7245580	44481900	79817200	60523900	91319400
NIEVEVDKPLGLTLGPK	PGSC0003DMP400001140	2	47.7504	911.524	65572600	52244100	36797300	26698700	47631700	55647600	51991600	77009696	33891100	50021100	74266800	43850200	53358600	62264200	68016704	33884400	50823700	77829296	65930100	64474300
NIEVEVDKPLGLTLGPK	PGSC0003DMP400001140	3	47.756	608.019	197663008	182204000	127845000	112456000	140588000	162178000	166980000	196595008	120523000	148271008	214840000	130021000	174358000	192731008	200760000	105572000	161168992	248203008	208964992	206095008
QGGGVLITGIENGGNAAR	PGSC0003DMP400001140	2	39.7584	842.446	161726000	119004000	61944800	62497900	91823296	102039000	83449600	104096000	64684000	79565600	102427000	58836700	81712000	97184000	117753000	90785104	77413800	140480992	99127296	155448992
RPAPPQFGR	PGSC0003DMP400001140	2	24.0835	513.287	178687008	126755000	46328000	105648000	166064992	177410000	126443000	178835008	90101400	122900000	113866000	66932100	119061000	153191008	160306000	144650000	104122000	165128992	154696992	275937984
SFDEQPEDYACPQCIAPK	PGSC0003DMP400001140	2	41.268	1077.96	69812496	56041400	51539300	37944400	45112700	62210900	48936800	57121700	41519300	51818800	57660500	36919900	52397400	45032000	67693400	19341200	45807400	77502304	44138700	86301200
TAIQAKPDSVYFVISR	PGSC0003DMP400001140	2	43.9334	897.995	82868304	48955500	32069600	15600600	28559300	82503504	46243300	54584100	27732500	39906300	28055800	22075200	40164000	39237600	76657000	37413500	55025000	85323104	62001600	98763104
TAIQAKPDSVYFVISR	PGSC0003DMP400001140	3	43.9325	598.999	333995008	256288000	154316000	131876000	175638000	376527008	212684992	268079008	140811008	198675008	205355008	139894000	221100992	203968000	330838016	154972000	257840992	427440992	308072000	491436000
VGDQVVYTSSFFGDELWPADK	PGSC0003DMP400001140	2	59.8988	1180.56	38977100	34722600	26744700	23537600	29965000	21842200	22293200	32340100	26696600	28749000	23053000	18192600	17681000	33864100	23865400	17909400	23899700	39512400	31884500	36263600
YDVNTGR	PGSC0003DMP400001140,PGSC0003DMP400001139	2	19.0719	412.699	10235000	19026100	5905070	8034240	15172200	13429200	7862010	17664946	4479073	2918340	13686728	8273230	14056100	null	7094670	2254700	4914730	25302700	19977700	32942600
GLFLLDK	PGSC0003DMP400001282	2	43.669	403.249	38517140	40059152	60118580	12336560	39590288	53193640	62265072	42630300	15578550	45218192	25278820	15749500	56946340	22043130	31534750	24629070	44573300	56719800	43456000	48473300
VTVISGLTGQDR	PGSC0003DMP400001660	2	37.7212	623.346	51679800	32615200	18735300	13996400	25543800	28258500	24774900	29138100	15428800	18772100	21625000	13419900	31689000	37289900	27519000	22024900	27632500	48255200	40137500	60202600
MGLSDKEIVALSGAHTLGR Oxidation (M) @0.1000000000000000000.0	PGSC0003DMP400001694	3	41.136	657.686	7065730	7981650	10931000	6112120	10651000	15595600	9435100	12558700	9301260	11691900	12277600	9520670	13912300	9941080	21296200	13058200	11994200	16703000	16340900	23898100
VDVSGPEECPEEGR	PGSC0003DMP400001694	2	27.6519	780.338	null	1157880	null	606566	1859210	null	null	2162820	1032620	1064610	846243	620654	1550740	1477410	644394	null	null	2043050	null	null
YAGVTYADLFQLASATAIEEAGGPK	PGSC0003DMP400001694	2	71.4819	1272.14	null	null	null	null	null	null	null	null	null	null	null	null	null	null	null	null	null	null	null	null
YAGVTYADLFQLASATAIEEAGGPK	PGSC0003DMP400001694	3	68.1284	848.431	6303520	7578760	5029060	7748700	8048410	2784500	4643800	9629040	3802680	7153850	6034980	4527250	5285780	3949660	4452530	4570090	4588210	5150370	6220880	5377120
YAVNQDVFFK	PGSC0003DMP400001694,Q3SC88,Q9TNL9,Q9XPR6	2	43.9569	615.814	18533900	14831700	21686500	7907120	12464400	19389600	19632000	17248200	11011900	11340700	17699700	7237830	20403200	8870410	14717800	7495510	10356600	17028600	14295100	16458500
HGANAGLVNALK	PGSC0003DMP400001694,Q3SC88,Q9TNL9,Q9XPR6,D2SLU7,B8YGQ6,Q8LSK6,Q09Y74	2	29.0448	582.83	15719500	16353300	8006680	6409690	22059600	22623600	14398800	23256500	12783300	21284900	16143700	10278500	20168800	19534500	22091600	20019400	26033000	40292500	19711400	39619900
IEKNSIGGR	PGSC0003DMP400001863,PGSC0003DMP400001864,Q8L6B8	2	34.6828	487.271	170791008	290780000	762889980	65033900	94338600	136478000	112324000	162384480	80509504	210200112	221655472	193279008	78511104	181588000	127334000	212644992	424508000	236476000	186731184	477195008
GSDINPQEAQQTLEIAEANVK	PGSC0003DMP400001921,Q2MI94,Q2MII1,Q27S44,P400043561	2	50.3891	1128.07	670856000	556705790	426890720	439583136	514171552	472925056	398006016	580752640	339870176	417056768	725448960	404494016	415133824	698104320	713107580	345662272	497143456	679516030	648730300	844757120
GSDINPQEAQQTLEIAEANVK	PGSC0003DMP400001921,Q2MI94,Q2MII1,Q27S44,P400043561	3	50.1962	752.377	297726912	316971296	197796304	227748000	319906816	341196608	239153296	309910400	225054688	260888992	377676992	311963008	313812192	478943776	454116000	278445184	438659008	681009980	584311040	729675010
IGNNEITVLVNDAEK	PGSC0003DMP400001921,Q2MI94,Q2MII1,Q27S44,P400043561,Q3C1J6,P00834,Q33C28	2	45.7366	814.932	1555805570	1172745730	735917820	704562690	987139200	1012256000	874841540	1273151740	708401220	834752830	1434966400	793842820	1190751620	1460259070	1308873730	798696830	1069736510	1568441090	1444324220	1706020480
IGNNEITVLVNDAEK	PGSC0003DMP400001921,Q2MI94,Q2MII1,Q27S44,P400043561,Q3C1J6,P00834,Q33C28	3	49.1328	543.624	101081000	92980304	34588100	17959400	59168000	64003500	50566300	70261904	33803900	20253400	49922700	28393400	123247000	80805416	55960500	58674300	63292800	147890000	110442000	123936000
LNDQWLTMALMGGFAR	PGSC0003DMP400001921,Q2MI94,Q2MII1,Q27S44,P400043561,Q3C1J6,P00834,Q33C28	2	70.4809	912.451	null	null	null	null	null	null	null	null	null	null	null	null	null	null	null	null	null	null	null	null
LNDQWLTMALMGGFAR	PGSC0003DMP400001921,Q2MI94,Q2MII1,Q27S44,P400043561,Q3C1J6,P00834,Q33C28	3	70.4896	608.637	null	null	null	null	null	null	null	null	null	null	null	null	null	null	null	null	null	null	null	null
LNDQWLTMALMGGFAR 2 Oxidation (M) @0.0000000100100000.0	PGSC0003DMP400001921,Q2MI94,Q2MII1,Q27S44,P400043561,Q3C1J6,P00834,Q33C28	2	60.7015	928.45	293200992	168458000	182412000	169548992	159388992	205056000	162044992	248172000	174038000	163552000	185410000	118934000	198608992	244200816	null	109772000	174558000	243577712	224128000	149628000
LNDQWLTMALMGGFAR 2 Oxidation (M) @0.0000000100100000.0	PGSC0003DMP400001921,Q2MI94,Q2MII1,Q27S44,P400043561,Q3C1J6,P00834,Q33C28	3	59.3804	619.303	10098300	9068230	6193980	7312430	9957800	15292970	5206120	9096740	7729380	4760760	6145510	4144650	15588560	6521600	5071450	3820800	7386000	21109400	13815200	8529150
LNDQWLTMALMGGFAR Oxidation (M) @0.0000000000100000.0	PGSC0003DMP400001921,Q2MI94,Q2MII1,Q27S44,P400043561,Q3C1J6,P00834,Q33C28	2	66.6471	920.449	null	null	null	null	null	null	null	null	null	null	null	null	null	null	null	null	null	null	null	null
GFNDVAGYIFGK	PGSC0003DMP400001974	2	54.5187	644.325	11674600	13003800	7083670	12487300	9460040	13008400	10834600	10399600	7986600	9758090	13287100	10600800	12323800	18918000	11625700	8434940	10018800	15895300	13069900	24756100
YDSVSFSSGSLR	PGSC0003DMP400002008	2	37.467	652.812	38477800	37742200	21074700	20462700	28340100	34670900	27872100	38825100	20398100	24089000	22058900	18048300	37626000	42279700	30756500	23185700	18160300	32747700	29675300	41398000
NFSLDILK	PGSC0003DMP400002008,C7ENW3,Q45KF8,Q93YF8,Q93X18	2	50.1528	475.274	29189100	30509400	22461400	24165100	31687600	23171400	22943600	32144600	16494400	18787200	29191300	20580300	36142400	32889900	30522100	16231900	19351300	32783200	26608800	33260100
EMELVQSFVYETLR Oxidation (M) @0.01000000000000.0	PGSC0003DMP400002008,C7ENW3,Q45KF8,Q93YF8,Q9ARH8,Q9LLA9,Q9XGI8,Q93X18	2	56.6986	880.437	15174800	17970100	18255700	13031800	12340900	7231970	16784900	14727200	9084820	12700800	21198600	14154900	20111300	17924800	10495100	8962630	7678170	15845200	14149200	13791600
LSSHDSVYEIK	PGSC0003DMP400002008,C7ENW3,Q45KF8,Q93YF8,Q9ARH8,Q9LLA9,Q9XGI8,Q93X18	2	28.1268	639.325	15185000	19918900	4147570	3211730	16794900	17094200	8664750	18386500	8601880	13221800	9795060	6103310	15423200	21573400	13891200	11748100	20351000	31949900	10866300	22245600
VCAYLDTSEPK	PGSC0003DMP400002008,C7ENW3,Q45KF8,Q93YF8,Q9ARH8,Q9LLA9,Q9XGI8,Q93X18	2	30.7206	641.805	66140408	67043800	26259200	28096700	41904800	41235300	38357900	59362100	31056900	38873700	42137600	28028300	62707500	42464800	59171200	36182200	43104100	58387600	44785800	68442496
TIPGSYGLPLLGPIADR	PGSC0003DMP400002008,C7ENW3,Q93X18	2	58.0989	870.492	59225400	52130800	62832800	42331400	59189600	33786400	50562000	42236500	33416200	38442800	81147000	39272600	72039800	58608200	34110400	25917200	24576300	45291400	43995300	41191800
VGVNPENLSFESVKEMELVQSFVYETLR Oxidation (M) @0.0000000000000001000000000000.0	PGSC0003DMP400002008,C7ENW3,Q93X18,Q9ARH8,Q9LLA9,Q9XGI8	3	67.6745	1087.22	19628900	9809180	9722260	13587100	13289100	null	4905880	6836290	5190800	7978780	null	2571170	null	22627500	null	null	7731140	27456700	21124800	null
VFDEPEKFVLER	PGSC0003DMP400002008,C7ENW3,Q9ARH8,Q9LLA9,Q9XGI8	3	43.7709	503.267	57973600	44904800	19051800	29459100	32000100	60477000	23692500	34967900	26300700	27526000	26454800	25452400	38559900	53521200	79924000	32409200	73432496	104868000	63484400	115853000
IKDTPQDCEVK	PGSC0003DMP400002042,Q38JB4	2	18.8347	666.827	3972200	3740130	736278	1247520	3729570	3593300	2571950	5147590	2506490	2008250	2028580	1265290	3394170	3703540	3775410	1941030	2459050	4110330	3176090	5008110
EAEIVTQSGR	PGSC0003DMP400002084	2	21.3668	545.281	5211140	2980150	3809240	964623	3904760	3708900	2010870	2367280	980555	2720940	1493060	663517	4025760	2572200	4846890	3925780	3780260	3721830	2168070	4259410
AIASISAGNDESIGTMIADAIDK	PGSC0003DMP400002124	2	65.4694	1132.06	null	null	null	null	null	null	null	null	null	null	null	null	null	null	null	null	null	null	null	null
AIELPDAMENAGAALIR	PGSC0003DMP400002124	2	59.3028	877.959	null	null	null	null	null	null	null	null	null	null	null	null	null	null	null	null	null	null	null	null
AIELPDAMENAGAALIR Oxidation (M) @0.00000001000000000.0	PGSC0003DMP400002124	2	46.6326	885.961	33257000	38408400	118169000	13676500	53278368	54419200	30541600	22321600	5686340	56963800	25852100	10860500	57949200	29817600	34524000	31631700	57935700	38674500	30382100	25492800
APLLIIAEDITGEALATLVVNK	PGSC0003DMP400002124	2	72.5307	1132.66	null	null	null	null	null	null	null	null	null	null	null	null	null	null	null	null	null	null	null	null
APLLIIAEDITGEALATLVVNK	PGSC0003DMP400002124	3	72.5241	755.443	null	null	null	null	null	null	null	null	null	null	null	null	null	null	null	null	null	null	null	null
DSTTIIADAASKDEIQSR	PGSC0003DMP400002124	3	37.9433	640.991	38795600	50271800	107236000	11200100	61118200	44735900	26624700	12372900	4833370	54378600	20903400	8358550	58719300	23771200	21592600	39637200	64146100	57863800	32355200	38467900
GYISPQFVTNSEK	PGSC0003DMP400002124	2	38.9107	735.37	52082800	50639700	137092992	15728000	55356100	39311700	34983600	23350000	7407720	66980000	38146400	11361500	73953904	32767500	39798900	52175800	69366400	61365600	49094000	46524100
LADAVGLTLGPR	PGSC0003DMP400002124	2	42.4829	591.848	38852600	42516600	83290896	9750650	47710800	39330100	36852400	20197600	6160620	61312800	22069500	7675380	47945500	17474200	16202400	29006700	51791100	44215200	37251600	35380700
LGADIIQK	PGSC0003DMP400002124	2	30.2344	429.26	60931600	74611296	78960800	13111100	99242200	73164896	41546000	30193300	8546990	91029200	26497200	8182950	82698704	32032100	37042600	78333296	87521400	73456000	52063300	65495400
LGLLSVTSGANPVSLK	PGSC0003DMP400002124	2	50.3491	778.46	29878800	32929700	89744400	12684500	66246300	30720900	25778900	18462700	4481600	44553600	29844600	8497120	44233100	22022500	21186600	21441100	47128900	41837800	30058200	27227400
LGLLSVTSGANPVSLKR	PGSC0003DMP400002124	3	46.2498	571.343	51280600	62931800	124074000	16701100	54497000	85580200	38770200	38287800	8529400	91149000	32819400	13204700	61324100	28010200	52576000	50462400	128789000	106973000	74569904	74823200
NATFAAIEEGIVPGGGAAFVHLSTYVPAIK	PGSC0003DMP400002124	3	64.2814	1000.87	null	4454130	4751420	null	5457010	null	null	null	null	4035930	null	null	null	null	null	null	14621300	13331800	10400300	null
NVVLDEYGTPK	PGSC0003DMP400002124	2	34.6443	617.822	61092500	75558496	89349104	17854800	53780900	82797296	39210000	22260200	8217710	86949696	31189600	9215000	58984700	35060800	40898900	64239000	87798000	48934200	50984100	60245000
TNDSAGDGTTTASVLAR	PGSC0003DMP400002124	2	29.2234	818.896	33281900	38748088	62585500	9173320	74939600	45861088	25022020	18968000	5335480	49259600	21364200	6952370	34819900	22927100	25624400	41105200	51198272	50948432	22686870	40483648
TVLGLIEELEK	PGSC0003DMP400002124	2	61.6338	622.364	22585400	18336700	68490096	9117290	46510400	18150800	18601400	14161400	4195260	35997400	19816300	7799280	36258900	14620100	null	19049200	32085800	26448000	20394200	15032300
TVLGLIEELEKK	PGSC0003DMP400002124	2	57.1202	686.412	9680520	6805760	39462600	3765670	20863300	10917900	8722430	3536650	1701560	24787900	13560300	3245130	18073400	7443740	3206620	8333470	13269200	12481600	9714790	6893120
TVLGLIEELEKK	PGSC0003DMP400002124	3	57.1221	457.944	12896800	9826380	33932700	1776860	24855700	14961000	6497520	4117990	2196020	18343500	9780870	3390480	21536100	7330800	6227540	9402010	21865800	21021400	12371100	8037220
ALVAPASLIAQNAGVEGEVVVEK	PGSC0003DMP400002124,P400021228	2	52.8074	1132.63	12154370	19034140	38304912	4100650	42092500	15940710	11279700	7025540	1103420	30968790	9939870	3339450	25433660	11114830	7782330	14216340	36592232	22067730	18499080	18150960
VGAATEAELEDR	PGSC0003DMP400002124,P400021228	2	28.2312	630.809	49147400	81885000	95223504	13926500	120097000	83619904	41943300	29508400	9216680	92176304	29999000	10293800	86883504	36321700	29219800	51867700	96315000	79945904	27962700	41862100
LSGGVAVIK	PGSC0003DMP400002124,P400021228,Q8L5U4,Q56WB8,P21238	2	15.475	422.269	null	null	null	139404	335652	197772	null	323743	null	197968	140744	null	null	null	null	null	null	238232	null	242817
VVNDGVTIAR	PGSC0003DMP400002124,Q8L5U4,P21238,P400021228	2	27.3064	522.297	60652700	92575696	81055000	13276400	127383000	91425104	45370000	31253600	9663170	91454096	19408200	8488790	90739696	40605800	32630000	51853700	73710304	94340304	44485200	47001700
ELFETDSVYDSEK	PGSC0003DMP400002124,Q8L5U4,P21238,Q56WB8	2	40.3269	781.352	8848700	27830800	81568704	8872420	40314000	19956708	18096200	10980300	3482330	45140900	19327800	5808320	37991600	12412700	20249300	30987500	44277200	30688000	23827400	18866100
LFVTEFFLR	PGSC0003DMP400002125,A4K3G3,Q8H1X6,Q9LLB0,Q8RW06,A4K3F9,A4K3G1,A4K3G0	2	61.8684	586.332	4354810	2787380	4239830	3474360	4991500	2403550	2829570	3023840	3044380	6165380	6460150	2106110	5980410	6531120	5590220	4892020	7221850	9777910	6947640	5769390
AQQTPITPK	PGSC0003DMP400002176	2	19.9988	492.28	3446210	3899800	2029130	2361810	3114730	2761840	877483	3244810	826355	2562900	4375830	1225080	1746250	2964950	5659430	7092140	5395460	6695020	3628460	8604000
DAGEVQEVR	PGSC0003DMP400002176,Q8LNZ4	2	20.2662	501.746	3018080	3523230	2480480	2215180	3027510	null	833866	2866990	595557	2359040	4157400	1196250	1864610	2491650	4141260	4564090	3722970	5356030	3002890	6709300
GFDKNEAEDQIR	PGSC0003DMP400002176,Q8LNZ4	3	26.9581	474.561	6159980	7602700	4045040	6856870	6445910	4362640	1721280	null	1333390	4943200	7841640	3017430	3055960	5068690	7864420	9605850	10913200	14732700	8784160	13710700
FVEVDEEQSR	PGSC0003DMP400002234	2	27.1413	619.29	34981400	42384000	28906800	11024200	50921000	33554300	32650100	30837900	8526470	32690000	12693600	11518600	38409200	24143600	17100500	21455100	25981400	45083500	18793400	27011400
SSAYLPLR	PGSC0003DMP400002234	2	35.2811	453.757	23433200	34809600	19132900	7167610	16753500	32270500	27956300	22227200	9007760	27462000	14666000	8197930	32230400	21994400	24652900	26125300	29458800	23038300	25943100	40055400
GGVVALVEGLR	PGSC0003DMP400002234,PGSC0003DMP400008156	2	50.1497	535.324	27441900	33004400	51080600	18973900	56340300	28516400	33287100	35082300	14046200	32699600	28256900	20113600	46075600	32101400	29839500	22902800	37223000	45630500	33272500	45047400
STAEELLEK	PGSC0003DMP400002234,PGSC0003DMP400008156	2	32.1534	510.268	25933300	26292300	14313400	5686500	22911500	15315300	21197100	20864400	6680430	19324500	11860600	6977720	25137800	15859900	15113800	20078900	19166900	20929900	16271000	20197700
AEEMAQTFR Oxidation (M) @0.000100000.0	PGSC0003DMP400002234,PGSC0003DMP400008156,Q93VC7	2	21.0656	549.748	15009400	14954500	15665700	5149310	22911300	16119900	15820100	17008700	6522850	14325200	9060250	5247100	17629100	12012000	12149900	11295600	11997400	17260100	11954200	19125400
VSDIATVLQPGDTLK	PGSC0003DMP400002234,Q93VC7,C0Z2U7	2	45.482	778.934	19914100	20499500	37202900	7230430	18621000	28085100	23602400	26840200	8171560	25569800	17122300	9723450	18236400	12867300	17607100	10622200	26954000	32821100	22617500	25199100
HVIGENDEFIGKK	PGSC0003DMP400002888,PGSC0003DMP400002889,PGSC0003DMP400007881,P400020397,P400020398	3	27.7027	495.929	5928080	8512910	null	1796560	14975500	13892400	9180370	null	null	8866910	2526100	1801170	null	9861200	5003940	6372750	14128100	13381900	6233060	null
TFDVCFQQLK	PGSC0003DMP400002889	2	45.8966	643.319	5048440	7938140	14958000	2021880	8110390	14849200	10987600	11009900	2071370	12106100	5866470	3468140	14813000	5460280	6457350	2453410	11699600	15534100	8441860	11741300
EGAGGQTIFTK	PGSC0003DMP400003131	2	29.0314	554.784	41653700	26335900	28424200	12536460	47307300	40908500	25610510	42799400	16744750	32872800	23923300	7280350	38394100	33103500	32569900	33266200	33170200	40195500	21257310	39335520
EGQPLGIAVTLR	PGSC0003DMP400003131	2	44.5577	627.367	28376700	17802300	34762200	8163060	14395600	20867100	21858600	33571600	9264700	24403400	16249700	9755710	23886600	12948500	24503400	13031900	23020500	30119500	21576000	26473100
GNVMYSFLDR Oxidation (M) @0.0001000000.0	PGSC0003DMP400003131	2	40.5971	609.287	14660100	15496800	21441400	7770760	16969000	14361000	18491400	21785000	7096310	15157800	13351100	6933930	17540000	11230500	16631600	17019800	17521800	21456300	13594600	14095500
IVVNCGIGDAAQNSK	PGSC0003DMP400003131	2	30.3605	773.392	19748900	19074200	15088000	6324800	21808500	17841320	18410196	23312800	10570910	20262360	14552500	9267200	22600500	13240580	23419980	16241800	24411100	32893800	19469300	30484800
LINLGLPR	PGSC0003DMP400003131	2	43.9574	448.292	45800100	35318400	57993600	11084400	29448200	49939800	34265800	38909600	17204400	34285000	23079900	16275800	34442200	23398000	42408100	23095100	48217400	67567104	37694400	65645200
LLALMGMPFR 2 Oxidation (M) @0.0000101000.0	PGSC0003DMP400003131,O04603	2	43.9009	590.817	20156300	15135400	28792800	4896950	15841700	22178700	15256400	16483300	7367930	16751900	10010700	5576570	18641000	8663480	14756100	14550760	19137100	25165200	12718100	18564500
ADPVEEDKR	PGSC0003DMP400003608,PGSC0003DMP400003609,P400030731,P400030732	2	20.0896	529.76	154197696	126461104	59643640	78725984	145251008	126716400	123186784	187692512	94627728	82609112	134109904	67996808	121611696	131747200	119460896	72836080	69081072	146760704	139165600	180999200
AAASIAKEPEEK	PGSC0003DMP400003838	2	18.3545	622.33	29821400	26583900	10294200	17892200	21929200	21086300	17590700	43954900	22911800	18578800	25609500	21498000	18941600	37694200	30232400	24263700	16592200	28355700	27562100	48294900
AAASIAKEPEEK	PGSC0003DMP400003838	3	18.2701	415.223	66893200	84151296	14966200	28337700	41919800	56825000	38173800	80435600	39525500	27592800	35999100	31574500	53152200	81645600	99793104	60378900	61331800	98790496	67198000	111690000
ANEESDAQVATVR	PGSC0003DMP400003838	2	23.8558	695.336	31306600	24908200	19501900	22027700	44491500	34360900	21035900	30606100	14472900	31657400	35099300	15804100	22168900	21146000	19988300	25706100	27775400	34486900	56700900	50596500
AYAEALEK	PGSC0003DMP400003838	2	24.9404	447.733	74829904	73636400	21502200	33158200	41909400	51588200	40751400	80055104	44751000	40233100	48793200	31552900	48598100	75969504	79655504	58722100	46603200	77937296	74280896	87600800
KAYAEALEK	PGSC0003DMP400003838	2	21.708	511.78	26718600	25655000	8604710	11511200	14255900	16516100	13185500	29546000	17308600	13763100	17752800	14150300	16545800	25334300	25162000	15042300	14767700	27241300	23048900	38159600
TVDELFSVIPEDGR	PGSC0003DMP400003838	2	52.7811	788.9	71777200	99341696	47046400	82253200	70558600	56483700	60806600	110511000	72862896	63847900	121788000	106112000	76798704	111501000	85178800	52312800	63757500	118726000	113900000	139096992
TVDELFSVIPEDGRR	PGSC0003DMP400003838	2	48.2364	866.951	23191400	20955900	15455300	14920100	15369900	13318300	15769000	23980700	17491100	18628000	28724800	25344800	19995200	36912200	31955700	15016400	15932900	27816800	26535200	27276500
TVDELFSVIPEDGRR	PGSC0003DMP400003838	3	48.3784	578.303	81958600	97269712	51467200	64965900	53955300	58347520	55930580	96469056	65500240	49875100	93267680	96110496	74347744	132833208	124459328	57400300	69680920	147044704	119082744	133704688
VVEVFADPSAPSK	PGSC0003DMP400003838	2	36.5414	673.356	244346000	243918000	59620200	98056200	77716800	127545000	117067000	200231008	107672000	102659000	214852000	119573000	137128992	215444000	226714000	137628000	123186000	208040000	185572992	217100000
AGVSDLGAAQELAR	PGSC0003DMP400003838,PGSC0003DMP400003839	2	38.5472	679.36	290697984	204926000	143546000	147740992	106060000	122801000	151156000	313713984	170119008	170152992	227650000	180268000	193936992	309609984	308279008	181868000	192572992	327960992	285107008	392940000
AGVSDLGAAQELAR	PGSC0003DMP400003838,PGSC0003DMP400003839	3	41.5442	453.24	10077000	8560090	4489720	2785300	5273610	6917440	6571390	10158700	8772980	9812160	12869900	6389060	8956540	5944580	8661680	7414000	12628300	21475700	18046900	20442400
AKDPGTVFVAGATGQAGIR	PGSC0003DMP400003838,PGSC0003DMP400003839	3	37.8877	605.998	149687008	145903008	74648704	80973400	63446200	64923200	78726096	110318000	83000200	78983696	110425000	106587000	102584000	138780000	121658000	104635000	106093000	190912992	148226000	222188992
IAQLLLR	PGSC0003DMP400003838,PGSC0003DMP400003839	2	38.5133	413.781	237351008	237441904	126776000	102309440	67205600	93864200	126526240	227032400	138499008	138691056	175404704	121752000	162335008	236511008	235217184	150755008	174826928	316568800	255015792	344477088
IVETDLSYTLIK	PGSC0003DMP400003838,PGSC0003DMP400003839	2	46.4506	697.896	235796496	276277120	167414000	153625264	100022000	196214000	157464992	307111008	178660992	155744992	236411008	260600000	189538976	355607616	347805472	150720000	215428992	313063360	298771008	286418400
IVVSAEGSAGADAYK	PGSC0003DMP400003838,PGSC0003DMP400003839	2	30.5962	719.367	72863400	51569700	21224200	29529600	21284200	30481800	27679100	73350304	29052900	30752500	40107800	41384936	38974400	41368800	84551504	50469900	26641000	64902600	33760300	82597400
LNAVASTFQDAESIAK	PGSC0003DMP400003838,PGSC0003DMP400003839	2	48.9293	832.932	201862000	229774000	120633000	163190000	130602000	106564000	129362000	253970000	127867000	124748000	214068000	208963008	152140992	258700992	234147008	105180000	157026000	261668000	222896000	306353984
LTEDFSPESSYK	PGSC0003DMP400003838,PGSC0003DMP400003839	2	35.0604	701.825	107621000	139664992	47474800	71039800	39354100	81100400	69027400	111894000	89436304	77605504	115944000	96174800	80471400	155536992	167446000	90932800	72772600	81691600	107324000	165362000
LVVDVFSNTAVAENK	PGSC0003DMP400003838,PGSC0003DMP400003839	2	46.3832	803.432	156893424	161547008	120996000	94178000	58319400	115604000	106092000	177054000	112737000	111129000	142332992	161028992	132969000	168338000	206370736	94533504	110918000	197135312	191783008	202864992
SQPLTIAEFLQK	PGSC0003DMP400003838,PGSC0003DMP400003839	2	53.9525	687.889	164700992	211548000	91525200	169760992	95406600	127588000	134280656	202376992	161475840	161607008	208844736	254052000	112436000	256896000	205278000	130182000	166214000	291824992	256944000	277206048
AADNIAANLYSVK	PGSC0003DMP400004144	2	40.9307	675.36	100106000	111164000	109061000	60621800	99167800	135144992	91963200	110044000	77503600	97485000	85830600	35714400	120465000	52771400	108923000	102871000	111131000	171575008	138075008	142718000
ATGEQSAEMVTDEGAIYITSNK Oxidation (M) @0.0000000010000000000000.0	PGSC0003DMP400004144	2	43.2405	1166.04	71834400	42092600	42984900	29032100	38915200	54814900	null	53928200	27295700	32794100	38636700	12121300	46068400	19155600	26704800	24394000	24653400	41717600	27270100	33442100
ATGEQSAEMVTDEGAIYITSNK Oxidation (M) @0.0000000010000000000000.0	PGSC0003DMP400004144	3	43.1863	777.697	37271400	21798000	21057100	14718700	20423000	30945300	15224700	29808400	12021900	15292700	12329800	7307700	33146000	9941360	15021000	15616600	14660300	27918500	15984400	19942700
DGGTTWVPR	PGSC0003DMP400004144	2	32.5898	494.746	68297000	67239824	23161800	32635570	40434208	69851200	38751200	71410800	45672840	57272608	38076832	18607120	62507632	47188040	61744600	59166900	52806600	89703800	66069300	63981100
GNFYLTWEPGQAYWQPHNR	PGSC0003DMP400004144	3	52.7174	788.707	3745710	3122120	5280900	3564300	7836390	6055600	4701120	7919000	8019350	10953500	9777740	3822720	7834580	5421830	6518800	4286590	9599570	15741900	15290100	10700200
GTGLTEDFEEVSVQSR	PGSC0003DMP400004144	2	44.0829	877.42	117724000	82816896	97330496	52977000	88853296	110148000	64251300	96284304	60115900	78857904	86729000	31675200	80947104	42482800	88030896	62630400	79710200	101549440	99147800	100800000
IPLSSQLPGDMVYIK	PGSC0003DMP400004144	2	51.0432	830.96	19099000	14237000	10333700	21666600	26957700	25048000	16408300	23726900	32286800	21376200	29260900	14768700	33927200	33152400	53002400	31308300	13135700	70185800	48508900	51410900
IPLSSQLPGDMVYIK Oxidation (M) @0.000000000010000.0	PGSC0003DMP400004144	2	45.4498	838.954	203105392	148464992	156844992	98238096	100707000	228336000	120360000	235811008	89428496	120241000	137367008	49811700	120401520	78218896	159312992	100576000	121604000	191944992	151151008	139844000
SIASAEEEDFNYR	PGSC0003DMP400004144	2	37.7217	765.842	146305056	83994736	98894800	60866144	86315664	106918712	73859720	133155288	61957440	80122032	103682216	32604300	104823024	74707184	66837728	94665800	77342880	112679000	89396016	101708672
SQDEAWAAGGSGILLK	PGSC0003DMP400004144	2	46.1531	801.914	44364900	31460100	39692100	21512500	22861000	39985600	29832600	46802600	30673600	35289900	45411400	17302200	38213800	19486000	42152600	23505000	41578900	54041500	49681400	51477100
TVSSGISGASYYTGTFSTVNR	PGSC0003DMP400004144	2	43.8486	1078.02	52803100	30590300	39833500	23944600	32983200	43790900	28237900	33895400	26861060	31672700	38951200	12622200	34839300	16261200	40292300	20867700	25627600	39335600	29047400	38411300
AAIQETVSATLNR	PGSC0003DMP400004144,O82660	2	38.4904	687.375	158992992	97473800	96549904	56607500	74482000	91231904	89906896	158855008	73022600	97566200	100907000	31571400	119217000	77926400	104984000	106041000	99715904	148330000	124542000	130544000
ADGGLWLLVR	PGSC0003DMP400004144,O82660	2	55.5454	550.319	29656000	15577600	20078500	14692400	24790000	21262200	15913300	26804200	22142100	24492900	32818600	12801100	28069100	14343200	20213800	16447200	28324300	42830200	37105600	34355800
GFGILDVGYR	PGSC0003DMP400004144,O82660	2	49.9341	548.796	111171000	86354704	82734304	69944896	110693000	105334000	74383904	120417000	71232000	81946096	101136000	44431900	112334000	79281296	103596000	70567800	91031200	138199008	124115000	132958000
DLVNVLEEAIK	PGSC0003DMP400004499	2	62.6406	621.854	13225900	13376200	58883700	10427800	33925400	15783400	11182800	8319240	2486390	38724200	17376400	3997230	28109900	5105300	9994810	11028100	16863600	10069800	13803200	6593110
DSTTIVGDGSTQDAVSK	PGSC0003DMP400004499	2	28.8694	840.903	3532840	4451590	10163700	907175	9583484	5902240	1444890	null	400561	8627740	2691320	null	6199780	2034710	1718030	2236220	3883100	3768570	1612030	null
DSTTIVGDGSTQDAVSKR	PGSC0003DMP400004499	3	27.1176	612.971	8146460	8940190	12461500	2109650	18436780	12417100	2763340	2770590	1067290	12240700	2728000	1208810	11500800	5192980	3380970	4801700	9797550	10412800	4208300	4609600
EEVGLYLDQAGSEVLGNAAK	PGSC0003DMP400004499	2	53.5107	1032.02	3068240	5330710	22932900	1169730	8395120	3236060	3332380	null	null	9893860	3802560	null	9253420	2422220	1167720	1840890	null	3531580	1500990	1304140
MVAEYENCK Oxidation (M) @0.100000000.0	PGSC0003DMP400004499	2	19.8705	580.242	1044280	1474480	3302130	320458	3340210	2011670	811012	746934	null	1615630	839779	null	2416690	574517	null	null	1236870	1452930	655205	1126650
NAGVNGSVVIEK	PGSC0003DMP400004499	2	27.4979	593.827	9804440	11284000	13898000	1965800	18236900	14796500	3805570	3487020	905256	17101700	5326600	null	13365800	6237680	5217640	7086890	15993900	13652200	3681640	4727120
MMDAELDNVNK 2 Oxidation (M) @0.11000000000.0	PGSC0003DMP400004574	2	23.5961	656.283	12012100	9497980	5578580	6612390	12037700	10750200	6121340	10490100	4397290	6629920	5117200	2928330	6859280	6442610	8420920	7414320	5872890	9662610	7083840	9792510
VTQESLENSR	PGSC0003DMP400004574	2	22.1672	581.79	13733300	14513300	6766880	7879480	13746100	13166000	7478420	12727400	5606540	8476580	7325770	3597100	8106540	7567390	9849660	9108750	9273080	10133800	10772000	14039900
ATESLDEINR	PGSC0003DMP400004574,P93203	2	28.349	574.285	10667100	10921000	6874850	4071690	11288000	9195490	5969540	9568880	5609280	5936740	4886510	3077190	6308210	5147070	4318270	4077040	null	9194780	3633340	5760680
NVLALAEELELATSR	PGSC0003DMP400004574,P93203	2	63.5247	814.95	19430500	14758500	16625800	11285600	14962200	9786130	8875220	19011100	9701520	13837700	12540600	8094810	11095100	10992400	null	7664710	11312500	19604300	14797000	9031620
AVGVLYQVVDDILDAK	PGSC0003DMP400004817	2	72.0219	859.476	null	null	1679230	null	null	null	542160	null	null	1140240	null	null	null	null	null	null	null	null	1036850	null
ALAENEGEGLAK	PGSC0003DMP400004984,F4JLP5,Q9M5K4,P400047162,P400047164	2	26.1075	601.308	9157360	11247500	8659700	null	21335100	7685570	10000900	7928070	2515950	10683400	null	1536540	11865500	6062240	5264180	8442900	13463800	10121400	null	4971210
IYVPLALQLLVTCGK	PGSC0003DMP400005194	2	67.2964	844.498	9033540	10575100	16484200	8652930	13354900	4175290	7350250	11890500	11583600	13697400	9133830	9470990	3917030	14176600	13931900	5787060	16003300	24126300	20749900	12851200
IYVPLALQLLVTCGK	PGSC0003DMP400005194	3	67.5293	563.334	null	1826240	4091700	3202770	4493290	null	1077120	2540180	1856620	3503320	2095160	2671150	null	2383280	null	null	3018890	5604790	3952760	2550530
GADGSEYITLR	PGSC0003DMP400005278,PGSC0003DMP400005279	2	36.3856	591.296	23139700	25475380	32518430	6685880	35121040	28273100	28646270	25559700	6589260	30515020	18279370	6642750	34516992	20489500	17482190	29518960	29071790	24662100	23599780	23200140
TTGGLFLSQAAK	PGSC0003DMP400005278,PGSC0003DMP400005279	2	37.5721	597.329	62788900	52760700	63385400	13952000	53531500	52292400	43927700	40890000	9066410	5446090	36640832	15223530	60042600	40148500	25856800	30408900	78108400	96258600	61721000	87585400
EDDIVGILETDDIKDLQPLNDR	PGSC0003DMP400005279	3	58.5648	842.761	5176810	3666540	13556300	1566240	8982020	3527300	7630570	3132520	null	6762820	4627820	1467940	8009990	3935890	1151640	2374980	4039840	4121580	3844740	2824990
NGTQVLYSK	PGSC0003DMP400005279	2	23.8101	505.27	16867100	14103300	13990600	5554260	28075800	19021100	16323400	15353400	4133460	16480100	6351240	3027710	18812500	11685500	10894600	17689300	16311500	16070400	13145900	17435800
YAGTELEFDGSK	PGSC0003DMP400005279	2	35.9099	658.807	20167300	18382100	20132500	4630250	20249100	21413700	17070200	11541400	4952290	21695700	15077800	4449290	20290300	13816100	12559400	20027400	21211600	14992100	12541000	19067400
ALSVSPGNTVLYSK	PGSC0003DMP400005279,PGSC0003DMP400005278	2	38.996	718.396	44242300	31113900	61638000	9620920	43274300	28443400	38787300	30488400	9806970	37700500	23220900	10668100	50150900	30400400	29515000	37915500	50429100	53451900	37747900	40977200
ASLVNDVDDVEK	PGSC0003DMP400005581	2	36.6057	652.325	5049820	4206760	9470500	1405760	6983070	4831010	6138480	5347900	null	5734970	3627610	null	null	4392060	3717720	5119540	8996320	8128450	5963400	7213250
ALSETGGDLEK	PGSC0003DMP400005664	2	24.9329	560.281	16353200	20115100	14214100	3338180	33425600	26208000	15498200	11333800	3853450	16945400	5700020	3171110	20824000	12300900	15344600	15944200	19120400	21586500	13943300	16620200
LVEANTETGR	PGSC0003DMP400005664	2	19.2071	545.281	16495000	15844700	15798000	4188940	26173500	19584900	12061000	10329900	3497330	14049300	7523930	3112860	19956100	12455000	15502000	14768000	17504900	23466200	12468800	21000600
QLREETGAGMMDCK 2 Oxidation (M) @0.00000000011000.0	PGSC0003DMP400005664,Q0WWF9,Q0WVD2,F4JMU5,Q5QEA9,Q9SZD6	3	15.7415	553.238	786323	1522690	1165740	377610	1390200	478514	695166	696397	116593	917522	233136	114551	456250	355748	419616	null	501362	482649	444689	null
ATESANAAGGGSAIQK	PGSC0003DMP400005712	2	18.5488	716.855	1756117	1328860	1056780	975800	1695210	1228120	717917	1807540	562439	1194260	1820780	526418	1078610	881573	1415470	1799010	1483960	2227760	1513740	2080490
ASTDDSDCNAEECAPEK	PGSC0003DMP400005901	2	19.6999	949.855	12014000	9725030	6443370	6194510	14454479	15224153	8064680	11515600	5792720	11555498	12798120	4270198	9924350	8245740	8196110	2257870	6759230	10484800	8777310	11676700
ASTDDSDCNAEECAPEKEVGK	PGSC0003DMP400005901	3	23.8912	771.317	25428000	18360900	8708980	14611800	23727700	30158910	11633700	19616800	10540100	17627500	18944100	7594140	20056200	19513000	22208200	7679370	17086000	23980300	14405100	25652600
NSPPLVQTVEYSGPSLSYYINK	PGSC0003DMP400005901	2	54.698	1228.63	36485100	37807900	20381800	33347600	26305400	26814600	28245000	26034100	22091100	29103100	39894900	22416300	29588700	39604800	30904100	20036400	31814100	46932200	42509900	58862900
NSPPLVQTVEYSGPSLSYYINK	PGSC0003DMP400005901	3	54.7139	819.42	51694100	54942000	36078400	48028600	42106100	48947900	37876400	30470900	29502900	37689300	54294900	30075400	53225100	56621200	41017500	38637800	41775900	75567800	61710100	68639296
VSMEWVAMDNTK 2 Oxidation (M) @0.001000010000.0	PGSC0003DMP400005901,Q672Q7	2	28.2739	721.822	27743000	21485500	11232400	11284930	25530900	23270100	12654830	25547800	16096630	22203600	21662300	8871040	21669840	25803400	28489800	18915870	21399100	30612000	16762220	24384200
STEGLGNLPK	PGSC0003DMP400006263	2	31.0103	508.276	12825200	11606100	9330930	2133940	9525620	7978000	11658900	6224360	2081500	8414740	4320720	2801840	12682700	3996180	6121480	10281600	14251500	11875000	8181530	10351700
GLVPLAGSNNESWCQGLDGLASR	PGSC0003DMP400006333,PGSC0003DMP400006334	2	54.5834	1201.09	7232400	8794280	16383000	2977980	11396500	10810700	13679700	8248040	2059810	16118100	8115810	6291490	11242900	13320200	6309000	3281050	18432600	17447500	11430700	17952500
GLVPLAGSNNESWCQGLDGLASR	PGSC0003DMP400006333,PGSC0003DMP400006334	3	54.9758	801.06	3647950	3936080	3948170	null	6268710	3220480	5015370	null	null	4888300	2097700	null	8943520	7194000	null	null	9108720	12048300	null	9608400
LASIGMENTEANR	PGSC0003DMP400006333,PGSC0003DMP400006334	2	36.2924	703.341	null	null	null	null	null	null	null	null	null	null	null	null	null	null	null	null	null	null	null	null
LASIGMENTEANR Oxidation (M) @0.0000010000000.0	PGSC0003DMP400006333,PGSC0003DMP400006334	2	25.1721	711.34	67217504	72566496	55759700	19006400	74200400	75801696	68999400	51838600	14990500	46776800	26053300	17312000	93518800	58378400	51627200	65280700	53994000	65442400	37127600	47074600
TWSGRPENVK	PGSC0003DMP400006333,PGSC0003DMP400006334	2	21.1291	587.302	8858982	8825490	4151170	1653922	14902166	13471339	10403817	7730960	2385062	8687600	3261048	1674930	12168556	8516667	7339230	8463850	10928800	12667400	7642515	11816920
YAAISQDNGLVPIVEPEILLDGEHNIDR	PGSC0003DMP400006333,PGSC0003DMP400006334,P400021255,Q9SXX4	3	59.6776	1030.87	49341400	53047400	84849600	27862400	84007696	64225700	74050200	60670800	27878100	93136704	43174100	46090900	68245800	78795296	49753300	50957000	105152000	111009000	73919200	89985696
MVDVLVEQNIVPGIK	PGSC0003DMP400006333,PGSC0003DMP400006334,Q9SJU4,F4IGL5,C0Z2F2,F4IGL7,Q944G9,F4JUJ5	2	56.0565	827.467	null	null	1370880	null	null	null	null	null	null	651740	null	null	null	null	null	null	null	null	null	null
MVDVLVEQNIVPGIK Oxidation (M) @0.100000000000000.0	PGSC0003DMP400006333,PGSC0003DMP400006334,Q9SJU4,F4IGL5,C0Z2F2,F4IGL7,Q944G9,F4JUJ5	2	49.9698	835.467	26250100	28631200	44638500	12840100	58546700	32193000	37489300	28591500	8528140	26314600	16801600	16145800	51674800	33693500	29283900	20482400	31583800	32767700	24873400	34084000
TVVSIPNGPSALAVK	PGSC0003DMP400006333,PGSC0003DMP400006334,Q9SXX4,F2VJ75,Q9SXX5,A1BQW8,Q5DNZ5,B0FPD8,PGSC0003DMP400005640,P93565,PGSC0003DMP400005639,P400021255,F4JUJ5,Q944G9,Q9SJU4,F4IGL5,C0Z2F2,F4IGL7	2	43.4642	726.928	319180992	330540000	489569984	98157904	360924992	438163008	428475008	337367008	85606000	349022016	180590000	135978000	528984000	236979008	312243008	239250000	484848000	509616000	327020992	423102016
DPNATVIMLATGTGIAPFR Oxidation (M) @0.0000000100000000000.0	PGSC0003DMP400006368,A8HIW1,C0Z2A8,Q8W493,Q8W493-2,Q8W493-3,B9DFU4,Q30GS3,Q4KQR7,Q4KQS7,Q4KQT2,Q4KQT4,Q30GR3,Q30GS1,E7CD31,E7CD77,O04977,A8HIT5,A8HIW9,A8HIY1,A8HIY7,A8HIZ6	3	57.5473	654.347	463780000	322988000	296689984	281328000	463838016	417296000	238564000	262592992	165010000	170458000	351279008	167667008	484524000	347140992	262494000	211183008	230440992	297537984	237275008	274448000
DGIVWADYK	PGSC0003DMP400006368,O04977,A8HIW1,A8HIT5,A8HIW9,A8HIY1,A8HIY7,A8HIZ6	2	42.793	533.766	34995200	32987400	23437100	16222900	23041600	25056500	29484700	33471800	14253500	23082900	30851400	13929100	34046800	16570300	16452900	17019000	17056700	23785400	22040600	16803900
DGIVWADYKK	PGSC0003DMP400006368,O04977,A8HIW1,A8HIT5,A8HIW9,A8HIY1,A8HIY7,A8HIZ6	2	36.1066	597.814	449209984	334715008	176874000	178316992	226452000	336039008	242880992	332686016	167790000	244176000	370756000	137352000	251540992	294543008	336718016	314921984	214115008	208924000	248602000	304404992
DPNATVIMLATGTGIAPFR	PGSC0003DMP400006368,O04977,A8HIW1,C0Z2A8,Q8W493,Q8W493-2,Q8W493-3,B9DFU4,Q30GS3,Q4KQR7,Q4KQS7,Q4KQT2,Q4KQT4,Q30GR3,Q30GS1,E7CD31,E7CD77,A8HIT5,A8HIW9,A8HIY1,A8HIY7,A8HIZ6	2	65.2001	973.015	null	null	null	null	null	null	null	null	null	null	null	null	null	null	null	null	null	null	null	null
DPNATVIMLATGTGIAPFR Oxidation (M) @0.0000000100000000000.0	PGSC0003DMP400006368,O04977,A8HIW1,C0Z2A8,Q8W493,Q8W493-2,Q8W493-3,B9DFU4,Q30GS3,Q4KQR7,Q4KQS7,Q4KQT2,Q4KQT4,Q30GR3,Q30GS1,E7CD31,E7CD77,A8HIT5,A8HIW9,A8HIY1,A8HIY7,A8HIZ6	2	57.4925	981.016	677004990	478182016	421583264	389849984	531705984	451435008	332484000	347695008	215536992	275395872	449633984	241587008	512635008	502612000	379870016	291424000	310124992	357860992	345655008	378371008
MAQYAEELWTLLQK Oxidation (M) @0.10000000000000.0	PGSC0003DMP400006368,O04977,A8HIW1,PGSC0003DMP400006369,Q30GS3,Q4KQR7,Q4KQS7,Q4KQT2,Q4KQT4,Q30GR3,Q30GS1,E7CD31,E7CD77,E7CD59,A8HIT5,A8HIW9,A8HIY1	3	61.3853	580.63	57783600	42944100	49774400	44580400	40836500	48446300	43617400	58863400	41395200	42492900	56211400	41905672	78651000	67554600	null	51522000	73336304	96725296	91398400	62690000
LDFAVSR	PGSC0003DMP400006368,O04977,A8HIW1,PGSC0003DMP400006369,Q30GS3,Q4KQR7,Q4KQS7,Q4KQT2,Q4KQT4,Q30GR3,Q30GS1,E7CD31,E7CD77,E7CD59,A8HIT5,A8HIW9,A8HIY1,A8HIY7,A8HIZ6,F4JZ46,B9DI26,Q9FKW6	2	34.046	404.225	1705335170	1358398720	432394400	441026176	646065470	1142854780	779510020	855581120	473723360	735236610	696718270	393691008	1063709500	1015002500	825306370	1123465600	1058408190	1490277630	1210006140	1544076030
FNGTAWLFLGVPTSSSLLYK	PGSC0003DMP400006368,O04977,A8HIW1,Q30GS3,Q4KQR7,Q4KQS7,Q4KQT2,Q4KQT4,Q30GR3,Q30GS1,E7CD31,E7CD77,E7CD59,A8HIT5,A8HIW9,A8HIY1,A8HIY7,A8HIZ6	2	69.105	1101.09	null	null	1473220	null	null	null	null	null	null	1887830	null	null	null	null	null	null	null	null	null	null
FNGTAWLFLGVPTSSSLLYK	PGSC0003DMP400006368,O04977,A8HIW1,Q30GS3,Q4KQR7,Q4KQS7,Q4KQT2,Q4KQT4,Q30GR3,Q30GS1,E7CD31,E7CD77,E7CD59,A8HIT5,A8HIW9,A8HIY1,A8HIY7,A8HIZ6	3	69.9449	734.394	null	null	null	null	null	null	null	null	null	null	null	null	null	null	null	null	null	null	null	null
KAEQWNVEVY	PGSC0003DMP400006368,O04977,C0Z2A8,Q8W493,Q8W493-2,Q8W493-3	2	41.2253	633.318	135256608	123777200	106002200	77113904	105004400	167708096	112647200	146922000	102316000	140302592	159983600	82859960	145842800	127922496	188431200	149751808	183921184	248446592	190657312	287384992
GMEQGIDEIMSALAER	PGSC0003DMP400006368,O04977,PGSC0003DMP400006369	2	68.9422	875.412	null	null	null	null	null	null	null	null	null	null	null	null	null	null	null	null	null	null	null	null
GMEQGIDEIMSALAER	PGSC0003DMP400006368,O04977,PGSC0003DMP400006369	3	68.9409	583.944	null	null	null	null	null	null	null	null	null	null	null	null	null	null	null	null	null	null	null	null
GMEQGIDEIMSALAER 2 Oxidation (M) @0.0100000001000000.0	PGSC0003DMP400006368,O04977,PGSC0003DMP400006369	2	47.6166	891.41	585801020	555265020	525841984	377952000	400998016	681067010	482399008	560822020	274720000	379056992	531779008	320625984	599419010	495281984	558241020	287140992	316216000	483752992	422097984	395808992
GMEQGIDEIMSALAER Oxidation (M) @0.0000000001000000.0	PGSC0003DMP400006368,O04977,PGSC0003DMP400006369	2	55.6058	883.412	null	4464130	4467070	null	null	null	null	1659950	null	8211020	3331630	1825330	null	null	null	null	4724890	5647010	3471010	4449010
GMEQGIDEIMSALAER Oxidation (M) @0.0000000001000000.0	PGSC0003DMP400006368,O04977,PGSC0003DMP400006369	3	59.9676	589.277	null	null	4363940	null	null	null	null	null	null	3011060	1881920	2406650	null	null	null	null	null	null	1441190	2799950
GMEQGIDEIMSALAER Oxidation (M) @0.0100000000000000.0	PGSC0003DMP400006368,O04977,PGSC0003DMP400006369	2	62.4269	883.41	null	null	null	null	null	null	null	null	null	null	null	null	null	null	null	null	null	null	null	null
MAQYAEELWTLLQK	PGSC0003DMP400006368,O04977,PGSC0003DMP400006369,A8HIW1,Q30GS3,Q4KQR7,Q4KQS7,Q4KQT2,Q4KQT4,Q30GR3,Q30GS1,E7CD31,E7CD77,E7CD59,A8HIT5,A8HIW9,A8HIY1	2	64.2899	862.444	3767920	9417130	10326600	1404870	3549100	3281810	1442300	12462600	6173050	14248300	4727600	4746500	898657	6730610	null	null	15281400	15501500	12770200	null
MAQYAEELWTLLQK	PGSC0003DMP400006368,O04977,PGSC0003DMP400006369,A8HIW1,Q30GS3,Q4KQR7,Q4KQS7,Q4KQT2,Q4KQT4,Q30GR3,Q30GS1,E7CD31,E7CD77,E7CD59,A8HIT5,A8HIW9,A8HIY1	3	64.5151	575.298	1705130	2980710	4662120	null	1940890	null	null	3555420	1697800	4190210	993306	1455260	null	1391170	null	null	6884750	7753050	4404670	null
MAQYAEELWTLLQK Oxidation (M) @0.10000000000000.0	PGSC0003DMP400006368,O04977,PGSC0003DMP400006369,A8HIW1,Q30GS3,Q4KQR7,Q4KQS7,Q4KQT2,Q4KQT4,Q30GR3,Q30GS1,E7CD31,E7CD77,E7CD59,A8HIT5,A8HIW9,A8HIY1	2	61.3968	870.442	143372000	108049000	123219000	110743000	101052000	124321000	118505000	157664992	113728000	143231008	182328992	110897000	164394000	152032000	null	115935000	159467008	207956000	229248000	147996992
DNTFIYMCGLK	PGSC0003DMP400006368,O04977,PGSC0003DMP400006369,A8HIW1,Q30GS3,Q4KQR7,Q4KQS7,Q4KQT2,Q4KQT4,Q30GR3,Q30GS1,E7CD31,E7CD77,E7CD59,A8HIT5,A8HIW9,A8HIY1,A8HIY7,A8HIZ6	2	51.7028	681.317	null	null	1742100	null	null	null	null	null	null	3068450	null	null	null	null	null	null	null	null	null	null
DNTFIYMCGLK Oxidation (M) @0.00000010000.0	PGSC0003DMP400006368,O04977,PGSC0003DMP400006369,A8HIW1,Q30GS3,Q4KQR7,Q4KQS7,Q4KQT2,Q4KQT4,Q30GR3,Q30GS1,E7CD31,E7CD77,E7CD59,A8HIT5,A8HIW9,A8HIY1,A8HIY7,A8HIZ6	2	41.0762	689.316	220110000	277880000	244426000	173020992	285132000	394225984	263688000	214336992	175768992	215336992	241320000	131469000	361630016	195364000	324161984	162744992	273254016	361039008	291535008	340335008
KQDEGVIVNK	PGSC0003DMP400006368,O04977,Q30GS3	2	17.4084	565.314	3125870	3416010	1583410	2092100	4243720	4251980	2543250	3986720	1276730	1113160	2557280	1375380	3121430	1342100	2339260	2162100	1515180	3889640	2384560	4592220
QDEGVIVNK	PGSC0003DMP400006368,O04977,Q30GS3	2	22.0705	501.267	65204700	62117800	21308900	24368000	47138000	55193700	39130300	46574400	20419200	27868800	29842000	15322500	45197500	38342500	47007400	40641700	29685800	43610100	39817900	56263000
EGQSIGVIADGVDANGKPHK	PGSC0003DMP400006368,O04977,Q30GS3,Q4KQR7,Q4KQS7,Q4KQT2,Q4KQT4,Q30GR3,Q30GS1	3	30.6861	664.679	115950496	104041904	39948360	49128800	102641296	87986704	78016400	93877200	68890304	126594400	133420000	75926000	111032496	136274400	160182592	138618000	139460704	221788992	170146000	289151488
EGQSIGVIADGVDANGKPHK	PGSC0003DMP400006368,O04977,Q30GS3,Q4KQR7,Q4KQS7,Q4KQT2,Q4KQT4,Q30GR3,Q30GS1	4	30.4755	498.761	198486992	247575200	55714800	72586576	164206096	145931200	122702000	146708000	104254096	168640512	177686496	109730296	183487296	228147104	301689408	236529392	273498688	428301824	303059296	486335424
FRPKEPYVGR	PGSC0003DMP400006368,O04977,Q30GS3,Q4KQR7,Q4KQS7,Q4KQT2,Q4KQT4,Q30GR3,Q30GS1	3	22.7116	416.901	25891800	16464500	3587540	17827200	25817200	37055800	8120320	24896600	12470500	14323000	12579000	10988600	17146900	46573900	55616300	48443600	58986200	67695600	44170000	107729000
GVCSNFLCDLKPGAEVK	PGSC0003DMP400006368,O04977,Q30GS3,Q4KQR7,Q4KQS7,Q4KQT2,Q4KQT4,Q30GR3,Q30GS1	2	45.1692	947.468	89893696	91674000	68905200	33207600	48162800	97883104	91791400	141163008	56233600	85965800	120380000	41726900	82639696	66985300	131769000	25595500	134571008	138338000	143967008	172323008
GVCSNFLCDLKPGAEVK	PGSC0003DMP400006368,O04977,Q30GS3,Q4KQR7,Q4KQS7,Q4KQT2,Q4KQT4,Q30GR3,Q30GS1	3	45.1717	631.981	405615008	496436000	399443008	310424992	343964000	533998016	488956000	622824000	336105984	445833984	646945980	297913984	446443008	363519008	568444990	145215008	699086020	878118980	792489980	867702980
ITGDDAPGETWHMVFSTEGEVPYR	PGSC0003DMP400006368,O04977,Q30GS3,Q4KQR7,Q4KQS7,Q4KQT2,Q4KQT4,Q30GR3,Q30GS1	3	56.6242	898.743	null	null	null	null	null	null	null	null	null	null	null	null	null	null	null	null	null	null	null	null
ITGDDAPGETWHMVFSTEGEVPYR Oxidation (M) @0.000000000000100000000000.0	PGSC0003DMP400006368,O04977,Q30GS3,Q4KQR7,Q4KQS7,Q4KQT2,Q4KQT4,Q30GR3,Q30GS1	3	48.3827	904.079	125043392	144168592	140148304	97534800	135634000	127547296	113935296	134967904	98724600	138516208	154833296	117763104	186393296	203731712	233868400	108209600	177005504	252359600	195482592	174138800
LVYTNDKGEEVK	PGSC0003DMP400006368,O04977,Q30GS3,Q4KQR7,Q4KQS7,Q4KQT2,Q4KQT4,Q30GR3,Q30GS1	2	22.5774	697.863	157792000	129075000	29610300	82803104	126324008	143608352	96576952	120983720	47624164	81833800	48571320	25977356	119704000	112958728	147468000	132173000	119075272	168378400	137582096	205482736
LVYTNDKGEEVK	PGSC0003DMP400006368,O04977,Q30GS3,Q4KQR7,Q4KQS7,Q4KQT2,Q4KQT4,Q30GR3,Q30GS1	3	22.7043	465.578	869377020	838313980	344983008	500363008	746956030	854268930	543857020	759811070	312456000	483012000	457340096	265590000	772303490	696390020	828390980	667312000	679829310	1039325630	759214910	1095525760
LYSIASSALGDFGDSK	PGSC0003DMP400006368,Q30GS3,Q4KQR7,Q4KQS7,Q4KQT2,Q4KQT4,Q30GR3,Q30GS1	2	49.7317	815.906	1053489980	995412990	779228030	597073980	986993980	846864000	776236990	973398980	484348000	685790980	778289980	664728000	959228990	1139680000	1153760000	653366980	928123010	1347289980	1080960000	1373369980
LYSIASSALGDFGDSK	PGSC0003DMP400006368,Q30GS3,Q4KQR7,Q4KQS7,Q4KQT2,Q4KQT4,Q30GR3,Q30GS1	3	49.7315	544.273	38927600	53821100	26299000	8499520	43379800	38684700	34620100	23048900	21380500	8488870	14555800	13894000	64525700	37962100	28569300	28628400	35647100	81696304	58898000	68648400
SQLLLDADQVEK	PGSC0003DMP400006591,PGSC0003DMP400006592	2	38.7069	679.865	null	8217390	13149900	3449300	10453000	9297880	8229140	10124200	5473660	9853820	8880740	3951650	9405880	12224200	11407300	11318600	14512600	19628400	13631400	20949400
YANLLLTR	PGSC0003DMP400006661	2	40.4639	482.287	null	7353100	7387370	4056100	8593990	6960490	8959650	13507100	8691240	7459810	9165810	2531570	8681400	5467290	10831200	10078700	11066700	18229200	16291800	13603900
AKVDLGGSK	PGSC0003DMP400006728	2	30.8708	437.755	100095000	98597800	476148992	19683500	32859400	25006800	30542200	53365600	28308300	57898700	51783400	32853700	22049500	46573200	67378000	63885200	132141000	118583000	45777300	160802000
ENTQPCFPCTGTGAQK	PGSC0003DMP400006745	2	30.1565	898.394	11047900	8052080	3446440	4418870	11763600	12635700	5644980	17974400	7506600	7169600	8954170	4824580	7466840	14308500	13251200	null	10813000	20709400	14817500	24026600
FVFDDEALEVK	PGSC0003DMP400006746	2	48.6675	656.33	40229200	32713800	20749400	23818200	33173200	27526400	22745500	34263500	17119200	22179300	29927900	24393000	42349900	47704800	53982100	25857000	36938300	61632100	47439500	54367100
QLYDAMVER Oxidation (M) @0.000001000.0	PGSC0003DMP400006746	2	28.09	570.771	38968700	25604500	12637870	12005500	30700320	33011030	18483330	30903860	14239600	14426000	21501400	12255150	28708980	32475610	35390700	19789000	25961980	45867648	19170240	31538700
VGEQLEESGENVFVGGK	PGSC0003DMP400006746	2	41.4856	889.438	80058304	50655500	30434200	29111800	34899900	53854400	39823300	53277500	32685800	35725800	58207700	31206400	40649900	46436300	56025500	58698800	52011900	74307904	57722700	102471000
GLGASLQR	PGSC0003DMP400006761,Q940U6,F4JFR2,F4JFR1	2	24.9333	401.232	502504192	538832900	341207904	209780256	568759620	518275200	449001696	385819584	140688192	415666144	230826624	119617712	602693700	392417216	377586304	456387488	401863712	465095200	386025024	581072580
HKEHISAYGEGNER	PGSC0003DMP400007746,B9DGD1,Q56ZK3,Q69B32,Q43127,Q37229,Q0WWL2,F4ID91,Q8LCE1	3	17.3506	542.926	null	3358340	1840950	637584	null	4526730	5138260	4278180	2156420	7320620	2654460	2339430	5042510	2469590	2598800	4158130	6812940	4592610	2226370	8767700
AILNLSLR	PGSC0003DMP400007746,B9DGD1,Q56ZK3,Q69B32,Q43127,Q37229,Q6K0Q3,Q9FPU0	2	44.7522	450.29	126359104	155593568	235236608	48345220	126843000	160900704	211409408	166466832	43968480	161455008	96438128	55460200	150523696	105180784	115566000	95381248	226850304	213494000	161975008	180799536
HKEHISAYGEGNER	PGSC0003DMP400007746,Q69B32,B9DGD1,Q56ZK3,Q43127,Q37229,Q0WWL2,F4ID91,Q8LCE1	4	16.7826	407.446	2988240	7739420	4646790	1371680	12104400	9890880	9559420	8066190	3995330	10559773	4776970	null	15830100	6586056	5644020	7610130	15723370	7644960	7028680	16546600
GGNNILVICDTYTPAGEPIPTNK	PGSC0003DMP400007746,Q9FPU0	2	48.6671	1222.62	7975410	11217800	27909200	5350360	25774200	13073200	18879700	11848400	3461570	15705100	6222340	7909870	18792300	13038900	8717690	3643950	11663700	16376200	8067870	11078500
GGNNILVICDTYTPAGEPIPTNKR	PGSC0003DMP400007746,Q9FPU0	3	45.386	867.447	49849900	66043000	98345104	27743600	79265904	110804000	87418896	82354496	26623400	100310000	56354800	41545300	71962000	55949700	72261800	38647200	137208992	147224000	102786000	132351000
MEQLLNLDVTPYTDK	PGSC0003DMP400007746,Q9FPU0	2	55.9216	890.446	null	null	null	null	null	null	null	null	null	null	null	null	null	null	null	null	null	null	null	null
MEQLLNLDVTPYTDK Oxidation (M) @0.100000000000000.0	PGSC0003DMP400007746,Q9FPU0	2	48.9824	898.447	69021104	76291504	138211008	34654600	125209000	60241900	116662000	78195904	20408300	72737104	58881900	33089200	126724000	65699400	40159000	40964300	42920200	51198100	45749100	42678200
EEGGFEVIK	PGSC0003DMP400007746,Q9FPU0,B9DGD1,Q56ZK3,Q43127,Q6K0Q3,A1BQV9,Q69B32	2	34.9411	504.258	25838200	30717200	25282200	6696200	20983500	28540700	35284700	18763500	6114440	19543100	12931100	7070080	28678300	20735500	15149900	22524400	17807100	15640400	15742400	15589500
EEGGFEVIKK	PGSC0003DMP400007746,Q9FPU0,B9DGD1,Q56ZK3,Q69B32,Q43127,Q6K0Q3,A1BQV9	2	28.1538	568.305	10378200	15210800	11613700	3209280	25331300	18561400	17903200	15067000	2902480	14180700	6837430	3135550	17724500	11542800	4885520	9103800	9802060	13362000	4846730	8676010
WNYDGSSTGQAPGEDSEVILYPQAIFK	PGSC0003DMP400007746,Q9FPU0,Q69B32,Q5QJ64,Q9FPT8,Q9STA0,P12424,Q56WN1,P400040866	3	58.963	991.474	5909650	10007800	29414390	4794680	18768840	10363830	13581700	4149770	2785840	11396700	6000860	6434080	16620800	10060800	4599740	6774190	9725600	12102600	7298550	10500350
WNYDGSSTGQAPGEDSEVILYPQAIFK	PGSC0003DMP400007746,Q9FPU0,Q69B32,Q5QJ64,Q9STA0,P12424,Q56WN1,Q9FPT8,P400040866	2	62.159	1486.7	null	null	null	null	null	null	null	null	null	null	null	null	null	null	null	null	null	null	null	null
AAQIFSDPK	PGSC0003DMP400007746,Q9FPU0,Q6J995,Q6J996,Q6J9F1	2	29.1112	488.76	121869000	176350000	118470000	35311300	261875008	209506000	179676992	142308992	39556600	154532992	67556496	43618700	179902000	117861000	110602000	139332992	224623008	224750000	98042304	210604992
GPEFATIINSVTSK	PGSC0003DMP400007881	2	52.7598	732.394	3891200	4279280	11131600	1533190	14632800	7266240	9681860	7968330	1888830	8075750	4659350	null	9467240	5170980	2090020	2239250	8167680	6417980	6435320	2994180
FAMAGVAGILLTDLLR Oxidation (M) @0.0010000000000000.0	PGSC0003DMP400007918,PGSC0003DMP400007919	2	69.2879	838.978	21813800	17667600	13674105	16544100	24227200	19050100	16053700	29420900	16056300	21025300	16677100	15522200	10021700	21700400	18355300	21431800	21399800	29451700	38110000	21214728
FAMAGVAGILLTDLLR Oxidation (M) @0.0010000000000000.0	PGSC0003DMP400007918,PGSC0003DMP400007919	3	69.2228	559.654	3325370	1898020	1687810	2644120	4970070	3462430	2031540	4541920	2088650	2970520	2791700	2641300	1399860	3346640	2848900	3411510	2862590	4979480	5611690	3167410
TSIIPFAAILDGR	PGSC0003DMP400008109,PGSC0003DMP400008110	2	62.0351	687.396	6402660	3839320	5523050	5030880	7906550	4195980	4232910	6725370	3454220	4439160	6668720	3034010	6649760	4201600	5224190	4920390	5503410	8673610	5333500	9097990
YFQVCVSNPTAR	PGSC0003DMP400008207	2	38.9065	721.351	9666210	5719160	4401920	2420010	6274150	7135870	5434010	9133510	13930500	14498500	22772700	9852960	8522570	15225200	15651800	7313010	19798000	41880100	37418300	58105400
AALDLLFEEGLDNVIAR	PGSC0003DMP400008234,PGSC0003DMP400008235	2	70.7587	930	null	null	null	null	null	null	null	null	null	null	null	null	null	null	null	null	null	null	null	null
SPAVPALTK	PGSC0003DMP400008234,PGSC0003DMP400008235	2	29.2346	442.268	31073000	75479200	23155700	14120700	26679700	26052100	24343600	41775000	15626800	14992400	15009400	10493200	38714900	47246500	31617600	27145500	33615900	43953100	23243400	51919900
ALSLPTGLGIVCASPK	PGSC0003DMP400008234,PGSC0003DMP400008235,Q56YA5	2	51.8864	792.449	14013900	30063100	19591700	12779900	17340200	14676300	12034700	30763500	9907500	9014440	17650900	11919700	29957500	29031200	12707200	6421770	24205200	23856200	21933300	26568700
LAVEAWGLK	PGSC0003DMP400008234,PGSC0003DMP400008235,Q56YA5	2	44.4222	493.789	22298500	32143500	27308900	10450300	10039500	22189600	13393300	34532400	10397200	9926790	12461500	6547260	29236400	19175900	20991200	8086900	23268000	26295700	24276800	23299700
LGTYWPYTPSIQLLYGLR	PGSC0003DMP400008234,PGSC0003DMP400008235,Q56YA5	2	66.4148	1071.08	6310160	5640460	4660520	1792080	3005730	2556190	2289890	4863990	2638790	2099070	null	1432980	3969920	7573960	3990960	2923110	7201520	2838840	4700710	null
FGSGVAAASAFLQNSTPLIPSRI	PGSC0003DMP400008235	2	61.792	1152.63	15214100	15361700	12475100	9670370	8970100	6910990	5275010	14969200	7593920	5551820	6883190	6693290	11511000	19211100	null	7128770	17064900	16483000	12379300	12772700
IEALADAAR	PGSC0003DMP400008292	2	27.9561	465.257	29455700	26268800	10775100	6290450	25532300	23875400	19608700	26320100	11353700	19098600	11859800	6690820	22152800	19239100	18136100	15711300	24883000	47276200	15048200	28897100
ATLLDLVGR	PGSC0003DMP400008394	2	50.4338	479.292	12935200	10306900	21870000	3851630	19731300	12678300	9911960	14129700	2189760	13124200	8780410	3417870	13969500	9622340	9514230	9876840	20637200	24312300	12749100	18829300
LIELEALQK	PGSC0003DMP400008394	2	43.0093	528.821	17148000	16122300	23236800	3473500	19695300	18862300	14661900	13751900	3477350	21193500	9611940	3225020	29182200	8509350	8681530	12190900	26110900	23287400	18752300	16786700
FSYEDIPADLQELAEEYR	PGSC0003DMP400008398	2	68.4025	1094.51	2233010	2008330	9965610	null	5721360	null	3395810	null	480849	5794410	null	null	3064090	1320890	1739880	2338570	3726530	3558140	null	2348670
ELAESIQK	PGSC0003DMP400009092,Q645M9	2	23.3975	459.251	19355300	25032400	7807970	6778780	13799800	15824400	9878990	13871900	4046140	6181610	6155950	3183670	19425800	13953700	12260000	10507200	12313800	17443800	10190400	18020900
IVIGLYGDDVPQTAENFR	PGSC0003DMP400009292	2	51.1012	1004.02	76244896	85193200	108171000	67814400	142896992	95492304	95163400	125586000	56359600	89274704	76755400	64321700	105583000	119319000	104024000	77020704	117925000	156006000	136392000	142315008
IVIGLYGDDVPQTAENFR	PGSC0003DMP400009292	3	51.3895	669.676	12155540	16477700	18797470	6685390	39801000	18885930	10593300	18129300	9071370	6243830	11160750	5469650	32288280	19212530	16217180	17661060	25302880	49234048	31914380	27552100
VYFDISIGNPVGK	PGSC0003DMP400009292	2	50.8223	704.881	21009100	20491800	33656400	12248400	42218800	24869600	20756900	36810500	17248400	29526400	22070200	14036800	34950600	33409100	30772000	19953700	35616700	38427400	38005300	33025400
TFKDENFK	PGSC0003DMP400009292,F4K2G0,Q9ASS6,PGSC0003DMP400009293	2	22.8965	514.757	24528600	15095400	10202900	10429900	27627600	21249100	17989800	27594100	9283960	15821700	11055400	4995560	18490200	16978200	15693600	20772500	16647200	19978200	21119700	27748900
LIECQETDR	PGSC0003DMP400009292,PGSC0003DMP400009293	2	21.5644	582.272	4794280	4554390	3021300	1340970	8486230	7338030	5458000	7633090	2544980	4110180	3415810	1847370	5587040	3938160	5476960	3018060	5482360	7266960	6299760	7743730
LEAAQAQAAER	PGSC0003DMP400009317,PGSC0003DMP400009318	2	20.6336	579.299	2647970	2757900	2918950	765203	5069080	3469970	3174390	3798410	1295790	2913960	1533060	890427	3452510	2161210	2245310	2920910	3221140	4161320	2696290	3784460
EAHPEGAINVQIYR	PGSC0003DMP400009643	3	35.956	532.945	23614800	21081500	10698800	7965320	16178000	20375500	13454200	19108500	15327500	20442400	28994200	26831300	25704700	46646000	43398100	31671800	27200400	28930300	37018400	56853900
ENNFVILDVRPEAEFK	PGSC0003DMP400009643	3	50.7805	640.67	18227300	23132900	23311100	15547800	25850600	22103300	16418400	26926800	16134100	18413200	32079000	34317100	37402100	43716200	44206460	17785300	25844800	31922400	36209000	45308300
IIVACSSGGTMKPTQNLPEGQQSR Oxidation (M) @0.000000000010000000000000.0	PGSC0003DMP400009643	3	29.7995	859.095	14994700	21552200	7936430	6687970	22643100	21466400	10986700	20542900	7766990	10143700	11436200	12684400	23071200	24754600	27539300	11564600	15061500	23619700	19196200	31176400
SPAEEDWSTKR	PGSC0003DMP400009643	2	23.7596	653.309	5078220	2844400	2385780	2802350	5187570	5176710	3652690	5507480	2811260	4634950	4283140	4358620	4713940	7031940	7221610	5017970	4343620	4401910	6122420	11796800
GICEGIETVLK	P400010176	2	45.5585	609.822	18777690	25386500	31448420	11120730	18536600	39071200	29230700	34149700	12320400	24586800	24704220	12246870	25566800	15516700	25696610	9568950	23722280	42717600	26097170	33434450
LEVSQQETNTR	P400010176	2	22.1186	652.827	13132100	13860900	4928850	8533670	12885500	13488300	9369030	11492700	5049810	7802070	8716120	4606030	11428900	10522500	12785800	9607390	7122930	7476990	9867340	15602700
SLANKELNDK	P400010291	2	17.3148	566.304	631019	577855	null	218200	640228	784790	null	863742	486470	null	330535	305302	null	1278030	1352130	536574	768951	3863860	1882570	6830140
RDLNVIGFGLIGWLAPSSVPVINGK	P400010435	3	71.1072	874.831	null	null	null	null	null	null	null	null	null	null	null	null	null	null	null	null	null	null	null	null
TIAMDGTEGLVR Oxidation (M) @0.000100000000.0	P400010643,F4KCG2,Q8H135,Q9C5A9,Q541W2,P83483,P83484,P400053275,P17614,O82722,P400053197,Q9SAQ0,Q9ZR78,O82721	2	32.02	639.824	56171100	51049700	16723000	13181500	35225100	22789700	17550000	34475900	12534100	18699100	15617200	6383200	27885500	27437400	30038000	36124100	26791000	30075100	20282500	29623700
AELQFLALLPTLRPNVR	P400010794,P400010795	3	62.28	651.058	17265000	6712690	9734460	16272800	20108300	14973300	12557100	24306400	11592600	15777800	18431600	12457500	11750900	14837700	null	14079000	17331100	30603400	36869900	25695500
VIAECGNWR	P400010794,P400010795,Q9LVM2	2	32.1329	552.768	null	null	null	null	13287800	null	null	null	null	null	9620100	null	null	13375500	18471700	null	17870200	34762600	19591900	24513600
YGDLWDFTVK	P400010797	2	53.7157	622.306	7379720	9538050	6890800	6313010	6581850	7328930	7326660	8070940	7096880	7912140	11123900	7815140	6304800	13312000	9346820	7643340	9220560	16177700	13517400	10175500
TNGIDIEDYVFGK	P400010797,P400010796	2	54.1226	735.863	10658600	9083040	6196720	8562410	7704950	10465600	11277000	11506300	9508550	11074300	11178600	10074500	9372320	18145200	11624200	10269400	10262100	17890600	14435500	22895000
TILSVDDILALIGDR	P400010972	2	71.0588	807.461	null	null	4008330	null	null	null	null	3256850	null	null	null	691306	null	null	null	null	null	null	null	null
VGINYIPK	P400011688,P400011690,P400011689	2	35.5249	452.27	29854800	24720600	10203800	10226100	14361300	32951600	27343200	29721400	14418300	18001800	17369600	11679900	31105400	25182300	27118200	22319800	20825700	28149900	30696900	39884600
EGLLALSFIQNLK	P400011688,P400011690,P400011692	2	64.7394	723.425	8244450	6680580	10388100	7284590	12684000	6611600	11909200	14170800	4910910	6953630	8819400	4971420	10459400	6284440	null	3402900	4048710	7160220	8119250	5472600
SGTEQDGGFTEAQLQQLR	P400011690,P400011688,P400011692	2	41.5884	982.973	18593400	11423900	9923580	9126430	16616600	18097600	15267700	18951100	7472080	11252900	13670900	6911890	13432700	8476310	9779060	12860700	7782060	14532900	12029900	15931300
KPSSKPADLVLK	P400011690,P400011689	3	25.2166	428.263	16078700	13542200	4048060	4889700	16207100	16632100	11672700	17285500	6583340	7840330	6934110	4463780	16480200	12425200	15175100	12200600	9541010	20517100	12859700	17062100
SQMQTIITR Oxidation (M) @0.001000000.0	P400011729,P400011730,P400011731	2	23.3799	547.288	13582800	8347540	5720270	4364690	12221000	11847400	5630730	5548120	2210760	4779500	4254100	1377000	10721400	5641800	9441870	7731400	5505420	12548200	6239500	12475700
WLLSFGGFR	P400011991	2	59.5815	541.795	4217580	2012460	3991050	1964000	3541030	2304550	2231090	3086610	1937100	3927970	2085520	1903940	1745730	3503970	null	2919460	2828470	6913810	3888130	3044940
ANFSEEDLIINFIAAVK	P400012128	2	71.1554	947.507	4034690	5598770	4024130	558399	3558020	null	null	2229360	491528	1590100	null	null	815363	2426690	null	null	2825460	5689110	1682390	809034
NAGADIVGGEDLIEQIK	P400012128	2	49.8928	871.458	48492100	40513400	65528520	30032100	57686928	42139200	37792728	50908300	22918450	37415380	44770700	25922850	51470700	51840700	58531100	36028300	37307432	63388700	44735500	67653400
VAVLTQGEK	P400012128	2	23.5986	472.775	10883500	11355100	9105120	3846800	13122400	10364900	12104400	9934720	3969910	9637190	4873080	2730990	12058600	6048510	7416440	7138740	6044530	10608700	6309960	9376430
YNDQQLR	P400012128,F4J296,Q9LY66	2	19.7598	468.731	null	3070060	null	1271070	4388640	3726770	2360310	3828770	1241920	1281940	2430460	1139430	3987150	2326610	null	null	2432700	5602060	2883200	5048350
ASAEYIYDVPDGWK	P400012177	2	48.0185	807.382	4966160	2525710	6657570	2013080	6020660	5064710	4826250	7902790	4294930	4461390	9313650	null	8352710	2816350	3443630	3043800	1304870	null	3798660	null
ASAEYIYDVPDGWKER	P400012177	3	43.6814	633.638	37872000	18791400	19709200	17584800	25082100	43445700	23602000	31300100	24018100	23334000	25751400	4847860	35296100	13734700	37045900	20364700	23376500	47185400	28986000	41641700
EYLTYLAGFR	P400012177	2	52.0922	616.822	40114300	41831700	34751300	28083600	72013200	51824900	45656800	58583900	38398200	38958200	50774600	13106500	67909104	31293500	29123700	28152900	27319600	62234000	55963400	61311900
GTNGTDSEFYNPK	P400012177,E0X9N3,Q0WLK8,F4J2A4,P82658	2	29.0107	715.318	39236700	21775600	17514400	15126700	44413100	51696000	23958900	38582600	21262600	25823400	29707200	5230030	32009100	21730500	33195200	31219700	21503000	39440400	23929000	49491900
YFENSQDEK	P400012365	2	20.7793	580.249	2739610	2341670	2847350	940360	5453890	3779060	3417680	3741650	1329830	2528960	2373960	1182700	2341680	2954850	3438510	2484440	3998620	6136370	4153610	7147630
ISALAESR	P400012430	2	22.2827	423.738	3690820	4559230	3395700	1268840	6682020	5208160	5163030	4832490	1136780	4077630	1858900	824156	5745630	3129590	2634800	3951780	4051880	4117360	3261730	4135170
TLNLFDILDSEK	P400012499,O80361	2	62.4723	704.375	13894100	7716240	28338200	8544520	18319000	10593700	15409000	20622300	9532020	18124900	16873100	7354870	14587100	7147290	null	7885680	10806200	12601000	11876000	12071100
FYTTDFDEMETLFNTEINK Oxidation (M) @0.0000000010000000000.0	P400012744	2	53.8342	1187.53	27851900	25113100	42911600	16762200	24937400	26065900	11178900	7505220	6380770	25222400	16074200	6783930	25524300	23338000	21144900	14968700	17257500	29106900	17028100	17023700
LIAVSESDEIPLVK	P400012744	2	47.0329	756.933	88036000	74756896	127153000	29752600	69935696	98733264	31129400	25829100	16536200	67087700	73894496	18716900	108709912	64840000	68426496	33823900	69151400	109358000	71587904	95002704
TDFYEGIGLNTK	P400012744	2	43.4297	679.339	50316600	33357300	65640300	15466700	42371500	40768300	22591700	19819700	9667840	38208700	27885100	8588720	55865900	23325400	35314200	18638700	35235300	47853400	32073300	43265712
TNPEFICYPIFK	P400012744,D3VMR0	2	52.819	764.883	13975500	16221100	15543400	10691100	43540700	29201100	11281800	9778080	9065110	21618400	29849300	4895800	31113200	15446200	12989100	6090870	26024700	41454100	27305700	39475300
NLNEAEFEALLQEFK	P400012744,F4J0U9,Q9M591	2	63.9887	897.954	37598300	23375300	61372000	14632900	41502700	27753400	17766600	19410800	10890300	50620600	21356700	7252640	30953200	27269800	null	14291300	22289400	29618000	28897600	17840200
HGDFFSALMK Oxidation (M) @0.0000000010.0	P400012744,F4J0U9,Q9M591,D3VMR0,D3VMQ6,D3VMQ7,D3VMQ8,D3VMQ9	2	40.3144	584.779	null	17547700	35608600	6653260	21859400	22295800	14260300	6541190	6387010	27074800	17922100	4635190	38510500	12091700	27778100	19409400	22938800	38859600	21511500	26590000
FIFYATYLSEK	P400012744,F4J0U9,Q9M591,Q84RD7	2	52.7803	691.359	31060600	24080600	29701000	15822200	48308900	28967500	17705400	14176400	7855040	27926800	24714500	8403750	44736700	30412500	22617800	16650700	27162900	47172400	29274100	35017200
GLSDFNLALDLGFLTK	P400012744,F4J0U9,Q9M591,Q84RD7	2	70.8953	862.469	null	null	null	null	null	null	null	null	null	1306480	null	null	null	null	null	null	null	null	677013	null
IFPAVLDVENPEFK	P400012744,F4J0U9,Q9M591,Q84RD7	2	53.6723	809.434	null	null	null	null	null	null	null	8326880	null	20459800	null	null	null	null	null	null	null	null	null	30208800
SCTAEFSGFLLYK	P400012744,F4J0U9,Q9M591,Q84RD7	2	53.2167	761.869	11451700	12324200	24817700	7388630	19283000	18483600	7533160	5967700	4682720	19303700	17169600	3240990	29460200	19484800	11093100	null	17682900	28241800	16737300	21640800
TNPVVAEIFSLMSR Oxidation (M) @0.00000000000100.0	P400012744,F4J0U9,Q9M591,Q84RD7	2	59.3999	790.415	58608600	31190000	47693500	18700500	65585600	44937100	20261800	16195520	11112100	41208100	29515200	9786210	null	43082500	29767300	15550400	37998000	68049200	39334300	44670700
VTNAGCCGVGR	P400012850,P400012851,P400012853,Q93YW8,Q9FK75,B9DHL0,F4JSC9	2	15.2214	575.758	null	null	null	null	313850	341934	null	null	51670.8	111196	null	null	579974	108683	null	null	338164	250589	116992	176265
EAEEACAEDPVSGECK	P400012908	2	26.1548	890.857	2212190	1395720	3404270	571933	6496330	2269920	3277030	2131590	899385	2499560	1756060	809414	4240880	2243110	2110170	789469	3902810	3540390	1542250	1991370
NLQSQTPIK	P400012991	2	24.6818	514.792	19045800	21257400	4139010	6956370	8938610	11092900	5042000	9307860	4830450	6911160	10566200	7650330	10175300	17448700	22198600	20332000	9064670	20648300	15253200	24696800
AGGIFLPLVK	P400013033,Q9LXV3,B3H4S6,Q93Y83	2	51.7681	507.823	33975600	44904300	26399700	25355000	43658800	38236800	27792200	33100500	15219400	34572600	55170400	22022000	38031900	38691300	37735300	35621600	33907700	46125500	47530000	56514200
AKPVSSGSPWYGPDR	P400013055,P27491,O64449,Q41447,O64446,O64450,O64448,P27492,P12470	2	30.2301	802.4	352628992	238714176	58632000	102601880	221965024	302274656	218954000	336784064	194651008	166434000	165500976	108010000	258031328	218133088	382188992	273330336	171991008	446340032	324816960	438878912
AKPVSSGSPWYGPDR	P400013055,P27491,Q41447,O64446,O64450,O64448,P27492,P12470,O64449	3	30.6607	535.269	1627760000	1315570050	547742020	772801980	1090300030	1579229950	1190829950	1675869950	1076160000	932691970	1176780030	853747970	1436440060	1131980030	1990460030	1254019970	1159129980	2227760130	1650960000	2075830020
FAMLGVVGAIAPEILGK	P400013707	2	68.1302	843.49	1111510	4478420	5817570	null	3260510	null	null	4074930	2882190	9545270	4541620	3503980	null	1763360	null	null	6194310	9901860	6032010	2968520
FAMLGVVGAIAPEILGK	P400013707	3	70.4359	562.661	null	null	null	null	null	null	null	null	null	958921	null	null	null	null	null	null	null	null	null	null
FAMLGVVGAIAPEILGK Oxidation (M) @0.00100000000000000.0	P400013707	2	60.1407	851.488	1239180030	711393020	500832992	711196990	844016000	873467010	829811970	1211600000	634886020	561761020	818844990	606147970	898284030	1119100030	842168000	631070980	696288000	1166889980	1120589950	1306249980
FAMLGVVGAIAPEILGK Oxidation (M) @0.00100000000000000.0	P400013707	3	60.0165	567.995	171976000	103213000	72561024	101440304	143148608	176678000	149134000	190835856	110260000	87717400	118713000	116445856	229569024	157598000	113564000	135600816	101813000	206191008	187528992	213650000
QGANRPLWFASK	P400013707	2	37.221	687.87	156591008	95224896	13015000	20741500	36577000	99439504	66056500	90216400	49920100	48872200	43061700	22186500	59376600	79062200	94024896	74801104	78832896	153306000	102676000	124304000
QGANRPLWFASK	P400013707	3	37.2267	458.916	522931008	364240992	101582000	172448992	258451008	400168000	256482000	357020000	190056992	168635008	221883008	135120992	230570000	306299008	336807008	243512000	287479008	490951008	405132992	463307008
QSLSYLDGSLPGDYGFDPLGLSDPEGTGGFIEPK	P400013707	3	64.6522	1176.9	94064576	64630368	46067700	67292048	84287504	66211928	47463752	64879740	45709920	37888408	40777340	40804368	61931980	70627312	57862800	41132408	47196328	85805600	67179848	73538200
FQDWAKPGSMGK	P400013707,P400036884,P27522	2	37.7001	676.327	null	null	null	null	null	null	null	null	null	null	null	null	null	null	null	null	null	null	null	null
FQDWAKPGSMGK	P400013707,P400036884,P27522	3	37.0161	451.221	null	null	null	null	null	null	null	null	1070550	null	null	null	null	null	null	null	null	null	null	null
FQDWAKPGSMGK Oxidation (M) @0.000000000100.0	P400013707,P400036884,P27522	2	27.2355	684.327	216020000	178260000	28765100	51710800	174124000	206560992	135726000	215094000	119811000	107184000	64157900	59081600	141810000	211308000	176396000	125563000	94668096	289140992	122678000	195655008
RFQDWAKPGSMGK Oxidation (M) @0.0000000000100.0	P400013707,P400036884,P27522	3	26.5887	508.587	129978000	91485800	39683900	74328000	137343008	149004992	101028000	160860000	97968800	82298704	109627000	83354496	100510000	163880000	181632000	99505800	102919000	181636992	132963000	198135008
QYFLGLEK	P400013707,P400036884,P27522,Q0WR83,Q2V2R9,Q8LCR7,Q9SY97,Q43381	2	42.6447	499.274	3117769980	2358220030	926814020	1326019970	1486840060	1971160060	1925510020	3230609920	1559059970	1259110020	2108419970	1267740030	1906860030	1930360060	1805639940	1498989950	1825330050	3108509950	2364420100	3284179970
GLGGSGDPAYPGGPFFNPLGFGK	P400013707,Q6RUN3	2	60.182	1105.04	164720992	111118000	89311696	115923000	130645000	121382000	141808992	176531008	115395000	98345800	152559008	99803296	149579008	154028992	113771000	86930096	89780200	163131008	162730000	171658000
GLGGSGDPAYPGGPFFNPLGFGK	P400013707,Q6RUN3	3	60.3094	737.032	9780870	5133560	null	2844160	6882130	null	6913220	10829900	4904500	4148720	null	3794710	17620100	8560650	3932190	3366750	2745870	14384200	10984000	12921300
GLGGSGDPAYPGGPFFNPLGFGKDEK	P400013707,Q6RUN3	3	55.7713	861.087	800246020	457203008	274388992	551062020	713086020	598516990	529022016	569246020	548073020	409782016	797009020	490670016	698924990	779142020	721459010	485516000	540972990	929348990	815038980	1185920000
GPEAQGDFTR	P400013804	2	22.8674	539.252	15905900	11482300	4508530	9049800	15512800	16962900	10375600	13685000	7082940	7658810	9260670	5642610	14428400	14531700	13916300	10473800	10636900	18122600	13485300	18110400
ISSLEPQGTAK	P400014505,P400014506,P400014507,P400014508,P400014509,P400014510,P400014511	2	24.2278	565.808	18252200	18235400	10028100	9192460	24803600	26463800	22669600	27924500	9111170	12559600	12839900	8627320	21245200	20166800	21700700	22138600	20841100	28302500	25422900	33051900
IAGGPLGEVVDPLYPGGSFDPLGLADDPEAFVELK	P400014557	3	72.0045	1185.6	53259200	45395000	9789495	37509100	65702700	34664000	8610120	null	null	38113400	null	null	25696200	104464896	null	null	28461700	17047600	53235100	5309730
NGVNFGEAVWFK	P400014557	2	53.003	684.344	228907008	255175296	92207800	195876992	234764000	247012016	212404992	229000992	181700096	156247360	248960992	189562272	270139008	387135008	275860992	158791296	144246000	414310912	365444000	401420096
STSSSSPWYGPDR	P400014558	2	32.6169	713.818	293971008	245194000	89567400	161794000	255212992	249430000	213100000	287011008	207267008	147696992	169278000	165082000	218140992	321449984	311568000	199532000	168344000	270844000	272337984	349199008
IFVAGATGNTGK	P400014573	2	26.3781	568.311	48811900	55260300	19366400	16666200	37849500	42854800	27861900	39199800	18965000	26954000	18200900	15824500	38772800	32688400	24730400	22786000	25372900	56260800	27593900	32363700
LADAIGNDSDAVICATGFR	P400014573	2	48.2242	983.476	10303800	9191510	11311600	7620250	8547130	4367170	6824800	6356830	5078130	5608640	14116800	5984690	10573100	9690410	7612360	2306190	8940100	11889800	7451170	7868610
LQAEQYIR	P400014573	2	31.8747	510.779	30708000	26704500	6133160	8855240	19225100	11000100	14011800	14161500	9483410	12368100	13688900	8934070	17347600	16946000	17668800	14990300	14803600	22374000	17010700	20634200
SLDFLAPWK	P400014573	2	56.4871	538.795	11115700	7179930	8784670	7048120	7977120	5714480	6058210	6359750	5460640	5984030	11279600	5886310	8819800	8894890	6356530	4118460	8311460	9205450	10027000	9427530
STLPGQNPDLQIVK	P400014573	2	39.3759	755.42	53306500	38682400	34423600	21726200	26295800	25462500	24538600	32938900	20549200	23437700	32739500	21984100	37197300	38433700	44685000	33855200	34347700	47144400	38690900	43455600
KQIPDRPLWYPGAK	P400014894	2	36.6997	834.968	94614096	62757600	3389770	9408980	20629000	81696304	46851600	80654096	36394300	36730900	64619200	11435700	52181200	70109200	99882200	82924600	77353800	127044000	88979600	97608000
KQIPDRPLWYPGAK	P400014894	3	36.7237	556.981	2369329920	1933010050	556089020	1030369980	1466489980	2152209920	1561859970	2389570050	1408720000	1319420030	2180519940	1115100030	1665730050	2274700030	2753200130	1884979970	1910969980	3099739900	2529070080	2520130050
KQIPDRPLWYPGAK	P400014894	4	36.734	417.988	483134016	360654016	14466900	26886800	69381600	226692000	169060000	130465000	70235000	103449000	114169304	38235700	227168000	229844992	341075008	179276992	386228992	726115970	441276000	392992000
NGELDPEKR	P400014894	2	19.4729	529.267	42258128	38999600	18431380	13814590	49397208	50432128	41090528	52897832	27538960	31766410	26737750	10192160	42149912	36420500	43813632	36853200	33683700	52921128	43097660	62114740
NLAGDIIGTR	P400014894	2	52.4367	515.29	230463616	7548362200	4567722500	4025687300	4524003800	7072191000	6668234800	8134510600	4814096400	5037544400	6098758700	3888739840	8395375600	7263726600	9719884800	6848952800	7695835600	12532873200	10062284800	12428424200
NLAGDIIGTRTEVADVK	P400014894	2	43.1308	886.485	41587700	19454200	9701810	16427900	17697100	55021200	12784900	37752000	18234500	15200500	19000500	23647900	17164700	44686700	55940700	42517400	70950800	105749000	51226000	186868000
NLAGDIIGTRTEVADVK	P400014894	3	43.2845	591.326	87569696	41464200	15421500	28049100	32217600	118772000	23187300	54966900	38406300	28953200	26908100	44092100	47896600	104923000	126142000	62612900	205842000	310247008	151070000	404647008
SPEYLDGSLVGDYGFDPFGLGKPAEYLQYDLDSLDQNLAK	P400014894	3	70.1606	1470.7	null	null	null	null	null	null	null	null	null	null	null	null	null	null	null	null	null	null	null	null
ATLQLAEIK	P400014894,Q0PWS7	2	38.3427	493.8	3838259970	2657590020	1622649980	1346969980	1736969980	2040550020	2314109950	3220019970	1824029950	1796839940	2425120000	1321360000	3053080060	3122569980	2831990020	2138450050	2411670020	4320000000	3117929980	3894249980
KATLQLAEIK	P400014894,Q0PWS7	2	32.7963	557.847	499740992	409855008	149334000	215350000	323345984	483353984	327691008	465180992	251522000	290303008	248580000	235456000	374958016	489567008	531552000	447419008	398804992	706064000	562208000	813451010
LYPGGSFFDPLGLAADPEK	P400014894,Q0PWS7	2	66.9012	997.504	1902437630	1224964860	1032986750	1516329340	1793318400	1593309950	1313025920	2096398080	1381068160	1128946690	2085060610	1335255810	1633367040	1989918340	1286847360	1316112640	1399999740	2108258690	1843936640	2152184060
LYPGGSFFDPLGLAADPEK	P400014894,Q0PWS7	3	61.1895	665.338	36902800	23760000	22117480	61198200	37886100	44748600	16449900	54014040	27217900	9803055	44356900	18137766	40137900	31407400	null	32330900	38340900	90049600	72814496	82703000
LYPGGSFFDPLGLAADPEKK	P400014894,Q0PWS7	2	56.9966	1061.55	534975840	327434432	178050000	267447008	338503872	364916992	332449216	433242560	334956640	295116992	580742720	349004000	434449984	512928512	401643840	260738000	328017280	566230980	502536000	564846400
LYPGGSFFDPLGLAADPEKK	P400014894,Q0PWS7	3	64.5701	708.037	6308639700	4432761300	3135389440	4303438800	5557578200	5223434800	4489657300	5276710400	4208883710	3657406210	6951943700	4228122110	5883264500	6265389100	4649090000	3360177150	4183555840	6826814000	5946772000	6751774700
QIPDRPLWYPGAK	P400014894,Q0PWS7	2	42.0511	770.921	402715008	282166016	147790000	97839104	140924992	291785024	246926000	387476000	181396992	178008992	185724992	116004000	252682000	204466000	259532992	160954000	273988992	419787008	358648992	424396992
QIPDRPLWYPGAK	P400014894,Q0PWS7	3	42.1043	514.283	1787900030	1520380030	903174020	915900990	1174230020	1614809980	1281959940	1908249980	1107960060	987518980	1271360000	857540990	1452429950	1128790020	1195820030	807548990	1327939970	2264999940	1799049980	2034179970
RLYPGGSFFDPLGLAADPEK	P400014894,Q0PWS7	3	56.9722	717.371	67207000	38776152	147611600	48241500	64146100	60539500	41035400	55249400	51387460	52158800	72492600	65959700	54766900	88584800	61911600	60618100	111484000	109738000	88603504	151309200
LAMVGFLGFAVQAAATGK	P400014894,Q9XF88	2	66.8228	876.484	1224190	6831960	3064780	null	3029230	null	null	4537070	1472370	2617830	1317260	1433500	null	1668840	null	null	3923160	9321480	3949710	null
LAMVGFLGFAVQAAATGK	P400014894,Q9XF88	3	69.8196	584.656	null	null	null	null	null	null	null	null	null	null	null	null	null	null	null	null	null	null	null	null
LAMVGFLGFAVQAAATGK Oxidation (M) @0.001000000000000000.0	P400014894,Q9XF88	2	65.7337	884.481	1498852100	1034617220	543852860	725714500	1125768190	917786750	870724740	1120176130	835285310	628956860	743298690	707141180	992741570	1251700740	37578704	804097860	965145410	1805582850	1312725760	1173841410
LAMVGFLGFAVQAAATGK Oxidation (M) @0.001000000000000000.0	P400014894,Q9XF88	3	59.2624	589.99	416336000	284319008	118860000	177054000	330447008	267531008	218868000	249760000	228176992	142616992	175376000	189566000	345656000	346547008	null	230528992	267184000	609840000	333176992	301928000
ECELIHGR	P400014894,Q9XF88,Q9XF88-2,F4IGY6,Q0PWS7,Q0WW97,Q07473,Q9S7W1	2	21.9916	507.246	20880700	24131600	7177280	6499250	21659400	23035900	23560800	33026800	25333300	27374300	23299200	12083700	29018000	28909900	29125300	15392100	22043100	41394300	39708500	57689700
FRECELIHGR	P400014894,Q9XF88,Q9XF88-2,F4IGY6,Q0PWS7,Q0WW97,Q07473,Q9S7W1	2	27.3916	658.832	42018500	54870700	1269250	3616140	38795000	50464700	34795300	41960400	27781500	43215900	7855250	7733420	49150700	64176300	58895500	34675100	23321900	153954000	53064600	113399000
FRECELIHGR	P400014894,Q9XF88,Q9XF88-2,F4IGY6,Q0PWS7,Q0WW97,Q07473,Q9S7W1	3	27.393	439.557	595283010	733780990	135855008	290308992	780875010	862940030	599196030	918544000	634048000	799843010	560030980	527880992	758782980	992211970	737728000	396847008	716382020	1833769980	1120099970	1555529980
STPFQPYSEVFGLQR	P400014894,Q9XF88,Q9XF88-2,Q0PWS7	2	62.9191	878.444	5830073900	5964484100	3136382980	5289903600	6737965600	6060996100	5903264300	7224728600	4783684100	4363652100	7297851400	5538673700	6935796200	8623379500	6058789900	4008224260	5431491100	9609281500	7857056800	10177163300
STPFQPYSEVFGLQR	P400014894,Q9XF88,Q9XF88-2,Q0PWS7	3	52.5023	585.964	330176992	329668992	106866320	181777200	430282624	413888704	229252912	267713088	173365392	97221904	264346000	172513408	545928000	477067008	323088992	229304288	345852480	784252030	470062016	526715008
TIQDSLEDISYLLR	P400015046,P400015047,P400015048,P400015049,P400015050	2	64.1616	833.443	20898000	15373900	16042400	14576900	24459800	15198200	14735000	33738500	17889100	17248200	23905500	9379240	11165800	16471800	20401400	10610600	16462700	23796300	23443600	15798900
IQVVIDGFSAPLTAGNFAK	P400015047,P400015048,P400015049,P400015050	2	56.401	974.535	27674700	14822800	19686000	17060000	26395300	17990000	14046000	25401400	19220100	16383600	22752200	14500700	22116300	21568300	15586700	14488700	19982300	25993600	24260300	20339500
LVVDGAYDGMK Oxidation (M) @0.00000000010.0	P400015047,P400015050	2	29.366	592.289	32718330	24858700	10190858	12334600	27198370	29039750	14509300	34687448	14874690	12522400	15664660	6895617	22417800	18316820	20841000	19340800	13691300	23971180	17424400	20836000
KPFGTMEGNVK Oxidation (M) @0.00000100000.0	P400015048,P400015049,P400015046,P400015047,P400015050	2	19.3332	612.308	4230240	2747700	2603980	2414460	4687520	3903600	3287330	6262220	2567520	1981240	3212580	1216720	3956830	2824010	2322940	2517390	1192750	2691540	2257050	2427980
IQFIQGTDEQTIPDVK	P400015087	2	44.6089	916.48	21681200	17827100	18927300	6245210	15364000	33632300	17246400	17526300	10739300	16131700	11605700	12384700	25187500	19931400	34373900	19313200	30813100	35975600	28752900	36788900
LTTAILSHLMSK Oxidation (M) @0.000000000100.0	P400015179	2	39.5733	665.876	21012900	19186900	14128100	10189700	14519700	18133200	16445600	25440900	12069700	18062500	21999900	14368200	20309500	20515700	31446900	25221800	19910100	37594900	28491800	32625400
LTTAILSHLMSK Oxidation (M) @0.000000000100.0	P400015179	3	39.6411	444.253	45383200	45295200	20015900	null	22588100	26040700	28350700	30146000	20461000	31879800	28191700	17948000	42149000	45428100	47654700	34472500	49353000	76679400	61597300	66460000
MGFEDIYVSSPGSFSEK Oxidation (M) @0.10000000000000000.0	P400015179	2	46.7414	948.426	41549700	35924300	34435700	26368600	22624400	32392800	26689000	46581900	19733600	20279400	28017600	24115800	34822700	36958200	37720200	21414800	21063500	27372900	21502700	25135000
TEEPGMFSFGWEPEK Oxidation (M) @0.000001000000000.0	P400015179	2	49.0067	893.889	16917800	13090000	13020400	8774380	12048300	10081800	10410300	18744000	8395400	10157400	21240400	10661100	14022900	13119300	14185300	7465610	6380310	14073100	10186300	11542900
YETIDQGR	P400015179	2	21.4158	491.233	52219400	37311012	14998550	35474160	43306180	50469060	32182440	49259032	24625260	21766220	34736352	17799670	34661060	41733448	39492440	36651008	19229750	32433440	28703160	44384948
FSDGGTVELTVR	P400015179,P400015180	2	37.6839	640.83	55179900	49441500	28333900	16917700	22423900	29739200	32253340	35052200	25112300	25235200	23311500	20092700	42025600	43830000	28348200	27757900	24756300	37999000	42732800	60070800
GGIALVINEILEPNPK	P400015179,P400015180	2	62.7933	838.987	60812200	47883700	43969600	52977700	50173800	39576100	37024000	73311104	36029800	52585900	56277100	41732600	40074500	40623000	51734100	37590500	41542900	49830000	69675696	48937100
SASSSSPWYGPDR	P400015464,P400015465,P400014577,P400014557	2	32.7565	698.813	1204950020	1016929980	413000992	652092990	921350980	1144790020	831632000	917134980	753166980	630416000	688529020	637728000	1005040000	1316320000	1323299970	822756990	755361020	1163520000	1098370050	1475929980
TLFAQIATR	P400015506	2	41.3528	510.798	4760450	7075790	14880600	1506670	9323590	9083840	12184300	7668120	1895970	9007370	3768050	1863320	11589100	3243400	3652010	4508550	7260500	8931350	4573790	5881250
NIEQHASDNVNK	P400015542,P400015544,Q8VWF9,Q8W3J2,Q8W3J3,Q8W3J4,Q9FJF1,Q9LZD4,Q9LZD4-2,Q9SWV8,P28186,Q40177,PGSC0003DMP400006174,P400027216,P400033284,P400048235	2	16.7616	684.829	null	951803	212299	381292	747003	687789	227068	754272	474216	807525	390896	149091	772637	260098	1046120	900419	1455650	638472	457554	1593000
INQPDQGAGSSQGAQK	P400015544,P400015542	2	15.5744	793.382	2033440	2050110	773268	1410130	1567110	1030090	663112	1429800	503992	1594750	792213	547581	741105	771392	1866270	863003	1823660	1632920	1650190	null
LGTGALVSGYSASFVPK	P400015761	2	48.2119	827.449	63213800	51142000	42440200	33662800	57905200	53783800	41604400	47449000	27369400	40130300	68069504	37906900	73158896	63016100	64446500	34733600	44562200	73668200	54935800	53759200
SGITVISK	P400015875,P400015876	2	27.0035	402.746	7482900	8976830	6093600	1402960	14303400	10987800	9275880	null	null	6928720	1876100	1861870	12506100	6948490	4114580	5256590	9302080	9311020	5324200	8930350
VPLGIGENTR	P400015875,P400015876,P55243,P93230	2	31.4998	528.298	20488710	12927400	13347760	2708520	26326390	13009560	16254000	7535280	2832510	18323090	9768630	3177390	25157110	8838360	14346450	19745720	17368410	21837200	11143810	19370270
LSDLVADSVK	P400015906	2	33.9506	523.79	6143450	12160540	2457490	2986947	2083430	15034480	8641030	10493288	null	13308100	9965280	null	16558840	11998290	9996530	3786600	13231600	18402500	8570360	22151620
GIAQFENAVK	P400016292,P400016293	2	37.9038	538.792	23021000	16937700	11209400	6282980	13919500	13847100	9938400	9264460	7019410	11127700	9516300	4437760	14741600	13976100	12852300	15453200	18530600	27914200	22430400	29700400
SGLDPVLGDYLTK	P400016388	2	50.2312	689.37	24135900	24195700	18572000	16755200	21333200	18081300	14323200	14304700	7766930	14591500	22097800	12099600	15956900	20892300	21555500	15504600	15402900	22954000	18224600	21909200
DLYEQIVASR	P400016435	2	45.5944	597.314	5103860	3763180	10196200	1790150	4642170	10268800	7372250	5340350	1693920	5493830	4060530	3086530	5755520	3034290	4469810	2225950	5273200	5681820	4576170	null
GGNPDSNTLISDMTTVICLDDYHSLDR	P400016435	3	65.2036	1003.79	null	null	null	null	null	null	null	null	null	null	null	null	null	null	null	null	null	null	null	null
HADFPGSNNGTGFFQTIVGLK	P400016435	3	55.5966	736.371	10562100	7836870	25221400	5795170	28998300	15025300	13365000	8593170	5948690	22850300	17491300	13375000	26300800	13236800	12336000	12883500	33712500	40575400	22582200	37187600
IRDLYEQIVASR	P400016435	2	42.7015	731.907	35820800	30818500	30485800	8147070	27446800	23694600	35473500	36000700	7536400	34171600	17068200	9643420	41127100	22059000	19157300	29479300	50131300	41945500	27225300	41189200
IRDLYEQIVASR	P400016435	3	42.567	488.274	52715200	61090500	63505900	18910400	67418432	66365560	65236100	55884400	15576000	60322900	36269600	24405600	85481800	43883100	31910800	46438300	91078400	91923152	52996700	71806304
LTSVFGGAAEPPK	P400016435	2	37.1695	637.345	39665200	41954200	30784400	9347840	35372100	42788600	40295500	27865400	8916230	32376600	25733400	11154000	33564000	30086200	27236200	39273100	43252400	55201400	34715400	40966700
NFNPVYLFDEGSTISWIPCGR	P400016435	2	66.7726	1236.59	6468690	6989360	6812510	null	10143600	4139700	5053720	2932570	1877760	8385700	null	null	null	5584580	3554010	2453110	10496100	6229610	4759280	2096390
QYADAVIEVLPTQLIPDDNEGK	P400016435	2	58.9152	1214.62	16573700	15191500	29816000	6808790	21482500	9520150	13703200	6064310	2718550	13339100	6459380	6290200	14733200	10273800	5719900	5948770	12382000	13416200	7086580	12192800
QYADAVIEVLPTQLIPDDNEGK	P400016435	3	58.8712	810.084	10109900	9597280	21898200	4713930	17077100	10004200	8788150	4840680	1112700	8127050	2579450	3696700	20135800	7909760	3998370	7140300	8588470	11983300	3679210	9665430
RLTSVFGGAAEPPK	P400016435	3	34.3631	477.267	16622400	12125100	12332900	2571470	14819400	17449800	12849500	9666340	2663030	12934100	6552700	3300910	18256700	11916900	5853500	13245000	17085400	22638500	8396340	16392100
TVVIGLAADSGCGK	P400016435	2	36.4348	674.353	null	28482900	28751500	7730910	41762000	33949000	33721100	25235100	8900780	35909000	17803200	8253640	43985400	23749300	26470400	18468500	56007500	46521600	26637900	43511700
ANDFDLMYEQVK Oxidation (M) @0.000000100000.0	P400016435,P25697	2	39.8927	744.843	492929984	415892000	293192992	163976992	403224000	431048000	294028000	473614016	331391008	366735008	290363008	157536000	287568992	393116992	529504992	223060000	741441980	956147010	742353980	889756030
FYGEVTQQMLK	P400016435,P25697	2	44.5588	672.338	null	null	3176920	null	null	null	null	null	null	1515720	null	null	null	null	null	null	null	null	null	null
FYGEVTQQMLK Oxidation (M) @0.00000000100.0	P400016435,P25697	2	33.88	680.337	79549200	34802600	62175300	null	71548200	52500700	68816304	45327400	12219000	49808900	28566200	21498420	82444800	56159900	23552600	67573200	52075500	76638896	44991800	71117400
KLTCSYPGIK	P400016435,P25697	2	27.2106	583.817	40001700	43198600	38312500	12879900	82694896	68617904	42956900	39072400	12869300	47363100	14789200	13871700	61342800	37302300	22956500	22170400	44820700	61560300	28340400	38932800
APEEALMILVPEAYQNHPTLSIK Oxidation (M) @0.00000010000000000000000.0	P400017124	3	54.821	860.788	6090830	11781600	14603200	3744490	12156800	7738810	17080600	5483580	null	11436800	8271730	3605320	12878200	8286100	3618140	4882000	null	12241200	5423970	8047710
ISDAIENEK	P400017124	2	22.5036	509.757	23086300	30532900	18899600	6301930	37996400	33139500	31988300	22159700	6226320	22202900	9641070	7110040	32201800	22550860	20363600	24136300	24640000	29195600	19199400	28531100
NILEAGPENASQVILPSPVLNEGELESLLK	P400017124	3	70.0986	1058.57	null	null	null	null	null	null	null	null	null	null	null	null	null	null	null	null	null	null	null	null
NLIEAHVEK	P400017124	2	26.1786	526.792	13225100	16700100	12471500	5080850	28160400	18509800	19180900	11189600	6216790	21826800	9680300	7891280	22696200	20496000	16809500	22640200	25248600	31099100	20796500	20187100
NVAAGMTGGLAYILDEDETFVPK	P400017124	2	67.7204	1206.09	null	null	null	null	null	null	null	null	null	null	null	null	null	null	null	null	null	null	null	null
SVPVDSSVVGYYAK	P400017124	2	40.1894	735.881	5744280	20979800	30816000	8041850	19428900	15887600	28524700	14013800	5780920	19674900	11566800	9070780	29747300	12941100	18796800	23588300	24393300	33721500	15137600	15070000
VVAPVGQTQLK	P400017124	2	29.1919	570.345	52922100	61217000	35486200	14558500	81097800	68601000	58477200	47925700	11967100	47613900	20510300	14590600	70840600	51228200	44101200	61038100	65125100	83039800	29778900	70945904
VVKEENVDDIER	P400017124	3	25.7275	482.249	12281300	18494300	12076000	4055450	19505700	10271100	17906200	8243520	3327040	12996400	6417070	4264360	18307800	11645200	9576050	10474700	12316000	14649700	9663470	8362340
YPEVLDFYNYYK	P400017124	2	56.4567	807.384	11511500	10525100	27343600	4827500	19777300	10919100	16909900	7066780	3151060	13027900	8341080	5519340	18620000	13300700	4699110	6535650	7735200	8740920	6855750	9944590
GLQNGDTATSAIK	P400017124,Q7M242	2	25.7425	638.332	16708600	19889300	13254200	5426170	28501300	16398900	20227600	10216300	4424210	16135700	8704410	6162720	20571000	17434500	16267200	18538600	19369400	26975500	15305200	15467700
GNADIIQISGHDGGTGASPVSSIK	P400017124,Q7M242	3	39.9851	761.055	null	2488290	5944840	727988	2318450	3308160	3344320	3256120	1476060	7499480	4467870	2450350	5801820	3083520	4126250	6379200	7131460	9495490	5500450	8448700
IAQGAKPGEGGQLPGK	P400017124,Q7M242	3	21.8541	503.28	7928990	11074100	7519480	2681960	16434200	16944200	13318100	9122370	2132200	8354980	4100470	3088160	12116200	8773250	8302750	10397400	11695900	14644500	8365420	13434200
IAQGAKPGEGGQLPGKK	P400017124,Q7M242	4	19.1293	409.735	17529100	28742900	15064900	7110810	43484200	36152600	28464300	22955600	5728730	19227000	10596700	8419470	31142400	23054700	22805000	25022100	32827800	40774700	22590000	38214500
LIGEANDYVGK	P400017124,Q7M242	2	32.127	589.808	33025200	37453500	16656000	8295810	31291000	28767800	32763700	24729300	null	24576200	9735140	9697970	34397000	null	22522100	31136500	31379900	36108700	21080200	33083200
TDILRPR	P400017124,Q7M242	2	22.8703	435.762	13937400	14540100	13884500	5556000	23543300	19588200	18249500	15138500	4377970	14335900	6689890	4449570	17437100	14648600	10597300	15102400	12400300	14111400	10814000	15886800
VEPASAIVQR	P400017124,Q7M242	2	28.4695	535.305	34808600	48753400	30458600	10664500	66041100	57149600	50938800	36418700	9950120	37891900	16341400	12261400	51488200	35978800	26463600	29483800	51558500	68406096	17411600	36490000
SNSGEGGEDPIR	P400017124,Q7M242,Q9T0P4,Q9ZNZ7,Q9ZNZ7-2,Q540F4	2	20.4785	609.273	9448761	10849418	9016060	3277029	17557274	13815900	12824508	11067670	4140430	9976640	5808347	3701910	12728656	9925750	9735580	9879782	12903400	17813110	10988710	18031710
SNSGEGGEDPIR	P400017124,Q7M242,Q9T0P4,Q9ZNZ7,Q9ZNZ7-2,Q540F4	3	18.3087	406.517	4285500	4375340	1409370	1444210	4525310	4365460	3339340	6561240	4542430	3376960	7526740	4457040	4214990	5556660	6584090	3343650	6896950	17389700	11950700	20673000
ICHTNNCPVGVASQR	P400017124,Q7M242,Q9ZNZ7,Q9ZNZ7-2,Q540F4,Q0WW25	3	22.1269	571.605	3840160	8043400	5294690	2287140	8184010	8365470	6159400	5930070	1694360	7375000	3701470	2576010	7094530	5615260	5242570	2107350	10924800	8483050	6359620	9434430
FSTNTSPR	P400017124,Q9T0P4	2	20.619	455.225	null	4838930	3252230	1319150	6533500	5651550	5034280	null	null	null	1829890	1601600	null	null	null	null	null	6649900	4030790	7014330
FAQVTNPAIDPLR	P400017124,Q9T0P4,Q9ZNZ7,Q9ZNZ7-2,Q540F4	2	43.2665	721.397	20614500	20726400	37288500	7087020	23356900	22810600	32460700	19374300	4714720	21146600	12895100	8080480	33237500	13416800	12157500	12094600	20713800	26707900	14478600	18957700
TPSAEYVNASR	P400017263	2	24.3667	597.793	26004710	22666200	46797672	10713620	20849180	18600860	14393600	26078000	11002520	20041930	18715360	12255790	18510610	28170000	26344110	28682940	39857900	38741528	24036500	27072500
LELQEVVDFLK	P400017466,A1KXM7,B9DHL9,Q9FH02,C0Z226,Q39102,P400017467,O82150	2	61.9487	666.878	210768512	160559360	240122976	180438256	275650784	164816352	176779008	269109408	136601760	182721232	270348000	140212528	234689584	160264000	6929630	107249000	94045000	162071008	205061968	134408928
VAEEVIFGQDNVTTGASNDFMQVSR	P400017466,A1KXM7,C9DFA3,O82150	3	56.0422	905.429	null	null	null	null	null	null	null	null	null	null	null	null	null	null	null	null	null	null	null	null
VAEEVIFGQDNVTTGASNDFMQVSR Oxidation (M) @0.0000000000000000000010000.0	P400017466,A1KXM7,C9DFA3,O82150	2	47.9791	1365.64	48415700	43115000	37690600	26400900	45314500	31110500	28129100	45694600	25116500	27097800	41534500	24218700	33849400	35358600	39588200	21175900	20223000	25694900	31996200	31210100
VAEEVIFGQDNVTTGASNDFMQVSR Oxidation (M) @0.0000000000000000000010000.0	P400017466,A1KXM7,C9DFA3,O82150	3	47.9761	910.765	179619008	139340992	138204000	89769600	179040992	156204992	109795000	157978000	62970900	70020496	130154000	85524896	212782000	143928992	146276000	109567000	102386000	132517000	124981000	86552896
ETVDGEEFMSLFIDGK	P400017466,A1KXM7,O82150	2	66.2545	908.92	null	null	null	null	null	null	null	null	null	null	null	null	null	null	null	null	null	null	null	null
IGQVAIGGGGGNPFLGQQMSTQK Oxidation (M) @0.00000000000000000010000.0	P400017466,A1KXM7,O82150	2	43.6207	1131.08	108200000	81825696	69179600	42405700	64580500	84659000	71668704	90895400	45071400	60068400	66972600	37324500	75407000	50679300	92523904	41473000	54522700	77617000	77105696	80123600
IGQVAIGGGGGNPFLGQQMSTQK Oxidation (M) @0.00000000000000000010000.0	P400017466,A1KXM7,O82150	3	43.6185	754.386	84768800	62390200	64764600	46897100	71229000	87589800	52426500	67503104	31444800	40523400	45440300	35434500	88014304	47329900	85315800	46498400	50468900	71678400	67383504	68200496
KIGQVAIGGGGGNPFLGQQMSTQK Oxidation (M) @0.000000000000000000010000.0	P400017466,A1KXM7,O82150	3	40.4036	797.085	63719000	89370096	70037296	54866500	91841400	87709696	72547296	102118000	44619200	56977400	87241400	47516800	84183000	67774496	106417000	81593504	75679696	99507504	99425400	84094400
DGSTLQLTAVDGR	P400017466,A1KXM7,P400017467	2	37.498	666.844	156616000	119252000	75985104	52699600	87120400	107047000	83715904	105622000	63027500	84738496	76111200	41961300	96400800	81722600	88690496	85700200	58826700	103682000	97638304	102167000
DGSTLQLTAVDGRR	P400017466,A1KXM7,P400017467	2	33.5749	744.895	43515800	33966200	6423700	9015830	20592300	37865100	14905000	27433800	14797400	18862800	15549700	11971200	20980200	35321600	46097200	38333400	39367800	51616600	41041000	67287904
DGSTLQLTAVDGRR	P400017466,A1KXM7,P400017467	3	33.5781	496.932	123676000	89277800	28071000	49601900	75717200	124328000	44822900	83154896	50382500	58867400	58086200	46498500	72309104	111036000	143260000	114493000	115652000	152034000	110934000	188168992
TQAQPASDLPEGTQWR	P400017466,A1KXM7,P400017467	2	37.2127	892.936	161516992	128532000	80822200	67591904	106909000	138250000	88622096	126578000	88978400	107758000	88462200	69975000	92285600	126861000	154988000	122357000	117924000	170036000	141164000	162039008
FQEVPETGVTFADVAGADQAK	P400017466,A1KXM7,P400017467,O82150	2	47.2468	1090.53	164152000	160119008	156372992	106768000	104314000	158632000	120175000	133690000	90628896	116145000	193878000	114945000	152556000	122913000	149135008	65359200	72573696	125507000	120996000	132507000
SKFQEVPETGVTFADVAGADQAK	P400017466,A1KXM7,P400017467,O82150	3	44.0171	799.068	66210800	45415100	40798700	32661600	50927500	49111600	34143400	44401700	30746700	37903900	48743200	32891900	45328500	37279900	58592200	28297500	42263900	54593800	55325500	70597104
SQGGPGGPGGLGGPMDFGR	P400017466,A1KXM7,P400017467,O82150	2	47.077	850.895	null	null	null	null	null	null	null	null	null	null	null	null	null	null	null	null	null	null	null	null
APCIVFIDEIDAVGR	P400017466,A1KXM7,P400017467,Q9FH02,Q39102,B9DHL9,C0Z226,O82150	2	57.8668	837.934	75635104	63065500	55926900	55053500	86624800	67037100	50689700	59528800	64185300	64953200	93620896	55360000	82011296	78815104	60645300	32129800	72664304	99288400	101624312	97248200
DYSMATADVVDAEVR	P400017466,A1KXM7,Q9FH02,B9DHL9,B9DHN3,O82150	2	48.7736	821.375	null	null	null	null	null	null	null	null	null	null	null	null	null	null	null	null	null	null	null	null
DYSMATADVVDAEVR Oxidation (M) @0.000100000000000.0	P400017466,A1KXM7,Q9FH02,B9DHL9,B9DHN3,O82150	2	41.0092	829.376	154203008	159758000	144136000	100021000	170830000	215304000	140168000	134802000	90086304	117929000	129525000	92184400	180184000	121916000	207372992	152654000	111775000	158087008	144876000	182870000
LESGLYSR	P400017466,A1KXM7,Q9FH02,B9DHL9,Q39102,B9DHN3,C0Z226,C9DFA3,O82150	2	26.2663	462.744	314280992	286951008	117078000	117350000	300982016	308563008	207344000	199384000	135586000	174498000	174022000	101410000	261520992	221708992	269964992	208942000	157430000	277830016	229100992	204656000
LVAYHEAGHALVGALMPEYDPVAK Oxidation (M) @0.000000000000000100000000.0	P400017466,A1KXM7,Q9FH02,B9DHL9,Q39102,B9DHN3,C0Z226,C9DFA3,O82150	3	44.1459	856.441	6076270	10260200	8939530	4439540	10973300	15400300	6228950	9211120	13568400	20595300	13327300	10353400	13072600	8554700	16804400	6024720	24201400	30002800	24082400	31090400
RTPGFTGADLQNLMNEAAILAAR	P400017466,A1KXM7,Q9FH02,B9DHL9,Q39102,C0Z226,B9DHN3,C9DFA3	3	67.291	810.757	null	null	null	null	null	null	null	null	null	null	null	null	null	null	null	null	null	null	null	null
RTPGFTGADLQNLMNEAAILAAR Oxidation (M) @0.00000000000001000000000.0	P400017466,A1KXM7,Q9FH02,B9DHL9,Q39102,C0Z226,B9DHN3,C9DFA3	3	55.1508	816.093	247947488	149339920	109251992	160361824	186980768	177348240	115663800	146643296	128631568	121537016	202564944	131067592	183365088	183335504	172595296	120501816	171444384	240070992	211824000	285962496
SYLENQMAVALGGR	P400017466,A1KXM7,Q9FH02,B9DHL9,Q39102,C0Z226,B9DHN3,C9DFA3	2	52.0593	754.881	null	null	null	null	null	null	null	null	null	2741410	null	null	null	null	null	null	null	null	null	null
SYLENQMAVALGGR Oxidation (M) @0.00000010000000.0	P400017466,A1KXM7,Q9FH02,B9DHL9,Q39102,C0Z226,B9DHN3,C9DFA3	2	36.9948	762.881	376835008	307376000	137496992	144916000	235167008	278036000	207830000	246940000	133991000	179224992	264471008	121633000	149036992	255108000	312159008	261548992	200583008	303508000	246920992	309996992
TPGFTGADLQNLMNEAAILAAR	P400017466,A1KXM7,Q9FH02,B9DHL9,Q39102,C0Z226,B9DHN3,C9DFA3	2	71.4128	1137.58	null	null	null	null	null	null	null	null	null	null	null	null	null	null	null	null	null	null	null	null
TPGFTGADLQNLMNEAAILAAR Oxidation (M) @0.0000000000001000000000.0	P400017466,A1KXM7,Q9FH02,B9DHL9,Q39102,C0Z226,B9DHN3,C9DFA3	2	59.1948	1145.58	137833504	104128000	96591504	83642200	114120896	80108800	77102600	80644304	67771104	78808496	80764896	69881904	74960000	98348096	78377600	50636900	59297400	103273800	95627696	98358800
TPGFTGADLQNLMNEAAILAAR Oxidation (M) @0.0000000000001000000000.0	P400017466,A1KXM7,Q9FH02,B9DHL9,Q39102,C0Z226,B9DHN3,C9DFA3	3	59.1809	764.058	109286496	91022304	88252928	82008800	129954600	107469904	74425200	77289904	59638900	68609696	67327296	64358200	103405504	95307600	73246000	70126096	60223700	117866600	85011200	84060000
EISKDEISDALER	P400017466,A1KXM7,Q9FH02,B9DHL9,Q39102,C0Z226,B9DHN3,C9DFA3,O82150	2	37.1839	752.881	121045000	101378000	25915400	23430700	41524900	70689104	62288700	87835296	38609500	62008000	33799500	29680900	53579300	65259400	79488400	82111000	61863000	108710000	80969200	106640000
GQAGGLTFFAPSEER	P400017466,A1KXM7,Q9FH02,B9DHL9,Q39102,C0Z226,B9DHN3,C9DFA3,O82150	2	45.8425	783.885	195206000	200312000	190978000	117650000	151510000	264378000	198823008	258402000	120823000	170298000	245231008	139654000	243812000	156392000	250740992	120720000	143967008	223435008	229604992	217727008
GQAGGLTFFAPSEERLESGLYSR	P400017466,A1KXM7,Q9FH02,B9DHL9,Q39102,C0Z226,B9DHN3,C9DFA3,O82150	3	52.3811	824.748	36219700	33953000	11928200	33698300	65645700	54828300	18817600	40225100	24642300	24115000	36502100	36346200	34114200	73682016	65632800	44603200	75685904	104654000	78134000	144016992
LVAYHEAGHALVGALMPEYDPVAK Oxidation (M) @0.000000000000000100000000.0	P400017466,A1KXM7,Q9FH02,B9DHL9,Q39102,C0Z226,B9DHN3,C9DFA3,O82150	4	44.1487	642.583	12971700	20952300	18044300	9177480	19608200	25282000	13752800	20971500	28583000	32339500	27255700	19331100	23259500	17176900	28591100	10207900	43492900	61322100	51164900	56769700
TPGFTGADLQNLMNEAAILAAR	P400017466,A1KXM7,Q9FH02,B9DHL9,Q39102,C0Z226,C9DFA3,B9DHN3	3	71.4128	758.724	null	null	null	null	null	null	null	null	null	null	null	null	null	null	null	null	null	null	null	null
APCIVFIDEIDAVGR	P400017466,A1KXM7,Q9FH02,B9DHL9,Q39102,C0Z226,P400017467,O82150	3	57.8863	558.958	5793260	4086500	3904370	3563420	9239950	6359980	3456970	3478900	4564160	3218420	4882600	3161460	7925580	6406530	4556050	2389330	5824820	9502180	8504150	7055400
NPDKYTALGAK	P400017466,A1KXM7,Q9FH02,B9DHL9,Q39102,C0Z226,P400017467,O82150	2	23.0578	589.316	112973000	100106000	27131000	62872100	94602600	99825000	66016700	93650600	45098900	64915500	50609300	27948300	81267200	70080304	89756600	75886000	56309500	97012400	99998128	122626888
QVTVDRPDVAGR	P400017466,A1KXM7,Q9FH02,B9DHL9,Q39102,C0Z226,P400017467,O82150	2	25.2635	656.854	57726200	54613800	7796850	9495590	28895400	27848800	25573000	26299000	16955700	25572400	16535300	9387120	34726600	31499500	47516500	37969900	29065400	52274900	39981800	19236300
LAQLLIEK	P400017466,A1KXM7,Q9FH02,B9DHL9,Q39102,O82150	2	38.0667	464.299	122908000	106907000	92101504	38912700	74174800	88847400	86934200	85991696	63432400	88696200	79687400	42460400	106459000	78722000	58528000	65543400	80965200	133155984	106919000	110033000
YSEFLNAVKK	P400017466,A1KXM7,Q9FH02,Q39102,C0Z226,P400017467,O82150	2	33.5144	599.829	48276900	36314700	10974200	18441000	28468000	44917900	18934800	33283300	23227600	23977100	24711500	19644300	25960000	41587200	50569300	47630200	39430700	57171000	46196200	82937296
YSEFLNAVKK	P400017466,A1KXM7,Q9FH02,Q39102,C0Z226,P400017467,O82150	3	32.2324	400.222	91523400	82457904	14807800	22576100	38761300	80179696	32265500	50880000	30654900	40030800	36252300	25407100	50303400	75149696	113032000	79422800	103978000	113718000	100426000	170908992
YSEFLNAVK	P400017466,A1KXM7,Q9FH02,Q39102,P400017467,C0Z226,O82150	2	39.1021	535.782	221138000	168763008	149296992	83357800	122823000	123998000	122164000	163392000	93493104	124648000	143474000	74597000	168556000	132583000	164955008	122658000	120749000	187735008	169364000	188131008
GCLLVGPPGTGK	P400017466,Q9FH02,B9DHL9,Q39102,C0Z226,P400017467,O82150	2	35.6206	578.315	232116992	241514000	102631000	114295000	137476992	295560992	178368000	294968000	168000000	210900000	213624992	129516000	252328992	237372000	287007008	169948992	271646016	284358016	309832992	377680992
VPTPNVSVVDLVVNVEK	P400017652	2	57.0811	904.516	22216000	21622500	31907800	9570470	35242600	25560500	23308700	19048300	9290060	28053200	17557400	10744200	36780800	21087600	12594400	16385800	32902100	35791000	26554600	27089700
DSPLDVVVVNDSGGVK	P400017652,F2Q9V9,P400051213,P09044	2	45.899	800.419	43738200	51382200	79078096	22359800	44005200	71166496	69254896	57734900	16010700	50434100	36217100	25642600	66578100	33713500	47620700	31246800	60916300	66830900	41875600	60581500
GITAEDVNAAFR	P400017652,P09044	2	41.15	632.326	4077490	16650770	24565260	null	null	8484720	15504500	20280730	2771130	16826100	2915060	6070600	22629010	7099650	10416680	14423850	20850200	26383500	19327810	14720870
VMDEELGIVK Oxidation (M) @0.0100000000.0	P400017652,P09044	2	34.1358	574.799	45382100	53873100	33322300	12293600	36514100	56446800	41896100	34711500	12081800	38745700	19081200	10695000	46150300	32828700	20439600	37324500	45352700	49296700	31245000	45251000
GKLNGIALR	P400017652,P09044,Q0WL92,P25857,P400051213,P400020414,C0Z2Y9,B3H4P2,F4HNZ6,Q9LPW0,Q570E5,Q42213,F2Q9V9,P25856	2	27.7232	471.298	82580400	76889200	39965300	30381200	130799000	121095000	82747504	86919904	29767090	85931000	28058200	26208300	102978000	74873400	33321100	70305600	84824600	101575000	49542500	80704704
YDSMLGTFK Oxidation (M) @0.000100000.0	P400017652,P400051213,F2Q9V9,P09044,Q0WL92,P25857	2	33.2227	539.252	93785296	89662600	60560600	23730000	73815104	98568096	90468304	53351000	19353600	57581500	21470700	20162000	83304600	60593000	49357100	67081200	67614896	72120000	45327300	75993504
GTMTTTHSYTGDQR	P400017652,P400051213,P400020414,P09043,C0Z2Y9,B3H4P2,Q9LPW0,F4HNZ6,F2Q9V9,P09044,Q0WL92,P25857,P25856	3	20.6751	519.235	966219	1514961	1370050	279890	1294987	997509	845004	3216634	934008	3466221	1514676	668545	1037100	2007319	1675150	1460740	4101019	4977260	1810925	3927930
GILDVCDAPLVSVDFR	P400017652,Q0WL92,P25857	2	58.2285	888.458	5172620	7379270	16037500	4243790	14903600	8897910	9369740	7525080	2543830	13238100	10503700	3309510	15282700	7670280	4685940	3346940	16485800	13667700	11116100	9502640
GTGTANQCPTIDGGVDSFAFK	P400017746	2	45.9324	1072	12267000	12197200	11938100	7082960	6071040	13810900	11449500	15975600	6972760	9154040	13141100	5835590	13531500	6471400	10997500	1789020	4807080	8154580	7363540	10107800
QLVASGKPESFSGDFLVPSYR	P400017746,C5MR70	2	48.3955	1142.59	336852000	290124000	165856000	164220000	287313984	247656992	226996000	292936992	155196000	188471008	253936000	222820000	315183008	386080000	396436992	142932992	259150000	400430336	319383104	309572992
ITFTVTK	P400017746,P26320,C5MR70	2	32.5575	405.237	5400718800	4398296600	1248579460	1743702780	2201836290	4020527870	2585435140	3104366590	1942249980	2178594050	1569106430	1500989950	3477182460	3642831360	3946746620	3176501500	2877757950	4467152900	3513720060	5213457400
GRGGSTGYDNAVALPAGGR	P400017746,P26320,C5MR70,P23322,PGSC0003DMP400004990,E5LP98,Q40459,Q84QE8,Q58H58,Q9S841,P23321	3	29.7836	592.633	491586816	464861888	165270752	240989024	320739328	492665920	330710528	489142304	247746528	265647520	364621440	203463424	462362112	288938912	489341696	394914976	256673504	573489790	433264032	593074560
GDEEELQKENVK	P400017746,P26320,P23322,PGSC0003DMP400004990,E5LP98,C5MR70,Q40459	2	21.3432	709.345	655851010	619001980	199584000	243284000	615529020	635326980	510799008	650902980	293764992	376136000	387096992	200820992	539033020	500224992	536662016	443867008	355996000	600073980	525632000	760112000
LTYTLDEIEGPFEVSPDGTVK	P400017746,P26320,P23322,PGSC0003DMP400004990,E5LP98,Q157M6,C5MR70	2	65.0009	1155.58	4076445180	2656594430	2918894590	2864239360	3091875580	2399216900	2865438980	2528981500	2071250820	2199997440	3929439230	2430857730	3409986820	3087505150	2459946750	1720492160	1647999620	2480958980	2714756860	3073815300
ISEEQLK	P400017976,P400017978,P400017979,P400017980	2	22.095	423.733	18754100	17048500	12765800	12765900	20313600	17421600	12893000	null	11029200	14833000	9056700	7040250	21227400	null	18079600	14904000	12027500	16040900	25652000	26468100
LASTAEDDLER	P400017976,P400017978,P400017979,P400017980	2	27.2397	610.296	50534700	47537900	20649700	17424600	51285700	51639100	28823200	44195800	21795200	31571400	21320300	14202200	45751200	35052300	29771700	28954700	25603000	51999100	31234700	32464500
SESQTVSQEVADNSSSSDR	P400017978,P400017979,P400017980	2	27.9872	1006.94	14721100	8108810	4463460	6507400	10424400	9723750	5290390	9423220	3592020	7690710	10599400	4136420	6562760	4357630	5292330	null	5770360	12637700	6438590	9468620
DSVADPNGSPSPK	P400017978,P400017979,P400017980,P400017976	2	19.4989	635.8	6912780	6194090	4055290	2705900	8857100	7929220	4437870	7296080	3386440	5249510	5605150	2017890	6795280	5021030	6566790	5394390	4644590	6694400	5786220	7768780
DQVIEEVKR	P400018067,P400018068,P400018080,P400054972	2	26.1009	558.308	18187800	19802000	9901980	6470180	13749900	12743500	6530970	8358780	5468610	14584500	17281400	6696780	18578400	15385500	17215700	23344100	25451400	30716000	26484400	24288500
LTPNQNIILSNIR	P400018202	2	45.8291	748.436	36495100	38724600	38463900	17573900	16712800	45129900	24596000	43694400	18260000	32625000	36620500	15484300	28268600	19871700	41807400	19217500	33682400	51827300	37395900	42178400
VLEPLFFYWK	P400018202	2	63.9327	671.369	16418400	10732700	14219800	9914850	14672753	11338300	10691500	18006100	11042600	19425100	13060400	9756020	8612500	14026500	null	7849580	16458100	20271200	16844100	8885340
LAEPLGYVPK	P400018202,C0JT31,O82802	2	39.4923	543.815	37626100	30512000	26837600	12010200	18330300	20236000	18372200	22009000	12261200	25278400	21888100	11849500	25266200	22865300	32033800	22309600	26487900	41958300	27943000	33073500
TAYTDEEAEGNFLEVLQGPSLK	P400018325,P400018326,P400018335	2	58.1934	1206.09	7289580	6808880	6579140	4935060	4521860	2932990	3650810	3807350	3795090	3951280	6691670	4962090	5524410	5861560	3625390	2421320	3026940	6480000	4328440	5227520
ALGTFAVSVK	P400018610,P400018611	2	39.4127	496.794	96001104	69233504	47533700	28618800	49473500	64035400	60281100	55706900	31930700	45858600	55367400	30445300	82958304	60832100	82354704	43087600	55910900	102050000	81477400	82005000
RPLWITDALQNPK	P400018610,P400018611	2	45.6858	776.439	23754000	19724100	12108100	11986500	9481540	28155600	17730900	22661100	9133690	14890100	21228800	12750500	18376000	17502900	31179600	13868000	19245100	33778800	25235100	28672800
TELATEDAIADK	P400018610,P400018611	2	30.5442	638.819	15816400	16414800	6467700	5188260	6848600	13740600	11181900	11259500	4044930	7709240	10417300	4660070	14968000	5704930	10649200	9777760	3966610	8863830	8112390	9956180
EVEEIEEEVEK	P400018909,P400018910,C0KZ34,Q8H763,B9DGR5,Q39249,Q40593,P400018911	2	34.9257	681.322	26418200	15612400	8663600	8783370	10440500	15566500	12978400	18952600	11823700	10948800	16908000	null	13566000	9238040	11295900	14112500	8074640	10043200	14202100	14534900
IGTPDGGFFTR	P400018909,P400018910,C0KZ34,Q8H763,P400018911	2	41.2929	584.296	35522400	35203200	28257200	19002300	26177300	48220400	29822000	43075900	28412400	30115200	35408700	9598050	38151600	19017600	37325800	31640100	37204900	61624400	44393300	49394600
SSVLPESIIPELQIAAQK	P400018910,P400018909	2	58.2154	962.048	35740800	25233000	23065900	24334800	29820100	25902700	21135400	30547000	23058200	21103700	34638100	11444700	28873700	22948300	18858800	18911800	26681100	39666800	29747700	30308900
LLGIDDENAPTRDDLAACLEEINEGK	P400019939,P400019943,P400019945,P400019946	3	55.7911	957.798	3593020	2466760	3884080	3209730	9472020	4370190	null	3730750	4473100	4276310	8488300	null	7707880	null	3528600	null	4035480	7453600	6379050	7883740
ESDEGSLGDDSSKPNSVR	P400019951	3	21.9213	626.95	5037430	6197110	7416090	2208400	13778087	9188902	7155330	4977670	1326550	6539080	3967400	1626080	8444410	6171550	4637730	6609600	7754999	6659480	5577580	6832700
VEAPADVTPATK	P400020007	2	26.0393	599.821	40114200	39668300	11854900	17304500	24427100	22738400	17845000	31806200	25608600	16023200	20272500	19205400	19881000	27936000	25426900	17854000	14557300	30355100	24544500	22318300
ELYKDILGSS	P400020012	2	41.7092	562.798	54159400	40398200	17808500	15082900	35231000	47536900	28317300	42183500	20037000	27843300	43657000	23315400	37455200	42757700	43604500	44981300	48780600	76756896	57721500	93191400
IQEVWDK	P400020012	2	30.9703	459.242	195913136	165469312	51925300	52661100	115829000	98750600	96582000	104267000	95940600	112062000	119339000	60802600	115781000	129796000	197418864	139036000	163269104	234821696	210015008	290407008
IQEVWDKVDDK	P400020012	2	33.8283	687.851	34167200	29509800	7306960	7087120	16213600	25954100	20686000	23823700	14051000	18911700	20898300	10482400	22086000	34885560	36308600	27124600	30490800	45887500	37889100	52172200
IQEVWDKVDDK	P400020012	3	33.6751	458.903	101631936	85447200	27116400	26454500	45432992	71901232	50512700	57971300	41318600	56234500	65208900	33631200	61737100	90533904	96297600	63682000	77567800	116094680	97040896	127004000
NLIFKPDR	P400020012	2	30.5836	501.792	433342016	319593984	96378400	136044000	275536000	386846016	255578000	378327008	188908000	224782000	261531008	137402000	299639008	292664992	428500000	394784992	242772000	529188000	437172992	694633980
IVELVQLR	P400020125,P400020127,P400020129	2	42.7456	485.31	15477800	14801300	8344150	7348360	10830200	13183200	9597930	17290700	6503200	9829670	10633400	6143370	13727000	8915320	7897210	8431890	10914000	18108700	13546400	17449300
AVALVLPSLK	P400020414	2	48.6879	505.836	266554000	283974016	408496992	133056000	485052000	328318016	340080992	278644992	97002896	288324992	167972992	165255008	497107008	311699008	272092992	202870000	466780000	504182016	312849984	300084992
EAADKELNGILAVCDEPLVSVDFR	P400020414	3	57.1403	887.451	27756800	25023700	44158100	14426200	60491100	30381900	27375200	21215900	16953000	46756800	23993800	22909400	49317100	35823600	14742900	13303500	56265000	50504400	26724100	31883500
VPTPNVSVVDLVVQVTK	P400020414	2	61.0664	897.527	138671008	136398000	241588000	73431696	193648000	118498000	185063008	153368000	64326500	207192992	110760000	94075296	250611008	142812000	88054600	127449000	223334000	189498000	170004000	156354000
VPTPNVSVVDLVVQVTK	P400020414	3	61.0979	598.687	34535400	36683100	75623200	20856000	56331500	33513900	54312000	37352300	16270000	63697000	28367500	28637100	84633104	31420600	23054200	36558800	60594200	57263500	46901200	42022000
VPTPNVSVVDLVVQVTKK	P400020414	3	56.906	641.386	52738600	48110500	43539400	21050700	88519104	61966100	47861500	40038700	19621000	56794800	36442400	34159800	82591400	73927600	46729800	50707100	114332000	126792048	65815000	93790800
GTMTTTHSYTGDQR Oxidation (M) @0.00100000000000.0	P400020414,C0Z2Y9,B3H4P2,F4HNZ6,Q9LPW0,P09043,P09044,P400017652,F2Q9V9,P400051213,Q0WL92,P25857,P25856	3	12.8969	524.563	2766960	8594169	9780914	6.15659e+06	11283930	5817400	8135862	7634290	2343236	2442382	8072184	6045952	14567350	1743568	1285700	410018	5304639	12687580	10973040	13478950
VAINGFGR	P400020414,C0Z2Y9,B3H4P2,Q9LPW0,P09043,P400058817,P400017652,P09044,Q0WL92,P25857,F2Q9V9,P400051213,P25856	2	31.9725	417.237	244288992	279240000	94205800	57754200	266304992	229412992	227988992	162572000	61244900	188323008	89104000	65646600	289784992	196040000	193856992	237507008	335732000	330012992	214822000	322481984
DSPLDVIAINDTGGVK	P400020414,P09043	2	50.3089	807.427	70123296	74291504	114096000	41271700	119214000	87944600	89721000	70950800	26127900	81443400	59991600	43553300	103356000	82785504	72751696	58401000	102636000	109540000	70491600	101027000
KDSPLDVIAINDTGGVK	P400020414,P09043	3	44.2885	581.319	33564900	34799500	58590000	12883500	51987800	50731600	43559300	39000700	12081600	41118600	25313100	14241300	55597200	24565200	29835300	22448300	52808900	55239200	39960400	45127800
VVDLADIVANQWK	P400020414,P09043	2	57.6331	735.905	89098096	90305200	149614000	45664200	148024000	109110000	108410000	77902000	44881700	120251000	84943504	59864500	151892000	105960000	70899904	66760800	171907008	119929000	108712000	129447000
VVDLADIVANQWK	P400020414,P09043	3	57.6341	490.939	3504570	5417980	8490280	1411180	18901400	12942200	3356080	5873810	2059840	2964950	4407570	2373650	21426300	6649340	3131750	5272600	10430900	10559300	6008500	11002300
YDSTLGIFDADVKPVGTDGISVDGK	P400020414,P09043	3	51.8739	857.098	103407000	141172000	207858000	73217504	243351008	160844992	177610000	149466000	53990600	162308992	103243000	86081504	245468000	155888144	101063000	110743000	208418000	202762000	130432000	173479008
GTMTTTHSYTGDQR Oxidation (M) @0.00100000000000.0	P400020414,P09043,C0Z2Y9,B3H4P2,Q9LPW0,F4HNZ6,F2Q9V9,P400051213,P400017652,P25856,Q0WL92,P25857,P09044	2	15.5583	786.342	null	null	197270	228833	567268	244047	254535	357396	44801.7	null	193495	81275.3	754955	null	null	null	null	null	142078	324126
KTFAEEVNAAFR	P400020414,P09043,C0Z2Y9,B3H4P2,Q9LPW0,F4HNZ6,Q570E5,Q42213,P25856	3	43.7832	461.576	49142200	50749000	75658600	22542400	62057100	73840400	66068600	42167600	18688100	58631400	29458600	25409500	82084896	38671900	52614800	36888100	86914304	79484400	53692900	81689000
TFAEEVNAAFR	P400020414,P09043,C0Z2Y9,B3H4P2,Q9LPW0,F4HNZ6,Q570E5,Q42213,P25856	2	46.55	627.812	183496992	188856000	311284992	67406304	171018000	263419008	231755008	194304992	61062000	189908000	108554000	101573000	283606016	136556992	135691008	109516000	248900000	239720000	181675008	158040992
VIAWYDNEWGYSQR	P400020414,P09043,C0Z2Y9,B3H4P2,Q9LPW0,F4HNZ6,Q570E5,Q56Z86,P400017652,P25856	2	49.9783	893.917	32703100	39469088	68393400	19402880	60522900	43646992	51560000	44492900	19001060	59366500	32293720	28446750	62466500	52979400	51937500	31586110	73550400	73795800	46673480	58760900
IQNAGTEVVEAK	P400020545,P400033909,P400044110,Q9XQP4	2	25.3055	629.837	14198200	14711700	8928170	4277250	9551970	6978450	9391110	6276880	3416050	10996100	7039690	2285640	11202600	8388550	9641690	13274900	10635500	13581500	10439500	7106460
LSGGVAVLK	P400020557,P400047202,P29197,Q8L7B5,F4IVR2	2	29.24	422.27	53216900	75843104	72533200	12251200	118877000	75348704	40073900	28745500	8434900	83664096	28996000	8695020	71874096	34379900	45888600	73256400	104048000	95547104	40432000	74076704
ASVSPAFAAQFPGLNGLGLSAAR	P400020595	2	57.7876	1101.59	20243700	15034000	14844200	12179920	13826040	6889440	9819840	24768930	14156800	9877720	26121800	21400760	12652930	22688720	16609600	11053400	20118700	25623700	24908110	30473570
ASVSPAFAAQFPGLNGLGLSAAR	P400020595	3	57.5935	734.732	11284060	6619980	8075750	4735414	7194710	4552210	3214150	7533860	4600000	3890170	null	7420190	10847410	13858800	9456602	8235330	10831500	17907400	11934400	13204900
VTVNDFVFSGLSAAGDTSNIIK	P400020595	2	60.666	1128.09	9472920	7126830	null	4766440	3258580	2846370	3003200	12321000	5926990	5817360	7065640	7189300	4702870	8739220	6927710	3835250	7526570	12039300	9568300	11499300
LVEATTFLDEAQIK	P400020595,F2VPR9	2	49.9676	789.428	18205900	21333000	17500600	10529500	14905000	9910620	13752500	34574300	14175500	13645000	23037000	18449200	16333900	24317400	28690700	13624400	22487800	31088000	24318000	33033900
AGYDNIACITSGLQTIKPGTFDSVGSK	P400021009	3	53.3299	934.137	70014600	85774096	53995600	60427500	71486480	74971696	60482600	74478152	69215680	70664000	76690600	76589856	58126200	124594408	90886896	40381400	85679800	147573824	126363000	138603808
NCYHVPLFIENTDNDIGTIVK	P400021009	3	53.7478	821.41	10980800	14281700	12765300	10654700	12520800	13095300	12694000	13868600	20107000	21726700	23347400	21544400	16078400	28542700	21680700	8647200	24035700	41905200	35829800	39103300
QLHNNFAGLFFGLPFTK	P400021009	3	62.9168	651.016	10771700	5236490	12184600	13840800	14551100	15110500	11070200	24616700	19458400	25141700	29398100	21873000	13600000	29144700	null	17760800	26693500	38207900	47406100	48311800
VNPEFVQSVK	P400021009	2	32.9913	573.814	309401984	275081984	68489200	88898400	139211008	250531008	129961000	228738000	116760000	130168000	93011400	106083000	164354000	313254016	318822016	250634000	238074000	352192000	304667008	466615008
LLLVCQEGLR	P400021009,Q94AY4,O48529	2	42.6875	600.845	104782000	113219000	32464400	53193400	104815000	121821000	97367904	149496992	94774496	80078400	116338000	63597400	117925000	113366000	110328000	70608096	171214000	284332000	250735008	303857984
ASANSLAQLGK	P400021255	2	29.7353	530.292	114662816	129298200	91964608	27256490	175314464	153384832	126836000	105207344	27782720	102376296	47807440	30236900	138781072	83674840	90876432	115831520	147563264	160515696	72686416	147111424
ASSYADELIK	P400021255	2	36.0942	548.782	123734000	124035000	112654000	33327700	118538000	152368992	130169000	92171800	33367200	129142000	94067400	37955200	156548000	120360000	113015000	127119000	156196000	121003000	91213104	148520000
GLVPLVGSNNESWCQGLDGLASR	P400021255	2	56.8532	1215.1	4542820	5760060	12090000	2477610	10273900	5059910	6362090	4241150	2023410	7529650	4419190	3455710	8577730	5922280	3516600	1970170	9521510	9189340	4024860	7720740
IVDVLLEQNIVPGIK	P400021255	3	55.9228	550.669	8104390	7870770	13384500	2645160	15420400	14693300	8605100	5324060	1770890	6555080	5807420	3556610	20247300	5121480	4289080	5518120	12600800	13908100	7622120	12190000
IVDVLLEQNIVPGIK	P400021255	2	55.4173	825.5	118833504	111249400	175692000	50799300	167251392	139015808	140323808	75725600	34726600	130735200	99117696	66740700	199557504	110676496	78932600	80048304	168385088	149292704	133225696	159254208
TWGGRPENVQAAQEALLTR	P400021255	3	42.4522	699.703	5890090	7347940	16280900	2644400	14011700	12568100	12526700	9384600	3472310	10420000	2462490	2746970	11787300	5112720	4159590	6688760	10594400	12030900	7920540	10671900
LDSIGLENTEANR	P400021255,F4JUJ5,Q944G9	2	33.8979	716.36	21509800	27801400	24820652	5798540	26974760	32613700	29973600	16172100	6082580	20178800	11377900	7291790	32037200	20969500	12598800	18544300	24240900	28262400	16931200	24454300
RLDSIGLENTEANR	P400021255,F4JUJ5,Q944G9	3	31.8557	529.943	50401600	56476100	30464600	14897200	74593296	48128300	47448500	37913300	13917900	42256000	27818500	18867300	67013400	43992700	40243600	47163700	64691920	71969000	39992500	69236200
ATPEQVADYTLK	P400021255,P400046327,P400046329,P400046330	2	38.3473	668.346	142767008	128186000	187831008	39699300	138540000	130723000	165374000	135656000	39252700	128002000	75842000	45820900	192999008	124586000	96198896	125592000	168350000	187046000	113238000	168823008
RLDSIGLENTEANR	P400021255,Q944G9,F4JUJ5	2	31.7616	794.411	17398900	17114900	3925870	1457870	23322400	12301300	16532800	10930700	3190720	14593800	4932050	3208930	20492400	12678500	14649300	19639300	22032500	25819500	15308100	26298800
FAFVSSVFLPDGTPDVQLR	P400021623	2	61.4424	1048.05	21164700	13608900	12243500	12032100	17870000	9924790	11356800	20413300	10783400	13388000	18249700	12995700	16213100	21109800	12156200	12405300	16079300	23956800	22225100	18452000
LACQAIVGKPDSR	P400021623	3	25.1199	472.255	28822100	34410300	6705710	12011600	25245200	24225500	20089000	22180000	20686600	13225300	21551200	9329400	28563200	24717300	35834300	23905310	32605342	59085100	52461140	32129900
ETQPLGTSAQTDK	P400021836	2	21.0563	688.339	5865940	5752400	2050400	2074030	3629470	5457090	3228140	6469850	2387640	2253930	4273500	2609910	3725440	5610950	4856330	5652070	2306030	null	4787780	5864710
TVLEALETLR	P400021930	2	52.691	572.835	15152800	18647800	19192200	7698880	35894000	20624000	25149800	21056800	10281900	22700100	19881800	13188400	24185500	23621800	17099900	18107800	34616800	35896800	29337800	32363900
AGGVFLPIIK	P400022187,Q8L7Z8,P400012040,P400022188	2	50.1542	507.823	19659800	24764300	16569700	18014200	19162800	17497800	15221300	19010600	7278310	14435500	20859100	10252000	18243400	21080900	20122200	18137100	14400000	21553600	21819100	21736600
ASDASNLPGFTESVDAQK	P400022299,Q2HPK9	2	39.5752	918.938	19172600	18067700	8835470	17978700	2995020	2639450	1118500	3383170	2166400	12107000	23015800	7395680	7612330	10212300	65559800	27916800	14493500	10104500	5974550	12610100
AESIVQSTVR	P400022299,Q9XIV8,Q4A3Y6,Q43499,Q2WEC9	2	27.7667	545.299	19816000	21491700	1263930	12227400	null	null	null	null	null	9880200	8045280	2725440	7269250	6253860	46405900	19186400	14494600	10365800	null	null
AGGNLVDPEWLDGSLPGDFGFDPLGLGK	P400022300	2	69.7188	1422.2	16665000	10988800	6822750	3855370	9865220	7686190	6270980	9992330	8765500	6152160	971423	3173620	5051010	12657600	5741240	6956040	12289700	15640600	18258300	5604110
AGGNLVDPEWLDGSLPGDFGFDPLGLGK	P400022300	3	69.233	948.472	15138200	13978100	9933090	16104120	18934800	13136100	10084800	24328960	12538800	10773900	3456080	8582270	8654130	15097864	9688830	10362200	18248900	20941000	32758530	10951130
AGGNLVDPEWLDGSLPGDFGFDPLGLGKDPAFLK	P400022300	3	69.4614	1172.26	100373000	92195800	33484000	31068700	75474200	32583500	26918290	74839200	65128800	62168112	null	13014990	null	134795008	4011560	9582880	161239008	165049696	167088992	13947500
AGGNLVDPEWLDGSLPGDFGFDPLGLGKDPAFLK	P400022300	4	68.5587	879.449	4571050	5285570	null	7185440	8788850	null	979211	11648300	2222500	8805940	null	null	null	5396180	null	null	6156240	15232030	13730900	null
WVDFFDNDSQSIDWATPWSK	P400022300,P27525	2	65.8974	1222.55	50388400	23869800	13958900	10095000	21462200	14374200	16649500	31886100	35397200	31801300	2428760	6716510	10932700	67033000	29368840	29686440	35032500	27591400	41974600	3131740
WVDFFDNDSQSIDWATPWSK	P400022300,P27525	3	66.1033	815.37	3652680	2821430	null	4630050	2574060	null	818715	null	2435590	1034040	null	1633090	1857110	6635580	2142360	3236200	4714140	4902770	6862330	null
FFDPLALAGTLNNGVYVPDTEKLER	P400022300,P27525,P400022301,P27524	5	61.4412	556.695	16145100	7243630	3956540	17923200	24147400	24382800	6487280	24345100	12635400	6104320	12495400	17919600	20532300	20472300	null	25218200	17844800	37452400	21540700	29670500
LAMLAMLIFYFEAGQGK 2 Oxidation (M) @0.00100100000000000.0	P400022300,P27525,Q0PWS6,P400022301,P27524	2	68.765	967.996	16153770	10566500	21122700	29221700	57873000	null	20092600	35249900	null	22359300	null	null	null	92812696	null	29142300	40112700	121611008	66804700	13824900
TAENFANFTGEQGYPGGK	P400022300,P27525,Q0PWS6,P400022301,P27524	3	40.9298	629.958	397284000	412748000	188094000	161662000	267848992	517369984	293820000	309212000	203518000	228900992	169408000	174595008	510948992	392124992	577492990	381388992	510951008	989006980	809612990	969104000
EAELIHGR	P400022300,P27525,Q0PWS6,Q9LMQ2,Q9XF90,P400022301,P27524	2	20.0796	462.749	1446140	2030680	498754	677978	2494610	1671890	1271160	2874950	1452200	965558	2002790	906360	1982460	1742500	2344660	1293800	988994	3516430	2470380	4814380
KSWLPGVR	P400022301	2	34.9858	471.782	508559008	412420992	99876304	185135008	226847008	444190016	310359008	448627008	366795008	252103008	288625984	208160000	312959008	484660992	597849980	408855008	382724000	566745980	574283010	695990980
SWLPGVR	P400022301	2	40.9877	407.734	82962200	97249504	null	47756100	74477104	109453000	108563000	100296000	94256304	null	71627104	45032400	103969000	73965504	129179000	111178000	105158000	194924000	150928000	150990000
GGGNLVDPEWLDGSLPGDYGFDPLGLGK	P400022301,P27524	2	66.9277	1423.19	15814100	12043700	4376240	4303870	6447710	6400540	6907140	8755020	7481870	5826780	3818110	4857100	null	12578000	8013750	4635280	12517500	13771500	16383800	8315410
GGGNLVDPEWLDGSLPGDYGFDPLGLGK	P400022301,P27524	3	66.8994	949.132	9339030	13407200	3400360	8903410	8298920	8080350	5500170	9226260	5639200	4916590	3859680	6135920	8690790	13023200	6471350	7567680	16064800	14407500	18029100	7053910
GGGNLVDPEWLDGSLPGDYGFDPLGLGKDPAFLK	P400022301,P27524	3	66.7034	1172.92	111367104	74395976	35651500	42889792	64005560	53755272	45259808	92343496	68301912	54889820	9326890	29205910	26072090	154546208	41391400	61134072	142039808	163936000	191033488	30308230
WVDFFDPDSQSVEWATPWSK	P400022301,P27524	2	66.2878	1214.06	42299500	25474200	13717300	14737800	27953100	25736300	26005600	41126500	49864700	34623800	12238500	20572600	16364400	60716400	51854600	24936700	51101400	36478380	46998100	14516500
WVDFFDPDSQSVEWATPWSK	P400022301,P27524	3	66.3724	809.707	null	3290180	1364650	6507010	7330730	4956100	2519370	6300930	3283790	6069180	null	4409750	2462567	7619890	5883690	3719640	7617700	6878330	8120570	1044460
FFDPLALAGTLNNGVYVPDTEK	P400022301,P27524,P27525,P400022300	3	64.2717	794.41	284341248	251151808	187700000	554294980	442770112	328871168	311748256	546325630	308233728	192147856	351702016	319784672	338494016	399169888	317259936	276611136	327369120	520192512	575859460	364847968
LAMLAMLIFYFEAGQGK 2 Oxidation (M) @0.00100100000000000.0	P400022301,P27524,P27525,Q0PWS6,P400022300	3	68.4225	645.666	58801500	159592384	47945728	112572600	120701904	27769900	27311500	117116696	50499048	52238500	20452430	30504530	13580080	146583296	19442730	91116000	69928992	210581600	136637584	33367500
FFDPLALAGTLNNGVYVPDTEK	P400022301,P27524,P400022300,P27525	2	64.1216	1191.11	417096992	414847008	304988000	249104000	477806016	351336000	383894016	585750980	427696672	329207008	581875010	332624992	314488000	532159008	548483010	291528000	376272000	549276990	591790020	548918980
FFDPLALAGTLNNGVYVPDTEKLER	P400022301,P27524,P400022300,P27525	2	62.2318	1390.22	30514400	21920500	8862310	26030600	28638300	26175200	20532400	50521000	22488400	25183200	37843800	28972700	19086100	34960400	null	28496300	36454000	56269000	47132900	61462900
FFDPLALAGTLNNGVYVPDTEKLER	P400022301,P27524,P400022300,P27525	4	62.1956	695.617	225495008	153236992	68462416	295644000	331972000	312707008	150116000	406971712	223005968	148188560	230108992	265861456	215387008	257360000	null	273271008	270737984	456208000	303012992	438080000
TAENFANFTGEQGYPGGK	P400022301,P27524,Q0PWS6,P400022300,P27525	2	40.0346	944.434	2925639940	2926554370	1835675010	2051635710	2831781120	6544320	2725521920	7215380	2443060220	2177002240	2921951490	2168559870	3096627200	3069500930	4764091900	3455017730	3125291780	4842611200	3988458500	5808184300
FFDPLALAGTLNNGVYVPDTEKLER	P400022301,P27525,P27524,P400022300	3	67.6059	927.153	3623455490	2320490750	1274485250	3420412420	3811524860	3371316740	1985858690	4695709700	2715897340	2299378690	3335453180	2835196670	2958296830	3405255420	214631936	2999825660	3315137540	5093512200	4510852100	6159089200
AANEILGWSATTNLPEDLKER	P400022826	3	50.7376	776.736	5398100	11893400	19461800	4486630	12254500	9242740	9909270	7152960	2815670	9272720	22244290	10277040	12448200	9135560	6828630	6519290	10003400	8039280	7646040	9691760
FSEITGAGGR	P400022826,Q7X998,Q9XEJ6	2	24.9974	497.752	34815300	42213000	21581800	9900400	45021600	26524800	31700900	16361600	null	25771000	15630200	9976960	33857100	26876200	29671600	36648000	null	42703500	null	26461000
VTSDDFVFSGLAAPVK	P400023053	2	52.2635	826.934	70903000	107758000	66166000	60048300	92101640	58769200	55282500	109984000	48171900	60133600	99534600	89461600	92237104	145848000	111581000	85314200	111804656	128904000	98221800	189991040
AAVTPAFAPQFPGLNGLGISMAR Oxidation (M) @0.00000000000000000000100.0	P400023053,F2VPQ7,Q7XZV3	2	57.9053	1151.61	34161400	27999300	null	18560100	30946900	20748600	13671800	27149900	16655000	19116400	29267700	25566500	28663700	41931100	31212400	23863100	33200100	31227700	24293900	53455200
AAVTPAFAPQFPGLNGLGISMAR Oxidation (M) @0.00000000000000000000100.0	P400023053,F2VPQ7,Q7XZV3	3	57.8465	768.076	29670100	25073400	18818200	14751900	22792000	23071500	13248800	19237900	12912900	10640900	24654200	18216800	30790000	37071900	23498000	23784100	27140500	37693300	19370200	42342400
IAGGPLGEVVDPLYPGGSFDPLGLADDPEAFAELK	P400023743,P400023744,P400023742,P400023740,Q2XTE0,P400023745,P400023738,P07369,B8XLF1,Q41421,P400014555,P400014556,P400015466,P400064602,P400015464,P400014558,P400029202,P400015465,P400013055,Q41447,P400023739,P400023812,P400023813,P400023741	2	71.148	1763.89	null	null	103462000	151984448	null	null	99540496	238580992	159134000	156366000	18496100	55549300	110820600	13398700	67298400	null	null	null	343528000	153096992
MLGALGCVFPELLAR Oxidation (M) @0.100000000000000.0	P400023812,P400023813,P400023741,P400014554	2	60.946	831.943	6416110	2263310	4613520	4564070	5361500	4899640	6782660	10100900	5725160	4541920	9519860	4275820	7475940	7253760	4278990	1546510	null	3580920	6444640	6313430
LGALGCVFPELLAR	P400023812,P400023813,Q7M1L1,P400023741,P400014554	2	59.9987	758.425	65752500	61434300	49733700	63360400	136780992	113846000	100997000	162071008	164500000	110284000	193332000	174010000	108211368	176192000	130213000	68463904	252556336	417123936	455824000	514851008
AGAQVVGISGDDIESHK	P400023988	3	32.8235	561.618	11450000	16493800	8698650	5509040	9963620	14313100	7290120	11397600	14419400	15504400	10314300	10409200	12997600	16301900	22716700	19575800	28754800	40672800	31057500	42739100
LPFTLLCDEGNK	P400023988	2	49.1225	703.856	5877430	null	6269050	3547080	7379650	null	null	7524750	5419380	5429630	8550540	4767470	4927520	5433360	6405550	null	5750450	11386300	7205020	12217440
APESPSGYSCK	P400024701	2	19.6065	591.761	68443376	75112208	32055780	27011950	50417952	50470280	45198568	105369992	40546600	42718900	75604200	43495900	54789792	82670496	90130400	35823500	50098940	75128160	62032420	117549000
LVGATTFLDEATIK	P400024701	2	50.1407	739.913	187713760	198088992	98992096	105377000	112250000	113414000	105527000	251959008	97323904	95396600	226008992	174643008	134138352	284755456	262292000	138715008	152580992	222768992	168664000	314460000
LVGATTFLDEATIKK	P400024701	2	44.7843	803.96	18518728	18743900	10325700	3434810	3997840	8705890	9999420	28291870	8887860	11133400	13383410	9069260	10056700	17707600	33268270	11592200	17375000	21341800	17526100	36077200
LVGATTFLDEATIKK	P400024701	3	45.358	536.309	145995008	172390256	90130576	58057512	43073000	86348544	89527792	230760000	84394712	90931216	122299192	101621000	86936104	152188016	248687008	98898600	172672336	231143056	178508000	326401728
RPTTEESSF	P400025031,P400025033	2	23.8693	527.247	14904500	16263200	10239100	7187740	23301000	20942600	18388000	15892200	4540680	13442000	8601250	5679240	18389900	15161500	10565400	16574100	18305200	22371800	12242800	21936500
ALIKPLQQVLANSLR	P400025031,P400025033,Q9FZ47,P400050420,P400050419	3	52.8707	555.348	9186570	17121100	13034700	6827210	28633600	20113800	24308800	14491300	5240380	16558000	11610000	10685200	24925800	16210500	9550620	10014100	26233400	30346000	22452500	26302600
VPDSYFCPVCGAPK	P400025072	2	40.2419	798.866	7112240	23739400	17994900	9047620	19767900	15302100	16642600	21846100	17015200	23812900	20571600	11804400	19088800	20662100	30962600	9773830	42995800	58215300	44959000	43556500
EGAIVSASDISASMVAEAQK Oxidation (M) @0.00000000000001000000.0	P400025082	2	39.2262	990.487	92245696	69131000	79743104	36008700	66739100	50963100	46953200	67971000	31944900	59188600	57942900	18933500	86097000	60861400	71927400	62493300	45755100	68581200	53467700	60891100
IYGDTDDVNK	P400025082,Q9MUE2	2	22.6076	570.265	33516300	30721900	24670700	11417700	37738700	32645200	25350700	26975800	13295500	28007700	23110400	6007870	36278200	18581900	23505300	19852700	16616800	24813500	23129700	24812500
IYGDTDDVNKVQLDIR	P400025082,Q9MUE2	3	40.2988	621.989	17759400	38071700	38740700	24010900	41788800	41243800	24733100	36970900	22846700	39785700	33969600	13137600	48063200	32372600	52762700	45796600	55464900	75842096	61613200	49203900
KIYGDTDDVNK	P400025082,Q9MUE2	2	20.2145	634.312	3391940	2212240	1905920	913165	3511580	2858560	1828980	2627500	1284550	2571860	2092720	437357	2961770	1909960	1693500	2063490	1272840	2745050	1922390	2435840
KIYGDTDDVNK	P400025082,Q9MUE2	3	20.5393	423.211	4055460	3611630	2143440	1278665	4181880	3951130	2437660	3485700	1387030	2781440	2886035	805521	4357270	2809800	3393380	2858400	2189920	3583370	3017790	3405360
QAQEELFK	P400025082,Q9MUE2	2	28.0926	496.759	null	null	null	null	null	null	27613100	null	null	null	null	9048260	55063600	null	47889100	null	41744200	66372100	49884600	57620000
QLQAEEVGGGDKEVVR	P400025082,Q9MUE2	2	28.187	857.443	18498400	12807600	null	null	9643280	10297000	null	7061130	null	5313150	1778660	null	8360540	5305130	5810550	3929600	7845790	15351700	2444460	9069030
QLQAEEVGGGDKEVVR	P400025082,Q9MUE2	3	27.0232	571.965	110257792	109457288	6870320	22809184	76484128	68856880	33496588	54427720	21359614	41582848	25103400	15453000	47414160	41493640	40089800	29066000	62103440	118830000	34545800	74113904
ADGMIAHLASLAENR Oxidation (M) @0.000100000000000.0	P400025082,Q9MUE2,P400025081	3	39.998	528.933	18101100	18899000	26704500	8340830	11607900	25805400	11858000	17771800	14687900	28018500	24747900	7165680	29114700	15327100	26227600	18842400	39204400	53668000	42267800	48055200
AYLHAEADVER	P400025082,Q9MUE2,P400025081	3	25.5887	425.209	36990560	37728100	21688210	12761330	43429980	39247820	19747800	24964140	26205990	47837568	35394620	14281500	47130560	41473540	49337512	40580040	59036952	78610784	49405912	72971400
GLIATQFYFAK	P400025082,Q9MUE2,P400025081	2	50.5555	629.848	60022600	61150300	68861504	38427400	88476304	61644400	40870100	63539700	28591800	41591700	69252096	23935000	79249400	61999200	58991400	41345900	60964200	78037200	73033000	80571600
TFYYDLLK	P400025082,Q9MUE2,P400025081	2	48.9231	531.781	35372300	25518400	35722400	20369100	40952600	24813500	22853300	32744600	16508300	28350000	36445200	11712400	42355400	24494400	26122800	17173600	28183800	38195600	30036300	32798500
LIDILYPTAQTIDK	P400025319	2	51.3785	802.454	2085180	4412140	9367850	869357	8470260	3406960	6114630	5300040	1986840	5419760	5745350	2117890	6731900	4289640	4756240	1990860	4400730	6681460	3561970	4297320
LGAAGIFIPELLTK	P400025334	2	60.6707	721.938	9980630	8389090	6395330	8950840	9562570	11368300	12019000	18221500	16828000	14773100	28694900	22730900	14634300	27746300	null	10222900	28581300	46232400	54545700	59615100
LFDNVEKLEDAVK	P400025362	3	46.072	507.274	25302600	26219200	14530600	13048900	12709700	28762300	15030900	34557200	12833500	14426100	21403700	14968600	25150300	22711500	39414100	15887700	30320100	50531300	44808100	59848400
LGHNFVGTEQILLGLIGEGTGIAAK	P400025512,P31542,P31541,P400025093,P400025510,Q9FI56,O48931,F4JF64,Q9M2Z6,Q9SXJ7,Q93ZM4	3	67.0505	836.803	2888940	3699700	7245870	1683850	6820120	2186380	2960570	2629610	null	10280300	2409760	2566390	2045500	null	2308900	5337110	13023300	11769800	10261300	3334360
EIELQVTER	P400025512,P31542,P31541,P400036498,P400025093,F4JF64,Q9FI56,Q9M2Z6,Q9SXJ7,P400025511,O48931,Q56ZN9,P400025092	2	34.7674	558.798	23453480	18093180	17951880	5435680	13560490	18856640	14239960	15950990	11935610	22717110	13490120	3924332	19217540	12827500	12140980	23621500	13165820	16416900	15561960	17535230
MVGESNEAVGASVGGGTSGQK Oxidation (M) @0.100000000000000000000.0	P400025512,P31542,P400025511	2	25.4562	969.45	21247400	18396700	19409300	7624490	22350900	15328100	17074900	9666430	4363800	15690800	11261400	5127190	18496100	14642900	14864100	17832000	14229700	14531400	10991400	10808300
AESEAADTGPLVTEADIQHIVSSWTGIPVEK	P400025512,P31542,P400025511,Q6ST30	3	71.3055	1084.21	null	null	null	null	null	null	null	null	null	1404940	null	null	null	null	null	null	null	null	2597020	null
NNPCLIGEPGVGK	P400025512,P31542,Q9FI56,O48931,F4JF64,Q9M2Z6,Q9SXJ7,P400025093,Q93ZM4,P400025511,P31541,P400036498	2	33.6304	677.845	9965430	15747900	14259100	3207400	16088900	17619400	10735300	9552330	2467530	12848500	7005580	3024490	14526400	8826020	7811300	8310630	14297500	13161600	7436150	11964800
GSGFVAVEIPFTPR	P400025512,P31542,Q9FI56,O48931,F4JF64,Q9M2Z6,Q9SXJ7,Q93ZM4,P400025510	2	53.6401	738.899	15190400	23730100	37446500	12694000	32530900	22528200	22822500	14414300	7247630	27380400	22999400	13078900	21986600	22009600	13474800	19100800	29769500	30924600	24944500	19833400
LDMSEFMER 2 Oxidation (M) @0.001000100.0	P400025512,P31542,Q9FI56,O48931,P400025093,F4JF64,Q9M2Z6,Q9SXJ7,P400025511,P31541,P400036498,Q6ST30,P400025092	2	29.083	595.249	24640600	31635900	27369600	9616870	43311900	34089600	20875700	19163800	5079870	25593300	14229900	7363090	29328000	19622800	19998400	25374700	25929600	26905000	13619300	23661500
VLENLGADPSNIR	P400025512,P31542,Q9FI56,O48931,P400025093,P400025510,F4JF64,Q9M2Z6,Q9SXJ7,Q93ZM4	2	36.7518	699.376	62422800	64040100	51767000	19531400	52975000	59643300	45013600	36187300	13107300	50463300	36422500	16126700	57326000	38834800	42815700	58880100	60713600	68555400	47976900	41745900
VPEPTVDETIQILK	P400025512,P31542,Q9FI56,O48931,P400025511	2	49.3011	791.444	29396300	38439700	55488800	14562300	56622700	37217900	32967200	23178400	8520450	34606000	31081900	16034200	45146900	27203700	18172000	19633100	37969800	31662600	28095000	35425400
LAEEGKLDPVVGR	P400025512,P31542,Q9FI56,O48931,P400025511,P400025093,P400036498,F4JF64,Q9M2Z6,Q9SXJ7,Q93ZM4,P31541	3	31.4068	461.595	38154100	54101400	29933400	12463500	69706496	32303800	28065400	18959100	9289660	33982400	19557000	11997200	41939300	23663100	34074600	45322000	52879500	50367300	36704800	51087400
MPTLEEYGTNLTK Oxidation (M) @0.1000000000000.0	P400025512,P31542,Q9FI56,O48931,P400025511,P400025093,P400036498,F4JF64,Q9M2Z6,Q9SXJ7,Q93ZM4,P31541	2	39.417	756.869	38690000	38818700	54591100	14106700	38888200	26415100	28770400	24353020	7839390	30772000	18932000	11659100	37997500	26686500	24585300	33792000	29495800	28779700	24837000	26465900
QYFRPEFLNR	P400025512,P31542,Q9FI56,O48931,P400025511,P400025093,P400036498,P400025092,Q56ZN9,F4JF64,Q9M2Z6,Q9SXJ7,P31541	3	40.4975	457.241	11558800	25308600	34528000	10130800	27858700	20649100	21824800	15457200	5478230	23876600	17065900	7912860	26481200	6196240	11387700	14873000	18346400	20249800	18553700	9605030
IIGQDEAVK	P400025512,P31542,Q9FI56,O48931,P400025511,Q6ST30	2	24.1698	486.773	50766700	58107000	39430800	16975400	78119696	65563500	43550500	35429400	11948900	51876900	24450800	13650800	53132600	36609800	36059700	48898100	56171800	60345600	43362000	60184400
LIGSPPGYVGYTEGGQLTEAVR	P400025512,P31542,Q9FI56,P400025511,P400025093,P400036498,P400025092,F4JF64,Q9M2Z6,Q9SXJ7,P31541	2	47.122	1132.59	23588300	31748600	58539400	13252300	30169800	32503400	20533200	12794300	7518300	30097000	26292400	15580100	31487500	20200400	18480300	15782500	28672400	27470800	20098600	23657800
YTDEALVAAAQLSYQYISDR	P400025512,P400025511	2	63.2923	1139.06	6828080	6851340	13515300	null	9115960	4158890	3474130	3984960	1795410	8774420	2495560	1628940	5261760	null	2173210	3337120	4932120	5527470	4706770	4632630
YTDEALVAAAQLSYQYISDR	P400025512,P400025511	3	63.1807	759.71	5328870	8018280	11646300	5919540	8820910	5098770	4075470	4539900	1612440	6233500	2570000	2012750	8158520	null	null	4936600	4766540	6517150	4947490	5003930
LLEDSMAEK Oxidation (M) @0.000001000.0	P400025512,P400025511,P31542,P31541,P400025093,P400036498,Q56ZN9,P400025092,Q9FI56,O48931,F4JF64,Q9M2Z6,Q9SXJ7	2	21.367	526.253	35547600	49411300	28561200	11343500	53722000	41789500	28538100	27194600	8575050	27370800	16417500	9404970	39758600	25727200	26977900	32793000	33117700	38238100	28686200	37541900
AANQVAGEILSFFTR	P400025599	2	67.7357	812.432	11962500	11415600	10490400	12079700	15035700	8304900	11648500	11444500	11757000	14355400	16995000	11799400	6338350	8322900	16474400	8360110	7394660	12812200	20165600	15566600
AANQVAGEILSFFTR	P400025599	3	67.7354	541.957	3302230	4071460	4596330	8582700	8665210	4723630	5285480	5531760	3700130	6344920	7220850	5502790	3275130	3311730	6578550	4176400	2919490	5817930	8322860	4267000
LNNLGPQPGATK	P400025619	2	24.5824	605.335	36780800	25113300	23261900	10202300	41769100	34310800	28966700	33211200	13778800	29989400	18204000	9661600	32387000	24676600	29070700	30142600	30733200	45956200	29500000	44916600
KLVAEIK	P400025903,P400054746	2	21.5008	400.767	8938520	5285270	1065980	4998400	5711880	5872490	3339650	9083800	5853860	3349670	3752750	2850470	5518660	8856830	9056560	8188490	5565700	12036000	8552820	19321200
ISLSPVQQSLGPLENAVAGIAR	P400026043	2	63.6908	1110.63	31026000	24189000	14779700	11433800	20865900	15665710	14238400	34981400	16293800	23397800	26390400	21662200	13037200	28950600	24315200	13705080	21137300	18883400	22120100	23334800
SNIDLPETVDLFGQK	P400026043	2	53.6206	838.435	33827200	35394700	28415300	33896700	25235900	32313100	33523000	36734800	31833300	30047900	47197200	39522500	30449100	53816800	37142000	28305500	35003300	51852800	42316800	38621900
GDGGLFVLVK	P400026043,PGSC0003DMP400006190	2	48.488	502.795	26931600	25762400	17957900	16455400	24877900	22950200	21723700	27987100	19583500	18614500	21687200	23926600	33435900	33877300	30734500	17107900	21851800	35273500	28471100	25825600
GNPNSDAIDVVADVK	P400026059,P400026061,P400026062	2	40.6087	757.382	26634000	34714180	23795200	22499320	30052370	38650800	34094120	41303800	23214580	23946300	37206152	22969850	42934660	32021120	47595620	37102540	33536390	44384900	36993392	42267112
ATESFTKPLK	P400026060,P400026061	2	25.1032	561.315	28047500	22057400	5016590	8441740	13955100	19936400	15585400	25045500	12784300	12297600	14274100	10081900	17970000	23198100	23643900	21983100	15696100	27713200	20883000	29516400
INGEANVVAVNAAK	P400026060,P400026061,P400026062	2	29.8832	685.378	42269800	42343100	10826400	18418300	28686200	41113000	26161300	44809000	20218600	18606500	25887000	20122400	33580500	42796000	44807400	34893700	27762000	46700200	32816600	58823500
AAVSEGIEVISLSR	P400026061,P400026062,P400026059	2	46.0814	715.899	42907400	33736100	21333800	19626500	16450400	33408700	33651100	51365800	23930700	20368700	34141500	26403700	43488800	32007200	49065000	23013100	34535600	47153800	43560500	57056300
IVVIGGSGFVGSAICK	P400026061,P400026062,P400026059	2	47.2826	782.435	13486500	12797700	7074400	6559490	10166800	19040700	12974100	17230400	11441700	8182650	18806400	12916900	23152000	21693100	23663100	7535910	14400800	30068900	15209600	30567200
TGKNGNIR	P400026173,Q948Z3	2	41.6689	430.241	133686000	117472000	62509700	6336410	20525700	106265000	70086600	134599008	38222200	46611000	8458230	21849900	143056992	66894800	57905000	34692500	122591000	250632992	222370000	247688000
GLTSAPGRPR	P400026401,P400026402	2	18.668	506.288	7539330	5484540	null	1260640	8574300	11089900	6301000	9482500	3236380	4030660	3286270	393217	7134010	4132270	6206210	7469590	6117360	11218700	8568930	12701900
VGADQVVK	P400026401,P400026402	2	20.1109	408.235	23587100	17349600	6577120	5963550	23934600	28864800	17291100	28120800	11785900	9941520	11864900	1674550	22541600	10902800	18296400	15550500	14579500	29274000	24151700	30985700
GLDEGILSMK Oxidation (M) @0.0000000010.0	P400026401,P400026402,O22870	2	37.0114	539.778	null	23545300	11829200	12177300	26836200	35857900	25771600	31067200	15472800	15617900	25585200	2547180	24123500	16525000	23383400	28808200	22783500	35234500	29009700	28877500
IYVGNIPWDIDDAR	P400026589,P19682	2	53.8494	823.916	4245410	7941760	18945900	3419510	10505300	6269600	12537300	4312000	3258870	9679430	4158070	4799430	9100610	5442330	3273430	4261620	8205190	8690530	6502080	2790510
GFGFVTMSTVEEAEK Oxidation (M) @0.000000100000000.0	P400026589,Q9FGS0,P19683	2	43.6936	824.385	29425100	24604150	41992200	7963540	32415100	31367500	33344200	26934900	5012000	17490200	11148360	9814720	37503000	11711700	21507080	16780950	25679900	29371400	14169270	22060110
LIDQALGNGVK	P400026606	2	32.9323	564.327	13407400	14489200	9599430	2151300	14796100	18127500	13647000	9441520	1980830	10892500	3525220	3095140	15821900	11309800	9814160	14139800	19158800	19677700	11348000	19106700
QSAAIRAIR	P400026692	2	34.6391	493.295	809056640	795731520	202319360	145045968	494311008	1139680000	604348030	503666624	200330784	645072450	187169376	202673472	719655490	829533180	831600320	1144535420	1681580030	1265880060	938196540	1434766720
GFVSEAESGKR	P400026922,Q9LL36,P400026921	2	23.8711	583.795	6304480	4194170	4646810	2034290	11657500	9505400	null	null	null	7338200	3588290	null	8540420	4345550	7038420	7102110	6807630	7832510	6937000	9645070
KDTVIGAVPK	P400026927	2	25.3902	514.312	8946690	6711540	3205610	2229130	7171500	7359560	6468640	5343780	2193980	5007160	4978930	2177800	7210420	9507580	9768780	11646300	10443900	13123500	12548300	11086700
LPVLVEFWAPWCGPCR	P400026927	2	70.9438	993.99	null	null	null	null	null	null	null	null	null	null	null	null	null	null	null	null	null	null	null	null
VNTDESPGIATR	P400026927	2	24.2027	630.317	43340000	34725000	14749400	13037300	51056100	51988000	30152300	38060600	12709100	22983600	22669800	11747700	34030100	45760300	50583400	50444700	51466300	70803200	59683108	105720720
INQPEAGAGGGQAAQK	P400027216	2	18.3923	748.876	2311401	1480220	1218050	960332	2667760	2223270	815155	1699210	547388	1516700	1802970	532657	1636910	1713151	2035020	2157560	2215560	2748690	2070870	2244610
EGNIITQIK	P400027398	2	34.3976	508.295	37484300	19479300	16419700	5546760	16549500	20191300	19004400	19261100	9005110	18523300	12506400	6938650	23236800	19358100	15078200	25905700	24355500	33375300	20823900	29722800
LQSVDGFEVTQK	P400027398	2	36.8102	675.851	34269700	19822500	19357000	7274560	18591100	19816200	19354100	18636100	10852200	19572400	20853300	7173290	23110900	19902900	19399800	23305000	18906600	32262400	16627800	18120600
QLGSIGAGTTPGR	P400027398,O80360	2	28.7015	607.83	23338100	17467600	15087700	5593630	28388900	20970400	16138600	23206800	8622880	18746300	13755100	8239070	21747600	18291700	21638500	19990400	22198700	37391100	13561000	22618900
EGDLVDVAGTTIGK	P400027398,Q0WWY5,Q9SKX4	2	40.7592	687.866	18250880	13872560	22848900	7392360	22887070	20706780	20108840	21696950	1332510	15156210	20710890	3689380	23429300	9222890	19330000	22340390	22499200	37207700	33886100	40052500
SYNSYGAYGQSK	P400027707	2	26.4555	662.796	null	4818900	null	4509420	5559390	3682200	null	3370270	2320630	6750980	6647080	2767280	null	6016700	5226790	4812920	null	6567210	null	8166480
IVNVSSEAHR	P400027707,F4JNJ2,Q8H0Y3,Q8H1Q6	2	21.0023	556.297	2095230	2656940	721871	678213	2779470	2535140	1621130	2207240	1024750	2278820	1665210	747650	2591670	2888280	3671560	3222380	2399750	4808090	3183440	6453250
LVFVTNNSTK	P400028271,P400034302,Q8L3U4,Q8GY27,Q9LHT3,Q9LTH1,F4K4H2	2	32.6016	561.813	23599000	27786500	14064400	4396270	25128500	35130800	25007500	21204200	5500040	17846000	5456990	5701340	34947700	22147200	14750600	26421500	31442600	29715400	15659400	24200100
DDAAVQDEAPIEDSR	P400028311,P400028314	2	30.7238	815.866	null	1790790	1802720	895173	null	2440430	1581570	1628910	839876	1348030	3010380	819809	2023410	1240770	2099170	1396630	null	1516100	null	1729680
DDGAVQNEAPIEDSSK	P400028311,P400028314	2	27.8395	837.879	1680540	1831460	2029790	1163520	2324240	2719720	2234780	2156800	996374	2002160	2045560	796814	2504240	2427720	1637960	862824	709074	1744960	763373	null
DDGVVQDEAPIEDTR	P400028311,P400028314	2	36.477	829.881	null	null	1466040	null	null	null	null	1031190	null	732078	2151120	null	null	null	null	null	null	null	null	null
FFDTLNIK	P400028311,P400028314	2	43.3063	499.274	226069600	167145696	112106096	97482600	78801480	182778304	123596256	191197600	104591296	113578592	141849504	74179800	148668800	93618496	153875360	84404864	101061104	165102400	97481808	148458496
NDKETDAYAALK	P400028311,P400028314	2	27.0118	669.832	21105200	20366500	7149240	7130160	18401900	21234800	12701800	17541500	8289300	14483400	9944630	5367930	15248000	16987000	13086300	12248100	11640200	21368700	15204500	16698500
NDKETDAYAALK	P400028311,P400028314	3	27.0556	446.891	36851100	36197900	12916500	13041600	27621600	33047000	19853700	25113200	13923500	18129300	18057800	11391600	26970400	27203500	21599300	16480200	20370500	37061100	null	22591300
FALLETSSVDDDLASLKK	P400028349,P400028350	3	51.0908	651.35	13432500	19679000	18866300	14449300	29623870	22623400	17163100	17447900	6941880	14348300	16793800	13030300	28174000	21770700	20696000	15254500	17212500	null	18578900	25182000
SYADNANALK	P400028349,P400028350	2	24.9968	533.762	18630900	14618600	11849680	7838740	13132500	13589400	10192700	13040700	7847780	11736800	13740268	8284010	15697100	17605400	19971100	17592700	11830800	18453500	13509200	17452650
SYANALISTFEDPEK	P400028349,P400028350	2	53.3781	842.911	9240760	14812600	16608800	10932200	10170200	12769000	13111800	10034400	null	13582600	24688400	9581340	17741400	13332400	8232030	7978360	15295300	15204300	19477200	18974200
YVPLFGEFFYETSK	P400028467	2	64.3783	863.926	null	1795130	3713470	null	4139530	null	4487480	4926640	null	4285320	null	1354550	1630640	5018950	null	null	5140920	3881460	null	null
LISALIMPR Oxidation (M) @0.000000100.0	P400028658,Q8GZV0,Q673E9,Q8GVD5,D9J0A9	2	35.6423	515.308	370099008	401470016	88029000	161072992	102652000	269876992	245230000	416478016	200739008	186552000	219492000	196171008	284400000	315296992	385791008	317056000	258100000	301033984	321347008	419315008
GGAIDDSVVTK	P400028766,P54260	2	26.4733	531.278	73701504	75322704	40350300	14286200	65005800	52683300	32660300	52854000	22846900	28094300	19266900	6759430	41137600	37335900	36730900	34764400	47496700	56403200	39817500	50733400
LVIADVAGLAPGTGSLTVFTNEK	P400028766,P54260	2	59.1674	1137.13	42830400	36045800	38847300	14591400	35185500	20517200	15187100	18792800	17703400	22499600	10948500	7489840	16510300	25417100	15052400	13793300	35685400	37934700	29496800	25686100
MYFGEFR Oxidation (M) @0.1000000.0	P400028766,P54260	2	37.8659	483.215	45716700	41506600	41247800	11872700	27730800	24990100	18031100	32074600	11071900	16151800	13900810	4326170	24954600	24105400	14249800	23231600	19361600	25975700	13965600	20393700
SHSEIQDSNGQNIGEITSGGFSPCLK	P400028766,P54260	3	45.4207	921.43	null	null	5402570	null	null	null	null	null	2578970	2760210	2940830	null	null	null	null	null	null	null	null	null
SLLALQGPLAAPVLQYLTK	P400028766,P54260	3	68.2308	666.069	6875450	13489600	11092600	16512800	18960700	7659580	4171930	21593300	2879950	9435260	5962320	5542710	3426130	6141390	2454610	8928340	11064900	10539300	11009000	5196140
TGYTGEDGFEISVPSENALDLAK	P400028766,P54260	2	54.0289	1207.08	28346800	30647700	31992700	16658800	24769400	18702100	18387800	20847800	16199400	21445800	11541000	7071450	17073400	27235900	14657400	17908600	26896100	30024400	18343600	20053100
VLDINGAPCFLTR	P400028766,P54260	2	49.1315	738.39	49012400	47723900	46636900	17056800	57721300	36148900	26726100	48195500	25251300	27975500	30764700	10243000	45527700	39290000	26224600	14967100	43244600	53430400	39653700	51559100
DSIMDSTVNCR Oxidation (M) @0.00010000000.0	P400028766,P54260,O65396	2	23.2452	657.278	23562460	20107190	16337120	8627750	23258100	18051360	11630960	19978230	8842680	9931960	8163160	2211970	15551720	12442620	10733990	7594250	10347380	15219720	8248680	12221880
FLEGSSLPTAK	P400028825	2	35.5101	575.314	2179249920	2303119870	864774020	931345020	827372990	1854680060	1422659970	1845580030	949486980	1368620030	1483840000	908627010	1913709950	1767100030	2070690050	1694050050	1621861120	1646329980	2074550020	2179840000
GEICDINGNCVDAAEDEFFR	P400028825	2	52.1659	1165.99	242699008	273260992	203527008	240447008	256336992	208144992	152888000	218943008	162018000	228959008	222990000	198308992	225700000	252086000	212815008	58980200	223280992	341849984	254998000	342756992
GEICDINGNCVDAAEDEFFR	P400028825	3	52.1898	777.664	42263100	63348900	32622400	36781700	61662700	53341400	24974700	34600200	25502200	24528000	28615600	null	69467400	46789300	35607400	15253300	43878700	91022496	52592300	73637504
GLCGGFNNYIIK	P400028825	2	45.4546	678.346	688003010	713252990	538024000	382737984	335657984	772368000	502831008	818089980	452155008	647998980	785985020	404804992	521920000	525812992	740601980	215612000	727187970	1140950020	914793980	1092419970
MSAMSSATDNASELKK	P400028825	3	33.3024	557.595	null	null	null	null	null	null	null	null	null	null	null	null	null	null	null	null	null	null	null	null
MSAMSSATDNASELKK 2 Oxidation (M) @0.1001000000000000.0	P400028825	2	19.5748	851.886	24213900	24631700	3445690	4496370	19719460	22958600	13690550	19226050	7536460	11260430	6558020	2797510	17358680	15368980	20969600	17710550	12546590	22137500	15411800	22434400
MSAMSSATDNASELKK 2 Oxidation (M) @0.1001000000000000.0	P400028825	3	18.399	568.259	471146720	446178496	145757760	191075168	363810816	442191584	242949712	330942720	152840784	208654208	218038960	115239608	321678688	302113600	367450688	280887040	248682368	397466688	262947856	356430112
MSAMSSATDNASELKK Oxidation (M) @0.0001000000000000.0	P400028825	3	25.6384	562.928	null	453234	221916	null	null	249576	null	280363	null	361006	442457	null	null	null	null	null	null	1823550	529905	1218440
RPYIPVDKFLEGSSLPTAK	P400028825	3	46.5792	706.728	174427056	136725632	61827400	110570000	112751000	241176992	66879600	186136000	93817296	112540000	165668000	137952992	141818656	306431904	283678016	170992000	289257984	362125184	271793984	473504992
RPYIPVDKFLEGSSLPTAK	P400028825	4	46.6805	530.298	117198000	126263000	38111200	69679800	76844000	164726000	39562000	112858000	62587000	58779600	81900096	73077400	93045000	177343008	162955008	92354200	198523008	303366016	214348000	332928992
ALGIDYTIISVGK	P400028825,P29790	2	50.947	675.391	681529470	830209020	553064000	523842336	797568320	691011200	543425340	695708030	468832512	538832380	917710210	555888000	744573700	905852740	930291970	477613824	628205760	832213380	858198020	1010475900
ALGIDYTIISVGKK	P400028825,P29790	2	46.2235	739.438	76396496	51573800	32688300	33819400	26563500	66846700	29988200	64197200	33991800	41250300	63682900	45340200	51054200	58133500	74525200	42532600	65938500	107444000	74360200	108801000
ALGIDYTIISVGKK	P400028825,P29790	3	46.0866	493.294	197767856	155485456	88637200	93498160	73645560	182196000	80479824	155653296	84923904	100803072	145355088	102026848	136343664	140294192	194460512	110184288	178775424	286280192	214243632	301966016
VALVVVTGDR	P400028825,P29790,Q01908,Q9SUI9	2	36.3548	514.811	2224359940	null	630721980	679329020	878953980	991688000	1098140030	1630450050	830500990	1266140030	1264550020	657544000	1625229950	1568240000	1815340030	1282259970	1518339970	1678759940	1872579970	2356499970
SEPVIHTLLPLSPK	P400028825,P29790,Q01908,Q9SUI9,B9DI66	2	46.3257	765.952	276233984	260240992	240619008	130738000	127599000	317199008	190015008	311436000	223572000	349876000	521296000	285164992	325275008	265524000	382996992	196764992	445206016	639569020	531494016	763910980
ALQESLASELASR	P400028825,Q01909	2	42.6031	687.868	3428359940	2699320060	1336070020	1424749950	1480930050	2122969980	1802439940	2702000130	1387289980	1903750020	2250609920	1244729980	1876950020	1816930050	1896800000	1712259970	2161659900	3182840060	2617039870	3580610050
ALQESLASELASR	P400028825,Q01909	3	41.0714	458.915	102907000	136196992	35417000	null	896894	19738400	50481800	67654800	24483700	45177200	34100100	3790310	72941504	45697800	29775900	4215330	89135104	241526000	167019008	215348992
SEPVIHTLLPLSPK	P400028825,Q9SUI9,B9DI66,P29790,Q01908	3	46.325	510.97	696748030	696270980	582819970	368118016	338796992	766456000	442907008	677875010	547662980	736273980	1080950020	656939010	794940990	659777980	885878020	479400992	1103200000	1772989950	1483779970	1866460030
KVALVVVTGDR	P400028825,Q9SUI9,P29790,Q01908	2	31.3307	578.858	57161300	58861000	10541700	12348500	44473800	34205600	28143600	29290200	20757300	30392900	21345600	11827300	42139500	32122000	55134000	48796300	44624500	78036496	55136900	86520704
RPYIPVDK	P400028825,Q9SUI9,P29790,Q01908	2	25.0946	494.286	1380870020	1227500030	480895008	579286980	780361020	930694980	704774020	1086339970	619694980	796187010	865195010	495936992	1007219970	1002449980	1117859970	1056360000	681201980	1149830020	1179859970	1138940030
KGNSYFLR	P400028825,Q9SUI9,Q01908	2	27.2995	492.768	730003010	632790980	178602000	303019008	554033980	643286020	390154016	559179010	327144000	434204992	340091008	274272992	518572992	553035010	401366016	361092992	407870016	311528000	420718912	601950980
AGYTNWAALILK	P400028846	2	58.9186	660.872	3763660	2510230	4417820	1687380	3512310	null	null	1951090	1475190	3207060	4240260	2225440	null	3140830	null	2376730	3164670	5922500	7394880	7007810
ATSESSESLSSPSVVK	P400028919,P400028920,P400028921	2	36.2069	797.895	1431204740	1019547140	702343100	567099010	744659900	949488830	751028100	1270904960	599750850	785794500	997969280	571122880	936317120	864503810	1388693500	706926270	1035771900	1501700100	1235573630	1556196990
VADYGLAR	P400029128,P400029129,P400047976	2	28.7136	432.729	46692100	78841504	36411080	9471290	47496032	24271410	37427500	35725400	14735050	36852000	16857170	11571532	45091200	37773900	29083650	26388060	32018900	82387504	21224050	41200448
GVEPQTSDAEPK	P400029178,P400029179,P400029180,P400029182	2	20.9983	629.302	16046100	14066400	6459430	6485270	13881700	12340800	8857810	13169300	8247360	8401360	9367980	5809450	11006900	11171600	11887200	9684300	10675900	17235400	13088400	16658700
TILSNAPAGNR	P400029178,P400029179,P400029180,P400029182	2	26.2973	557.306	24829700	24620700	8512360	9182300	22635400	22241300	11730800	15329800	11919100	12863200	12265800	8146420	18528400	17843000	18575500	18493400	16755700	23009000	20541000	24111400
ELVDEMVSSTGIQPHVANFLNILVDMK Oxidation (M) @0.000001000000000000000000000.0	P400029632	3	69.3994	1005.84	null	null	null	null	null	null	null	null	null	null	null	null	null	null	null	null	null	null	null	null
IELIKDIVK	P400029632	2	40.7968	535.847	230240000	218559008	158938000	131120000	175304992	306335008	163560624	220941632	128295000	185372992	182480000	129899000	227444992	169186000	349811008	284575008	182115008	298212352	257374000	347043104
IFDDDAVYDFFVSPIVSEEK	P400029632	2	69.006	1168.06	657516740	530291744	384700448	325068768	421475136	371114080	385071808	491381440	349369792	489920608	391269184	305934656	358237568	652031680	509509792	399021792	558691650	611012740	579547580	531967168
IFDDDAVYDFFVSPIVSEEK	P400029632	3	68.091	779.043	90790600	178342688	52689552	261164512	82886472	116568728	68459672	224890064	67921136	137686016	100416928	146366912	42216448	92817376	65439040	135866016	133836000	163964384	174236208	108444120
SNETLEQTTADLEK	P400029632	2	36.7328	789.882	1197840000	919729980	416240000	392391008	567747970	826260990	625526020	809564030	468583008	616121980	976243010	387048992	764294980	852377020	896441020	768556030	639187970	967401980	834969020	804236030
SNETLEQTTADLEKIEK	P400029632	2	44.086	974.994	86859504	43651900	19024400	20257200	30002000	65044800	22706900	71962304	22809300	31331300	35274100	23835400	40192500	53030700	114121000	47016000	84095696	122691000	74752896	135882000
SNETLEQTTADLEKIEK	P400029632	3	44.3734	650.332	391575008	237307008	105786000	167476992	190228000	330751008	117652000	342008000	147100000	177010000	215091008	157432992	184756000	283599008	497831008	222616000	421724992	623643010	408711008	663480000
VYNTATDTELAVVTSVVK	P400029632	2	52.7603	955.514	154868000	168058000	89416944	103077000	141668992	135376992	105959000	137495008	87478800	122258336	193175664	101768000	149920000	155247008	135771008	92908304	136988992	209226000	179706000	221194000
VYNTATDTELAVVTSVVK	P400029632	3	52.7771	637.345	31962000	37725100	16322300	19743200	40209100	31574800	20993900	26224500	16100500	15885400	31099300	15477500	38557800	28776400	25762000	23326800	26505400	50728400	36759500	44515000
KQLEDIAAQLEIGDIQLAV	P400029632,P32980	2	62.9586	1034.07	16032900	10464500	6866390	null	4679530	833689	null	4645050	3377830	6067380	1433120	null	3286610	8891110	null	6815650	9205530	10468900	null	null
LESQHLAQIAK	P400029632,P32980	2	26.2854	619.35	35965400	40933700	9162520	8876970	36972400	39153400	20277000	24818300	25805200	39187000	23489900	13514900	38139000	37635400	47938900	38269100	62998300	92922496	71220304	66268800
LESQHLAQIAK	P400029632,P32980	3	26.2853	413.236	108320000	154012000	48496800	44311300	115838000	131234000	62232900	68687104	86068304	124058000	105686000	62457100	128877000	114814000	150716000	103887000	197338000	308032000	208566000	210130000
TVIDESLVAGFTIR	P400029632,P32980	2	55.2341	760.923	333625984	194926000	98893504	117355000	130233000	129709000	106762000	169247008	128217000	144666000	163259008	null	154979008	246863008	105588000	126528000	192094000	309515008	275720000	251664992
LIDMSVK	P400029632,Q8RY87,Q9SSS9,P32980	2	32.9757	403.23	4199440	7957300	2137740	null	2200360	null	null	2724540	1948330	6149360	3548670	1238650	null	null	null	null	5470890	10070900	3252050	4541280
LIDMSVK Oxidation (M) @0.0001000.0	P400029632,Q8RY87,Q9SSS9,P32980	2	21.3951	411.226	301302016	169143008	55848700	91939904	214480704	199960000	206611008	231200992	73855600	143711392	148778304	70500496	null	135184000	292149984	118896000	143666496	227024992	225950304	291192992
LIDMSVKK	P400029632,Q8RY87,Q9SSS9,P32980	2	31.9303	467.276	null	null	null	null	null	null	null	null	null	null	null	null	null	null	null	null	null	null	null	null
LSSSGLLR	P400029941,P400029942,B1Q3F8	2	31.0069	416.749	145041904	154492608	451360672	28286370	79823128	53619912	58356680	47648400	45544432	84738496	71124432	36105280	57741300	61552840	99354696	97551104	174921504	152075808	76460896	215706096
AILSEFVEIPAENRVPAAVPTPAAV	P400030249	2	59.1315	1281.21	98522704	74439200	51314900	52025100	93795600	74627000	49842800	66646700	56853700	55646000	58595000	66337700	56060600	88377800	79604400	49004900	74219296	115370000	102132000	110137000
AILSEFVEIPAENRVPAAVPTPAAV	P400030249	3	59.1312	854.475	150290000	111795000	93159200	83780600	184946000	147731008	100075000	110513000	94546200	76569504	96507504	113410000	131909000	141035008	133876000	108462000	133410000	218380992	170960992	174839008
LAEDIDVAVK	P400030249	2	35.4803	536.8	254180992	195319008	88756200	79563504	98782096	236300000	162075008	242603008	122312000	153279008	141531008	95513800	217768992	227799008	257928000	217664000	176659008	181015008	231436000	272136000
LAEDIDVAVKK	P400030249	2	30.3244	600.848	55337800	36789200	10947200	13109400	29346400	48625700	24443100	47430400	20603400	24971500	22935100	12723100	30638100	31771700	45978600	44546600	27041900	52983100	38911500	59526800
LAEDIDVAVKK	P400030249	3	30.3251	400.901	226114000	160279008	44731900	49823800	102720000	188427008	91850496	153835008	73638800	89583504	76320704	56894000	120547000	112245000	190027008	164838000	115648000	229812000	159278000	246596000
SNGGMGGPGGPGNPLAFGQSK Oxidation (M) @0.000010000000000000000.0	P400030249	2	37.29	951.946	123206928	84127400	49410200	48581300	77940400	89140400	58180300	87265400	40772600	53467000	50673000	38141900	63967800	78912800	94916400	76647296	50425200	87728600	61896800	93711200
VDLFENGTIAIVEAVSPELGNR	P400030249	2	67.1556	1172.12	67355104	37807800	48533800	19792000	33518100	27956700	28194600	32511600	25932700	33129200	23254400	25257400	25279000	44883600	31541700	21925800	37377800	62271100	64135200	37251900
VDLFENGTIAIVEAVSPELGNR	P400030249	3	67.1627	781.748	29260600	35020800	22467900	44123200	40247200	26276500	15777100	26083000	12902300	29097500	17588600	23387300	12771700	27162900	15336100	18989300	25058800	50789500	49678800	19630300
TPGFSGADLANLLNEAAILAGR	P400030249,B9DHR0,O80860,Q8W585,B9DHT7,Q9ZP50	2	71.436	1086.08	192570000	161138000	116459296	93958672	151503008	130349000	87922192	168630000	94018096	146799392	53519880	53854200	76634976	194055904	64633500	null	154156992	175275008	211241904	72128536
ENAPCIVFVDEIDAVGR	P400030249,Q8W585,Q9ZP50,B9DHR0,O80860,B9DHT7	2	58.4549	952.469	106237000	80556200	74375800	74469000	116000000	82862704	72511600	78668600	81560896	87718400	126094000	86157904	109624000	115385000	79632304	37778700	91182096	146344000	118339000	137654000
FQMEPNTGVTFDDVAGVDEAKQDFMEVVEFLK 2 Oxidation (M) @0.00100000000000000000000010000000.0	P400030249,Q8W585,Q9ZP50,B9DHR0,O80860,B9DHT7	3	69.1833	1223.24	40883500	41874900	12826600	9329900	20619800	9829700	null	20480400	11510400	14726900	null	null	2187200	26400100	2357220	18321700	20481000	31598000	26215900	3821150
IVAGMEGTVMTDGK 2 Oxidation (M) @0.00001000010000.0	P400030249,Q8W585,Q9ZP50,B9DHR0,O80860,B9DHT7	2	21.9913	720.841	485855904	431568480	162270112	236528384	400656096	481464992	297342688	399595104	166492800	219243008	224209600	129477008	355151712	321577920	392829024	275470112	199351504	349247584	279414016	359043776
AAEEVIFGEPEVTTGAAGDLQQITGLAK	P400030249,Q9ZP50	2	58.853	1408.23	73940400	55688500	50617400	42065300	66055700	37648300	36038900	45935300	37279100	43207800	37269600	42636900	44161300	60663200	47479000	25889500	43211200	67968600	62508500	75888496
AAEEVIFGEPEVTTGAAGDLQQITGLAK	P400030249,Q9ZP50	3	58.7599	939.155	262100992	208867008	201067008	171370464	311165376	245440000	172610000	201974000	176935008	184400640	175455024	171008000	271041984	251198000	187828000	164766000	207337376	315169504	253246000	301340992
AILSEFVEIPAENR	P400030249,Q9ZP50	2	52.8959	794.427	55133740	67364808	59432912	45512980	86995728	59013500	68474240	78314504	41759420	51712632	88569336	44346000	73764424	56872160	45263500	31816110	33346600	48679000	59228900	53914032
AILSEFVEIPAENR	P400030249,Q9ZP50	3	52.6576	529.953	8412830	11338700	6588340	5027650	16471700	8958670	10763600	9427940	5167930	5250600	9880150	4929160	16511600	8891240	6576420	3984000	5666980	11665500	10217900	8194850
EQTLNQLLTEMDGFEGNTGIIVVAATNR	P400030249,Q9ZP50	3	70.6863	1012.18	null	null	null	null	null	null	null	null	1832910	null	null	null	null	null	null	null	null	null	null	null
ETMTGDEFR	P400030249,Q9ZP50	2	34.0882	543.232	null	null	null	null	null	null	null	null	null	null	null	null	null	null	null	null	null	null	null	null
ETMTGDEFR Oxidation (M) @0.001000000.0	P400030249,Q9ZP50	2	22.0184	551.23	116596000	92416496	50724900	46698500	105743000	106415000	83565400	111368000	52771900	52347400	69505296	34515700	93589200	77714200	102774000	55732900	36940700	65715600	72620400	85813200
GLTWFIPADDPTLISK	P400030249,Q9ZP50	2	60.1497	887.479	117387000	96738304	102642000	81978000	118404000	106082000	79323296	133122000	98716000	95892096	96845504	92666400	96688096	104646000	102134000	71654496	112529000	164375008	150268992	151672992
IVEVLLEK	P400030249,Q9ZP50	2	38.9398	471.798	232666704	212551968	150714544	76288704	138211680	165534464	182920000	192593088	112638000	152143008	169502608	82742232	236548032	171161920	183042304	132381320	123104464	209539728	217409488	170792992
IVEVLLEKETMTGDEFR Oxidation (M) @0.00000000001000000.0	P400030249,Q9ZP50	3	44.5241	675.682	31123200	28736700	14884000	8812230	14368900	26010300	16001800	35174400	13298800	14663600	21530900	12472600	18121000	26888600	44494700	22202100	30955900	51299900	40180700	43725400
KFDSDVSLEVIAMR Oxidation (M) @0.00000000000010.0	P400030249,Q9ZP50	3	42.7671	542.614	100554000	57966200	37415100	41407900	66647500	81034896	57785800	81446200	43811700	51885800	62353000	31565600	79215000	57423000	78685400	46188600	56314600	72389296	76207200	75501600
QVSVDVPDIK	P400030249,Q9ZP50	2	37.7689	550.308	417108000	347679680	215877120	135028096	216619200	286037600	199593792	217972608	130977720	180924096	186758128	128405984	262682112	211552896	206110512	232351200	235081296	381443520	271544704	335134496
FLEYLDKDR	P400030249,Q9ZP50,B9DHR0,O80860	2	37.0556	599.811	null	139464992	45893000	50710800	85116200	140768000	97928000	107844000	68711296	86709800	112210000	48304400	81527696	112719000	145558304	115903000	99845696	162855008	122414000	176092992
FLEYLDKDR	P400030249,Q9ZP50,B9DHR0,O80860	3	36.2323	400.21	329280864	312248992	102587000	106615640	168658176	246620688	163150000	181792624	115703064	155272000	202306640	104759984	167213632	215366288	278675232	199147488	205979456	323217472	245810096	333147808
GVLLVGPPGTGK	P400030249,Q9ZP50,Q8W585,A0A024IVR8,A0A037XV94,A0A067TYF2,A0A083ZGB3,H0H4A7,W1L4I6,W1L6E6,G6XVS3,F7UCP2,M8ACZ5,Q8LBL6,W8FLA8,B9J9H1,Q9M895,Q84LQ3,O80983,P400014432,P400034190	2	38.4697	547.834	693971010	506569984	371067008	245622000	339304992	364960000	339163008	540364990	294366016	349950016	409071008	248291008	535076992	506804000	554828030	415624992	414484000	669811970	546251010	697409980
ADILDSALLRPGR	P400030249,Q9ZP50,Q8W585,B9DHR0,O80860,B9DHT7	2	45.341	698.902	129149000	96991904	99607696	48098700	54909800	121021000	91411800	157544000	58622600	87488496	108698000	54662700	85100704	68628800	121133000	61092300	73336304	105692000	117379000	122406000
ADILDSALLRPGR	P400030249,Q9ZP50,Q8W585,B9DHR0,O80860,B9DHT7	3	45.3409	466.271	335500992	331808000	263756000	151611008	163462000	310774016	255479008	401560000	160948000	226538000	281100000	148330000	231962000	201526000	312931008	147996992	228114000	359622016	392998016	338984000
AKENAPCIVFVDEIDAVGR	P400030249,Q9ZP50,Q8W585,B9DHR0,O80860,B9DHT7	3	53.6353	701.692	48642800	67661296	49838900	57233200	55115700	71824600	54324900	60289000	64894700	62055400	108986000	64098700	82981000	91112272	66503600	33422790	69575696	127740000	107759000	94718896
FQMEPNTGVTFDDVAGVDEAK Oxidation (M) @0.001000000000000000000.0	P400030249,Q9ZP50,Q8W585,B9DHR0,O80860,B9DHT7	2	44.4472	1143.52	49735800	41613100	51446700	26820100	32942500	47682500	42914700	56087000	26837700	35705200	48175600	29686800	46929200	24527000	52390000	20095000	20496400	34139000	29891900	36719600
IVAGMEGTVMTDGK Oxidation (M) @0.00001000000000.0	P400030249,Q9ZP50,Q8W585,B9DHR0,O80860,B9DHT7	2	33.9351	712.842	null	null	null	null	null	null	null	null	null	null	null	null	null	null	null	null	null	null	null	null
QDFMEVVEFLK	P400030249,Q9ZP50,Q8W585,B9DHR0,O80860,B9DHT7	2	64.3424	692.847	null	null	null	null	null	null	null	null	null	null	1263840	2847020	null	null	null	null	null	null	null	null
TPGFSGADLANLLNEAAILAGR	P400030249,Q9ZP50,Q8W585,B9DHR0,O80860,B9DHT7	3	71.4156	724.39	48565100	48786100	34777948	84297440	100066000	60819500	42844632	78848600	24398880	59194752	25229410	41350420	23317800	61881340	18291900	null	52037600	81527504	82466368	17599600
TPGFSGADLANLLNEAAILAGRR	P400030249,Q9ZP50,Q8W585,B9DHR0,O80860,B9DHT7	3	68.1147	776.424	33760600	19217800	12647960	42065536	42584400	33256700	14937440	55138000	30267580	37039720	17823300	31723804	11413331	64158848	53426200	58820300	75285800	88911016	91709272	48989900
VQLPGLSQELLQK	P400030249,Q9ZP50,Q8W585,B9DHR0,O80860,B9DHT7	2	49.576	726.928	529620992	436556992	349864000	253419008	482404000	407571008	319380992	438687008	265247008	289521984	457404992	328596992	417431008	488009984	489135008	260251008	353047008	573078980	504942016	563134980
EIDDSIDR	P400030249,Q9ZP50,Q8W585,P400030977,B9DHR0,O80860,B9DHT7,Q4W5U8,P400030976,P400030978,P400030979	2	24.6293	481.726	279475008	226384992	95463400	103960000	220820000	229131008	167159008	222004992	120453000	147392992	152548000	88694304	183518000	187712000	229568000	172692000	114093000	205256000	188879008	210512992
KPSNPASAPAYGSNSR	P400030419,P400030416,P400030421	3	19.9927	535.266	4054180	3056860	3515030	1823260	6138860	4516110	2227300	6295300	2404080	4453860	3692850	1500980	4476040	4835290	5913370	5682010	5842330	8825750	4388270	7347610
LVENNNLR	P400030492	2	21.3556	486.267	14734100	12376400	5552330	4204390	11329700	10963100	6432340	9391100	4786810	8549300	7253620	4172800	10705200	12532000	15374500	12317400	10182600	16855900	13040800	20816500
SALGLTEGGPLFGFTK	P400030661	2	55.9788	797.931	382379008	226316992	150970000	162734000	238360000	233263008	210123008	231448992	198259008	189868992	334416000	236620000	259494000	276934016	275904992	180275008	305948992	412977984	332473984	523177984
VAMIGFAASLLGEAITGK Oxidation (M) @0.001000000000000000.0	P400030661,P54773,Q2LAH0,Q2LAH1,B3RFS0,B3RFS2,Q9SMB4,Q9FPP4	3	63.5892	588.993	134063056	92366816	67373672	126287984	106884480	85933104	59098600	132702408	66437240	61090700	75926784	74342200	118294000	126722000	2489410	84060000	123200000	198203104	125452000	94729608
VYVGNLSWGVDDLSLR	P400030711	2	59.1702	896.968	null	null	19313500	null	null	null	null	null	null	6985360	null	null	null	null	null	null	null	null	1789090	null
KSEQGEELSNAEER	P400030753	3	20.4633	535.917	4859530	null	null	139050	7364980	6930560	3356480	6046870	null	null	4196040	2929820	null	5471790	6107310	4822690	4742080	6898790	5209160	6124420
IAIGGGLISTPVIGWSLYTLK	P400031064	2	70.789	1080.13	null	null	null	null	null	null	null	null	null	null	null	null	null	null	null	null	null	null	null	null
AQPGVTATDVNVDEVR	P400031121	2	35.0821	835.924	243499008	255488992	94784800	112561000	107006000	260998000	165058000	164223008	112354000	140335008	178108992	116840000	196714000	233256000	254919008	187156992	160056992	169080000	213636000	294992000
ATELSVAEGSSAANWVPVVPLSALPK	P400031121	2	60.6323	1297.2	13490200	11187500	null	8184370	5882760	8178860	5896510	11533600	6456890	8529810	11114900	7224550	10669000	10690300	9625950	3747010	9994900	13577000	11779900	13998500
ATELSVAEGSSAANWVPVVPLSALPK	P400031121	3	60.5446	865.138	7090720	5575630	null	3171860	4288810	5771140	null	4482930	2968450	3788940	null	5508390	9780930	6654070	null	null	7457620	10662000	9332380	7694260
DDVFAIENR	P400031121	2	38.2445	539.764	19936000	11491200	14254200	7059510	8124480	9946940	13979700	12862200	6027460	9657120	14755000	6558410	16221900	9318340	6202420	9437850	5491560	10330200	7807230	8459680
EWYPNNPVLR	P400031121	2	43.007	644.331	70221400	54871900	38260200	29255700	39804400	65341900	53461500	60559800	41662600	52453100	60000300	33834600	73305600	40343900	45434300	34526500	40640600	67982704	59900500	60872900
GTGFLDFIYSVSDAFK	P400031121	2	72.2179	883.939	null	null	null	5397520	null	5422970	5629620	null	3136090	8628850	3770910	null	3052930	8311630	null	null	null	7769480	9024220	null
LTQDGCIVCPTTDSTFYLQNGAIK	P400031121	3	49.0057	901.435	9720810	null	8066590	8182850	9118460	8491000	8187790	11090200	4389040	4274380	9924020	5457480	13856300	7375980	9751580	1224330	null	12794200	6071220	9410190
MVIDEGQEAFGFTGR	P400031121	2	51.3575	828.888	null	null	null	null	null	null	null	null	null	null	null	null	null	null	null	null	null	null	null	null
MVIDEGQEAFGFTGR Oxidation (M) @0.100000000000000.0	P400031121	2	43.2614	836.89	224234384	151748000	112348000	96024800	112861000	166912000	131349000	163246000	72886704	72537104	128524000	78070800	164751008	112539000	136039008	87028600	84622304	143600992	126759000	152708000
MVIDEGQEAFGFTGR Oxidation (M) @0.100000000000000.0	P400031121	3	24.6536	558.257	null	1122520	993809	null	null	null	null	953910	null	2382810	1108480	705677	494289	783641	null	null	1477280	3144490	936263	1664150
SPAEGAYSEGLLNAK	P400031121	2	37.4288	753.878	237287008	166880992	75998800	93377504	125638000	164795008	130147000	152912992	90919504	116529000	108589000	88224304	158384000	173679008	165996992	132839000	128010000	197296992	161863008	225151008
TDDENIYISMR	P400031121	2	43.9673	678.809	null	null	null	null	null	null	null	null	null	null	null	null	null	null	null	null	null	null	null	null
TDDENIYISMR Oxidation (M) @0.00000000010.0	P400031121	2	31.0559	686.809	141012928	111383320	43243540	53694072	101825744	74077744	78911200	75312568	48799960	58460140	79804304	40658580	98005632	80166512	100543568	78278608	46486900	78548984	61915400	84520704
VDASAEIVFSGK	P400031121	2	39.6971	611.819	149959104	88217504	73047696	54161200	63468700	87035400	90056000	106211392	55750200	62935700	92648400	54806000	118508496	101499408	139900192	100379696	71893000	113231600	86710296	133479600
VIIQDGETILLLWYK	P400031121	2	69.0465	902.517	null	null	null	null	null	null	null	null	null	null	null	null	null	null	null	null	null	null	null	null
LEDKPDLMK Oxidation (M) @0.000000010.0	P400031316	2	32.5428	552.79	85152000	69670800	17080600	27904300	40369200	49979900	53280000	70795504	39760800	34451300	38182700	29610800	64825900	73191696	72600704	62049200	43586300	75327200	60670700	81610200
LLGVTEGASFDDILR	P400031451,P400031452	2	55.5701	803.432	14535600	8905650	7648370	7987040	11701300	9055300	8371440	11823200	8988740	7124100	13512900	7715880	14715300	8596150	8890770	7200640	9169770	15061600	11111800	15315300
FEALVYVLK	P400031700,P400063871,Q43364	2	51.7158	541.321	24278900	38868600	66757400	14480400	103268000	47984200	56160600	63787100	24846500	60010700	47981600	26335100	63023900	42570700	33488900	28083800	58845800	46560600	47070600	49843100
ILDEAMAGDNVGLLLR Oxidation (M) @0.0000010000000000.0	P400031700,P400063871,Q43364,Q40450,P68158	2	49.9307	858.457	106500800	115580032	186097504	70703296	219616592	105590992	146180160	164742896	50468968	109279848	91706752	58732352	151054208	121984232	81369344	64539720	118934632	118040552	88693664	104413600
KYDEIDAAPEER	P400031700,P400063871,Q43364,Q40450,P68158,P17745,A1BQW6	3	25.8679	479.23	26725600	26158000	47264200	11969097	104535192	57677872	53239488	54021532	17723080	47671620	27908286	13481208	51371260	31829020	25807000	21797970	46526920	42164260	24043300	36310840
STTVTGVEMFQK Oxidation (M) @0.000000001000.0	P400031700,Q40450,P68158	2	31.594	672.332	22663680	12444300	13806600	5037990	39824900	14647900	17013800	13351900	6927330	18765200	8304750	5968340	25074300	16212600	9620060	13510200	18400000	21315600	14249900	17061900
QVGVPNMVVFLNK Oxidation (M) @0.0000001000000.0	P400031700,Q40450,P68158,A1BQW6,P400063871,Q43364	2	43.8	730.903	26623200	23648200	49076800	8533190	36136800	45107900	38858300	25556400	10149000	25473400	13916700	8089930	32075100	13062200	17183400	12072200	25238000	27319500	14680300	21303300
DGEIENIFK	P400031941,P400031942	2	44.9541	532.769	41360700	41212800	27859700	19946400	19024600	32732600	32757000	42883000	15619900	30346400	38163000	24159700	33772700	25476000	44372100	27544500	22973400	35695900	47045400	44157500
AYIEALKEDPEQYR	P400031941,P400031942,Q7XAB8	3	37.8449	575.623	86711200	99001296	43537600	40797600	62632900	58847100	64465200	46371400	27618500	53755000	65980800	50906100	83093104	71020200	66989000	75988896	58706400	92577200	109338000	115416000
TQNANTLVDFSSK	P400031941,P400031942,Q7XAB8	2	36.8743	712.857	109992000	100841000	24569100	35281100	57299900	null	61176800	70591504	31832300	57813200	98236896	44579100	null	93357904	111690000	103929000	null	null	109143000	96904704
SVDRDLDVYR	P400031941,P400031942,Q7XAB8,A7XZB8,Q9SKT0	2	29.6841	619.315	13744600	14454000	2187920	3883320	14236500	13005300	6963640	12578500	5474870	7738860	7402910	4986190	11018000	14284700	19936300	21389500	16830150	21729900	21060900	31424100
GYVSEEEAGKR	P400031983,C0Z346,Q0WVW0,F4I2F8,Q9LL35,O48741,P400031982	3	19.2815	408.866	92575504	83385200	81092800	42331900	146998000	117063000	47203800	46034900	16830800	71842200	61189848	19950722	115684000	81292600	94988400	65679600	108265000	155395008	93290712	125340000
GNVIITGASSGLGLATAK	P400031983,Q8LSZ2	2	45.241	815.466	43055400	37309800	62201600	15956600	27818000	37134300	24156000	25337400	8184480	34315400	33620600	8529010	34104200	26395900	40567600	19220000	50206900	57743600	46480000	48695000
GNVIITGASSGLGLATAK	P400031983,Q8LSZ2	3	45.2426	543.98	19383600	14867800	28951100	6778130	12619800	15799900	8120230	9414660	2675500	10835800	11365100	3822470	16918800	12037700	18004700	8642570	21998800	34234900	21396800	22199800
KGNVIITGASSGLGLATAK	P400031983,Q8LSZ2	2	40.5833	879.514	16716400	17257100	19580800	3337250	12159800	14359300	8640650	5136230	2302480	12847100	9522870	2137830	19598700	10114500	17069700	12975400	22426100	29040300	20144400	15399900
KGNVIITGASSGLGLATAK	P400031983,Q8LSZ2	3	40.5849	586.678	68279600	94298600	126477000	41359300	109314000	103252000	56438100	46737200	15884300	77571600	72686200	21108600	129711000	65004600	88010400	67852000	118472000	169060992	118217000	80379104
FHEETGIAFASLYPGCIAETGLFR	P400031983,Q8LSZ2,P400031982,Q9LL35	3	63.9452	896.105	null	null	null	null	null	null	null	null	null	null	null	null	null	null	null	null	null	null	null	null
LAQVVRDPSLSK	P400031983,Q8LSZ2,Q9LL35,P400031982	3	27.8118	438.259	48289800	52392200	23628500	14511500	61762400	55867056	15681000	18421800	6102300	27293700	19065100	6105750	49484200	39712700	39731100	28016100	62056300	112500000	22599900	55434400
SGRPLDALVCNAAVYLPTAK	P400031983,Q8LSZ2,Q9LL35,P400031982	3	53.1806	706.049	34877400	47015700	69644800	35576700	76288896	66785400	39955400	24253100	16268500	60822700	68315400	23746200	93469296	61901000	41870200	21553600	82178000	124383000	83226400	85541104
GYVSEEEAGK	P400031983,Q9LL35,P400031982,C0Z346,Q0WVW0,F4I2F8,O48741	2	21.404	534.746	4534550	5646450	4352360	1861900	7407400	5530470	2106780	2555830	709330	3110440	3562820	857464	null	4485970	4565960	2452290	4667630	7725680	4543510	null
DIYSALNAVSGHYVSFGPTTPIPAK	P400031997	3	58.3516	869.119	58075200	42269000	49460100	32877800	60440900	44226400	45540000	57245680	65447900	77751800	94507400	52931300	69474096	117419000	80666800	66155700	134654000	215266000	193892992	179659008
EASNYWVAK	P400031997	2	31.0534	534.263	90986992	69300400	34088500	null	52406500	41633100	48760300	72509504	60599100	65941000	71561600	30395600	61545300	60025600	109265000	79328200	108150000	141718000	127002000	150446000
GDPNIADSVAELR	P400031997	2	42.8645	678.844	65531100	52721300	33094500	25195200	48691000	56150500	44895400	82302800	43287400	54463500	73589800	25484100	57431500	53288400	54189000	46449300	86453400	111062000	118934000	119541000
ILEEMDTAEK	P400031997	2	31.1548	589.786	null	6609650	2891800	null	null	null	null	5150210	2311220	8696040	4180260	1860420	null	2772650	null	null	8548230	16334700	4623740	7110810
ILEEMDTAEK Oxidation (M) @0.0000100000.0	P400031997	2	21.0798	597.783	288006976	268220384	82244624	138212576	260942768	290486624	160237536	290149024	154949616	156685408	166478480	71091936	189971024	315191072	358456992	286419936	289503008	302379104	376689664	517588864
STLNMDKGDPNIADSVAELR Oxidation (M) @0.00001000000000000000.0	P400031997	3	41.1504	721.355	129262000	98052600	61445248	51282700	83990224	112545000	76180000	110557000	65093300	64789088	92958800	32366600	83895520	86447800	126181992	111850360	107699000	168307408	135049200	169219904
ANLQGASFK	P400032278	2	25.9615	468.252	55455100	33326800	16894700	14133400	60964000	49656300	35926200	40860700	26881700	29971400	27534700	3481020	39479400	21466500	39759000	47269200	36426200	62470100	60492400	43919100
AYAVGASFK	P400032278	2	31.0599	457.244	41657900	21388500	14434300	10834600	30125000	28475800	21669800	26040800	18980400	23846000	23960900	2467570	31972800	6228100	24753700	30898800	24709100	37920100	38553400	55401700
FCDYTNEK	P400032278	2	23.7405	538.723	28698100	11856300	12124000	14357900	34906400	39671600	20842000	30836500	17573300	18419600	18717900	2656410	21843600	13175500	22132000	17156100	17007900	27013500	26561400	37317900
LPPLSTDPNR	P400032278	2	30.3497	555.303	38690600	24466900	14539300	9871900	36098000	48830100	30620400	39010700	19133500	23976200	23524800	1731210	38336900	null	21912000	36593600	15746300	41662900	30335000	45941400
AFVGNTIGQANGVYDKPLDLR	P400032278,F4JX83,P81760,P81760-2	3	45.3437	750.066	60944700	33247600	44108000	24188700	37865600	81925104	45849700	78257296	33490000	40093700	43015400	6034620	39061000	20628900	48778900	35492800	49386800	80181296	77556096	96326000
ALQEAFENADR	P400032317,P400032318	2	33.4047	632.305	18107400	12040300	4377310	4991650	8129690	15497400	7031280	8708150	4318920	6880470	5605510	4698850	12174400	10202100	10818000	7579380	14075000	17249600	8516810	18331000
SDEIVDFVR	P400032317,P400032318	2	43.2373	540.274	18353800	10064400	12083700	7071520	11176300	19262300	12045000	14335800	7532870	10419800	12956200	6632350	17375300	9865660	8808600	5160720	10921800	22859400	13394100	19658500
TQDNVSIVIADLGR	P400032317,P400032318	2	50.9272	750.908	7487010	6212580	7103290	5156280	10577600	8368770	6196870	7171250	4745530	5546470	8580930	5400500	11855900	10397900	10566400	2100930	6283490	11858600	6451090	12977500
ALDYENLNENVK	P400032447,P400032448	2	36.368	711.352	33245300	40605000	21994350	10193210	26799580	22820460	20771010	17084910	5659260	11683600	17208580	5251970	23673600	23293000	16062170	16273700	15375180	15513230	10969670	19474930
GVMQILNSIIR Oxidation (M) @0.00100000000.0	P400032447,P400032448	2	55.9944	630.364	25802100	25710490	22455810	16044430	13762530	13961790	10014050	15146310	7424490	5745800	14139870	7424030	24353350	26171800	10916880	8558080	15164590	16729480	13656400	20509000
DGYPSDPELIFLTDGASK	P400032447,P400032448,B9DFR2,Q9C5K2,Q9LR30,Q94B22,Q8LFE9,B9DH91,Q9S7E9	2	55.5507	962.966	12245600	14200500	8102860	7342840	5884850	5414260	3665000	6823300	3432530	null	7523150	4254840	11491400	13437100	6096760	3829970	5433270	7490260	5744380	11056600
LLEATGISTVPGSGFGQK	P400032447,P400032448,Q8LFE9,B9DFR2,B9DH91,Q9C5K2,Q9LR30,Q9S7E9,Q94B22,Q93Z05,P400028612	2	44.2499	881.477	36496900	39463900	35330100	18520300	14431700	23272700	15426100	33032400	10360300	13627000	17102600	9096220	36456000	24844500	28610700	12556100	21526500	25774000	24299700	28281300
DSGLNHVVIR	P400032511,P400032512	2	29.7783	555.309	4977120	4135060	2852480	2314750	5873750	6482400	3509100	7709650	6369230	7893920	7524360	4129370	7530260	5992440	5857520	7325370	5966380	13332300	9221900	12511200
IAYMDTQDIAR	P400032511,P400032512	2	41.9015	648.815	null	null	null	null	null	null	null	null	null	null	null	null	null	null	null	null	null	null	null	null
IAYMDTQDIAR Oxidation (M) @0.00010000000.0	P400032511,P400032512	2	30.1931	656.816	209351296	150946304	55278100	70722400	117313600	157019296	94038400	149923600	62695700	78815600	84749400	53334900	128627600	119872400	152531392	119651088	84658600	147032096	110755904	167235904
LFEWTNDVADR	P400032511,P400032512	2	46.0061	683.328	60803300	55371600	50023400	36060400	31068700	62145400	45337000	70725296	35118600	41118700	50500000	31779100	61443400	37348700	60132300	27034300	35680500	58756300	59305600	56889900
LTFIALR	P400032511,P400032512	2	45.785	417.268	148451008	141951008	97834096	72174800	66482800	200284992	105981000	178872000	77472096	91718496	119765000	71852800	143886000	101599000	143446000	65709600	113250000	203246000	157280992	166763008
YLQDYFTNILK	P400032511,P400032512	2	56.5223	709.375	98649200	65765600	66003500	58984800	72616400	60192800	60786600	64096100	49376300	51071800	92453600	54511500	82524000	81572000	58632500	42452000	44942400	67371504	74041800	75183696
ALDEGYDVR	P400032511,P400032512,O65502	2	29.7928	519.25	79664600	56043600	33777552	29058300	64781500	66667100	51178320	73737600	41010400	49496980	45837008	27042002	61351400	65226300	63625600	45419900	38038200	69472000	33042900	56349992
LAGQDANVTTVPVSVLR	P400032511,P400032512,O65502	2	44.4066	870.49	155703008	134670000	110811000	84128800	86894000	167719008	110794000	177992992	82181104	103573000	128360000	77162600	148120992	100198000	159310000	72506800	106185000	184864992	144560992	158418000
LCGFMQGLIGQYAVPILEEK	P400032511,P400032512,O65502	2	70.0545	1133.58	null	null	null	null	null	null	null	null	null	null	null	null	null	null	null	null	null	null	null	null
LLTFAGPR	P400032511,P400032512,O65502	2	37.9564	437.763	184577360	143063008	94004496	72067992	80697000	120128048	114875000	165044000	79088496	90151400	110336968	63357312	153554000	147272992	109735272	105558000	121645000	197976896	148943424	187242304
SVWGTDAPTR	P400032511,P400032512,O65502	2	30.8108	545.272	50970200	44481800	16177200	18415400	23430800	31366900	26355100	46244800	29114900	36117300	32318400	22675200	42953500	29262500	53474500	33732800	41244600	71476400	49395500	54505900
VALIQCAK	P400032511,P400032512,O65502	2	28.0197	451.761	95382096	100275000	21341800	25293000	68575000	75816400	43669400	74604496	37637900	46931100	39770300	18603000	61303300	60272500	42166500	20898600	45344300	76242200	34780200	61492400
RNLSGTIPEDIR	P400032855	2	46	685.871	176191776	133622608	131727552	89631696	84881960	153564368	99333824	186091296	86386720	94655704	112132320	93686168	128780048	98577488	136916320	73902376	119565528	191207808	144090064	149107504
EAALGDANADAINTGTF	P400033265	2	45.9965	825.888	167384992	165240992	299063008	89108496	193538000	214533056	180680992	125825000	51696200	148116000	148892000	94248304	306857984	140959312	179711904	143050000	212954000	246867008	156086000	256039488
KWVSGTGIEQIGDK	P400033265	3	35.0575	506.605	54970100	85905000	52656000	17241800	36705600	75775504	59276800	33036100	14546500	56568900	32861000	18825300	75275504	53051100	53915000	51091400	65056400	58439800	57976900	81670704
WVSGTGIEQIGDK	P400033265	2	39.3136	695.357	457404000	447599008	601747010	151820000	375950016	353088000	418307008	332049984	150256000	469108992	294216992	157563008	617203010	430695008	376707008	454524000	510531008	634710020	378171008	570892990
WVSGTGIEQIGDKLLNSR	P400033265	3	53.0429	658.357	7381060	10379100	null	7108090	12517300	23764900	1886650	7585670	4331450	8651510	1777980	6249570	null	36844900	29420200	33165500	92067296	83065504	33618200	79632096
LLGYGNMLVQEQENVK	P400033265,A1BQW4	2	51.5899	917.972	null	null	null	null	null	null	null	null	null	null	null	null	null	null	null	null	null	null	null	null
LLGYGNMLVQEQENVK Oxidation (M) @0.0000001000000000.0	P400033265,A1BQW4	2	41.9347	925.974	174816992	178730000	292616992	75772400	220842000	205314000	202604000	166484000	45362400	144431008	128700000	63551100	263191008	110044000	99084200	125671000	155934000	188892992	125440000	204175008
LLGYGNMLVQEQENVKR	P400033265,A1BQW4	2	48.2246	996.023	null	null	null	null	null	null	null	null	null	null	null	null	null	null	null	null	null	null	null	null
LLGYGNMLVQEQENVKR	P400033265,A1BQW4	3	48.2195	664.352	null	null	null	null	null	null	null	null	null	null	null	null	null	null	null	null	null	null	null	null
LLGYGNMLVQEQENVKR Oxidation (M) @0.00000010000000000.0	P400033265,A1BQW4	2	38.8668	1004.02	101769000	96870200	113213000	19187600	58063600	62759000	94988800	54194500	20890100	75939800	56108000	18637400	130345000	86054800	95266896	105505000	95900600	120196000	75766000	126800000
LLGYGNMLVQEQENVKR Oxidation (M) @0.00000010000000000.0	P400033265,A1BQW4	3	38.3134	669.685	1088087170	992065920	1410663680	388953856	896463940	894923070	963930750	793091460	257418416	790065600	692718460	343839392	1445196030	965477760	919259260	979887680	932994500	1233320190	792438590	1270905340
RVQLAETYLK	P400033265,A1BQW4,O49074,Q40565	2	33.6968	610.856	132089000	129714000	86940496	38634600	133604000	191166000	131961000	106534000	35436900	119425000	69802096	41276600	175948992	131283000	134522000	177002176	198224000	182968992	125079000	239470000
VQLAETYLK	P400033265,A1BQW4,O49074,Q40565	2	37.2376	532.805	1103031940	1060390020	776969980	314044000	934188030	1276600060	938801980	759403010	249126000	852931010	401064000	303943008	1228519940	884604030	807809980	1023849980	1241830020	1360050050	857542020	1402520060
GLYENASDDQQDIAR	P400033265,E5KXY0	2	31.2597	847.888	470966560	502485696	343537376	189987680	629218430	404167296	437803200	325195040	129508512	449278400	350257984	169750640	590580990	437509792	404036608	468075520	524800672	516737312	372340704	636426500
LDGFYIAPSFMDK Oxidation (M) @0.0000000000100.0	P400033265,E5KXY0	2	49.8966	760.364	122815000	159974000	304547008	72407696	204156000	133009000	172138000	110376000	47298300	153635008	131798000	75613504	235556992	142727008	120746000	92214896	118884000	156502000	121600000	162060000
NFLSLPNIK	P400033265,E5KXY0	2	51.3841	523.308	675577980	823891010	1052308290	387467008	1071539970	811115010	811498620	685006020	273507008	724059010	541585980	399304992	1159949950	842505020	694392000	568937020	932054980	1176179970	790385020	1221980030
QENCRVPIIVTGNDFSTLYAPLIR	P400033265,E5KXY0	3	57.7777	926.159	65660100	48317768	43493568	36674960	85142000	60523192	30244150	36802440	26199130	43529928	39284640	27473840	59588200	64799800	39462928	35913680	123034600	139128000	71785904	124258304
TYQMDNKLDGFYIAPSFMDK 2 Oxidation (M) @0.00010000000000000100.0	P400033265,E5KXY0	3	47.4934	806.036	153140000	156002000	196355008	85153904	151574000	214028992	135076000	123017000	40599800	119951000	96546496	72670304	199980992	165884992	151243008	119837000	142132992	189184000	106627000	169888992
TYQMDNKLDGFYIAPSFMDK Oxidation (M) @0.00000000000000000100.0	P400033265,E5KXY0	3	54.4317	800.702	null	null	null	null	null	null	null	null	null	null	null	null	null	null	null	null	null	null	null	null
MGINPIMMSAGELESGNAGEPAK 3 Oxidation (M) @0.10000011000000000000000.0	P400033265,E5KXY0,F4IVZ7,Q8H172,Q941B7,P10896,P10896-2,O49074,Q40460,Q40565,P400019559,P400019560,P400019561	3	40.0696	784.693	101983600	175462912	242490080	78098704	122654200	197409888	152851808	120179296	20403210	93718096	48530672	39479288	180958000	71356600	172457200	213531200	108443400	165176800	120896304	134875296
IVDSFPGQSIDFFGALR	P400033265,E5KXY0,O49074	2	66.2712	934.986	1035905220	865315900	1637947010	681653630	1777258240	1201621760	1152577280	1060490240	416521728	1245323780	1052391230	621456960	1721143940	1261686270	41225360	1008566720	1526171900	1574417540	1107444990	1552571140
IVDSFPGQSIDFFGALR	P400033265,E5KXY0,O49074	3	60.9989	623.66	43715200	38849400	58214400	47143984	90476096	72736896	35361300	44389640	22680730	33676900	53893900	23411900	87152800	51770700	28258200	46551500	95590496	135200992	84510600	92992704
TDNVPEEAVVK	P400033265,E5KXY0,O49074	2	28.6171	600.811	1033510020	1111469950	690547970	347228992	1447410050	1260189950	960268030	888942980	268396992	899571970	584976000	314879008	1347970050	1000600000	904190980	963620990	1140419970	1478569980	549910020	1085620350
GNMCCLFINDLDAGAGR	P400033265,E5KXY0,O49074,Q40460	2	57.1653	942.414	null	null	null	null	null	null	null	null	null	null	null	null	null	null	null	null	null	null	null	null
GNMCCLFINDLDAGAGR Oxidation (M) @0.00100000000000000.0	P400033265,E5KXY0,O49074,Q40460	2	47.6773	950.416	39433000	51972300	86174600	22938100	63786300	79105600	61426600	58769700	18475000	55024900	41088400	22079300	85279696	50994600	44652300	11627600	57967600	72750096	44584200	52402000
KGNMCCLFINDLDAGAGR	P400033265,E5KXY0,O49074,Q40460	3	52.1036	671.31	null	null	null	null	null	null	null	null	null	null	null	null	null	null	null	null	null	null	null	null
KGNMCCLFINDLDAGAGR Oxidation (M) @0.000100000000000000.0	P400033265,E5KXY0,O49074,Q40460	2	43.2641	1014.46	36528800	33164700	39973600	5230030	17676100	71170600	41156600	36220700	8414110	34084000	12172700	6254100	51265400	20222100	22974000	9557610	46628100	56891900	26909000	50798600
KGNMCCLFINDLDAGAGR Oxidation (M) @0.000100000000000000.0	P400033265,E5KXY0,O49074,Q40460	3	42.7978	676.645	170000992	188482000	286543008	91531400	273113408	340096192	245961888	206000976	72418800	228967248	140252016	71369000	367610496	133670000	119446000	51724200	247100032	301477728	162244992	258162352
MGINPIMMSAGELESGNAGEPAK 2 Oxidation (M) @0.10000010000000000000000.0	P400033265,E5KXY0,P400019559,P400019560,P400019561,F4IVZ7,Q8H172,Q941B7,P10896,P10896-2,O49074,Q40460,Q40565	2	48.4751	1168.53	null	null	6901860	null	null	null	null	null	null	2835440	1483650	null	null	null	null	null	null	null	null	null
KMGINPIMMSAGELESGNAGEPAK 2 Oxidation (M) @0.010000001000000000000000.0	P400033265,E5KXY0,P400019559,P400019560,P400019561,O49074,Q40460,Q40565	3	43.2324	822.054	null	null	null	null	1519270	null	2067250	1122340	null	1087880	null	null	null	null	null	null	null	null	null	null
MGINPIMMSAGELESGNAGEPAK	P400033265,E5KXY0,P400019559,P400019560,P400019561,O49074,Q40460,Q40565,F4IVZ7,Q8H172,Q941B7,P10896,P10896-2	2	56.6076	1152.54	null	null	null	null	null	null	null	null	null	null	null	null	null	null	null	null	null	null	null	null
MGINPIMMSAGELESGNAGEPAK 2 Oxidation (M) @0.00000011000000000000000.0	P400033265,E5KXY0,P400019559,P400019560,P400019561,O49074,Q40460,Q40565,F4IVZ7,Q8H172,Q941B7,P10896,P10896-2	2	47.5288	1168.53	null	null	null	null	null	null	null	null	null	null	null	null	null	null	null	null	null	null	null	null
MGINPIMMSAGELESGNAGEPAK 2 Oxidation (M) @0.10000001000000000000000.0	P400033265,E5KXY0,P400019559,P400019560,P400019561,O49074,Q40460,Q40565,F4IVZ7,Q8H172,Q941B7,P10896,P10896-2	3	50.0843	779.358	null	null	null	null	null	null	null	null	null	null	null	null	null	null	null	null	null	null	null	null
MGINPIMMSAGELESGNAGEPAK 3 Oxidation (M) @0.10000011000000000000000.0	P400033265,E5KXY0,P400019559,P400019560,P400019561,O49074,Q40460,Q40565,F4IVZ7,Q8H172,Q941B7,P10896,P10896-2	2	39.9483	1176.54	255690800	450616992	144718000	118688000	394928608	359777888	413532032	283136704	57898400	274453312	201000400	101806000	122798000	161168288	231783616	285240608	301343008	236865808	203977088	282715584
MGINPIMMSAGELESGNAGEPAK Oxidation (M) @0.00000010000000000000000.0	P400033265,E5KXY0,P400019559,P400019560,P400019561,O49074,Q40460,Q40565,F4IVZ7,Q8H172,Q941B7,P10896,P10896-2	2	52.665	1160.53	null	null	null	null	null	null	null	null	null	null	null	null	null	null	null	null	null	null	null	null
KMGINPIMMSAGELESGNAGEPAK 3 Oxidation (M) @0.010000011000000000000000.0	P400033265,E5KXY0,P400019559,P400019560,P400019561,O49074,Q40565,Q40460	3	35.2674	827.391	127770896	124993704	83696096	32574800	74336496	104481000	95752800	81361696	22493660	70599104	72128896	28124790	143578208	94515296	83994200	79259800	69527296	65717200	55602572	95575904
SFQCELVFR	P400033265,E5KXY0,P400019559,P400019560,P400019561,O49074,Q40565,Q40460	2	44.4863	593.293	224494000	323136416	518743008	111907000	301270016	437196992	429734016	360008992	118568000	423808000	248646000	113947000	563707010	188416000	233720992	125003000	425049984	506352000	351764000	448191008
SFQCELVFRK	P400033265,E5KXY0,P400019559,P400019560,P400019561,O49074,Q40565,Q40460	2	37.7019	657.34	44744200	38715900	27318300	12081400	45049400	57545700	31523100	40800100	15824600	42921700	24591700	11436600	57781000	52311900	34854300	42167900	96830200	114289000	53375200	99338400
VPIIVTGNDFSTLYAPLIR	P400033265,E5KXY0,P400019559,P400019560,P400019561,P400019558,O49074,Q40460,Q40565	3	62.3224	697.065	199500720	187906448	308047296	211934448	601102980	328640736	230567856	278584896	91776008	204590384	169097968	147471568	573422980	181978832	130814272	254070528	320152352	424581984	277084416	339351616
YREAAEIIR	P400033265,E5KXY0,P400019559,P400019560,P400019561,P400019558,O49074,Q40460,Q40565	2	26.455	560.81	69752096	74447904	17960100	12033300	92623000	85556400	42415400	51636400	13661600	53204400	17564900	10760600	68010800	63134300	62562000	59529700	105116000	120240000	62339700	142627008
VPIIVTGNDFSTLYAPLIR	P400033265,E5KXY0,P400019559,P400019560,P400019561,P400019558,O49074,Q40565,Q40460	2	64.705	1045.09	585611140	676375040	1050729920	465606112	1094131460	618554880	715304830	692475010	261154528	834044860	714150140	360614016	985055040	483231840	1523682	528332320	814284800	896073220	647043710	912771010
MGGTTQYTVNNQMVNATLMNIADNPTNVQLPGMYNK 4 Oxidation (M) @0.100000000000100000100000000000001000.0	P400033265,E5KXY0,P400019559,P400019560,P400019561,P400019558,Q0WLM1,O49074,Q40460,Q40565,F4IVZ7,Q8H172,Q941B7,P10896,P10896-2	3	52.4355	1336.62	79872496	87418400	135088992	64113700	122555000	67511904	70820704	52835900	14189100	44481400	36736100	24807500	84046400	67938400	47906000	51177300	34637400	40536100	22821100	36638600
VPLILGVWGGK	P400033265,E5KXY0,P400025024,O49074,Q40565	2	56.1161	569.856	775922180	736932670	686601340	389324992	1040134340	740831100	809633660	529828992	301324416	864626240	704199300	420928000	1285439740	795058940	578193980	560525890	1183967870	1246390020	895415170	1232545920
DGPPTFEQPK	P400033265,O49074	2	29.7	558.274	887529020	929840000	700830980	299288000	1270060030	1134249980	811264000	767422980	250091008	765609980	538027010	286371008	929721020	787558980	835249020	928857980	1007580030	1164489980	663433980	1338669950
VYDDEVR	P400033265,P400019559,P400019560,P400019561,F4IVZ7,Q8H172,Q941B7,P10896,P10896-2,A1BQW4,P400019558,Q0WLM1,O49074,Q40460,Q40565	2	21.8924	448.212	51747800	70092704	65455500	20964200	88996000	63355800	69070400	55763100	13003400	31662400	35366600	17800000	90518096	38482000	38345900	21318300	37446100	66197100	47268800	82738896
LVVHITK	P400033265,P400019559,P400019560,P400019561,F4IVZ7,Q8H172,Q941B7,P10896,P10896-2,O49074,Q40565,Q40460	2	25.6238	405.267	59688600	84788600	34279900	9799260	77937600	63745500	67619696	37296000	25992500	121756000	31897500	18477500	112428000	87867504	79197200	114568000	171638000	178432000	106234000	72584000
VYDDEVRK	P400033265,P400019559,P400019560,P400019561,P400019558,F4IVZ7,Q8H172,Q941B7,P10896,P10896-2,Q0WLM1,A1BQW4,O49074,Q40565,Q40460	2	16.4584	512.259	271979	635718	431623	357976	923432	676079	365471	459660	127592	205479	282548	88316.9	458370	196861	296258	269645	null	421441	153418	693220
QIASLVQR	P400033339,P400035369,P25851,Q9XF82	2	31.9667	457.777	923368000	680896770	191655296	263579200	474280288	742089600	471162304	676351300	498408064	447896896	445994208	274927488	611846780	767129090	901267970	753384380	831335040	1138305410	922253380	1200179330
WAMLGAFGCITPEVLEK	P400033445	2	66.146	961.482	null	null	null	null	null	null	null	null	null	null	null	null	null	null	null	null	null	null	null	null
WAMLGAFGCITPEVLEK Oxidation (M) @0.00100000000000000.0	P400033445	3	56.4645	646.659	6636230	6412910	null	null	16384400	8510700	3702760	6912746	6891720	null	7046160	null	null	6776770	null	null	4503280	14515400	9073220	16416400
INGLPGVGEGNNLYPGGQYFDPLGLADDPTTFAELK	P400033445,Q5DNZ6,P400033446	3	67.0147	1250.62	183616000	157556000	72451400	92699904	125691000	110700000	94877600	109499000	65651400	79578000	52447300	79056800	97509200	173188000	97143904	107200000	159387008	200428000	179780000	136248992
INGLPGVGEGNNLYPGGQYFDPLGLADDPTTFAELK	P400033445,Q5DNZ6,P400033446	4	65.9527	938.22	8116850	13454400	5045580	24839700	14795700	9737900	3541270	14309300	3400920	7547210	4475610	8926140	null	7420500	null	6706210	null	23324100	26859800	8425670
GPLENLLDHLDNPVANNAWVYATK	P400033445,Q5DNZ6,P400033446,P27489,P400015035	3	65.5685	888.79	50998600	15795300	62494900	47990000	34481000	20147300	30267300	128757000	98040872	79716928	18435300	24675300	15767000	171815744	78953296	28430200	56980900	95803656	220349520	3755810
VDFKEPVWFK	P400033445,Q5DNZ6,P400033446,Q9S7M0,C0Z239,P27489,P400015035	2	46.2296	647.848	1100675460	750313020	483510016	390480992	436848992	1062249980	708766980	1057939970	622984190	630012030	1034249980	739035010	879631740	888796030	1267500030	587718980	936126020	1473260030	1235250050	1460809980
IGEITEIIK	P400033477,P400033478	2	44.9885	508.306	null	null	21903700	null	null	null	null	null	null	18178100	13096000	null	null	null	null	null	null	null	null	37089400
AIVSSDVGMTPNNDGEVIR Oxidation (M) @0.0000000010000000000.0	P400033644	2	35.6572	995.485	15171800	13127700	17359900	5058230	19996080	22722300	19637100	16052800	3357510	11099200	8310210	3752030	21875000	13411400	12694300	15882000	12494800	6659600	8424990	11283300
VTNTGTGTQETVR	P400033771,P32045	2	15.304	682.345	214957	310767	null	56146.7	311091	null	null	342360	null	74539.9	170797	32424.2	null	69377.4	643388	null	940503	353924	611117	320928
LGELLSSGQLTNIVGVPTSK	P400033807	2	53.5558	1007.07	11137400	16409100	30363800	7035740	21637000	15021800	23762800	12549200	5232510	18534900	12385000	9176830	22752800	15062400	10368100	13321800	24461900	24821600	15525200	13482800
GPFDNLLQHISDPWHNTIIQTLSN	P400033906	3	72.168	920.797	null	null	null	null	null	null	null	null	null	null	null	null	null	null	null	null	null	null	null	null
GQWLPGLASPDYLDGSLPGDNGFDPLGLAEDPENLK	P400033906,Q1H8L9	3	68.4495	1256.62	44251000	24960000	9792510	27923000	25653800	7391360	35748888	25520490	32374200	29212990	4703460	null	10721200	35636000	27239390	9694350	11345700	14402300	48843500	11563900
LAMLAFLGFIVQHNVTGK Oxidation (M) @0.001000000000000000.0	P400033906,Q1H8L9,Q7M1K9,Q7M1K8,P400055858	3	63.6549	659.036	667181950	440283520	358467808	474696832	699754560	495778080	506571648	964458110	822095420	595540160	792546820	628254270	732208380	1095645570	56360156	603139780	892135040	1767436930	1101739780	1048227200
WQDIKNPGSVNQDPIFK	P400033906,Q1H8L9,Q9FPI3,Q40481,Q7M1K9,Q7M1K8,P400055858,P27521	2	41.2273	993.512	95863200	69517296	30773900	21603500	29195000	79595504	60111100	79456600	50899400	49308700	43632700	22964100	66792800	80797504	169188000	83448000	112533000	175264992	131809000	196543008
MCAEAIVEGSENGKR	P400033908	3	36.9454	550.924	null	null	null	null	null	null	null	null	null	null	null	null	null	null	null	null	null	null	null	null
MCAEAIVEGSENGKR Oxidation (M) @0.100000000000000.0	P400033908	3	25.6201	556.257	67915600	77986704	32669800	20861200	54723200	49158200	29098000	22195200	11655200	44459600	30094800	8611060	52266500	34641100	48393300	32723300	42711800	57662600	41482800	28241900
AAEAGASVLNGLFLR	P400033908,B7SGD2,B7SGD5,B7SGD4,B7SGD6,B7SGE3,B7SGE4	2	55.7543	744.92	214200368	162311600	139799616	114058368	189869552	135478816	91554784	83863776	60886128	163548480	192207008	67162624	193218384	139841344	131644208	107802864	168096592	206864992	212711184	241070576
CTLEVDAVIGADGANSR	P400033908,B7SGD2,B7SGD5,B7SGE0,B7SGE2,B7SGE7,B7SGE8,B7SGF0,B7SGF2,B7SGF4,B7SGD4,B7SGD6,B7SGE3,B7SGE4	2	42.8022	874.421	24407100	14996300	18067700	6883570	18037700	18249000	9792480	10889300	2230640	20046800	14113000	4532880	15612400	8028270	10611500	9945430	16418200	15135200	10270200	14027900
GGIETFLIER	P400033908,Q9ZS34	2	48.9694	567.814	261310592	247380000	227410000	109831000	238184992	178645184	118133000	130254000	64771900	173868992	214040992	73435200	246916992	171411904	170284096	124425000	189710000	278459008	247548000	251279008
VAPGNPIEDLK	P400033908,Q9ZS34	2	37.6114	576.819	346432992	308020000	239004000	92133504	186132992	211076992	125164000	137162000	62266700	221338000	145356992	51714600	250202000	160492000	154908000	162027008	222254000	299144000	262424992	269392000
VAVVGGGPAGGAAAETLAK	P400033908,Q9ZS34	2	36.1034	798.445	466736000	478814016	279176992	148164000	290689984	364697984	192087008	206936992	100958000	342336000	349207008	76716096	364116000	273364000	333636000	339219008	358600000	321860992	380344000	431636000
VLDILQK	P400033908,Q9ZS34	2	42.9758	414.764	395233792	337970400	265474304	96664984	219212304	254738304	144878400	135584992	106244896	229192112	196567504	75435800	285781504	197774208	182273200	199450000	287512096	417727424	309478624	343540512
SINAGDYEYAIAFQER	P400033908,Q9ZS34,B7SGD2,B7SGD4,B7SGD5,B7SGD6,B7SGE3,B7SGE4,B7SGD3,B7SGD7,B7SGD9,B7SGE0,B7SGE2,B7SGE5,B7SGE6,B7SGE7,B7SGE8,B7SGE9,B7SGF0,B7SGF1,B7SGF2,B7SGF3,B7SGF4	2	48.3441	923.939	104179000	97549000	130261000	54404900	116341000	73549904	48860500	42437600	27386000	96988200	86376896	33528700	114709000	83721104	88258304	54032800	87025200	108482000	101102000	80334496
CSGEGIYFAAK	P400033908,Q9ZS34,Q9CA67	2	35.0206	601.782	81010200	88588896	44570000	24659100	39450800	65999700	28352600	27373900	15930100	59018800	43059500	13362200	51673000	41530200	47839200	40509900	64335900	53108500	68413400	78345480
LAVNTIGSLVR	P400033908,Q9ZS34,Q9CA67	2	44.0604	571.851	486843744	485422016	560497980	162094064	308074016	521859552	257418304	350227744	130581000	455853824	345316000	108062000	514643648	229601280	402525632	238506608	493008768	626181440	585760320	478135072
MTFDSYLYK Oxidation (M) @0.100000000.0	P400033908,Q9ZS34,Q9CA67	2	40.3811	592.273	34042900	73855504	101067000	31023300	54119100	37807800	43021300	33927100	18452800	62526300	57067700	14729200	71647400	29122800	48454900	42833900	41415700	49336000	54702000	36245300
VALVGDAAGYVTK	P400033908,Q9ZS34,Q9CA67	2	39.6263	632.354	374536000	340176000	313724992	118069000	243328000	249236000	161684992	158668992	84917296	299208000	224518000	64927300	348276992	233942000	269209984	249308992	345811008	420113984	365888000	376385984
AADSSQPTSAITSSDK	P400034000	2	23.8426	783.371	60158300	36921500	16632300	29557200	43150800	55071000	31215100	45919400	22727100	29443900	31382100	18277300	39457300	44731100	51910300	43866400	31965400	46793900	43411100	67456000
ALQLSDFEK	P400034000	2	42.2276	525.779	34478500	24894100	21470000	12454700	18054100	22404800	24490600	29005700	14487000	18044900	19009800	11634100	28911600	16201000	15325400	10626300	15726200	28729100	22168400	28976600
FTSFFGPGISSEIVK	P400034000	2	54.0858	808.427	73414200	53861100	null	54919400	null	45065300	55052700	43493800	38922500	38972800	100842000	46056500	null	77008704	null	28878000	null	null	81957400	75207696
FTSFFGPGISSEIVKGENDLYEVR	P400034000	3	59.0857	897.786	44640200	22213900	15884800	22665600	25442300	30535600	18204200	26262200	26462800	22136300	16101100	24026700	20979300	47556600	30692000	24325700	29153200	61233100	44589500	42861300
GENDLYEVR	P400034000	2	30.694	547.761	61804300	47241600	19624600	23023400	29655100	47323300	34553900	46435900	24743900	32676700	42162000	20231300	48127600	29367800	47818100	37101400	25799700	54615500	38210700	53353900
IFQFGLGGGIPR	P400034000	2	51.2348	631.359	122034000	129583000	67249104	86085800	158527008	144688000	108393000	158474000	87288496	100927000	178743008	113108000	150476992	200576992	171668000	98678552	125105000	171004992	177420000	250850000
YAELKPVPCVTYADAELLR	P400034000	3	49.8045	736.722	73666200	64708100	37174832	38923800	74797504	66596200	53675500	68621504	55533900	53261488	77175128	51769100	78203104	88946400	79909400	30489300	62676500	111044304	88725696	115277696
EVEYLLK	P400034002,A9YTZ8,A9YTZ9,P26574,A9YTZ7,P400041818,P10647,P26575,P26577,P400022435,P400022438,P26576,P400022437,P400045850,P400045852,P400045853,P22433,P32764	2	36.335	447.255	1981209980	2042050050	1603480060	485812992	1990060030	2083990020	2776399870	2127660030	703286980	2065240060	1487190020	590918980	2707239940	1781869950	1450279940	1648120060	2448140030	1942390020	2350710020	2479389950
LPMFGCTDATQVLAEVQECK	P400034002,A9YTZ8,P26574,A9YTZ9	2	61.1808	1149.03	null	null	null	null	null	null	null	null	null	null	null	null	null	null	null	null	null	null	null	null
LPMFGCTDATQVLAEVQECK	P400034002,A9YTZ8,P26574,A9YTZ9	3	61.18	766.36	null	null	null	null	null	null	null	null	null	null	null	null	null	null	null	null	null	null	null	null
LPMFGCTDATQVLAEVQECK Oxidation (M) @0.00100000000000000000.0	P400034002,A9YTZ8,P26574,A9YTZ9	2	54.2441	1157.04	81214896	130767000	101211056	62368400	72677824	149158000	203427072	133586000	65611700	158816000	89393408	64604700	123320568	168606672	97734304	34969000	252248928	231424000	166937312	257915424
LPMFGCTDATQVLAEVQECK Oxidation (M) @0.00100000000000000000.0	P400034002,A9YTZ8,P26574,A9YTZ9	3	54.3852	771.694	53934000	89075800	77415200	40667200	149999008	142051008	146386000	98311600	46921300	106869000	58560900	44938800	130898000	104553000	48595600	34071000	162882000	165656992	119171000	174406000
KYETLSYLPDLTDEQLLK	P400034002,A9YTZ8,P26574,A9YTZ9,A9YTZ7	2	54.2277	1085.07	23612600	26450400	29226700	12909500	43228500	35723800	62863300	37137400	16113600	44274200	29144900	18910400	37489900	40842600	20449000	20802500	38859400	35834900	40757700	41080000
KYETLSYLPDLTDEQLLK	P400034002,A9YTZ8,P26574,A9YTZ9,A9YTZ7	3	54.1695	723.719	110795000	158091008	194846000	71614096	208658000	159324000	250776992	148182000	74042784	189588992	116169000	75899000	171004000	180207008	92573296	106223000	168488992	170928000	167108000	176530000
YETLSYLPDLTDEQLLK	P400034002,A9YTZ8,P26574,A9YTZ9,A9YTZ7	2	58.2783	1021.03	188044000	171948000	370087008	89053296	309828000	193364000	327463008	171392000	90566800	260372000	192922000	120644000	311684000	246280992	128240000	158050000	268969568	299100992	274073984	246456992
YETLSYLPDLTDEQLLK	P400034002,A9YTZ8,P26574,A9YTZ9,A9YTZ7	3	58.2828	681.021	6107950	7660920	13114000	null	12829300	10647700	12932000	6035130	3832080	6582190	3279110	2527960	25121000	7916130	4066310	3578150	16587700	24271200	17936500	11391100
IIGFDNVRQVQCISFIAYKPEGY	P400034002,A9YTZ8,P26574,A9YTZ9,A9YTZ7,P26575,P26576,P26577,P400022435,P400022437,P400022438,P400045850,P400045852,P400045853,P22433,P69249,P69250,P26573,P400041818,P10647,P32764,P05349,P07180,P07179,Q84QE5	3	56.9126	906.468	14228800	15870500	16898100	6138250	33396500	17922900	23100900	18768600	13840800	33322200	18508200	13602800	37833700	32783400	17406100	12923300	46148900	69154896	38138900	36546300
QVQCISFIAYKPEGY	P400034002,A9YTZ8,P26574,A9YTZ9,A9YTZ7,Q84QE5,P10647,P400041818,P07179,P05349,P07180,P22433,P26575,P26576,P26577,P400022435,P400022437,P400022438,P400045850,P400045852,P400045853,P69249,P69250,P26573,P32764	3	49.5287	601.634	38461900	67279904	51682400	13512500	95352400	67593200	54873400	48423300	16301200	37010800	30809400	20376000	91992800	53121100	35170900	26118200	97890096	170012000	98878096	106835000
QVQCISFIAYKPEGY	P400034002,A9YTZ8,P26574,A9YTZ9,A9YTZ7,Q84QE5,P26575,P26576,P26577,P400022435,P400022437,P400022438,P400045850,P400045852,P400045853,P22433,P69249,P69250,P26573,P400041818,P10647,P32764,P05349,P07180,P07179	2	49.5292	901.947	734153980	852044990	1100850050	319832992	1696329980	1035160000	1162729980	933944000	389128000	1017619970	762609980	516199008	1102089980	1094450050	900918020	461551008	1830909950	2024290050	1414259970	1776780030
IIGFDNVR	P400034002,A9YTZ8,P26574,A9YTZ9,A9YTZ7,Q84QE5,P26575,P26576,P26577,P400022435,P400022437,P400022438,P400045850,P400045852,P400045853,P22433,P69249,P69250,P26573,Q8SAQ3,P400041818,P10647,P32764,P05349,P07180,P08706,P07179	2	40.6251	467.263	3538963200	3046992380	3341524480	927848190	3330953220	2949903870	3926455300	3013113340	1115738620	3245489410	1779035650	1045729410	4508024800	3773363970	3146778370	3387966980	5955408900	6496156700	4711476200	5988566000
ENNKSPGYYDGR	P400034002,P22433,P07179,P69249,P69250,Q84QE5,P26575,P26576,P26577,P400022435,P400022437,P400022438,P400045850,P400045852,P400045853	3	18.6722	467.214	163041312	153462176	121743952	67872120	293930816	232894816	188398112	212349152	75133504	151120512	102391984	71418568	200062256	192542224	179411280	147615264	231973216	279422688	184176992	294488608
ENNKSPGYYDGR	P400034002,Q84QE5,P26575,P26576,P26577,P400022435,P400022437,P400022438,P400045850,P400045852,P400045853,P22433,P69249,P69250,P07179	2	19.2982	700.317	11617300	14792300	4873170	2227825	22718400	18164800	18722010	20518880	5309068	15278235	4173779	2605316	16966900	13353200	13664200	13690000	23235600	28216700	20040200	37402208
VGISTDETGEK	P400034084	2	23.0404	568.279	11844800	7718450	2931830	3585020	8319380	8459570	3600040	6893900	2444960	5467090	5820630	1745730	7803030	8302800	10979200	8715680	7869590	13433700	10916600	17303300
EVQPENPNSYR	P400034108,P30155	2	26.0033	666.815	21294100	12975700	15829300	5525720	25983400	12574500	14246500	14357400	8287970	19161000	13702200	7954400	17000900	18803600	24167400	22302600	24458100	32765900	23008600	28072000
LVDIDVEAVK	P400034427	2	40.7592	550.816	80750800	null	null	null	41977400	98916800	62110200	91166200	null	620082	57211800	null	91098496	null	null	null	null	93519200	105106000	null
QDEDPRPPDNPDNPYGFLK	P400034427,Q9S9N6	3	41.8553	738.678	15324700	13241600	12614900	9747480	11894100	12247300	9630960	16734700	5805500	7626820	12785200	6519040	9493540	5318580	5375690	8789200	6097590	12076200	9689480	12422500
KPVTIVYK	P400034518,P400034519	2	24.0554	474.301	29538400	21029700	12002600	18510200	21642600	25561900	18627300	27798400	15618000	18772400	17350400	11359400	22417100	23491700	23002100	23208800	13385100	19604700	18988300	27040000
KPVTIVYKGEDK	P400034518,P400034519	3	22.0673	459.598	32054800	28544000	8344330	21505400	25479400	32269000	15481600	30496600	14915800	17675700	19116400	14663500	23618500	29581200	33833100	28275700	25691600	32784200	28305100	44863800
LADDASSELVDIR	P400034518,P400034519	2	41.0357	702.357	62095300	75397000	45021500	43855300	50818300	78611504	52954552	74408400	46362900	49051588	51842200	42531712	66328400	48373900	91220000	62011200	69574000	106937000	79159000	118433000
NSGLPWILPK	P400034518,P400034519	2	51.8283	562.829	51352500	65953500	39857900	42236900	56112900	59800600	49946700	77768096	50080100	53462500	87346000	65493000	57629900	71027000	65688200	41526300	63621600	87977104	80659296	97596600
QIGLALLPVPVTR	P400034518,P400034519	2	55.2871	688.938	215610000	167867008	89833600	149818000	142119008	133588000	121434000	139288000	107734000	109011000	190803008	143267008	165976992	161512000	133646000	94404000	133734000	205147008	181152992	222919008
QSLQQVDEFLTK	P400034518,P400034519	2	46.1635	718.379	87425800	74766704	59039500	46816000	33510600	65185500	49488700	82086704	37886000	45969000	73714600	49586300	71377104	45687400	74817104	39521600	54350400	81680896	69589296	90855000
LLFAEDR	P400034518,P400034519,Q0WWP1,Q9M158,PGSC0003DMP400000457,PGSC0003DMP400000458	2	36.3333	432.237	150384992	129822000	52794400	53106900	63557500	96830704	89552400	122713000	65837600	74529904	102926000	54196200	112795000	92023696	115160000	73704896	69004600	86423504	94473200	113113000
LLFAEDRK	P400034518,P400034519,Q0WWP1,Q9M158,PGSC0003DMP400000457,PGSC0003DMP400000458	2	29.4528	496.284	22975200	19778200	7262540	8769290	19818600	21411700	13723100	23274800	11378700	13728400	12565400	9833980	11384100	20422200	23786000	21990000	12524000	27394300	13450200	28696100
VNYANVSTNNYALDEIEEV	P400034978	2	55.1014	1079.01	163058000	109254000	57517100	109709000	86742600	91653400	98746096	88318200	84729296	64492200	119975000	97401696	121505000	162932992	118964000	86919296	101996000	139490000	143872992	196014000
TTTDEITIKSK	P400035078,P400035079	2	30.8058	618.835	38435500	40064900	11957300	23940900	38178800	42039700	32557200	50806700	23402100	25594500	33518500	27263900	45150500	32335400	54632500	50235800	41604000	74438600	58656500	87184200
AEISAALNK	P400035552,P400035579	2	25.3888	458.765	1527434370	4792850	377768992	440132224	1157201150	1346984320	774056000	1136489980	624689340	789742460	4419130	413376896	1098948220	1394008320	1646228610	1186390140	1297595650	2132789500	1681340030	4296090
QLEDQAAAIMK	P400035552,P400035579	2	36.964	609.316	14673300	34106800	12706500	null	7635008	5552770	null	16824400	6085870	23117300	16946200	6651330	5283920	8021700	null	1599140	27817000	43122100	15235100	16970600
SLDSQIAALSDEIVK	P400035552,P400035579	2	57.2587	794.929	262272992	174987008	153384000	128737000	180014000	143884992	118442000	161118000	136334000	166038000	288164992	125364000	165792992	223142000	174567008	127702128	175995008	284278016	284320000	296807008
SLDSQIAALSDEIVKK	P400035552,P400035579	2	53.1875	858.977	113905000	139675008	71913000	99459904	129356000	178376992	113208000	144276992	115626384	128230000	205323008	116902000	139384000	242376992	170024992	122083000	199788000	287504992	248536000	299591008
SLDSQIAALSDEIVKK	P400035552,P400035579	3	50.8465	572.987	448041984	587844350	290011008	401849920	480777792	656298750	415747616	507981312	401867232	439510720	719265220	384043200	557428800	819855680	615410620	464946592	747303040	1233254140	973776510	1119849470
VEAELQEALASLESQKEETIK	P400035552,P400035579	3	53.1267	782.411	139215008	176224992	116364000	112700000	157040992	157760000	148600000	151702000	114583000	135091008	212022000	105649000	192528000	198955008	136886000	109496000	154232000	263664000	226996000	232228000
FMDERDSAIK Oxidation (M) @0.0100000000.0	P400035579	2	20.1683	614.288	15404300	11068000	2045950	4422960	10711500	13718000	4669090	14536300	6237580	7228140	4956310	3714580	6563240	15296400	19587300	15469800	12913600	18901600	16146100	35125100
FMDERDSAIK Oxidation (M) @0.0100000000.0	P400035579	3	19.8769	409.861	40814584	34526312	6726500	14574140	31450250	42679180	12987160	29299320	11566750	14464790	16059490	11683000	23968170	45754860	64435536	41376112	42577420	65892008	47148200	79423400
ETQQEVEQK	P400035579,P400035552	2	7.09424	559.77	null	null	null	null	316600	null	null	270035	null	null	159767	null	null	null	null	null	null	null	null	null
IYFSPLGK	P400035579,P400035552	2	42.2729	462.765	447872000	369684992	243291008	157768000	220979008	395408992	273179008	406543008	194638000	252400992	241912000	157312000	310988000	279310016	275161984	284111008	300572000	484596000	460384000	547372030
LSSVKDTSAEVK	P400035579,P400035552	3	19.1794	421.898	17757464	16351991	3811110	6442860	17249560	22742698	9824383	15961584	7539289	7587078	10258204	6637157	13588570	21384634	30862500	22550356	29053550	45708440	30924440	57147080
QLEDQAAAIMK Oxidation (M) @0.00000000010.0	P400035579,P400035552	2	26.0631	617.313	999970690	812512260	213816544	319621344	613996800	777425220	430537632	703257410	359112000	416228864	339348672	264330016	536110240	787773440	634439170	542684420	481339808	995050750	589785920	831246850
QLEDQAAAIMK Oxidation (M) @0.00000000010.0	P400035579,P400035552	3	25.6501	411.878	12120900	8350280	null	null	2078150	6282770	898994	2955780	null	null	null	null	5281810	4017090	4611870	5725470	null	11184000	null	4305580
SLDSQIAALSDEIVK	P400035579,P400035552	3	57.295	530.288	20365200	9984000	12604400	8952650	13504600	15613200	7886540	12165000	7311540	6858450	25247800	8620280	17998000	19048600	13192500	11443800	14441600	28279400	20442900	21142800
KNEDLETIK	P400035598	2	22.2673	545.294	16265500	12233900	12004100	7336430	16730100	13418200	6706100	9725650	4238710	9264760	10456200	2337700	14244800	7601420	10193600	12637990	9050030	10428900	11093000	13855500
LLEETTFYDK	P400035598	2	38.9837	629.816	15564900	11669100	18639400	4695410	9679400	8314400	5357740	6113320	3056860	11578500	9890700	1947250	11838400	5575180	8046470	8056020	7585640	12091800	10299100	10773800
SMEPDFWLVVEPK Oxidation (M) @0.0100000000000.0	P400035869,P400035870	2	55.726	796.891	21627300	9518830	26439400	7389030	23333500	17806300	7869560	5322190	3102840	14926200	17923000	3446980	26651100	14648100	16495200	12294500	15027200	27068900	14600700	22238800
VLQESYEADSVEEALACTPVSIEFEKPEK	P400035869,P400035871	3	57.6102	1099.87	14509000	9131370	20892000	3947150	16863600	10568300	null	null	null	14987900	11149000	null	17378600	13512800	8065720	null	14585000	19822400	9837400	16624300
EIIIDVPLANR	P400036655,P400036656,P400036657	2	48.1854	626.87	3593949950	2650080000	1620999940	1849059970	3010860030	2975990020	2579549950	3613649920	2278980100	2087100030	3367699970	2393609980	3248819970	4602619900	4024699900	2157499900	3288130050	5128560100	3956790020	3730370050
EYLNGDLIDPNV	P400036655,P400036656,P400036657	2	50.4142	681.336	210776000	178640992	154696992	191967008	243652000	196308000	169280000	284654336	187188960	134031000	277192992	217240000	209956000	408721984	347124000	238412992	195438000	332977984	270012992	452532992
LYAPDSAPALAINATIEK	P400036655,P400036656,P400036657	2	48.5189	929.506	1625769980	1416720000	906921980	1124007550	1766249980	1259910020	1201750020	1693190020	1050630020	1070070020	1356081020	1298029950	1591859970	2440189950	2535450110	1268060030	1959570050	2957560060	2432829950	2422640130
LYAPDSAPALAINATIEK	P400036655,P400036656,P400036657	3	48.4381	620.007	189135152	141413792	93183800	106815344	195080992	122034000	98349000	147091008	107639200	82010096	106752000	107659000	211764400	229564000	225132896	120133776	189203968	345968000	249142000	226330000
QGLLCGSDGLPHLIVSGDQR	P400036655,P400036656,P400036657,Q84QE7	3	48.9628	708.032	436828000	418772000	232832000	276408000	446313984	336703008	317652000	506440000	395407008	368121984	580289980	410209984	399006016	613889980	536748992	168655008	556926020	919856000	697686020	1016320000
GFIWPVAAYR	P400036655,P400036656,P400036657,Q9SHE8	2	54.6627	590.322	838502980	965326980	583147390	696526980	990441020	1136310020	1007809980	1067880000	1051275390	972147970	1551772030	1115789950	1086480000	1813949950	1342320000	827217020	1730770050	2681499900	2285829890	2573477890
RFDNYGK	P400036655,P400036656,P400036657,Q9SHE8,Q84QE7	2	18.5974	450.222	2678690	2266000	923119	1201000	2909040	2521130	1869220	3486240	1416210	770180	2160218	1093860	1533860	2815020	3038120	1632910	1285520	3598950	2841410	6588560
SYLIAVR	P400036655,P400036656,P400036657,Q9SLW9,Q84QE7	2	36.1776	411.25	2259394050	1804046590	484319392	657751040	1106693630	1601864320	1337125890	1880208900	924366980	1077381890	1852937090	712510140	1480991360	1939337340	1918460030	1573864320	1544437890	2784722430	2223363840	2509395200
SYLIAVRDDK	P400036655,P400036656,P400036657,Q9SLW9,Q84QE7	2	29.9409	590.325	42969000	28259400	5382230	19847800	41802600	29175700	18643600	32165200	24734700	21729600	26328800	19848600	22519700	53701200	64977400	53022500	47044500	76217104	58503200	124014000
FAMLGAVGSIAPEILGK	P400036884	2	62.1879	837.472	7189750	17443000	16732800	1902320	9439600	2693160	1321820	23566000	12920100	22177400	19404400	15723900	4636500	7422560	null	null	32575600	42985100	16609500	20441200
FAMLGAVGSIAPEILGK Oxidation (M) @0.00100000000000000.0	P400036884	2	64.1296	845.471	4475131900	2846404350	1673564160	2821593090	3217206020	3299541500	3020031230	3523150850	2357544960	1668472580	3795682050	2621381890	3521938180	3478103300	3262549250	2225519620	2360851200	3802387460	3345019900	4404004400
FAMLGAVGSIAPEILGK Oxidation (M) @0.00100000000000000.0	P400036884	3	55.6472	563.983	175732864	93128064	31604340	45702500	95056096	154147184	73080800	74527400	67069900	22058700	85611000	31470400	87512792	76236496	64322900	null	75667296	200984992	143987008	192536000
QSLSYLDGSLPGDFGFDPLGLSDPEGTGGFIEPK	P400036884	2	70.9889	1756.84	null	null	null	null	null	null	null	null	null	null	null	null	null	null	null	null	null	null	null	null
QSLSYLDGSLPGDFGFDPLGLSDPEGTGGFIEPK	P400036884	3	67.6247	1171.57	223670000	216093664	120187104	228952704	222319424	133805320	162154448	174706496	161006912	119897600	80986200	121966096	103388000	206493600	192891440	144701024	145009584	234955408	231019584	180418384
QSLSYLDGSLPGDFGFDPLGLSDPEGTGGFIEPK	P400036884	4	66.6814	878.931	2322390	8656780	null	21994100	12178800	4727500	null	7633420	null	3757690	null	5182100	null	2658870	null	5944180	null	13044500	8248610	null
GLGGSGDPAYPGGPLFNPLGFGK	P400036884,P27522	2	59.1817	1088.05	541291010	391910016	268680992	407576992	417163008	384723008	437892000	463300000	374070016	290924000	424638016	418033984	352796000	514366016	413761984	305468992	316244992	556920000	503128000	507996992
GLGGSGDPAYPGGPLFNPLGFGK	P400036884,P27522	3	59.1137	725.704	36867400	23344500	10998000	12354800	36048600	25487400	33781100	29478400	28072900	14671470	27054500	17542600	44312700	31883680	21438200	19658300	21861300	65589300	39239200	43289200
GLGGSGDPAYPGGPLFNPLGFGKDEK	P400036884,P27522	2	54.4558	1274.14	52680700	37287700	11857100	43994700	25255500	38608400	51421600	57021000	52846100	34577400	60953800	59097000	44259000	89264400	74703560	40741600	53302700	70598704	74932496	117211000
GLGGSGDPAYPGGPLFNPLGFGKDEK	P400036884,P27522	3	55.1782	849.759	1685600000	1564240000	732331010	1816290050	1150640000	1635309950	1611280000	1707219970	1794130050	1174659970	1912920060	1656440060	1429730050	1581890050	1978589950	1407020030	1474720000	2567300100	2194959870	3330820100
QLWFASK	P400036884,P27522	2	41.3528	440.242	570400000	451032992	235554000	245922000	296065984	628067970	461904992	613945020	426984000	320731008	396291008	273636000	480305984	356515008	662940030	372265984	472556992	867153980	547057020	715837950
FQDWAKPGSMGK Oxidation (M) @0.000000000100.0	P400036884,P27522,P400013707	3	27.2362	456.554	945894020	835937980	261552992	424151008	844796990	948937980	634820990	997825020	606752000	466721984	441646016	437940000	759860990	1020499970	813163010	496537984	567987970	1228109950	666057020	794334980
WLAYGEVINGR	P400036884,P27522,P400013707	2	44.9336	639.338	1928999940	1681400060	955152000	931350020	850070020	1759369980	1520259970	2415209980	1345440000	1138589950	1294659970	1033379970	1346480000	1654989950	2432499970	1135730050	1694809980	2737710080	2214490110	2579670020
VSQINITPYPVK	P400036969	2	40.239	679.89	5600950	19436600	18786000	11317800	12938900	8975010	11288500	15837400	9783720	17109800	14544700	8097180	16491800	13469700	20051700	21467000	24205400	27149400	22645900	20076000
FYLQPLTPAEAVQR	P400037659	2	48.358	816.945	1905980030	1482240000	1044689980	1140009980	2072150020	1996429950	1361030020	1850630020	1535260030	1244889980	1805389950	562040000	1807369980	2188539900	2169789950	1293910020	1818589950	3314850050	2614080000	2573789950
FYLQPLTPAEAVQR	P400037659	3	48.358	544.966	136622000	102173000	63914700	48778700	150400992	187995008	81189104	107861000	80908200	39411900	79247400	23974100	180132000	147406000	132622000	94678400	158148000	312920000	227111008	192748992
NSDEAQKYYAETVTTLNDVLANLG	P400037659	2	71.1289	1315.14	28780100	20514700	null	3999640	10126700	8837700	null	12072900	6549540	4790400	null	null	1904780	37445360	5314030	null	49506100	69494896	29733500	20854200
KAWPYVQNDLR	P400037659,Q5EFR4,Q5EFR5,Q53UI6,Q41932,Q672Q6,Q9XFT3,Q9XFT3-2	2	36.5464	695.37	39462300	27764000	5531250	9257140	18559900	39178600	18026100	33338800	18932200	19843500	27589000	4170200	22043300	29444600	40631400	27528200	34025000	58020700	43397200	49246600
DFSLPLK	P400037659,Q672Q6	2	45.0272	410.236	1628050940	1252392450	711813440	664074430	681881410	1844987650	835128510	1821335680	997461060	849527170	739898620	260596256	1116763010	940643010	1416658690	825440450	1369705220	2619108350	1998110590	2647703300
GKLQDLSGK	P400037659,Q672Q6	2	20.1158	473.272	24261400	31074100	11774600	19542700	36906100	26892800	11198400	40389000	18283300	4807540	27721000	6990110	32192200	17801800	11009700	6128160	7338820	51345400	40375000	74492000
VGPPPPPSGGLPGTLNSDEAR	P400037659,Q672Q6	2	39.1504	1008.02	2497220100	1632770050	1060129980	1097440000	1750189950	1733289980	1423500030	2296310020	1598230020	1278610050	1762489980	407787008	1763820030	1937379970	2230000130	1880669950	1755049980	3270599940	2496580100	3484940030
VGPPPPPSGGLPGTLNSDEAR	P400037659,Q672Q6	3	39.1399	672.347	634118980	451177984	175784000	149308000	225218000	268460992	293403008	416030016	271193984	208380000	158526000	59782800	557916990	373761984	501200000	347193984	533700000	1277880060	915238980	1089709950
YYAETVTTLNDVLANLG	P400037659,Q672Q6	2	67.6308	928.972	569942140	511911072	267631456	309969856	561032830	381583584	299534368	499542016	381461152	345740640	406604928	149604000	411889248	448424288	387992032	336333184	340715296	456046656	564576830	469653760
TISDLDHAAK	P400037659,Q672Q6,Q5EFR4,Q5EFR5,Q53UI6	2	22.4812	535.779	155944992	138803008	34296700	46053100	175100000	178000992	89971800	177060000	175134000	138410000	95939696	23356000	128427000	149568000	172903008	150942000	209364992	383356992	286319008	464216992
AWPYVQNDLR	P400037659,Q672Q6,Q5EFR4,Q5EFR5,Q53UI6,Q9XFT3,Q9XFT3-2,Q41932	2	43.2926	631.323	662361980	492228000	252392992	293790016	458616992	630553150	416700992	821728000	492719008	422369984	551825020	127114000	456296000	414948992	435192000	425751008	584253760	920243840	874116990	849273020
KAWPYVQNDLR	P400037659,Q672Q6,Q5EFR4,Q5EFR5,Q53UI6,Q9XFT3,Q9XFT3-2,Q41932	3	36.5739	463.917	72567600	67259856	24591730	27901740	47209400	79969776	34613800	66738532	40315800	43204500	61469960	13436610	48058600	67231440	81442864	61748540	74964168	129378592	81678600	111052096
AVLVEHMEGQR Oxidation (M) @0.00000010000.0	P400037980	2	19.4408	642.822	1816830	1777440	642992	612699	2210100	1855120	1377920	2592760	1273170	1795890	1454460	677874	1771570	2257840	2380260	2082700	1828600	3000770	2383760	4323430
AVLVEHMEGQR Oxidation (M) @0.00000010000.0	P400037980	3	19.4368	428.884	10793700	11845800	3419270	3548180	9795380	9775380	6074940	11837200	6768510	7378780	7056680	4133900	10253000	11553400	15460800	11103000	11627000	20136900	11950500	18888800
AELWRDELIEEIEQK	P400037980,P400037981,P400037982	3	53.3117	634.335	4605870	5839760	5947680	4079010	5719470	5276940	3825440	5292310	5897840	5342150	6374620	3644820	8842470	9322860	6880600	4573490	6709410	17841890	14883640	11656390
AAEAAPPAATATATAEGEAPPAK	P400038088	2	31.2403	1032.52	573459010	462809984	214376000	253275008	566499970	447350016	340524992	349193984	232998000	355360992	473975008	227536992	481502016	447504000	752846020	488936992	523755008	717372030	584755970	883990020
AAEAAPPAATATATAEGEAPPAK	P400038088	3	31.2503	688.682	475188000	518271008	111186000	124700000	326387008	262878000	188322000	159028992	93522200	184040992	159014000	107843000	378640000	286391008	453251008	452211008	369454016	645742020	433311008	652659010
GTGSVVAVDQDPK	P400038088,P400034978	2	24.767	636.829	2596888580	2382807040	721136900	1000227840	1607558020	1674934140	1696214140	1969308030	1290928640	1209085180	1521702780	996149250	1907223680	2340489980	2593352450	2052547460	1818407810	3029912060	2522384640	2340544770
GTGSVVAVDQDPK	P400038088,P400034978	3	24.3762	424.891	29827300	46830800	14546400	4752480	30564370	23699230	23613170	21541400	7098940	14582090	6939060	4027580	25321370	16976700	27233200	28887800	23400140	43914000	22697900	10607100
FNKVNYANVSTNNYALDEVEEVK	P400038088,Q41229	3	45.017	887.437	197200336	141540000	60439200	114293000	100491000	156200000	96295600	186454000	111929000	98400304	137079008	126001000	107627000	241350000	361292992	176514000	301287008	402804000	302496992	525942016
VNYANVSTNNYALDEVEEVK	P400038088,Q41229	2	46.64	1136.05	1044220030	863604990	667443010	640470020	701204990	1029169980	773305020	1029800000	624488000	621996990	808950980	675408000	850604030	1115260030	1210080000	611460990	773974980	988140030	967059970	941003010
VNYANVSTNNYALDEVEEVK	P400038088,Q41229	3	46.6424	757.701	141902000	128016000	61689300	32115200	65609300	132569000	75567504	93270496	46600400	32284600	47676000	40799200	132957000	120161000	113600000	62044100	119292000	207658000	205824000	127914000
TRYPVVVR	P400038088,Q8LC58,Q9S714,Q7FY22,Q8H127,Q9FDY5,Q9S831,Q9ST33,P400034978	2	25.7947	495.3	1095910020	918798980	233488992	378486016	911115010	727030020	773414980	781873020	575158020	600480000	589131010	366529984	802817980	1039480000	1222610050	1059720000	813291010	1323970050	1215100030	1064019970
FADGIVFDSSYKR	P400038113	3	40.6364	502.255	26855100	33901400	13864900	14468600	18562200	33315100	22159100	37503800	17358400	28478600	25629700	13214600	24036700	27748300	52344500	32043100	44332600	69363104	48769500	51760600
FVELYSGNR	P400038113	2	34.9783	542.777	53725000	37842000	11430700	14524600	15359300	39195000	23365900	28701900	17441700	21253400	22844600	13542900	24596300	35873200	45056200	36324700	33662600	37538600	44566900	56806900
SGLGYCDIAVGSGEEAPYNK	P400038113	2	41.714	1043.98	24511400	19649100	12386000	12251700	19979200	22630100	14881800	22279300	12058500	15220700	21008400	10779000	15323100	15305900	18847300	16010600	21124500	30960100	23966200	31738300
ANSYSVHGSALGAK	P400038185,C3RXI5,A1BQW9	2	23.9921	681.346	7443340	8907210	7659290	3556520	17503600	15211100	12993100	10122100	3702960	19590500	6280790	4092810	14067800	11479800	11271500	16084100	22516700	21785400	18081600	29607300
VSIEAGSTFGWQK	P400038185,Q43848	2	42.83	705.36	30015900	25477100	44533200	9801790	43605600	46079500	47024100	32796500	9421480	36476600	20723200	9714710	49065500	17885300	19714400	19212100	43165600	33926200	27926200	30975200
VVSFVCWELYDEQSAEYK	P400038185,Q43848	2	59.9272	1126.51	null	null	null	null	null	null	null	null	null	null	null	null	null	null	null	null	null	null	null	null
YAEEAADLK	P400038185,Q43848	2	24.4376	505.249	73783304	86763000	73589224	23651328	131015248	120297032	93340400	84772848	22154810	82302712	32421550	26644376	107159504	80536000	75719920	98742304	91972896	108369472	69154688	80223000
VLPGFLGGSADLASSNMTLLK Oxidation (M) @0.000000000000000010000.0	P400038185,Q43848,A1BQW9	2	54.9974	1054.06	100496000	97484800	125440000	50067400	132526544	106943000	128372152	68355400	24789400	95578200	72063504	48266400	136689664	107136000	62143000	67109296	118138000	104323000	72376000	92541296
SIITGELPAGWEK	P400038185,Q43848,A1BQW9,F4JBY2,Q8LE99,Q8RWV0,Q9LZY8,Q84WI5,B9DGH8,Q944P9	2	47.3875	700.877	62058900	null	138375008	23134900	120291000	null	null	44602500	null	91457800	null	null	null	90449400	46026700	null	123712000	null	61567100	null
ALPTYTPESPADATR	P400038185,Q43848,C3RXI5,A1BQW9,P400012430	2	35.7722	795.398	112534000	197426000	165132992	51847200	165212992	248859008	200831008	152560000	33520100	179500992	122560000	61532000	217492000	169560000	112071000	201356992	244808000	162352000	165943008	230119008
TPSILALSR	P400038185,Q43848,C3RXI5,F4JBY2,Q8LE99,Q8RWV0,Q9LZY8,Q84WI5,B9DGH8,P400012430	2	40.9156	479.292	44326800	70331000	108471000	19867800	85848000	104783000	86048704	53444200	17832000	80651400	28428700	22536100	106814000	45074300	52454900	66310200	114182000	116109000	71229000	94596096
KTPSILALSR	P400038185,Q43848,F4JBY2,Q8LE99,Q8RWV0,Q9LZY8,Q84WI5,B9DGH8	2	35.5202	543.34	21275100	33317000	27429000	8123660	25327800	43930000	40692200	28741300	8106310	37577700	17183100	10664300	36308700	26808100	26662900	38564600	38202100	25483500	25539100	41093400
LNEGVVQATLLALAGLK	P400038248	2	69.2182	855.516	null	null	8623520	null	null	null	2315980	1836060	null	4670940	1458940	null	null	null	null	null	null	null	2252430	921621
TPIAGYACR	P400038248	2	27.6307	504.751	null	2400160	6593320	null	15008800	7220310	null	null	null	6630110	1287640	null	6817170	null	null	null	7385510	6206870	null	4843240
AVGQYTSAESR	P400038442,P400038443	2	21.1853	584.784	11584500	9462410	4422310	5558280	11550200	11386400	8219330	13272000	6473530	5841910	7472770	4439130	8498330	9923400	9964090	7363100	6924550	12969700	9806750	14927900
AKEYISLLK	P400038531	2	35.7741	532.824	490872480	347472480	74169104	126048000	241815488	349347808	243695344	512462688	267035008	244714000	343617504	148245360	202597936	502969984	579142780	477382880	530221408	640898820	745954750	1234182780
QVPSQNGISHFEAGDVR	P400038531	2	34.0354	920.954	17959000	20426100	300476	null	6560630	14913000	7831920	10707300	10833300	11384900	5215080	3664570	6130920	27668800	31013000	20674300	40282800	70978896	52440300	89453400
QVPSQNGISHFEAGDVR	P400038531	3	33.9389	614.305	234332000	197587008	48396900	68521000	139864000	184080992	110831000	182676000	173344992	155267008	182031008	109283000	112247000	300996000	265631008	192936000	384641984	625393980	456673984	813177020
FVFFNFQR	P400038531,Q9S7N7	2	55.2162	552.788	436425888	393588384	157262704	267948160	413418400	441424064	361584000	442069728	407982144	339494016	661622980	352109280	349457088	854074300	636268800	423918016	853607360	1221889410	1277872510	1577360380
LSSINVENIEANR	P400038572	2	39.1786	729.884	null	5030710	8365570	2459230	13175800	9577570	9223040	5908140	1994340	1475550	3723020	2640010	18968500	7524270	4580090	6741680	4901300	6791390	2507450	3755800
YNEATGDPSYPIPPGLPFDKLPEDWR	P400039021	3	58.2621	992.152	11794500	7832830	null	6620210	11813000	7739810	6082720	7154340	8452080	6048170	8641100	5008040	11742200	12901300	8825510	4236960	9980890	16488000	12256600	13868300
FAVLNTGIYECR	P400039021,Q9SLI4	2	44.8853	721.862	26882400	24136000	17972800	11308600	17031500	27539400	20803900	38923600	17683000	19239800	18206800	10355900	20645200	23439500	34105100	10119700	27571100	46853600	38531000	41668700
RLESLTEAELQVLLEQVEEEK	P400039186,P400039187	3	65.9162	829.107	null	null	null	null	null	null	null	null	null	null	null	null	null	null	null	null	null	null	null	null
IFPSLEDAAEFGK	P400039308	2	51.1467	712.362	27403800	40496800	34705400	31148700	54788500	36085000	33763400	52228000	26669100	33498200	35428600	25601200	46621800	45193600	39869700	28551100	35699900	61093500	49266900	55172200
CTNCATEMIYDSATR Oxidation (M) @0.000000010000000.0	P400039411	2	34.0216	904.87	46406700	38974500	14755100	19077000	21601400	33588100	22102600	28700900	12882000	13228500	18927900	10579700	21188800	28174300	25968600	9134750	10840200	23632000	11375600	22497700
FLEASMAYVSGNPILTDQEFDK Oxidation (M) @0.0000010000000000000000.0	P400039411	2	52.246	1246.09	14984300	15812400	12406000	13067100	17639800	10879200	13799000	16045100	7505780	9831710	12665100	11599200	17318100	17328200	12718400	7421350	7775510	12918900	9302330	12599600
FLEASMAYVSGNPILTDQEFDKLK	P400039411	3	60.2387	906.124	null	null	null	null	null	null	null	null	null	null	null	null	null	null	null	null	null	null	null	null
FLEASMAYVSGNPILTDQEFDKLK Oxidation (M) @0.000001000000000000000000.0	P400039411	3	52.5699	911.458	172546000	192384992	104879000	162131008	191072992	172980000	141700000	207466000	97066600	103716000	156408992	125645000	190916000	246608992	164151008	106770000	123867000	181148992	144044992	173088992
ILQYCSLDR	P400039411	2	35.1058	584.297	41348400	41930100	11254700	13835800	16195600	53998000	39090400	25123400	22619100	27717600	28413300	15432700	42358700	37050200	37245300	15833700	23187200	29530000	36574300	47677000
KSMGEMEQEFLQALQSFYYEGK 2 Oxidation (M) @0.0010010000000000000000.0	P400039411	3	61.0716	892.409	44447200	19646900	27560800	37307600	15452200	19683500	28504400	34405000	23266700	23473800	32560900	28139000	33637600	40749500	31904900	20472600	12253000	20807100	27511800	34343600
LITLPEGSSA	P400039411	2	40.865	494.274	71920400	80259504	37442400	36949100	48877300	102365000	50359000	59997800	28374800	34657000	30902800	34437800	104281000	60108400	90237296	64880600	75218096	148008000	93816304	115153000
LKMDGSDIVVEGPR Oxidation (M) @0.00100000000000.0	P400039411	2	29.9915	766.396	43671600	39202400	3834410	7104710	31486200	32778300	20739600	31204400	11142700	13368800	10702600	5504390	28002300	31476800	37958400	29331200	21152100	38935200	24116300	41200800
LKMDGSDIVVEGPR Oxidation (M) @0.00100000000000.0	P400039411	3	29.9947	511.266	183927008	211364992	41026800	78566000	137743008	163164992	102800000	157776992	64855800	68318600	91821696	63936400	144220992	159342000	152011008	117107000	88151696	172760992	104881000	177580992
MDGSDIVVEGPR	P400039411	2	39.8103	637.806	null	null	null	null	null	null	null	null	null	null	null	null	null	null	null	null	null	null	null	null
MDGSDIVVEGPR Oxidation (M) @0.100000000000.0	P400039411	2	30.5138	645.806	50757200	47613800	14364900	20799400	22737000	33986700	29890200	35691900	15795900	19307100	28435900	17840000	38386900	25903700	39423800	29445300	15374300	37867600	24889000	39591900
SMGEMEQEFLQALQSFYYEGK 2 Oxidation (M) @0.010010000000000000000.0	P400039411	2	64.7529	1274.06	35004200	26470700	16075910	13222840	18318270	14550310	15134580	25759300	13068390	14365100	14178650	12834490	15758770	25073300	10348100	9534740	12842090	21122970	16326350	20638330
SMGEMEQEFLQALQSFYYEGK 2 Oxidation (M) @0.010010000000000000000.0	P400039411	3	64.7563	849.711	23242680	20323980	13460320	32589900	21677500	22927900	15932260	25696500	14167770	10678460	10555360	14602530	23465700	24025000	7648880	16016290	12262330	23290090	16661400	16164910
VYSDLYIDYLK	P400039411	2	50.8163	696.362	9301940	9211340	8391600	5994150	11384300	10781500	7348960	10792300	5844560	6652000	13050700	8177780	11745700	16154300	13648100	5549420	7620790	12493100	7913340	12668800
FFQIYVYK	P400039723,P400039724	2	49.3676	554.3	39789700	55424500	62688300	19628000	29832600	25612200	22776600	36918900	14032600	13586600	29353200	16207600	62013000	46279000	23567400	16230200	26454500	25548800	26040800	28832600
NAGTIIDSGTVITR	P400040088,P400040089	2	37.9511	709.389	12020200	9824940	4847290	4613390	3052630	4153940	2776900	4108520	3655780	5852820	8264960	7070300	8086220	7488370	7720630	8581380	9796570	17217000	8883510	16247000
LDDLVAAIEGVR	P400040330	2	53.6255	635.857	8423680	9584530	13217300	5343990	14984700	13109100	10270400	5266490	2631100	9434680	11269100	4258540	13828300	16359600	9504150	7300070	14693600	19093200	13392300	10018400
LDCNQDNRPLAK	P400040330,E5L8B6	3	19.59	481.906	7357620	5707200	4733250	1992970	13204800	12256500	6244388	5176610	1587430	5519380	4207560	1932957	10676800	8562000	7153160	4314740	11729800	13434700	7496530	12737800
LRDYEIEK	P400040707,P400040708	2	41.5305	533.279	1049939970	859865980	319606016	423614016	674974980	939680000	661584000	1163869950	813382020	599140990	954417980	589852540	579307010	975536000	1021980030	862811010	1151970050	1891619970	1656870020	2636059900
LAVVAMAGLAAEGLK Oxidation (M) @0.000001000000000.0	P400040834	2	44.7088	715.411	27197120	15481300	14301200	9897690	5643390	16518000	11852100	23074000	8969670	12390700	9909480	6580450	17615300	10073600	22272100	8325400	7121370	17061300	11537900	16687000
VVGQSADLFTLQR	P400040834	2	44.5088	717.395	32466030	29515200	22467100	16242400	12757700	34206300	17854900	31307800	14863000	22129300	24627900	14221500	31011800	20338800	33946900	13912900	23130100	37836500	31867300	41168800
NAENLAIPSVR	P400040834,P400040833	2	37.9131	592.327	44333900	32506800	16036900	13835700	15686900	26770000	20475300	19628500	13102900	17794800	19518600	12630800	29352800	27295200	22559700	23571600	null	null	null	40091500
ELTTLGIK	P400040834,Q8LBF2,Q9SJ03,P400040833	2	35.4696	437.768	32751000	33364900	10021600	12057600	10472900	28466600	18880600	24769800	12073900	17927700	19911700	12736200	27862000	27395200	32394600	28056400	21643500	24522600	29860700	40050300
LLNSIENK	P400040949,P400048670,P400048671,Q9M2P7	2	25.1198	465.768	35184520	36965832	12584600	10241000	24428700	27372700	29412200	32496800	25766900	22836400	19349100	6527750	34771860	25638000	31956600	31432500	23463200	41132300	36973300	25914900
AALAAGADKDEEDSEGR	P400041114	3	20.7389	568.928	7622170	7657730	4592440	2798840	8505160	7778100	4265200	8936370	3820850	5171980	6727087	2417310	6361970	4866540	6314950	7950440	6688320	10737000	8060330	11612900
GPLGEMAITYPR Oxidation (M) @0.000001000000.0	P400041249	2	37.9137	660.838	13362500	11055700	25312200	4217970	14184900	12247540	14431200	8594750	5733490	14672200	7695700	4407680	16423500	9653100	5847410	12487400	12010100	16287800	8092100	13113400
SEIGQFAASIR	P400041249	2	42.9278	589.814	11483400	9469670	20473300	4437010	14189410	11513170	11222100	12150100	5586810	12011400	10262100	3898760	13075700	5100790	5004490	6092390	10178500	11294800	8185870	11712600
LPMFGCTDATQVLAEVQEAK	P400041818,P08706,P32764,P05349,P07180,P07179	3	58.3248	736.699	1377530	2565240	9672300	1169420	6328790	3793050	4187730	1460490	1280640	7018800	3348970	3722500	8220270	4847900	1827160	2249910	8309190	14791900	5675770	6853560
EHNSSPGYYDGR	P400041818,P10647	2	19.9064	691.293	2108730	3391420	2127940	507216	9284760	7446630	6176700	null	1793090	6476410	null	945414	6856610	5839850	4839390	5392170	7476080	10705100	8360840	13200000
EHNSSPGYYDGR	P400041818,P10647	3	19.2382	461.197	17464100	21592914	29880510	7588286	52038280	34997780	34080192	35831660	14099237	42165800	24215930	13715286	41030832	36117552	29786060	25556196	53925460	61808112	48513820	66233640
NAYPQAWIR	P400041818,P10647,P400034002	2	39.6813	559.794	602046980	659236990	683318980	188232000	772998020	743028990	888257020	685656000	276646016	810174980	369478016	245624000	907136000	775036990	721379970	771974980	1416359940	1488220030	1069630020	1205689980
LPMFGCTDATQVLAEVQEAK	P400041818,P32764,P05349,P07180,P07179,P08706	2	61.5653	1104.54	null	null	null	null	null	null	null	null	null	2441290	null	null	null	null	null	null	null	null	null	null
LIEQEESGGGK	P400042121,P400042122	2	18.2495	573.786	1036830	1303780	780736	466540	1922440	1313250	1087290	1514500	362743	493424	881302	415102	1242230	523433	685758	301080	901013	1525950	1106200	2133600
DSSATLECGGDR	P400042353	2	21.023	634.265	3983350	3468620	2833250	1142160	5518180	3171560	1968310	4771300	2037270	1755340	1742560	477101	2734260	2837450	2409790	1533600	2680350	4169360	2886860	4228560
AQEAMQSAGMDSQPVMTAAK 2 Oxidation (M) @0.00001000010000000000.0	P400042391	2	31.0832	1042.46	null	null	null	null	null	null	null	null	null	null	null	null	null	null	null	null	null	null	null	null
AQEAMQSAGMDSQPVMTAAK 3 Oxidation (M) @0.00001000010000010000.0	P400042391	2	20.1724	1050.46	48911880	35495808	16664881	19925160	37592008	46246592	28191904	43604632	16536691	22104792	29290830	14450197	27363620	24634378	37727020	21767132	19918796	34415260	24572796	36959328
AQEAMQSAGMDSQPVMTAAK 3 Oxidation (M) @0.00001000010000010000.0	P400042391	3	19.5119	700.641	54228420	44426652	24644996	27336140	37400568	48301096	28438880	30217220	11958900	19482800	29295700	15157720	41388496	34579032	41692644	38040264	23315380	45299768	23088100	33578916
GELTPAQTLDNMCSK	P400042391	2	44.6448	832.885	null	null	null	null	null	null	null	null	null	null	null	null	null	null	null	null	null	null	null	null
GELTPAQTLDNMCSK Oxidation (M) @0.000000000001000.0	P400042391	2	31.89	840.885	25707800	20663400	6062640	8858150	15885300	10217600	12507600	11482100	8484550	10566300	13037200	7323670	18079700	12195700	14633400	6964010	6026140	11862100	8015650	10541300
KAQEAMQSAGMDSQPVMTAAK 2 Oxidation (M) @0.000001000010000000000.0	P400042391	3	28.5365	738.007	null	null	null	null	null	null	null	null	null	null	null	null	null	null	null	null	null	null	null	null
KAQEAMQSAGMDSQPVMTAAK 3 Oxidation (M) @0.000001000010000010000.0	P400042391	2	16.3232	1114.5	2878990	3383840	83914.4	288141	2319800	2704670	1881390	3155430	654057	746322	503686	227044	1691240	1717420	2539040	1846930	1162210	2454840	1813840	3253290
KAQEAMQSAGMDSQPVMTAAK 3 Oxidation (M) @0.000001000010000010000.0	P400042391	3	17.7652	743.338	134325312	119144888	43879280	63462768	101179984	130377872	72484608	110334600	44025656	48158340	77459944	43576248	94125600	94637056	121959024	85314048	63808068	103895304	70112024	104535032
LGTDSYNFSFAEILSPSR	P400042391	2	60.6352	1002.49	205728400	133755000	97800000	125912000	95807400	100541000	93467936	152451008	100610056	110236608	112284048	118583856	124815000	162107184	126424520	103721000	119733000	194760640	124566384	179751584
MIQIPLEDLPSK	P400042391	2	50.9027	692.384	2150200	6311760	4914010	null	1870700	null	null	4734150	null	6245090	6269490	3307290	null	2220480	null	null	5554990	14523800	3036570	4866090
MIQIPLEDLPSK Oxidation (M) @0.100000000000.0	P400042391	2	47.1131	700.382	377748000	406908992	143720992	196818000	149206000	405340000	277561984	249312000	136732000	127434000	270854016	198344000	340063008	151058000	332369984	172328992	174676000	396078016	216172000	316308992
NASPVISDVTK	P400042391	2	29.5554	565.808	354366016	318110016	104069000	126849000	218375008	275291008	164682000	241511008	128318000	159347008	179484992	108549000	183230000	208312000	286425984	235052000	211015008	383920992	170239008	336123008
NASPVISDVTKK	P400042391	2	25.7569	629.855	58184400	45204900	14251300	20019900	35014800	32232400	30172600	29799200	22826300	31567400	28117000	16347000	36266300	38624700	51085700	47429800	36140700	59423000	42879300	42538300
NASPVISDVTKK	P400042391	3	25.7655	420.24	161923008	183156992	36543100	52220200	99957800	94754704	79459200	76112896	56504900	74376000	65752500	48839600	116915000	109102000	165519008	129168000	128009000	213962000	131142000	90447696
SLTSFGFNNCWIMTDGFSGGK	P400042391	2	64.3785	1163.52	null	null	null	null	null	null	null	null	null	null	null	null	null	null	null	null	null	null	null	null
SLTSFGFNNCWIMTDGFSGGK Oxidation (M) @0.000000000000100000000.0	P400042391	2	57.6632	1171.52	19541590	13527500	13388400	12212100	13658900	8422970	8591320	8958480	7959740	8878800	13967600	7791930	10975400	15116740	9361690	4051280	9806260	16606300	7787770	10488200
GSNIVIMDSYSDSAK	P400042391,B0FPA4	2	43.1408	793.873	null	null	null	null	null	null	null	null	null	null	776263	null	null	null	null	null	null	null	null	null
GSNIVIMDSYSDSAK Oxidation (M) @0.000000100000000.0	P400042391,B0FPA4	2	33.3244	801.873	181978000	133738000	56750900	64001100	69957296	111542000	74167904	82247904	47107600	57964900	54104000	46405100	96152896	96407696	111793000	85130096	60845200	107889000	61565500	100659000
[truncated: 1,043 more rows]

## Sheet: Table S2
Supplemental table 2. Quantiative analysis on the protein level. Regulation is the log2 regulation against control.
[truncated: 586 more rows]
